# Supplementary material for: Local Duplication of TIR-NBS-LRR Gene Marks Clubroot Resistance in Brassica napus cv. Tosca
Source: Front Plant Sci. 2021 Apr 8;12:639631. doi: 10.3389/fpls.2021.639631 (PMC8082685; doi:10.3389/fpls.2021.639631)
Supplement: Supplementary file 7 [file Table_1.XLSX]

## Sheet: Tab_S1
Table S1. SSR/SCAR markers used in the analysis
Name	Primer_sequence_5_3	Reference
BrSTS 78f	GTTTTCCCAGTCACGACCTCTCCTCTAACCTGTTCCAAGAA	1.M., N. Kubo, S. Matsumoto, K. Suwabe, T. Tsukada, M. Hirai. (2006). Fine map ping of the clubroot resistance gene, Crr3, in Brassica rapa. Theor Appl Genet, 114: 81-91.
BrSTS 78r	GGTGTATCCACACACTCATCAAGT	1. M., N. Kubo, S. Matsumoto, K. Suwabe, T. Tsukada, M. Hirai. (2006). Fine map ping of the clubroot resistance gene, Crr3, in Brassica rapa. Theor Appl Genet, 114: 81-91.
BrSF024f	GTTTTCCCAGTCACGACTGAGTCAAATTGGGTGACGA	2. J. Lee, N. K. Izzah, B.S. Choi, H. J. Joh, S.Ch.Lee, S. Perumal, J. Seo, K. Ahn, E. J. Jo, G. J. Choi, I.S. Nou, Y. Yu, T.J. Yang (2016). Genotyping by sequencing map permits identififation of clubroot resistance QTLs and revision of the reference genome assembly in cabbage (Brassica oleracea L.). DNA Research, 23(1), 29-41.
BrSF024r	TCTGGTCAAAGAGATTGCAACTAA	2. J. Lee, N. K. Izzah, B.S. Choi, H. J. Joh, S.Ch.Lee, S. Perumal, J. Seo, K. Ahn, E. J. Jo, G. J. Choi, I.S. Nou, Y. Yu, T.J. Yang (2016). Genotyping by sequencing map permits identififation of clubroot resistance QTLs and revision of the reference genome assembly in cabbage (Brassica oleracea L.). DNA Research, 23(1), 29-41.
BoSF184f	GTTTTCCCAGTCACGACTTGCACGTACGTCTTTGAGG	2. J. Lee, N. K. Izzah, B.S. Choi, H. J. Joh, S.Ch.Lee, S. Perumal, J. Seo, K. Ahn, E. J. Jo, G. J. Choi, I.S. Nou, Y. Yu, T.J. Yang (2016). Genotyping by sequencing map permits identififation of clubroot resistance QTLs and revision of the reference genome assembly in cabbage (Brassica oleracea L.). DNA Research, 23(1), 29-41.
BoSF184r	CTGCAACGAGGATGAAAACA	2. J. Lee, N. K. Izzah, B.S. Choi, H. J. Joh, S.Ch.Lee, S. Perumal, J. Seo, K. Ahn, E. J. Jo, G. J. Choi, I.S. Nou, Y. Yu, T.J. Yang (2016). Genotyping by sequencing map permits identififation of clubroot resistance QTLs and revision of the reference genome assembly in cabbage (Brassica oleracea L.). DNA Research, 23(1), 29-41.
BoSF1941f	GTTTTCCCAGTCACGACTCTCCACGTTGTCCATCAAA	2. J. Lee, N. K. Izzah, B.S. Choi, H. J. Joh, S.Ch.Lee, S. Perumal, J. Seo, K. Ahn, E. J. Jo, G. J. Choi, I.S. Nou, Y. Yu, T.J. Yang (2016). Genotyping by sequencing map permits identififation of clubroot resistance QTLs and revision of the reference genome assembly in cabbage (Brassica oleracea L.). DNA Research, 23(1), 29-41.
BoSF1941r	TTTAATCAACGATGCTTGCG	2. J. Lee, N. K. Izzah, B.S. Choi, H. J. Joh, S.Ch.Lee, S. Perumal, J. Seo, K. Ahn, E. J. Jo, G. J. Choi, I.S. Nou, Y. Yu, T.J. Yang (2016). Genotyping by sequencing map permits identififation of clubroot resistance QTLs and revision of the reference genome assembly in cabbage (Brassica oleracea L.). DNA Research, 23(1), 29-41.
BoSF2294f	GTTTTCCCAGTCACGACCACCATCGTTTCTGTCCCTT	2. J. Lee, N. K. Izzah, B.S. Choi, H. J. Joh, S.Ch.Lee, S. Perumal, J. Seo, K. Ahn, E. J. Jo, G. J. Choi, I.S. Nou, Y. Yu, T.J. Yang (2016). Genotyping by sequencing map permits identififation of clubroot resistance QTLs and revision of the reference genome assembly in cabbage (Brassica oleracea L.). DNA Research, 23(1), 29-41.
BoSF2294r	TAACCACACCTTCCGTTTCC	2. J. Lee, N. K. Izzah, B.S. Choi, H. J. Joh, S.Ch.Lee, S. Perumal, J. Seo, K. Ahn, E. J. Jo, G. J. Choi, I.S. Nou, Y. Yu, T.J. Yang (2016). Genotyping by sequencing map permits identififation of clubroot resistance QTLs and revision of the reference genome assembly in cabbage (Brassica oleracea L.). DNA Research, 23(1), 29-41.
BoSF2435f	GTTTTCCCAGTCACGACCCCACAATTCGGTATTCACC	2. J. Lee, N. K. Izzah, B.S. Choi, H. J. Joh, S.Ch.Lee, S. Perumal, J. Seo, K. Ahn, E. J. Jo, G. J. Choi, I.S. Nou, Y. Yu, T.J. Yang (2016). Genotyping by sequencing map permits identififation of clubroot resistance QTLs and revision of the reference genome assembly in cabbage (Brassica oleracea L.). DNA Research, 23(1), 29-41.
BoSF2435r	GTCTTGCACCACCGAAAGAT	2. J. Lee, N. K. Izzah, B.S. Choi, H. J. Joh, S.Ch.Lee, S. Perumal, J. Seo, K. Ahn, E. J. Jo, G. J. Choi, I.S. Nou, Y. Yu, T.J. Yang (2016). Genotyping by sequencing map permits identififation of clubroot resistance QTLs and revision of the reference genome assembly in cabbage (Brassica oleracea L.). DNA Research, 23(1), 29-41.
BoSF2447f	GTTTTCCCAGTCACGACCGAGAATCTCATCTGGCTCC	2. J. Lee, N. K. Izzah, B.S. Choi, H. J. Joh, S.Ch.Lee, S. Perumal, J. Seo, K. Ahn, E. J. Jo, G. J. Choi, I.S. Nou, Y. Yu, T.J. Yang (2016). Genotyping by sequencing map permits identififation of clubroot resistance QTLs and revision of the reference genome assembly in cabbage (Brassica oleracea L.). DNA Research, 23(1), 29-41.
BoSF2447r	TGCATGACTAATGCTTCGGA	2. J. Lee, N. K. Izzah, B.S. Choi, H. J. Joh, S.Ch.Lee, S. Perumal, J. Seo, K. Ahn, E. J. Jo, G. J. Choi, I.S. Nou, Y. Yu, T.J. Yang (2016). Genotyping by sequencing map permits identififation of clubroot resistance QTLs and revision of the reference genome assembly in cabbage (Brassica oleracea L.). DNA Research, 23(1), 29-41.
BRAS067f	GTTTTCCCAGTCACGACAATTTAAACCTCATTTTCTTC	2. J. Lee, N. K. Izzah, B.S. Choi, H. J. Joh, S.Ch.Lee, S. Perumal, J. Seo, K. Ahn, E. J. Jo, G. J. Choi, I.S. Nou, Y. Yu, T.J. Yang (2016). Genotyping by sequencing map permits identififation of clubroot resistance QTLs and revision of the reference genome assembly in cabbage (Brassica oleracea L.). DNA Research, 23(1), 29-41.
BRAS067r	ACCTCCATTGTGTCTGAT	2. J. Lee, N. K. Izzah, B.S. Choi, H. J. Joh, S.Ch.Lee, S. Perumal, J. Seo, K. Ahn, E. J. Jo, G. J. Choi, I.S. Nou, Y. Yu, T.J. Yang (2016). Genotyping by sequencing map permits identififation of clubroot resistance QTLs and revision of the reference genome assembly in cabbage (Brassica oleracea L.). DNA Research, 23(1), 29-41.
BRAS072f	GTTTTCCCAGTCACGACGCCATCTACACATTTATCCC	2. J. Lee, N. K. Izzah, B.S. Choi, H. J. Joh, S.Ch.Lee, S. Perumal, J. Seo, K. Ahn, E. J. Jo, G. J. Choi, I.S. Nou, Y. Yu, T.J. Yang (2016). Genotyping by sequencing map permits identififation of clubroot resistance QTLs and revision of the reference genome assembly in cabbage (Brassica oleracea L.). DNA Research, 23(1), 29-41.
BRAS072r	CACTAACCTTCTTGCTACCGT	2. J. Lee, N. K. Izzah, B.S. Choi, H. J. Joh, S.Ch.Lee, S. Perumal, J. Seo, K. Ahn, E. J. Jo, G. J. Choi, I.S. Nou, Y. Yu, T.J. Yang (2016). Genotyping by sequencing map permits identififation of clubroot resistance QTLs and revision of the reference genome assembly in cabbage (Brassica oleracea L.). DNA Research, 23(1), 29-41.
BRAS076f	GTTTTCCCAGTCACGACCACGCGAGGAACGATAGAGAG	2. J. Lee, N. K. Izzah, B.S. Choi, H. J. Joh, S.Ch.Lee, S. Perumal, J. Seo, K. Ahn, E. J. Jo, G. J. Choi, I.S. Nou, Y. Yu, T.J. Yang (2016). Genotyping by sequencing map permits identififation of clubroot resistance QTLs and revision of the reference genome assembly in cabbage (Brassica oleracea L.). DNA Research, 23(1), 29-41.
BRAS076r	CCGTATGCCCAAGGAAACC	2. J. Lee, N. K. Izzah, B.S. Choi, H. J. Joh, S.Ch.Lee, S. Perumal, J. Seo, K. Ahn, E. J. Jo, G. J. Choi, I.S. Nou, Y. Yu, T.J. Yang (2016). Genotyping by sequencing map permits identififation of clubroot resistance QTLs and revision of the reference genome assembly in cabbage (Brassica oleracea L.). DNA Research, 23(1), 29-41.
BrMS034f	GTTTTCCCAGTCACGACGATCAAATAACGAACGGAGA	Suwabe K., Iketani H., Nunome T., Kage T., Hirai M.(2002). Isolation and characterization of microsatellites in Brassica rapa L. Theor Appl Genet 104:1092-1098.
BrMS034r	GAGCCAAGAAAGGACCTAAG	Suwabe K., Iketani H., Nunome T., Kage T., Hirai M.(2002). Isolation and characterization of microsatellites in Brassica rapa L. Theor Appl Genet 104:1092-1098.
BnGMS160f	GTTTTCCCAGTCACGACTTTCCGAAACTTGTCGTTAT	2. J. Lee, N. K. Izzah, B.S. Choi, H. J. Joh, S.Ch.Lee, S. Perumal, J. Seo, K. Ahn, E. J. Jo, G. J. Choi, I.S. Nou, Y. Yu, T.J. Yang (2016). Genotyping by sequencing map permits identififation of clubroot resistance QTLs and revision of the reference genome assembly in cabbage (Brassica oleracea L.). DNA Research, 23(1), 29-41.
BnGMS160r	CGCTGTAAGCATTGTTGTAA	2. J. Lee, N. K. Izzah, B.S. Choi, H. J. Joh, S.Ch.Lee, S. Perumal, J. Seo, K. Ahn, E. J. Jo, G. J. Choi, I.S. Nou, Y. Yu, T.J. Yang (2016). Genotyping by sequencing map permits identififation of clubroot resistance QTLs and revision of the reference genome assembly in cabbage (Brassica oleracea L.). DNA Research, 23(1), 29-41.
BoDCTD1f	GTTTTCCCAGTCACGACAGAAAGCAGACGGGAATGG	Louarn S., Torp A.M., Holme I., Andersen S.B., Jensen B.D. (2007). Database derived microsatellite markers (SSRs) for cultivar differentation in Brassica oleracea. Genet. Resourc. Crop Evol. 54:1717-25.
BoDCTD1r	TGGTTAAAGCGAAAGTGTGC	Louarn S., Torp A.M., Holme I., Andersen S.B., Jensen B.D. (2007). Database derived microsatellite markers (SSRs) for cultivar differentation in Brassica oleracea. Genet. Resourc. Crop Evol. 54:1717-25.
CB10093f	GTTTTCCCAGTCACGACGACTTGGGAGAGATTAAACA	2. J. Lee, N. K. Izzah, B.S. Choi, H. J. Joh, S.Ch.Lee, S. Perumal, J. Seo, K. Ahn, E. J. Jo, G. J. Choi, I.S. Nou, Y. Yu, T.J. Yang (2016). Genotyping by sequencing map permits identififation of clubroot resistance QTLs and revision of the reference genome assembly in cabbage (Brassica oleracea L.). DNA Research, 23(1), 29-41.
CB10093r	GGCGATGGTGATTTCCTAGA	2. J. Lee, N. K. Izzah, B.S. Choi, H. J. Joh, S.Ch.Lee, S. Perumal, J. Seo, K. Ahn, E. J. Jo, G. J. Choi, I.S. Nou, Y. Yu, T.J. Yang (2016). Genotyping by sequencing map permits identififation of clubroot resistance QTLs and revision of the reference genome assembly in cabbage (Brassica oleracea L.). DNA Research, 23(1), 29-41.
cnu246f	GTTTTCCCAGTCACGACAAAGCCATCCATCCATCAAGC	2. J. Lee, N. K. Izzah, B.S. Choi, H. J. Joh, S.Ch.Lee, S. Perumal, J. Seo, K. Ahn, E. J. Jo, G. J. Choi, I.S. Nou, Y. Yu, T.J. Yang (2016). Genotyping by sequencing map permits identififation of clubroot resistance QTLs and revision of the reference genome assembly in cabbage (Brassica oleracea L.). DNA Research, 23(1), 29-41.
cnu246r	GATGCAACATTTGACTGTGTTAGAGC	2. J. Lee, N. K. Izzah, B.S. Choi, H. J. Joh, S.Ch.Lee, S. Perumal, J. Seo, K. Ahn, E. J. Jo, G. J. Choi, I.S. Nou, Y. Yu, T.J. Yang (2016). Genotyping by sequencing map permits identififation of clubroot resistance QTLs and revision of the reference genome assembly in cabbage (Brassica oleracea L.). DNA Research, 23(1), 29-41.
Na12-H09f	GTTTTCCCAGTCACGACAGGCGTCTATCTCGAAATGC	2. J. Lee, N. K. Izzah, B.S. Choi, H. J. Joh, S.Ch.Lee, S. Perumal, J. Seo, K. Ahn, E. J. Jo, G. J. Choi, I.S. Nou, Y. Yu, T.J. Yang (2016). Genotyping by sequencing map permits identififation of clubroot resistance QTLs and revision of the reference genome assembly in cabbage (Brassica oleracea L.). DNA Research, 23(1), 29-41.
Na12-H09r	CGTTTTTCAGAATCTCGTTGC	2. J. Lee, N. K. Izzah, B.S. Choi, H. J. Joh, S.Ch.Lee, S. Perumal, J. Seo, K. Ahn, E. J. Jo, G. J. Choi, I.S. Nou, Y. Yu, T.J. Yang (2016). Genotyping by sequencing map permits identififation of clubroot resistance QTLs and revision of the reference genome assembly in cabbage (Brassica oleracea L.). DNA Research, 23(1), 29-41.
sN0464f	GTTTTCCCAGTCACGACCCAAAGCAGGACAATCTCATC	2. J. Lee, N. K. Izzah, B.S. Choi, H. J. Joh, S.Ch.Lee, S. Perumal, J. Seo, K. Ahn, E. J. Jo, G. J. Choi, I.S. Nou, Y. Yu, T.J. Yang (2016). Genotyping by sequencing map permits identififation of clubroot resistance QTLs and revision of the reference genome assembly in cabbage (Brassica oleracea L.). DNA Research, 23(1), 29-41.
sN0464r	CCGGCTCTTGTTTTATGGTT	2. J. Lee, N. K. Izzah, B.S. Choi, H. J. Joh, S.Ch.Lee, S. Perumal, J. Seo, K. Ahn, E. J. Jo, G. J. Choi, I.S. Nou, Y. Yu, T.J. Yang (2016). Genotyping by sequencing map permits identififation of clubroot resistance QTLs and revision of the reference genome assembly in cabbage (Brassica oleracea L.). DNA Research, 23(1), 29-41.
B0902f	GTTTTCCCAGTCACGACAGCCTTGCGTAAAAGCAACTAC	3. R. Fredua-Agyeman, H. Rahman. (2016). Mapping of the clubroot disease resiatnce in spring Brassica napus canola introgressed from European winter canola cv. Mendel. Euphytica 211: 201-213.
B0902r	GTTTGGAATCCGACAAATACATCCAT	3. R. Fredua-Agyeman, H. Rahman. (2016). Mapping of the clubroot disease resiatnce in spring Brassica napus canola introgressed from European winter canola cv. Mendel. Euphytica 211: 201-213.
B0903f	GTTTTCCCAGTCACGACACTTCCTCTGCTTTTCTCAGGT	3. R. Fredua-Agyeman, H. Rahman. (2016). Mapping of the clubroot disease resiatnce in spring Brassica napus canola introgressed from European winter canola cv. Mendel. Euphytica 211: 201-213.
B0903r	GTTTGAAACTCTTCTCCCCCTTC	3. R. Fredua-Agyeman, H. Rahman. (2016). Mapping of the clubroot disease resiatnce in spring Brassica napus canola introgressed from European winter canola cv. Mendel. Euphytica 211: 201-213.
BGB36f	GTTTTCCCAGTCACGACAGCTAACATTGCAGACTTTGCT	3. R. Fredua-Agyeman, H. Rahman. (2016). Mapping of the clubroot disease resiatnce in spring Brassica napus canola introgressed from European winter canola cv. Mendel. Euphytica 211: 201-213.
BGB36r	GTTTGATAACCATGCTGTAGCGAG	3. R. Fredua-Agyeman, H. Rahman. (2016). Mapping of the clubroot disease resiatnce in spring Brassica napus canola introgressed from European winter canola cv. Mendel. Euphytica 211: 201-213.
BGB41f	GTTTTCCCAGTCACGACATCGCATAAACTAATAAAAATCAAAA	3. R. Fredua-Agyeman, H. Rahman. (2016). Mapping of the clubroot disease resiatnce in spring Brassica napus canola introgressed from European winter canola cv. Mendel. Euphytica 211: 201-213.
BGB41r	GTTTGACCCACATGATTAACAA	3. R. Fredua-Agyeman, H. Rahman. (2016). Mapping of the clubroot disease resiatnce in spring Brassica napus canola introgressed from European winter canola cv. Mendel. Euphytica 211: 201-213.
KB29N11f	GTTTTCCCAGTCACGACACTCTCCACCAACACTTCCTAA	3. R. Fredua-Agyeman, H. Rahman. (2016). Mapping of the clubroot disease resiatnce in spring Brassica napus canola introgressed from European winter canola cv. Mendel. Euphytica 211: 201-213.
KB29N11r	GTTTGAAGCTATCTTAGACCACC	3. R. Fredua-Agyeman, H. Rahman. (2016). Mapping of the clubroot disease resiatnce in spring Brassica napus canola introgressed from European winter canola cv. Mendel. Euphytica 211: 201-213.
BRMS-088f	GTTTTCCCAGTCACGACTATCGGTACTGATTCGCTCTTCAAC	4.Suwabe. Identification of two loci for resistance to clubroot (Plasmodiophora brassicae Woronin in Brassica rapa l. Theor Appl Genet 10t: 997-1002. (2003)r.
BRMS-088r	ATCGGTTGTTATTTGAGAGCAGATT	4.Suwabe. Identification of two loci for resistance to clubroot (Plasmodiophora brassicae Woronin in Brassica rapa l. Theor Appl Genet 10t: 997-1002. (2003)r.
BRMS-096f	GTTTTCCCAGTCACGACAGTCGAGATCTCGTTCGTGTCTCCC	4.Suwabe. Identification of two loci for resistance to clubroot (Plasmodiophora brassicae Woronin in Brassica rapa l. Theor Appl Genet 10t: 997-1002. (2003)r.
BRMS-096r	TGAAGAAGGATTGAAGCTGTTGTTG	4.Suwabe. Identification of two loci for resistance to clubroot (Plasmodiophora brassicae Woronin in Brassica rapa l. Theor Appl Genet 10t: 997-1002. (2003)r.
BrSTS 54f	CGTATAGACATAGAAGACATGGAAGC	Saito M., N. Kubo, S. Matsumoto, K. Suwabe, T. Tsukada, M. Hirai. (2006). Fine map ping of the clubroot resistance gene, Crr3, in Brassica rapa. Theor Appl Genet, 114: 81-91.
BrSTS 54r	GTGTTTATGCTGATTCCTTCACAG	Saito M., N. Kubo, S. Matsumoto, K. Suwabe, T. Tsukada, M. Hirai. (2006). Fine map ping of the clubroot resistance gene, Crr3, in Brassica rapa. Theor Appl Genet, 114: 81-91.
GC1250-1f	GATCTAGTTTATTATTATTATTGTATCAGG	Ueno et al. (2012) Plant Mol Biol 80: 621-629.
GC1250-1r	GAAGTTTAGGTGCACTATCCACTAAA	Ueno et al. (2012) Plant Mol Biol 80: 621-629.
Fw1f	TGAAGAATGCGGGCTACGTCCTCTGAAATC	Zhang et al. (2015)
Rw3r	GAAGTAGACAAAGACCTAGAAGATAAA	Zhang et al. (2015)
OPC11-2Sf	GTAACTTGGTACAGAACAGCATAG	Hirai M., Harada T., Kubo N., Tsukada M., Suwabe K., Matsumoto S. (2004). A novel locus for clubroot resistance in Brassica rapa and its linkage markers. Theor Appl Genet 108:639-643
OPC11-2Sr	ACTTGTCTAATGAATGATGATGG	Hirai M., Harada T., Kubo N., Tsukada M., Suwabe K., Matsumoto S. (2004). A novel locus for clubroot resistance in Brassica rapa and its linkage markers. Theor Appl Genet 108:639-643
BrSTS 44f	GAGAAGACGATTTGAAGTCGGAGT	Saito M., N. Kubo, S. Matsumoto, K. Suwabe, T. Tsukada, M. Hirai. (2006). Fine map ping of the clubroot resistance gene, Crr3, in Brassica rapa. Theor Appl Genet, 114: 81-91.
BrSTS 44r	GCTGTATCCTCCTTTTCTCAACCT	Saito M., N. Kubo, S. Matsumoto, K. Suwabe, T. Tsukada, M. Hirai. (2006). Fine map ping of the clubroot resistance gene, Crr3, in Brassica rapa. Theor Appl Genet, 114: 81-91.
M7f	CTTTCTCCGTATGAATCAGGT	J. Liu, Z. Liu, G. Fu, Ch. Wu, P.B.E. McVetty, G. Li. (2014). Fine Mapping a Clubroot Resistance Locus in Chinese Cabbage. J. Maer. Hort. Sci. 139 (3); 247-252.
M7r	CTTCTTAGTTGCTGTACGTGT	J. Liu, Z. Liu, G. Fu, Ch. Wu, P.B.E. McVetty, G. Li. (2014). Fine Mapping a Clubroot Resistance Locus in Chinese Cabbage. J. Maer. Hort. Sci. 139 (3); 247-252.
TCRO5f-Re	CGTTGGAGTACATCTGGGTGCCGAG	Saito M., N. Kubo, S. Matsumoto, K. Suwabe, T. Tsukada, M. Hirai. (2006). Fine map ping of the clubroot resistance gene, Crr3, in Brassica rapa. Theor Appl Genet, 114: 81-91.
TCRO5r-Re	GTGGGGCCAACGTACTGCAGCTAA	Saito M., N. Kubo, S. Matsumoto, K. Suwabe, T. Tsukada, M. Hirai. (2006). Fine map ping of the clubroot resistance gene, Crr3, in Brassica rapa. Theor Appl Genet, 114: 81-91.
yau376f	TGTCACCAGCGCATTATAGC	Pang W, Fu P, Li X, Zhan Z, Yu S, Piao Z. Identification and Mapping of the Clubroot Resistance Gene CRd in Chinese Cabbage (Brassica rapa ssp. pekinensis). Front Plant Sci. 2018 May 18;9:653. doi: 10.3389/fpls.2018.00653. PMID: 29868100; PMCID: PMC5968122.
yau376r	AAGGGAGGGAAGATGGGTTG	Pang W, Fu P, Li X, Zhan Z, Yu S, Piao Z. Identification and Mapping of the Clubroot Resistance Gene CRd in Chinese Cabbage (Brassica rapa ssp. pekinensis). Front Plant Sci. 2018 May 18;9:653. doi: 10.3389/fpls.2018.00653. PMID: 29868100; PMCID: PMC5968122.

## Sheet: Tab_S2
Table S2. Sequences of designed primers and their location on the reference genomes
name	sequence	Darmor-bzh 4.1	Express617	Pangenome
TD1_F1	ctgcagatttcgtgaataa	LK031800:1414582-1414600	chrA03:15624307-15624289;chrC03:27821489-27821471	scaffoldA03:15926156-15926138;scaffoldC03:24343766-24343748;westar.genome:23209026-23209008
TD1_R	tttctagagatctgccagg	LK031800:1414807-1414789	chrA03:15624082-15624100;chrC03:27820794-27820812	scaffoldA03:15925808-15925826;scaffoldC03:24343071-24343089;westar.genome:23208802-23208820
Tsc1_f	TCAATATTCAATTTTATACCCAATATC	LK031800:1412595-1412569	chrA03:15626294-15626320;chrC03:27823622-27823648	scaffoldC03:24345899-24345925;westar.genome:23211162-23211188;shengli3.genome:26705241-26705267
Tsc1_r	CTGGTGGACGCACAAGATA	LK031800:1412411-1412429	chrA03:15626478-15626460;chrC03:27823837-27823819	scaffoldA03:15928440-15928422;scaffoldC03:24346114-24346096;westar.genome:23211346-23211328;shengli3.genome:26705425-26705407
Tsc2_f	ATAAAACATCTAACCTGGATCAAC	LK031800:1409380-1409357	chrA03:15629509-15629532;chrC03:27826849-27826872	scaffoldA03:15923787-15923810;scaffoldC03:24349126-24349149;tapidor3.genome:31418367-31418390;quintaA.genome:9426100-9426123;shengli3.genome:26725676-26725699
Tsc2_r	TGTGGAAGCCACACTGGTT	LK031800:1409180-1409198	chrA03:15629709-15629691;chrC03:27827056-27827038	scaffoldA03:15923994-15923976;scaffoldC03:24349333-24349315;tapidor3.genome:31418531-31418513;quintaA.genome:9426307-9426289;shengli3.genome:26725892-26725874
Tsc3_f	TTCCTCTCCCACACCGTA	LK031800:1406995-1406978	chrA03:15631897-15631914;chrC03:27829336-27829353	scaffoldA03:15934097-15934114;scaffoldC03:24351613-24351630;zheyou73.genome:35615550-35615567
Tsc3_r	ATGTCTTATAAATATGTGAGCTC	LK031800:1406527-1406549	chrA03:15632365-15632343;chrC03:27829805-27829783	scaffoldA03:15934611-15934589;scaffoldC03:24352082-24352060;zheyou73.genome:35616018-35615996;quintaA.genome:9429106-9429084
Tsc4_f	ACTCGGTTGATGTCGTTATCA	LK031800:1400298-1400278	chrA03:15638595-15638615;chrC03:27836226-27836246	scaffoldA03:15941078-15941098;scaffoldC03:24358503-24358523
Tsc4_r	CAATAGTTAATGTGAGCGCAA	LK031800:1397661-1397681	chrA03:15641232-15641212	scaffoldA03:15948322-15948306
Tsc6_f	GAGGACGCAAGTTTCA	LK031800:1366038-1366023;LK031800:1366136-1366121	chrA03:15713916-15713931;chrA03:15713916-15713931	scaffoldA03:16022072-16022087;scaffoldC03:24469944-24469959;ganganF73.genome:32771645-32771631
Tsc6_r	AGAAATGTCATGGAATATCTC	LK031800:1365915-1365935	chrA03:15714039-15714019	scaffoldA03:16022193-16022175;ganganF73.genome:32771520-32771536
Tsc7_f	TTTGATTTTCCAGATAATTG	LK033659:32239-32258	chrA03:15676837-15676856;chrC03:27899471-27899490	scaffoldA03:15988479-15988498;scaffoldC03:24430014-24430033;tapidor3.genome:31432373-31432392
Tsc7_r	AAGATTACCATGCATGAGT	LK033659:32361-32343	chrA03:15676959-15676941	scaffoldA03:15988600-15988582;tapidor3.genome:31432946-31432928

## Sheet: Tab_S3
Table S3. Summary statistics of the Disease Index from seven batches and BLUP-DI
Series	min	max	mean	median	Q1	Q3	var	sd	LOOH2	ΔH2
1	0	90.48	30.65	36.67	0	55.56	833.54	28.87	0.696266	0.0332076
2	0	100	46.86	57.14	0	83.33	1601.51	40.019	0.652333	0.077141
3	0	50	13.13	6.67	0	26.67	233.7	15.29	0.792397	-0.0629235
4	0	66.67	18.83	16.67	6.19	33.33	227.613	15.07	0.764687	-0.0352128
5	0	93.33	44.55	58.33	0	66.67	1048.35	32.38	0.729789	-0.000314838
6	0	100	38.26	40	0	73.33	1266.34	35.59	0.745849	-0.0163747
7	0	100	63.69	100	13.33	100	1935.98	43	0.523903	0.20557
BLUP-DI	-10.56	75.041	33.29	41.87	7.91	52.55	570.46	23.88

## Sheet: Tab_S4
Table S4. Genetic map statistics
linkage_group	n_bins	total_length (cM)	avg_spacing (cM)	max_spacing (cM)
chrC01	138	117.8	0.9	7.8
chrA07	140	108.2	0.8	10.1
chrC04	115	176.9	1.6	10.7
chrA06	108	135.9	1.3	21
chrA03	98	79.8	0.8	18.7
chrC07	93	99.7	1.1	14.8
chrC02	87	122.6	1.4	27.1
chrA05	86	110	1.3	15.8
chrC05	83	127.2	1.6	15.5
chrA01	68	137.4	2.1	22.4
chrA08	67	64.7	1	5.1
chrC06	62	99.8	1.6	20.3
chrC03	61	117.1	2	37.2
chrA10	44	76.8	1.8	33
chrA02	39	88.8	2.3	24.6
chrA09	36	74.6	2.1	15.4
chrC08	36	56.8	1.6	13.1
chrC09	28	49.9	1.8	19.2
chrA04	17	22.2	1.4	7.2
overall	1406	1866.1	1.3	37.2

## Sheet: Tab_S5
Table S5. Genetic map and QTL Mapping results
marker	chr	cM	bin	lod	r2	eff
Bn-A01-p1250595	chrA01	0	832	0.0124084	0.000228544	1.41411
Bn-A01-p1275284	chrA01	0.71	833	0.0251278	0.000462763	1.27196
Bn-A01-p1276486	chrA01	0.71	833	0.0251278	0.000462763	1.27196
Bn-A01-p1276504	chrA01	0.71	833	0.0251278	0.000462763	1.27196
Bn-A01-p1314194	chrA01	0.71	833	0.0251278	0.000462763	1.27196
Bn-A01-p1314440	chrA01	0.71	833	0.0251278	0.000462763	1.27196
Bn-A01-p1320368	chrA01	0.71	833	0.0251278	0.000462763	1.27196
Bn-A01-p1247899	chrA01	1.1	834	0.0265708	0.000489333	1.51185
Bn-A01-p1249847	chrA01	1.1	834	0.0265708	0.000489333	1.51185
Bn-A01-p1152123	chrA01	1.9	835	0.063304	0.00116542	1.43461
Bn-A01-p1152359	chrA01	1.9	835	0.063304	0.00116542	1.43461
Bn-A01-p1152369	chrA01	1.9	835	0.063304	0.00116542	1.43461
Bn-A01-p1067371	chrA01	2.7	836	0.0756294	0.00139218	2.18648
Bn-A01-p951063	chrA01	4.32	837	0.13319	0.00245045	0.531691
Bn-A01-p975213	chrA01	4.32	837	0.13319	0.00245045	0.531691
Bn-A01-p933795	chrA01	4.71	838	0.0911478	0.0016776	0.89787
Bn-A01-p939202	chrA01	4.71	838	0.0911478	0.0016776	0.89787
Bn-A01-p866260	chrA01	5.11	839	0.0675822	0.00124414	1.33754
Bn-A01-p820317	chrA01	5.91	840	0.040606	0.000747711	0.70193
Bn-A01-p648196	chrA01	6.68	841	0.0245908	0.000452876	0.0472208
Bn-A01-p100441	chrA01	13.46	842	0.00809188	0.000149047	2.7505
Bn-A01-p100693	chrA01	13.46	842	0.00809188	0.000149047	2.7505
Bn-A01-p101094	chrA01	13.46	842	0.00809188	0.000149047	2.7505
Bn-A01-p101451	chrA01	13.46	842	0.00809188	0.000149047	2.7505
Bn-A01-p101879	chrA01	13.46	842	0.00809188	0.000149047	2.7505
Bn-A01-p101943	chrA01	13.46	842	0.00809188	0.000149047	2.7505
Bn-A01-p102158	chrA01	13.46	842	0.00809188	0.000149047	2.7505
Bn-A01-p102187	chrA01	13.46	842	0.00809188	0.000149047	2.7505
Bn-A01-p102249	chrA01	13.46	842	0.00809188	0.000149047	2.7505
Bn-A01-p108136	chrA01	13.46	842	0.00809188	0.000149047	2.7505
Bn-A01-p108225	chrA01	13.46	842	0.00809188	0.000149047	2.7505
Bn-A01-p11933	chrA01	13.46	842	0.00809188	0.000149047	2.7505
Bn-A01-p120225	chrA01	13.46	842	0.00809188	0.000149047	2.7505
Bn-A01-p146963	chrA01	13.46	842	0.00809188	0.000149047	2.7505
Bn-A01-p147360	chrA01	13.46	842	0.00809188	0.000149047	2.7505
Bn-A01-p147990	chrA01	13.46	842	0.00809188	0.000149047	2.7505
Bn-A01-p150028	chrA01	13.46	842	0.00809188	0.000149047	2.7505
Bn-A01-p161237	chrA01	13.46	842	0.00809188	0.000149047	2.7505
Bn-A01-p176052	chrA01	13.46	842	0.00809188	0.000149047	2.7505
Bn-A01-p178709	chrA01	13.46	842	0.00809188	0.000149047	2.7505
Bn-A01-p206610	chrA01	13.46	842	0.00809188	0.000149047	2.7505
Bn-A01-p207363	chrA01	13.46	842	0.00809188	0.000149047	2.7505
Bn-A01-p5512	chrA01	13.46	842	0.00809188	0.000149047	2.7505
Bn-A01-p6239	chrA01	13.46	842	0.00809188	0.000149047	2.7505
Bn-A01-p71129	chrA01	13.46	842	0.00809188	0.000149047	2.7505
Bn-A01-p80385	chrA01	13.46	842	0.00809188	0.000149047	2.7505
Bn-A01-p88608	chrA01	13.46	842	0.00809188	0.000149047	2.7505
Bn-A01-p89956	chrA01	13.46	842	0.00809188	0.000149047	2.7505
Bn-A01-p95718	chrA01	13.46	842	0.00809188	0.000149047	2.7505
Bn-A01-p97663	chrA01	13.46	842	0.00809188	0.000149047	2.7505
Bn-A10-p4840892	chrA01	13.46	842	0.00809188	0.000149047	2.7505
Bn-A01-p515600	chrA01	14.23	843	0.0365421	0.000672904	2.62191
Bn-A01-p595651	chrA01	14.63	844	0.0214357	0.000394781	2.46442
Bn-A01-p598242	chrA01	14.63	844	0.0214357	0.000394781	2.46442
Bn-A01-p599910	chrA01	14.63	844	0.0214357	0.000394781	2.46442
Bn-A01-p609857	chrA01	14.63	844	0.0214357	0.000394781	2.46442
Bn-A01-p611977	chrA01	14.63	844	0.0214357	0.000394781	2.46442
Bn-A01-p637586	chrA01	14.63	844	0.0214357	0.000394781	2.46442
Bn-A01-p663088	chrA01	15.02	845	0.0208252	0.00038354	2.88504
Bn-A01-p737560	chrA01	15.42	846	0.0378159	0.000696352	3.17642
Bn-A01-p739098	chrA01	15.42	846	0.0378159	0.000696352	3.17642
Bn-A01-p777123	chrA01	15.42	846	0.0378159	0.000696352	3.17642
Bn-A01-p778048	chrA01	15.42	846	0.0378159	0.000696352	3.17642
Bn-A01-p821328	chrA01	15.42	846	0.0378159	0.000696352	3.17642
Bn-A01-p830221	chrA01	15.42	846	0.0378159	0.000696352	3.17642
Bn-A01-p849125	chrA01	15.42	846	0.0378159	0.000696352	3.17642
Bn-scaff_20461_1-p169329	chrA01	15.42	846	0.0378159	0.000696352	3.17642
Bn-A01-p872436	chrA01	16.22	847	0.0662082	0.00121886	3.84252
Bn-A01-p877322	chrA01	16.22	847	0.0662082	0.00121886	3.84252
Bn-A01-p878256	chrA01	16.22	847	0.0662082	0.00121886	3.84252
Bn-A01-p879755	chrA01	16.22	847	0.0662082	0.00121886	3.84252
Bn-A01-p887815	chrA01	16.22	847	0.0662082	0.00121886	3.84252
Bn-scaff_15838_1-p517875	chrA01	16.22	847	0.0662082	0.00121886	3.84252
Bn-A01-p912298	chrA01	16.62	848	0.090952	0.001674	3.369
Bn-A01-p916774	chrA01	16.62	848	0.090952	0.001674	3.369
Bn-A01-p916852	chrA01	16.62	848	0.090952	0.001674	3.369
Bn-A01-p938887	chrA01	16.62	848	0.090952	0.001674	3.369
Bn-A01-p1000115	chrA01	18.24	849	0.108134	0.00198991	4.09426
Bn-scaff_15838_1-p694016	chrA01	18.24	849	0.108134	0.00198991	4.09426
Bn-A01-p1095733	chrA01	18.63	850	0.074027	0.0013627	4.70409
Bn-A01-p1148760	chrA01	18.63	850	0.074027	0.0013627	4.70409
Bn-A01-p1149698	chrA01	19.03	851	0.0781965	0.00143939	4.20052
Bn-A01-p1156081	chrA01	19.83	852	0.0660163	0.00121532	3.43506
Bn-A01-p1187868	chrA01	20.12	853	0.0275544	0.000507442	3.92327
Bn-A01-p1188004	chrA01	20.12	853	0.0275544	0.000507442	3.92327
Bn-A01-p1188928	chrA01	20.12	853	0.0275544	0.000507442	3.92327
Bn-A01-p1190844	chrA01	20.12	853	0.0275544	0.000507442	3.92327
Bn-A01-p1192928	chrA01	20.12	853	0.0275544	0.000507442	3.92327
Bn-A01-p1226475	chrA01	20.12	853	0.0275544	0.000507442	3.92327
Bn-A01-p1227023	chrA01	20.12	853	0.0275544	0.000507442	3.92327
Bn-A01-p1235334	chrA01	20.12	853	0.0275544	0.000507442	3.92327
Bn-A01-p1236927	chrA01	20.12	853	0.0275544	0.000507442	3.92327
Bn-scaff_19193_1-p657373	chrA01	42.55	854	0.0254344	0.000468409	2.8056
Bn-scaff_19193_1-p657997	chrA01	43.14	855	0.0424277	0.000781242	2.83783
Bn-scaff_19193_1-p658050	chrA01	43.14	855	0.0424277	0.000781242	2.83783
Bn-A01-p4246586	chrA01	44.25	856	0.01491	0.000274615	3.11154
Bn-A01-p4177941	chrA01	44.64	857	0.00916878	0.000168881	3.43921
Bn-A01-p4188629	chrA01	44.64	857	0.00916878	0.000168881	3.43921
Bn-A01-p4227703	chrA01	44.64	857	0.00916878	0.000168881	3.43921
Bn-A01-p4233306	chrA01	44.64	857	0.00916878	0.000168881	3.43921
Bn-A01-p4235273	chrA01	44.64	857	0.00916878	0.000168881	3.43921
Bn-A01-p4242269	chrA01	44.64	857	0.00916878	0.000168881	3.43921
Bn-A01-p4284958	chrA01	44.64	857	0.00916878	0.000168881	3.43921
Bn-A01-p4293847	chrA01	44.64	857	0.00916878	0.000168881	3.43921
Bn-A01-p4293878	chrA01	44.64	857	0.00916878	0.000168881	3.43921
Bn-A01-p4303527	chrA01	44.64	857	0.00916878	0.000168881	3.43921
Bn-A01-p4311134	chrA01	44.64	857	0.00916878	0.000168881	3.43921
Bn-A01-p4322340	chrA01	44.64	857	0.00916878	0.000168881	3.43921
Bn-A01-p4354753	chrA01	44.64	857	0.00916878	0.000168881	3.43921
Bn-scaff_19193_1-p618891	chrA01	44.64	857	0.00916878	0.000168881	3.43921
Bn-A01-p4549564	chrA01	45.01	858	0.00663331	0.000122183	3.7861
Bn-A01-p5265598	chrA01	50.96	859	0.337069	0.00618981	1.49836
Bn-A01-p5269368	chrA01	50.96	859	0.337069	0.00618981	1.49836
Bn-A01-p5469727	chrA01	52.97	860	0.406629	0.0074624	1.03061
Bn-A01-p5480514	chrA01	53.38	861	0.407985	0.0074872	0.601522
Bn-A01-p5480517	chrA01	53.38	861	0.407985	0.0074872	0.601522
Bn-A01-p5508840	chrA01	53.38	861	0.407985	0.0074872	0.601522
Bn-A01-p5522403	chrA01	53.38	861	0.407985	0.0074872	0.601522
Bn-A01-p5522870	chrA01	53.38	861	0.407985	0.0074872	0.601522
Bn-A01-p5536695	chrA01	53.38	861	0.407985	0.0074872	0.601522
Bn-A01-p5550226	chrA01	53.38	861	0.407985	0.0074872	0.601522
Bn-A01-p5567077	chrA01	53.38	861	0.407985	0.0074872	0.601522
Bn-A01-p5567840	chrA01	53.38	861	0.407985	0.0074872	0.601522
Bn-A01-p5570110	chrA01	53.38	861	0.407985	0.0074872	0.601522
Bn-A01-p5570221	chrA01	53.38	861	0.407985	0.0074872	0.601522
Bn-A01-p5585071	chrA01	53.38	861	0.407985	0.0074872	0.601522
Bn-A01-p5585933	chrA01	53.38	861	0.407985	0.0074872	0.601522
Bn-A01-p5586618	chrA01	53.38	861	0.407985	0.0074872	0.601522
Bn-A01-p5586671	chrA01	53.38	861	0.407985	0.0074872	0.601522
Bn-A01-p5586854	chrA01	53.38	861	0.407985	0.0074872	0.601522
Bn-A01-p5587840	chrA01	53.38	861	0.407985	0.0074872	0.601522
Bn-A01-p5590998	chrA01	53.38	861	0.407985	0.0074872	0.601522
Bn-A01-p5595319	chrA01	53.38	861	0.407985	0.0074872	0.601522
Bn-A01-p5599369	chrA01	53.38	861	0.407985	0.0074872	0.601522
Bn-A01-p5601232	chrA01	53.38	861	0.407985	0.0074872	0.601522
Bn-A01-p5635471	chrA01	53.38	861	0.407985	0.0074872	0.601522
Bn-A01-p5647795	chrA01	53.38	861	0.407985	0.0074872	0.601522
Bn-A01-p5648120	chrA01	53.38	861	0.407985	0.0074872	0.601522
Bn-A01-p5658004	chrA01	53.38	861	0.407985	0.0074872	0.601522
Bn-A01-p5715141	chrA01	53.38	861	0.407985	0.0074872	0.601522
Bn-A01-p5718049	chrA01	53.38	861	0.407985	0.0074872	0.601522
Bn-A01-p5730640	chrA01	53.38	861	0.407985	0.0074872	0.601522
Bn-A01-p5731429	chrA01	53.38	861	0.407985	0.0074872	0.601522
Bn-A01-p5731932	chrA01	53.38	861	0.407985	0.0074872	0.601522
Bn-A01-p5732226	chrA01	53.38	861	0.407985	0.0074872	0.601522
Bn-A01-p5737901	chrA01	53.38	861	0.407985	0.0074872	0.601522
Bn-A01-p5752342	chrA01	53.38	861	0.407985	0.0074872	0.601522
Bn-A01-p5822015	chrA01	53.38	861	0.407985	0.0074872	0.601522
Bn-scaff_17827_1-p329960	chrA01	53.38	861	0.407985	0.0074872	0.601522
Bn-A01-p5959700	chrA01	60.07	862	0.371684	0.0068233	-1.86852
Bn-A01-p6478922	chrA01	61.39	863	0.198497	0.00364977	-0.775211
Bn-A01-p6479735	chrA01	61.39	863	0.198497	0.00364977	-0.775211
Bn-A01-p6482543	chrA01	61.39	863	0.198497	0.00364977	-0.775211
Bn-A01-p6487075	chrA01	61.39	863	0.198497	0.00364977	-0.775211
Bn-A01-p6604419	chrA01	62.16	864	0.205401	0.00377648	-1.2901
Bn-A01-p6643749	chrA01	69.43	865	0.398075	0.007306	0.336186
Bn-A01-p8150111	chrA01	77.66	866	0.567502	0.0103993	-3.13817
Bn-A01-p9227229	chrA01	79.24	867	0.85713	0.0156649	-3.14138
Bn-A01-p9254925	chrA01	79.24	867	0.85713	0.0156649	-3.14138
Bn-A01-p9256011	chrA01	79.24	867	0.85713	0.0156649	-3.14138
Bn-A01-p9258144	chrA01	79.24	867	0.85713	0.0156649	-3.14138
Bn-A01-p9259611	chrA01	79.24	867	0.85713	0.0156649	-3.14138
Bn-A01-p9260073	chrA01	79.24	867	0.85713	0.0156649	-3.14138
Bn-A01-p9269627	chrA01	79.24	867	0.85713	0.0156649	-3.14138
Bn-A01-p9408018	chrA01	80.44	868	0.96008	0.0175299	-4.27681
Bn-A01-p9442471	chrA01	80.44	868	0.96008	0.0175299	-4.27681
Bn-A01-p9445754	chrA01	80.44	868	0.96008	0.0175299	-4.27681
BrE0015.398	chrA01	80.44	868	0.96008	0.0175299	-4.27681
Bn-A01-p10249225	chrA01	83.32	869	0.894549	0.0163432	-3.5112
Bn-A01-p10250255	chrA01	83.32	869	0.894549	0.0163432	-3.5112
Bn-A01-p10251052	chrA01	83.32	869	0.894549	0.0163432	-3.5112
Bn-A01-p10257919	chrA01	83.32	869	0.894549	0.0163432	-3.5112
Bn-scaff_15747_1-p397566	chrA01	83.32	869	0.894549	0.0163432	-3.5112
Bn-A01-p10268662	chrA01	83.7	870	0.710366	0.0130002	-3.64049
Bn-A01-p10278752	chrA01	83.7	870	0.710366	0.0130002	-3.64049
Bn-A01-p10285074	chrA01	83.7	870	0.710366	0.0130002	-3.64049
Bn-scaff_15747_1-p462246	chrA01	83.7	870	0.710366	0.0130002	-3.64049
Bn-A01-p10611800	chrA01	84.1	871	0.861081	0.0157366	-3.9725
Bn-A01-p10636637	chrA01	84.1	871	0.861081	0.0157366	-3.9725
Bn-A01-p10640881	chrA01	84.1	871	0.861081	0.0157366	-3.9725
Bn-A01-p10641656	chrA01	84.1	871	0.861081	0.0157366	-3.9725
Bn-A01-p10693617	chrA01	84.1	871	0.861081	0.0157366	-3.9725
Bn-A01-p10693623	chrA01	84.1	871	0.861081	0.0157366	-3.9725
Bn-A01-p10720611	chrA01	84.1	871	0.861081	0.0157366	-3.9725
Bn-A01-p10740084	chrA01	84.1	871	0.861081	0.0157366	-3.9725
Bn-A01-p10835605	chrA01	84.1	871	0.861081	0.0157366	-3.9725
Bn-A01-p10838493	chrA01	84.1	871	0.861081	0.0157366	-3.9725
Bn-A01-p10859527	chrA01	84.1	871	0.861081	0.0157366	-3.9725
Bn-A01-p10916044	chrA01	84.1	871	0.861081	0.0157366	-3.9725
Bn-A01-p11011196	chrA01	84.1	871	0.861081	0.0157366	-3.9725
Bn-A01-p11052248	chrA01	84.1	871	0.861081	0.0157366	-3.9725
Bn-A01-p11054015	chrA01	84.1	871	0.861081	0.0157366	-3.9725
Bn-A01-p11077627	chrA01	84.1	871	0.861081	0.0157366	-3.9725
Bn-A01-p11078406	chrA01	84.1	871	0.861081	0.0157366	-3.9725
Bn-A01-p11091663	chrA01	84.1	871	0.861081	0.0157366	-3.9725
Bn-A01-p11091816	chrA01	84.1	871	0.861081	0.0157366	-3.9725
Bn-A01-p10398937	chrA01	90.01	872	0.554082	0.0101547	-4.52099
Bn-A01-p10406165	chrA01	90.01	872	0.554082	0.0101547	-4.52099
Bn-scaff_15747_1-p649039	chrA01	90.01	872	0.554082	0.0101547	-4.52099
Bn-A01-p9333956	chrA01	93.62	873	0.662856	0.012136	-4.87197
Bn-A01-p9337252	chrA01	93.62	873	0.662856	0.012136	-4.87197
Bn-A01-p9499100	chrA01	93.62	873	0.662856	0.012136	-4.87197
BrE0015.410	chrA01	93.62	873	0.662856	0.012136	-4.87197
Bn-A01-p9614730	chrA01	94.36	874	0.72536	0.0132728	-4.2335
Bn-A01-p9621623	chrA01	94.75	875	0.531493	0.00974269	-4.21843
Bn-scaff_19614_1-p106170	chrA01	95.96	876	0.691332	0.0126541	-3.98273
Bn-A01-p10344498	chrA01	96.76	877	0.437993	0.00803567	-4.18769
Bn-A01-p10346546	chrA01	96.76	877	0.437993	0.00803567	-4.18769
Bn-A01-p10354645	chrA01	96.76	877	0.437993	0.00803567	-4.18769
Bn-A01-p11120493	chrA01	97.56	878	0.451616	0.00828457	-4.7866
Bn-A01-p11137395	chrA01	97.56	878	0.451616	0.00828457	-4.7866
Bn-A01-p11142752	chrA01	97.56	878	0.451616	0.00828457	-4.7866
Bn-A01-p11163785	chrA01	97.95	879	0.392859	0.00721061	-4.8944
Bn-A01-p11163980	chrA01	97.95	879	0.392859	0.00721061	-4.8944
Bn-A01-p11174997	chrA01	97.95	879	0.392859	0.00721061	-4.8944
Bn-A01-p11206467	chrA01	97.95	879	0.392859	0.00721061	-4.8944
Bn-A01-p11238778	chrA01	97.95	879	0.392859	0.00721061	-4.8944
Bn-A01-p17015383	chrA01	100.41	880	0.636956	0.0116646	-5.08304
Bn-A01-p17036109	chrA01	100.41	880	0.636956	0.0116646	-5.08304
Bn-A01-p17040457	chrA01	100.41	880	0.636956	0.0116646	-5.08304
Bn-A01-p17049439	chrA01	100.41	880	0.636956	0.0116646	-5.08304
Bn-A01-p17050461	chrA01	100.41	880	0.636956	0.0116646	-5.08304
Bn-A01-p17187327	chrA01	100.41	880	0.636956	0.0116646	-5.08304
Bn-A01-p17216088	chrA01	100.41	880	0.636956	0.0116646	-5.08304
Bn-A01-p17216237	chrA01	100.41	880	0.636956	0.0116646	-5.08304
Bn-A01-p17271891	chrA01	100.41	880	0.636956	0.0116646	-5.08304
Bn-A01-p17278340	chrA01	100.41	880	0.636956	0.0116646	-5.08304
Bn-A01-p17295156	chrA01	100.41	880	0.636956	0.0116646	-5.08304
Bn-A01-p17296147	chrA01	100.41	880	0.636956	0.0116646	-5.08304
Bn-A01-p17315519	chrA01	101.17	881	0.808169	0.0147768	-4.95754
Bn-A01-p17492348	chrA01	101.17	881	0.808169	0.0147768	-4.95754
Bn-A01-p17494364	chrA01	101.17	881	0.808169	0.0147768	-4.95754
Bn-A01-p17548227	chrA01	101.17	881	0.808169	0.0147768	-4.95754
Bn-A01-p17555906	chrA01	101.17	881	0.808169	0.0147768	-4.95754
Bn-A01-p17574483	chrA01	101.17	881	0.808169	0.0147768	-4.95754
Bn-A01-p17577426	chrA01	101.17	881	0.808169	0.0147768	-4.95754
Bn-A01-p17577903	chrA01	101.17	881	0.808169	0.0147768	-4.95754
Bn-A01-p17578169	chrA01	101.17	881	0.808169	0.0147768	-4.95754
Bn-A01-p18072231	chrA01	101.17	881	0.808169	0.0147768	-4.95754
Bn-A01-p18084128	chrA01	101.17	881	0.808169	0.0147768	-4.95754
Bn-A01-p18091225	chrA01	101.17	881	0.808169	0.0147768	-4.95754
Bn-A01-p18091559	chrA01	101.17	881	0.808169	0.0147768	-4.95754
Bn-A01-p18091996	chrA01	101.17	881	0.808169	0.0147768	-4.95754
Bn-A01-p18102632	chrA01	101.17	881	0.808169	0.0147768	-4.95754
Bn-A01-p18102711	chrA01	101.17	881	0.808169	0.0147768	-4.95754
Bn-A01-p18121827	chrA01	101.17	881	0.808169	0.0147768	-4.95754
Bn-A01-p17105194	chrA01	107.09	882	1.19707	0.0218095	-4.40334
Bn-A01-p17118647	chrA01	107.09	882	1.19707	0.0218095	-4.40334
Bn-A01-p17118839	chrA01	107.09	882	1.19707	0.0218095	-4.40334
Bn-A01-p17121291	chrA01	107.09	882	1.19707	0.0218095	-4.40334
Bn-A01-p17121775	chrA01	107.09	882	1.19707	0.0218095	-4.40334
Bn-A01-p17121894	chrA01	107.09	882	1.19707	0.0218095	-4.40334
Bn-A01-p17124831	chrA01	107.09	882	1.19707	0.0218095	-4.40334
Bn-A01-p17129906	chrA01	107.09	882	1.19707	0.0218095	-4.40334
Bn-A01-p17136539	chrA01	107.09	882	1.19707	0.0218095	-4.40334
Bn-A01-p17137863	chrA01	107.09	882	1.19707	0.0218095	-4.40334
Bn-A01-p17150604	chrA01	107.09	882	1.19707	0.0218095	-4.40334
Bn-A01-p17156534	chrA01	107.09	882	1.19707	0.0218095	-4.40334
Bn-A01-p17157752	chrA01	107.09	882	1.19707	0.0218095	-4.40334
Bn-A01-p17159109	chrA01	107.09	882	1.19707	0.0218095	-4.40334
Bn-A01-p17160355	chrA01	107.09	882	1.19707	0.0218095	-4.40334
Bn-A01-p17165052	chrA01	107.09	882	1.19707	0.0218095	-4.40334
Bn-A01-p17165303	chrA01	107.09	882	1.19707	0.0218095	-4.40334
Bn-A01-p17174111	chrA01	107.09	882	1.19707	0.0218095	-4.40334
Bn-A01-p18327940	chrA01	107.09	882	1.19707	0.0218095	-4.40334
Bn-A01-p18329609	chrA01	107.09	882	1.19707	0.0218095	-4.40334
Bn-A01-p18329689	chrA01	107.09	882	1.19707	0.0218095	-4.40334
Bn-A01-p18329796	chrA01	107.09	882	1.19707	0.0218095	-4.40334
Bn-A01-p18330598	chrA01	107.09	882	1.19707	0.0218095	-4.40334
Bn-A01-p18367467	chrA01	107.09	882	1.19707	0.0218095	-4.40334
Bn-A01-p19447794	chrA01	107.89	883	1.07219	0.0195566	-4.62586
Bn-A01-p19617963	chrA01	107.89	883	1.07219	0.0195566	-4.62586
Bn-A01-p19623880	chrA01	107.89	883	1.07219	0.0195566	-4.62586
Bn-A01-p19623985	chrA01	107.89	883	1.07219	0.0195566	-4.62586
Bn-A01-p19624123	chrA01	107.89	883	1.07219	0.0195566	-4.62586
Bn-A01-p19624216	chrA01	107.89	883	1.07219	0.0195566	-4.62586
Bn-A01-p19661033	chrA01	107.89	883	1.07219	0.0195566	-4.62586
Bn-A01-p19700004	chrA01	107.89	883	1.07219	0.0195566	-4.62586
Bn-A01-p19762477	chrA01	107.89	883	1.07219	0.0195566	-4.62586
Bn-A01-p19764240	chrA01	107.89	883	1.07219	0.0195566	-4.62586
Bn-A01-p19803988	chrA01	107.89	883	1.07219	0.0195566	-4.62586
Bn-A01-p19813138	chrA01	107.89	883	1.07219	0.0195566	-4.62586
Bn-A01-p19855343	chrA01	107.89	883	1.07219	0.0195566	-4.62586
Bn-A01-p19931030	chrA01	107.89	883	1.07219	0.0195566	-4.62586
Bn-A01-p19931596	chrA01	107.89	883	1.07219	0.0195566	-4.62586
Bn-A01-p19946190	chrA01	107.89	883	1.07219	0.0195566	-4.62586
Bn-A01-p19955264	chrA01	107.89	883	1.07219	0.0195566	-4.62586
Bn-A01-p19961176	chrA01	107.89	883	1.07219	0.0195566	-4.62586
Bn-A01-p20836664	chrA01	108.69	884	1.01705	0.0185603	-3.76219
Bn-A01-p20866022	chrA01	108.69	884	1.01705	0.0185603	-3.76219
Bn-A01-p20988977	chrA01	109.42	885	0.883287	0.0161391	-4.22729
Bn-A01-p21018746	chrA01	109.42	885	0.883287	0.0161391	-4.22729
Bn-A01-p21038677	chrA01	109.42	885	0.883287	0.0161391	-4.22729
Bn-A01-p21079129	chrA01	109.42	885	0.883287	0.0161391	-4.22729
Bn-A01-p21079348	chrA01	109.42	885	0.883287	0.0161391	-4.22729
Bn-A01-p21079774	chrA01	109.42	885	0.883287	0.0161391	-4.22729
Bn-A01-p21079909	chrA01	109.42	885	0.883287	0.0161391	-4.22729
Bn-scaff_15879_1-p403913	chrA01	109.42	885	0.883287	0.0161391	-4.22729
Bn-scaff_15879_1-p426186	chrA01	109.42	885	0.883287	0.0161391	-4.22729
Bn-A01-p27107081	chrA01	125.13	886	0.562766	0.010313	-3.37087
Bn-scaff_16691_1-p1402284	chrA01	125.13	886	0.562766	0.010313	-3.37087
Bn-Scaffold000164-p242428	chrA01	136.65	887	0.481344	0.0088275	-2.71783
Bn-scaff_16567_1-p114222	chrA01	137.39	888	0.340882	0.00625961	-2.85904
Bn-Scaffold000164-p283953	chrA01	137.39	888	0.340882	0.00625961	-2.85904
Bn-A02-p26013503	chrA02	0	1099	0.0501506	0.000923381	0.965355
Bn-A02-p25881408	chrA02	0.71	1100	0.0392946	0.000723572	0.668215
Bn-A02-p25820450	chrA02	1.1	1101	0.0310687	0.000572143	0.354488
Bn-A02-p25826690	chrA02	1.1	1101	0.0310687	0.000572143	0.354488
Bn-A02-p25827208	chrA02	1.1	1101	0.0310687	0.000572143	0.354488
Bn-A02-p25841382	chrA02	1.1	1101	0.0310687	0.000572143	0.354488
Bn-A02-p25400515	chrA02	1.5	1102	0.0158026	0.000291052	0.487407
Bn-A02-p25400591	chrA02	1.5	1102	0.0158026	0.000291052	0.487407
Bn-A02-p25457045	chrA02	1.5	1102	0.0158026	0.000291052	0.487407
Bn-A02-p25188041	chrA02	2.29	1103	0.0420948	0.000775113	1.15691
Bn-A02-p25190854	chrA02	2.29	1103	0.0420948	0.000775113	1.15691
Bn-A02-p25201372	chrA02	2.29	1103	0.0420948	0.000775113	1.15691
Bn-A02-p25205468	chrA02	2.29	1103	0.0420948	0.000775113	1.15691
Bn-A02-p25206495	chrA02	2.29	1103	0.0420948	0.000775113	1.15691
Bn-A02-p25206605	chrA02	2.29	1103	0.0420948	0.000775113	1.15691
Bn-A02-p25218817	chrA02	2.29	1103	0.0420948	0.000775113	1.15691
Bn-A02-p25260066	chrA02	2.29	1103	0.0420948	0.000775113	1.15691
Bn-A02-p25286373	chrA02	2.29	1103	0.0420948	0.000775113	1.15691
Bn-A02-p25367886	chrA02	2.29	1103	0.0420948	0.000775113	1.15691
Bn-A02-p25375825	chrA02	2.29	1103	0.0420948	0.000775113	1.15691
Bn-scaff_17721_1-p221100	chrA02	2.29	1103	0.0420948	0.000775113	1.15691
Bn-A02-p24731379	chrA02	4.33	1104	0.242559	0.00445814	0.98371
Bn-scaff_17623_1-p120681	chrA02	4.72	1105	0.260882	0.0047941	1.58002
Bn-scaff_17623_1-p120748	chrA02	4.72	1105	0.260882	0.0047941	1.58002
Bn-A02-p13067449	chrA02	29.35	1106	0.303345	0.00557223	-0.447011
Bn-A02-p13068355	chrA02	29.35	1106	0.303345	0.00557223	-0.447011
Bn-A02-p13118529	chrA02	29.35	1106	0.303345	0.00557223	-0.447011
Bn-A02-p13121161	chrA02	29.35	1106	0.303345	0.00557223	-0.447011
Bn-A02-p13123802	chrA02	29.35	1106	0.303345	0.00557223	-0.447011
Bn-A02-p13124058	chrA02	29.35	1106	0.303345	0.00557223	-0.447011
Bn-A02-p13130726	chrA02	29.35	1106	0.303345	0.00557223	-0.447011
Bn-A02-p13197154	chrA02	29.35	1106	0.303345	0.00557223	-0.447011
Bn-A02-p13212386	chrA02	29.35	1106	0.303345	0.00557223	-0.447011
Bn-A02-p12815817	chrA02	30.15	1107	0.195127	0.00358792	0.104243
Bn-A02-p12819772	chrA02	30.15	1107	0.195127	0.00358792	0.104243
Bn-A02-p12822311	chrA02	30.15	1107	0.195127	0.00358792	0.104243
Bn-A03-p31160337	chrA02	30.15	1107	0.195127	0.00358792	0.104243
Bn-scaff_20735_1-p4627	chrA02	30.15	1107	0.195127	0.00358792	0.104243
Bn-A02-p11896294	chrA02	30.95	1108	0.27514	0.00505544	1.10006
Bn-A02-p11896538	chrA02	30.95	1108	0.27514	0.00505544	1.10006
Bn-A02-p11906704	chrA02	30.95	1108	0.27514	0.00505544	1.10006
Bn-A02-p11909870	chrA02	30.95	1108	0.27514	0.00505544	1.10006
Bn-A02-p11929538	chrA02	30.95	1108	0.27514	0.00505544	1.10006
Bn-A02-p11935002	chrA02	30.95	1108	0.27514	0.00505544	1.10006
Bn-A02-p11960741	chrA02	30.95	1108	0.27514	0.00505544	1.10006
Bn-A02-p11961581	chrA02	30.95	1108	0.27514	0.00505544	1.10006
Bn-A02-p12003125	chrA02	30.95	1108	0.27514	0.00505544	1.10006
Bn-A02-p12003217	chrA02	30.95	1108	0.27514	0.00505544	1.10006
Bn-A02-p12028821	chrA02	30.95	1108	0.27514	0.00505544	1.10006
Bn-A02-p12061350	chrA02	30.95	1108	0.27514	0.00505544	1.10006
Bn-A02-p12105374	chrA02	30.95	1108	0.27514	0.00505544	1.10006
Bn-A02-p12107746	chrA02	30.95	1108	0.27514	0.00505544	1.10006
Bn-A02-p12107868	chrA02	30.95	1108	0.27514	0.00505544	1.10006
Bn-A02-p12145607	chrA02	30.95	1108	0.27514	0.00505544	1.10006
Bn-scaff_17566_1-p13661	chrA02	30.95	1108	0.27514	0.00505544	1.10006
Bn-A02-p11284285	chrA02	31.75	1109	0.135467	0.00249228	0.684824
Bn-A02-p11284503	chrA02	31.75	1109	0.135467	0.00249228	0.684824
Bn-A02-p11355276	chrA02	31.75	1109	0.135467	0.00249228	0.684824
Bn-A02-p11449488	chrA02	31.75	1109	0.135467	0.00249228	0.684824
Bn-A02-p11450032	chrA02	31.75	1109	0.135467	0.00249228	0.684824
Bn-A02-p11451035	chrA02	31.75	1109	0.135467	0.00249228	0.684824
Bn-A02-p11451261	chrA02	31.75	1109	0.135467	0.00249228	0.684824
Bn-A02-p11454010	chrA02	31.75	1109	0.135467	0.00249228	0.684824
Bn-A02-p11454573	chrA02	31.75	1109	0.135467	0.00249228	0.684824
Bn-A02-p11454658	chrA02	31.75	1109	0.135467	0.00249228	0.684824
Bn-A02-p11455310	chrA02	31.75	1109	0.135467	0.00249228	0.684824
Bn-A02-p11457727	chrA02	31.75	1109	0.135467	0.00249228	0.684824
Bn-A02-p11463288	chrA02	31.75	1109	0.135467	0.00249228	0.684824
Bn-A02-p11492320	chrA02	31.75	1109	0.135467	0.00249228	0.684824
Bn-A02-p10996151	chrA02	32.55	1110	0.148293	0.00272793	1.72493
Bn-A02-p11014885	chrA02	32.55	1110	0.148293	0.00272793	1.72493
Bn-A02-p11153317	chrA02	32.55	1110	0.148293	0.00272793	1.72493
Bn-A02-p10524842	chrA02	33.28	1111	0.0937551	0.00172554	0.910037
Bn-A02-p10527075	chrA02	33.28	1111	0.0937551	0.00172554	0.910037
Bn-A02-p10528586	chrA02	33.28	1111	0.0937551	0.00172554	0.910037
Bn-A02-p10530978	chrA02	33.28	1111	0.0937551	0.00172554	0.910037
Bn-A02-p10533300	chrA02	33.28	1111	0.0937551	0.00172554	0.910037
Bn-A02-p10540148	chrA02	33.28	1111	0.0937551	0.00172554	0.910037
Bn-A02-p10556758	chrA02	33.28	1111	0.0937551	0.00172554	0.910037
Bn-A02-p10625720	chrA02	33.28	1111	0.0937551	0.00172554	0.910037
Bn-A02-p10690394	chrA02	33.28	1111	0.0937551	0.00172554	0.910037
Bn-A02-p10690477	chrA02	33.28	1111	0.0937551	0.00172554	0.910037
Bn-A02-p6182038	chrA02	48.47	1112	0.264142	0.00485386	1.25474
Bn-A02-p6202881	chrA02	48.47	1112	0.264142	0.00485386	1.25474
Bn-A02-p6206785	chrA02	48.47	1112	0.264142	0.00485386	1.25474
Bn-A02-p6209563	chrA02	48.47	1112	0.264142	0.00485386	1.25474
Bn-A02-p6244013	chrA02	48.47	1112	0.264142	0.00485386	1.25474
Bn-A02-p4345046	chrA02	59.97	1113	0.0923672	0.00170002	-1.01694
Bn-A02-p4352396	chrA02	59.97	1113	0.0923672	0.00170002	-1.01694
Bn-A02-p4277649	chrA02	61.12	1114	0.137908	0.00253714	-0.338781
Bn-A02-p4290375	chrA02	61.12	1114	0.137908	0.00253714	-0.338781
Bn-A02-p4298976	chrA02	61.12	1114	0.137908	0.00253714	-0.338781
Bn-A02-p4299085	chrA02	61.12	1114	0.137908	0.00253714	-0.338781
Bn-A02-p4299411	chrA02	61.12	1114	0.137908	0.00253714	-0.338781
Bn-A02-p4259381	chrA02	61.52	1115	0.107763	0.00198311	-0.120921
Bn-A02-p4262796	chrA02	61.52	1115	0.107763	0.00198311	-0.120921
Bn-A02-p4262907	chrA02	61.52	1115	0.107763	0.00198311	-0.120921
Bn-scaff_15714_1-p592895	chrA02	62.32	1116	0.0835015	0.00153697	0.112982
Bn-scaff_23799_1-p6782	chrA02	62.32	1116	0.0835015	0.00153697	0.112982
Bn-A02-p4035808	chrA02	62.69	1117	0.067378	0.00124038	0.55559
Bn-A02-p4037028	chrA02	62.69	1117	0.067378	0.00124038	0.55559
Bn-A02-p4038224	chrA02	62.69	1117	0.067378	0.00124038	0.55559
Bn-A02-p4044933	chrA02	62.69	1117	0.067378	0.00124038	0.55559
Bn-A02-p4102727	chrA02	62.69	1117	0.067378	0.00124038	0.55559
Bn-A02-p4103543	chrA02	62.69	1117	0.067378	0.00124038	0.55559
Bn-A02-p4104054	chrA02	62.69	1117	0.067378	0.00124038	0.55559
Bn-scaff_15714_1-p615978	chrA02	62.69	1117	0.067378	0.00124038	0.55559
Bn-A02-p3558502	chrA02	67.74	1118	0.0163008	0.000300226	1.16507
Bn-A02-p3571230	chrA02	67.74	1118	0.0163008	0.000300226	1.16507
Bn-A02-p3374678	chrA02	70.17	1119	0.077952	0.0014349	0.30251
Bn-A02-p3214095	chrA02	72.2	1120	0.00809248	0.000149058	1.09742
Bn-A02-p3214903	chrA02	72.2	1120	0.00809248	0.000149058	1.09742
Bn-A02-p3221634	chrA02	72.2	1120	0.00809248	0.000149058	1.09742
Bn-A02-p3233816	chrA02	72.2	1120	0.00809248	0.000149058	1.09742
Bn-A02-p3281338	chrA02	72.2	1120	0.00809248	0.000149058	1.09742
Bn-A02-p3281452	chrA02	72.2	1120	0.00809248	0.000149058	1.09742
Bn-A02-p3035603	chrA02	72.98	1121	0.00353842	6.5178e-05	1.69041
Bn-A02-p3074016	chrA02	72.98	1121	0.00353842	6.5178e-05	1.69041
Bn-A02-p2776432	chrA02	75.43	1122	0.0013381	2.46484e-05	1.86352
Bn-A02-p2784335	chrA02	75.43	1122	0.0013381	2.46484e-05	1.86352
Bn-A02-p2785185	chrA02	75.43	1122	0.0013381	2.46484e-05	1.86352
Bn-A02-p2799146	chrA02	75.43	1122	0.0013381	2.46484e-05	1.86352
Bn-A02-p2800579	chrA02	75.43	1122	0.0013381	2.46484e-05	1.86352
Bn-A02-p1173704	chrA02	78.3	1123	0.00610851	0.000112517	3.1424
Bn-A02-p1220275	chrA02	79.08	1124	0.000118874	2.18975e-06	3.01031
Bn-A02-p1232964	chrA02	79.08	1124	0.000118874	2.18975e-06	3.01031
Bn-A02-p1290847	chrA02	80.7	1125	0.00320443	5.90261e-05	2.21106
Bn-scaff_15714_1-p2723978	chrA02	80.7	1125	0.00320443	5.90261e-05	2.21106
Bn-A02-p2642904	chrA02	81.5	1126	0.00820953	0.000151214	1.43069
Bn-A02-p2643078	chrA02	81.5	1126	0.00820953	0.000151214	1.43069
Bn-A02-p2654991	chrA02	81.5	1126	0.00820953	0.000151214	1.43069
Bn-A02-p2692116	chrA02	81.5	1126	0.00820953	0.000151214	1.43069
Bn-A02-p2698217	chrA02	81.5	1126	0.00820953	0.000151214	1.43069
Bn-A02-p2707979	chrA02	81.5	1126	0.00820953	0.000151214	1.43069
Bn-A02-p2708161	chrA02	81.5	1126	0.00820953	0.000151214	1.43069
Bn-A02-p2549141	chrA02	83.12	1127	0.0375824	0.000692054	1.44032
Bn-A02-p2490293	chrA02	83.51	1128	0.00952095	0.000175367	1.32334
Bn-A02-p2502950	chrA02	83.51	1128	0.00952095	0.000175367	1.32334
Bn-A02-p2443019	chrA02	85.12	1129	0.0225946	0.000416121	0.494241
Bn-A02-p2443275	chrA02	85.12	1129	0.0225946	0.000416121	0.494241
Bn-A02-p2451470	chrA02	85.12	1129	0.0225946	0.000416121	0.494241
Bn-A02-p2475208	chrA02	85.12	1129	0.0225946	0.000416121	0.494241
Bn-A02-p2105937	chrA02	87.57	1130	0.0334911	0.000616739	1.38116
Bn-A02-p2182742	chrA02	87.57	1130	0.0334911	0.000616739	1.38116
Bn-A02-p2287712	chrA02	87.57	1130	0.0334911	0.000616739	1.38116
Bn-A02-p1402685	chrA02	88.77	1131	0.0361156	0.000665053	2.49238
Bn-A02-p1411508	chrA02	88.77	1131	0.0361156	0.000665053	2.49238
Bn-A02-p1788566	chrA02	88.77	1131	0.0361156	0.000665053	2.49238
Bn-A03-p11613865	chrA03	0	431	35.7404	0.482301	-35.2094
Bn-A03-p11617534	chrA03	0	431	35.7404	0.482301	-35.2094
Bn-A03-p11626015	chrA03	0	431	35.7404	0.482301	-35.2094
Bn-A03-p11626279	chrA03	0	431	35.7404	0.482301	-35.2094
Bn-A03-p11655433	chrA03	0	431	35.7404	0.482301	-35.2094
Bn-A03-p11656333	chrA03	0	431	35.7404	0.482301	-35.2094
Bn-A03-p11704125	chrA03	0	431	35.7404	0.482301	-35.2094
Bn-A03-p11704711	chrA03	0	431	35.7404	0.482301	-35.2094
Bn-A03-p11751694	chrA03	0	431	35.7404	0.482301	-35.2094
Bn-A03-p11792328	chrA03	0	431	35.7404	0.482301	-35.2094
Bn-A03-p11798309	chrA03	0	431	35.7404	0.482301	-35.2094
Bn-scaff_16352_1-p100761	chrA03	0	431	35.7404	0.482301	-35.2094
Bn-A03-p12065947	chrA03	0.8	432	38.6247	0.50909	-36.1724
Bn-A03-p12076661	chrA03	0.8	432	38.6247	0.50909	-36.1724
Bn-A03-p12186958	chrA03	1.6	433	41.1296	0.531226	-36.7333
Bn-A03-p12201775	chrA03	1.6	433	41.1296	0.531226	-36.7333
Bn-A03-p12250401	chrA03	2	434	41.2159	0.531971	-36.6555
Bn-A03-p12279241	chrA03	2	434	41.2159	0.531971	-36.6555
Bn-A03-p12286718	chrA03	2	434	41.2159	0.531971	-36.6555
Bn-A03-p12342812	chrA03	2.4	435	43.1571	0.548411	-37.1164
Bn-A03-p12343742	chrA03	2.4	435	43.1571	0.548411	-37.1164
Bn-scaff_15782_1-p38010	chrA03	2.8	436	43.2814	0.549444	-37.0539
Bn-A03-p12353218	chrA03	3.19	437	45.3499	0.566288	-37.7161
Bn-A03-p12353370	chrA03	3.19	437	45.3499	0.566288	-37.7161
Bn-A03-p12359936	chrA03	3.19	437	45.3499	0.566288	-37.7161
Bn-A03-p12393626	chrA03	3.19	437	45.3499	0.566288	-37.7161
Bn-A03-p12411362	chrA03	3.19	437	45.3499	0.566288	-37.7161
Bn-A03-p12426461	chrA03	3.19	437	45.3499	0.566288	-37.7161
Bn-A03-p12429205	chrA03	3.19	437	45.3499	0.566288	-37.7161
Bn-A03-p12431376	chrA03	3.19	437	45.3499	0.566288	-37.7161
Bn-A03-p12453877	chrA03	3.19	437	45.3499	0.566288	-37.7161
Bn-A03-p12457385	chrA03	3.19	437	45.3499	0.566288	-37.7161
Bn-A03-p12482349	chrA03	3.19	437	45.3499	0.566288	-37.7161
Bn-A03-p12541207	chrA03	3.19	437	45.3499	0.566288	-37.7161
Bn-A03-p12628781	chrA03	3.59	438	47.351	0.581985	-38.1361
Bn-A03-p12638944	chrA03	3.59	438	47.351	0.581985	-38.1361
Bn-A03-p12783093	chrA03	3.59	438	47.351	0.581985	-38.1361
Bn-A03-p12784925	chrA03	3.59	438	47.351	0.581985	-38.1361
Bn-scaff_20646_1-p675326	chrA03	3.59	438	47.351	0.581985	-38.1361
Bn-scaff_20646_1-p677020	chrA03	3.59	438	47.351	0.581985	-38.1361
Bn-A03-p12869911	chrA03	4.4	439	51.0964	0.609853	-39.0376
Bn-A03-p13291935	chrA03	4.4	439	51.0964	0.609853	-39.0376
Bn-scaff_20646_1-p348861	chrA03	4.4	439	51.0964	0.609853	-39.0376
Bn-A03-p12973462	chrA03	4.79	440	52.554	0.620188	-39.2663
Bn-A03-p13286574	chrA03	5.19	441	54.5965	0.634213	-39.6102
Bn-A03-p13287670	chrA03	5.19	441	54.5965	0.634213	-39.6102
Bn-scaff_27881_1-p14038	chrA03	5.19	441	54.5965	0.634213	-39.6102
Bn-scaff_27881_1-p15080	chrA03	5.19	441	54.5965	0.634213	-39.6102
Bn-scaff_27881_1-p15401	chrA03	5.19	441	54.5965	0.634213	-39.6102
Bn-A03-p13440035	chrA03	5.59	442	56.9998	0.650053	-40.2002
Bn-A03-p13514947	chrA03	5.99	443	59.2716	0.664396	-40.54
Bn-A03-p13523343	chrA03	5.99	443	59.2716	0.664396	-40.54
Bn-A03-p13545223	chrA03	5.99	443	59.2716	0.664396	-40.54
Bn-A03-p13567559	chrA03	5.99	443	59.2716	0.664396	-40.54
Bn-A03-p13585261	chrA03	5.99	443	59.2716	0.664396	-40.54
Bn-A03-p13630048	chrA03	5.99	443	59.2716	0.664396	-40.54
Bn-A03-p13640859	chrA03	5.99	443	59.2716	0.664396	-40.54
Bn-A03-p13653603	chrA03	5.99	443	59.2716	0.664396	-40.54
Bn-A03-p13678735	chrA03	5.99	443	59.2716	0.664396	-40.54
Bn-scaff_28509_1-p22130	chrA03	5.99	443	59.2716	0.664396	-40.54
Bn-A03-p13755726	chrA03	6.39	444	61.3623	0.677075	-40.8291
Bn-A03-p13758392	chrA03	6.39	444	61.3623	0.677075	-40.8291
Bn-A03-p13778786	chrA03	6.39	444	61.3623	0.677075	-40.8291
Bn-A03-p13814543	chrA03	6.39	444	61.3623	0.677075	-40.8291
Bn-A03-p13853558	chrA03	6.39	444	61.3623	0.677075	-40.8291
Bn-A03-p13861749	chrA03	6.39	444	61.3623	0.677075	-40.8291
Bn-A03-p13906492	chrA03	6.39	444	61.3623	0.677075	-40.8291
Bn-A03-p13908787	chrA03	6.39	444	61.3623	0.677075	-40.8291
Bn-A03-p13975945	chrA03	6.39	444	61.3623	0.677075	-40.8291
Bn-A03-p14003701	chrA03	6.39	444	61.3623	0.677075	-40.8291
Bn-A03-p14041361	chrA03	6.39	444	61.3623	0.677075	-40.8291
Bn-A07-p6044939	chrA03	6.39	444	61.3623	0.677075	-40.8291
Bn-A03-p14092692	chrA03	6.78	445	64.7822	0.696791	-41.5176
Bn-A03-p14127649	chrA03	7.18	446	66.9951	0.708902	-41.7777
Bn-A03-p14153306	chrA03	7.18	446	66.9951	0.708902	-41.7777
Bn-A03-p14153376	chrA03	7.18	446	66.9951	0.708902	-41.7777
Bn-A03-p14154555	chrA03	7.18	446	66.9951	0.708902	-41.7777
Bn-A03-p14154912	chrA03	7.18	446	66.9951	0.708902	-41.7777
Bn-A03-p14155274	chrA03	7.18	446	66.9951	0.708902	-41.7777
Bn-A03-p14291952	chrA03	7.58	447	68.2204	0.715399	-42.0695
Bn-A03-p14330609	chrA03	7.58	447	68.2204	0.715399	-42.0695
Bn-A03-p14385006	chrA03	7.58	447	68.2204	0.715399	-42.0695
Bn-A03-p14387177	chrA03	7.58	447	68.2204	0.715399	-42.0695
Bn-A03-p14402509	chrA03	7.58	447	68.2204	0.715399	-42.0695
Bn-A03-p14413451	chrA03	7.58	447	68.2204	0.715399	-42.0695
Bn-A03-p14418650	chrA03	7.58	447	68.2204	0.715399	-42.0695
Bn-A03-p14423477	chrA03	7.58	447	68.2204	0.715399	-42.0695
Bn-A03-p14434665	chrA03	7.58	447	68.2204	0.715399	-42.0695
Bn-A03-p14462148	chrA03	7.58	447	68.2204	0.715399	-42.0695
Bn-A03-p14462570	chrA03	7.58	447	68.2204	0.715399	-42.0695
Bn-A03-p14473296	chrA03	7.58	447	68.2204	0.715399	-42.0695
Bn-A03-p14474478	chrA03	7.58	447	68.2204	0.715399	-42.0695
Bn-scaff_18482_1-p445207	chrA03	7.58	447	68.2204	0.715399	-42.0695
Bn-scaff_18482_1-p447039	chrA03	7.58	447	68.2204	0.715399	-42.0695
Bn-A03-p14552086	chrA03	8.79	448	78.7967	0.765779	-43.4227
Bn-A03-p14583041	chrA03	9.59	449	84.6141	0.78958	-43.8892
Bn-A03-p14585799	chrA03	9.59	449	84.6141	0.78958	-43.8892
Bn-A03-p14598476	chrA03	9.59	449	84.6141	0.78958	-43.8892
Bn-A03-p14611641	chrA03	9.59	449	84.6141	0.78958	-43.8892
Bn-A03-p14685500	chrA03	9.59	449	84.6141	0.78958	-43.8892
Bn-A03-p14710981	chrA03	9.59	449	84.6141	0.78958	-43.8892
Bn-A03-p14735831	chrA03	9.59	449	84.6141	0.78958	-43.8892
Bn-A03-p14736161	chrA03	9.59	449	84.6141	0.78958	-43.8892
Bn-A03-p14742926	chrA03	9.59	449	84.6141	0.78958	-43.8892
Bn-A03-p14759764	chrA03	9.59	449	84.6141	0.78958	-43.8892
Bn-scaff_22751_1-p137904	chrA03	9.59	449	84.6141	0.78958	-43.8892
Bn-A03-p14811204	chrA03	9.98	450	90.153	0.80999	-44.3588
Bn-A03-p14848117	chrA03	9.98	450	90.153	0.80999	-44.3588
Bn-A03-p14885241	chrA03	9.98	450	90.153	0.80999	-44.3588
Bn-A03-p14888403	chrA03	9.98	450	90.153	0.80999	-44.3588
Bn-A03-p14927037	chrA03	10.38	451	93.2861	0.820646	-44.558
Bn-A03-p14968153	chrA03	11.18	452	104.212	0.853344	-45.2587
Bn-A03-p15004059	chrA03	11.58	453	112.121	0.873226	-45.6962
BrSTS78	chrA03	11.58	453	112.121	0.873226	-45.6962
yau376	chrA03	11.58	453	112.121	0.873226	-45.6962
Bn-A03-p15102212	chrA03	11.98	454	116.092	0.882168	-45.8499
Bn-A03-p15139190	chrA03	11.98	454	116.092	0.882168	-45.8499
Bn-A03-p15174986	chrA03	11.98	454	116.092	0.882168	-45.8499
Bn-A03-p15184379	chrA03	11.98	454	116.092	0.882168	-45.8499
Bn-scaff_17521_1-p1327223	chrA03	11.98	454	116.092	0.882168	-45.8499
Bn-scaff_17521_1-p1338444	chrA03	11.98	454	116.092	0.882168	-45.8499
Tsc1	chrA03	11.98	454	116.092	0.882168	-45.8499
Bn-A03-p15200901	chrA03	12.38	455	111.279	0.871244	-45.6455
Bn-A03-p15201279	chrA03	12.38	455	111.279	0.871244	-45.6455
Bn-A03-p15237693	chrA03	12.38	455	111.279	0.871244	-45.6455
Bn-A03-p15240794	chrA03	12.38	455	111.279	0.871244	-45.6455
Bn-A03-p15245600	chrA03	12.38	455	111.279	0.871244	-45.6455
Bn-A03-p15265791	chrA03	12.38	455	111.279	0.871244	-45.6455
Bn-A03-p15300653	chrA03	12.38	455	111.279	0.871244	-45.6455
BrSTS54	chrA03	12.38	455	111.279	0.871244	-45.6455
Tsc6	chrA03	12.38	455	111.279	0.871244	-45.6455
Bn-A03-p15365259	chrA03	12.78	456	107.564	0.862125	-45.326
Bn-A03-p15404736	chrA03	13.17	457	100.325	0.842456	-44.885
Bn-A03-p15405498	chrA03	13.17	457	100.325	0.842456	-44.885
Bn-A03-p15416728	chrA03	13.17	457	100.325	0.842456	-44.885
Bn-scaff_17521_1-p970336	chrA03	13.17	457	100.325	0.842456	-44.885
Bn-A03-p15424536	chrA03	13.57	458	95.6467	0.828278	-44.4274
Bn-A03-p15435114	chrA03	13.57	458	95.6467	0.828278	-44.4274
Bn-A03-p15435174	chrA03	13.57	458	95.6467	0.828278	-44.4274
Bn-A03-p15481682	chrA03	13.57	458	95.6467	0.828278	-44.4274
Bn-A03-p15496608	chrA03	13.57	458	95.6467	0.828278	-44.4274
Bn-A03-p15496962	chrA03	13.57	458	95.6467	0.828278	-44.4274
Bn-A03-p15546590	chrA03	13.57	458	95.6467	0.828278	-44.4274
Bn-A03-p15577849	chrA03	13.97	459	91.9031	0.816018	-44.1759
Bn-A03-p15593483	chrA03	13.97	459	91.9031	0.816018	-44.1759
Bn-A03-p15615278	chrA03	13.97	459	91.9031	0.816018	-44.1759
Bn-A03-p15622267	chrA03	13.97	459	91.9031	0.816018	-44.1759
Bn-A03-p15624030	chrA03	13.97	459	91.9031	0.816018	-44.1759
Bn-A03-p15624379	chrA03	13.97	459	91.9031	0.816018	-44.1759
Bn-A03-p15627698	chrA03	13.97	459	91.9031	0.816018	-44.1759
Bn-A03-p15634432	chrA03	13.97	459	91.9031	0.816018	-44.1759
Bn-A03-p15708289	chrA03	14.77	460	88.2205	0.803104	-43.8249
Bn-A03-p15744983	chrA03	15.17	461	83.7701	0.786283	-43.2865
Bn-A03-p15852439	chrA03	15.57	462	80.8036	0.77428	-43.0311
Bn-A03-p15916054	chrA03	15.57	462	80.8036	0.77428	-43.0311
Bn-A03-p15916258	chrA03	15.57	462	80.8036	0.77428	-43.0311
Bn-A03-p15923626	chrA03	15.57	462	80.8036	0.77428	-43.0311
Bn-A03-p15974991	chrA03	15.57	462	80.8036	0.77428	-43.0311
Bn-scaff_17521_1-p464847	chrA03	15.57	462	80.8036	0.77428	-43.0311
Bn-A03-p16017186	chrA03	16.37	463	71.5507	0.732333	-41.7048
Bn-A03-p16051661	chrA03	16.37	463	71.5507	0.732333	-41.7048
Bn-A03-p16056039	chrA03	16.37	463	71.5507	0.732333	-41.7048
Bn-A03-p16056249	chrA03	16.37	463	71.5507	0.732333	-41.7048
Bn-A03-p16190643	chrA03	16.77	464	69.9986	0.72457	-41.5525
Bn-A03-p16211692	chrA03	16.77	464	69.9986	0.72457	-41.5525
Bn-A03-p16229294	chrA03	16.77	464	69.9986	0.72457	-41.5525
Bn-A03-p16262184	chrA03	16.77	464	69.9986	0.72457	-41.5525
Bn-A03-p16269745	chrA03	16.77	464	69.9986	0.72457	-41.5525
Bn-A03-p16275650	chrA03	16.77	464	69.9986	0.72457	-41.5525
Bn-A03-p16278251	chrA03	16.77	464	69.9986	0.72457	-41.5525
Bn-A03-p16405269	chrA03	17.17	465	67.2105	0.710055	-41.0647
Bn-A03-p16409353	chrA03	17.17	465	67.2105	0.710055	-41.0647
Bn-A03-p16416948	chrA03	17.17	465	67.2105	0.710055	-41.0647
Bn-A03-p16431100	chrA03	17.56	466	65.0016	0.698014	-40.7839
Bn-A03-p16437979	chrA03	17.56	466	65.0016	0.698014	-40.7839
Bn-A03-p16444510	chrA03	17.56	466	65.0016	0.698014	-40.7839
Bn-A03-p16454331	chrA03	17.56	466	65.0016	0.698014	-40.7839
Bn-A03-p16481995	chrA03	17.96	467	62.7966	0.685495	-40.348
Bn-A03-p16501946	chrA03	18.36	468	61.8338	0.679867	-40.1168
Bn-A03-p16530135	chrA03	18.36	468	61.8338	0.679867	-40.1168
Bn-A03-p16611349	chrA03	18.76	469	58.3739	0.6588	-39.5555
Bn-scaff_17298_1-p928410	chrA03	18.76	469	58.3739	0.6588	-39.5555
Bn-A03-p16742011	chrA03	19.97	470	51.8524	0.615248	-38.1635
Bn-A03-p16759411	chrA03	19.97	470	51.8524	0.615248	-38.1635
Bn-A03-p16852209	chrA03	19.97	470	51.8524	0.615248	-38.1635
Bn-scaff_17298_1-p1173360	chrA03	19.97	470	51.8524	0.615248	-38.1635
Bn-scaff_17298_1-p1174018	chrA03	19.97	470	51.8524	0.615248	-38.1635
Bn-A03-p16955732	chrA03	20.36	471	50.7572	0.607407	-37.8618
Bn-A03-p16969084	chrA03	20.36	471	50.7572	0.607407	-37.8618
Bn-A03-p16989353	chrA03	20.36	471	50.7572	0.607407	-37.8618
Bn-A03-p17038064	chrA03	20.36	471	50.7572	0.607407	-37.8618
Bn-A03-p17038965	chrA03	20.36	471	50.7572	0.607407	-37.8618
Bn-A03-p17056395	chrA03	20.36	471	50.7572	0.607407	-37.8618
Bn-scaff_17298_1-p1520465	chrA03	20.36	471	50.7572	0.607407	-37.8618
Bn-scaff_17298_1-p1744778	chrA03	20.36	471	50.7572	0.607407	-37.8618
Bn-A03-p17184441	chrA03	21.98	472	45.2222	0.565267	-36.416
Bn-A03-p17281617	chrA03	22.37	473	45.2163	0.56522	-36.4145
Bn-A03-p17782292	chrA03	23.18	474	41.8309	0.537244	-35.5032
Bn-A03-p17921239	chrA03	23.18	474	41.8309	0.537244	-35.5032
Bn-A03-p17926123	chrA03	23.18	474	41.8309	0.537244	-35.5032
Bn-scaff_20103_1-p142790	chrA03	23.18	474	41.8309	0.537244	-35.5032
Bn-A03-p18014273	chrA03	23.57	475	40.1476	0.52267	-35.068
Bn-A03-p18376493	chrA03	24.78	476	37.4591	0.498435	-34.1073
Bn-A03-p18414643	chrA03	24.78	476	37.4591	0.498435	-34.1073
Bn-A03-p18455020	chrA03	24.78	476	37.4591	0.498435	-34.1073
Bn-A03-p18455932	chrA03	24.78	476	37.4591	0.498435	-34.1073
Bn-A03-p18461597	chrA03	24.78	476	37.4591	0.498435	-34.1073
Bn-A03-p18461778	chrA03	24.78	476	37.4591	0.498435	-34.1073
Bn-A03-p18462261	chrA03	24.78	476	37.4591	0.498435	-34.1073
Bn-A03-p18468633	chrA03	24.78	476	37.4591	0.498435	-34.1073
Bn-A03-p18471820	chrA03	24.78	476	37.4591	0.498435	-34.1073
Bn-A03-p18570046	chrA03	24.78	476	37.4591	0.498435	-34.1073
Bn-A03-p18594273	chrA03	25.18	477	36.2197	0.486852	-33.667
Bn-A03-p18618117	chrA03	25.58	478	35.4343	0.479375	-33.3689
Bn-A03-p18618990	chrA03	25.58	478	35.4343	0.479375	-33.3689
Bn-A03-p18764384	chrA03	25.58	478	35.4343	0.479375	-33.3689
Bn-scaff_20079_1-p58991	chrA03	25.58	478	35.4343	0.479375	-33.3689
Bn-A03-p19045801	chrA03	25.97	479	34.251	0.467902	-32.9329
Bn-A03-p19047537	chrA03	25.97	479	34.251	0.467902	-32.9329
Bn-A03-p19078721	chrA03	26.37	480	33.4631	0.460122	-32.6923
Bn-A03-p19129006	chrA03	26.37	480	33.4631	0.460122	-32.6923
Bn-A03-p19160298	chrA03	26.37	480	33.4631	0.460122	-32.6923
Bn-A03-p19166062	chrA03	26.37	480	33.4631	0.460122	-32.6923
Bn-A03-p19189483	chrA03	26.37	480	33.4631	0.460122	-32.6923
Bn-A03-p19198939	chrA03	26.77	481	32.6774	0.452252	-32.4486
Bn-A03-p19243266	chrA03	26.77	481	32.6774	0.452252	-32.4486
Bn-A03-p19254792	chrA03	27.17	482	31.1348	0.436464	-31.9156
Bn-A03-p19274997	chrA03	27.17	482	31.1348	0.436464	-31.9156
Bn-scaff_21261_1-p117005	chrA03	27.17	482	31.1348	0.436464	-31.9156
BrG3080	chrA03	27.17	482	31.1348	0.436464	-31.9156
Bn-A03-p19380485	chrA03	27.57	483	30.2985	0.427716	-31.5561
Bn-A03-p19380801	chrA03	27.57	483	30.2985	0.427716	-31.5561
Bn-A03-p19510486	chrA03	27.97	484	29.3027	0.417121	-31.1273
Bn-scaff_16141_1-p55687	chrA03	27.97	484	29.3027	0.417121	-31.1273
Bn-A03-p19519674	chrA03	28.36	485	29.087	0.4148	-31.0758
Bn-A03-p19527199	chrA03	28.36	485	29.087	0.4148	-31.0758
Bn-A03-p19536775	chrA03	28.36	485	29.087	0.4148	-31.0758
Bn-A03-p19573902	chrA03	28.76	486	28.3279	0.40656	-30.7312
Bn-A03-p19582066	chrA03	28.76	486	28.3279	0.40656	-30.7312
Bn-A03-p19727558	chrA03	29.56	487	27.0303	0.392204	-30.1209
Bn-A03-p19766214	chrA03	29.96	488	26.3282	0.384292	-29.787
Bn-A03-p19768447	chrA03	29.96	488	26.3282	0.384292	-29.787
Bn-A03-p19769998	chrA03	29.96	488	26.3282	0.384292	-29.787
Bn-A03-p19776651	chrA03	29.96	488	26.3282	0.384292	-29.787
Bn-A03-p19806018	chrA03	29.96	488	26.3282	0.384292	-29.787
Bn-A03-p19844661	chrA03	29.96	488	26.3282	0.384292	-29.787
Bn-A03-p19850198	chrA03	29.96	488	26.3282	0.384292	-29.787
Bn-A03-p19851089	chrA03	29.96	488	26.3282	0.384292	-29.787
Bn-A03-p19868485	chrA03	29.96	488	26.3282	0.384292	-29.787
Bn-scaff_18917_1-p286901	chrA03	29.96	488	26.3282	0.384292	-29.787
Bn-A03-p19874058	chrA03	30.36	489	25.8999	0.379416	-29.5717
Bn-A03-p19880918	chrA03	30.36	489	25.8999	0.379416	-29.5717
Bn-A03-p19896843	chrA03	30.36	489	25.8999	0.379416	-29.5717
Bn-A03-p19897251	chrA03	30.36	489	25.8999	0.379416	-29.5717
Bn-A03-p19935973	chrA03	30.36	489	25.8999	0.379416	-29.5717
Bn-A03-p19942172	chrA03	30.36	489	25.8999	0.379416	-29.5717
Bn-A03-p19951011	chrA03	30.36	489	25.8999	0.379416	-29.5717
Bn-A03-p19953514	chrA03	30.36	489	25.8999	0.379416	-29.5717
Bn-A03-p19973423	chrA03	30.76	490	24.8738	0.367574	-29.1319
Bn-A03-p20080800	chrA03	31.15	491	24.0911	0.35839	-28.7939
Bn-A03-p20086767	chrA03	31.15	491	24.0911	0.35839	-28.7939
Bn-A03-p20125361	chrA03	31.15	491	24.0911	0.35839	-28.7939
Bn-A03-p20145024	chrA03	31.15	491	24.0911	0.35839	-28.7939
Bn-A03-p20164751	chrA03	31.15	491	24.0911	0.35839	-28.7939
Bn-A03-p20369417	chrA03	32.77	492	21.6208	0.328519	-27.5685
Bn-A03-p20369521	chrA03	32.77	492	21.6208	0.328519	-27.5685
Bn-A03-p20395531	chrA03	32.77	492	21.6208	0.328519	-27.5685
Bn-A03-p20395584	chrA03	32.77	492	21.6208	0.328519	-27.5685
Bn-A03-p20398340	chrA03	32.77	492	21.6208	0.328519	-27.5685
Bn-A03-p20413103	chrA03	32.77	492	21.6208	0.328519	-27.5685
Bn-A03-p20417630	chrA03	32.77	492	21.6208	0.328519	-27.5685
Bn-A03-p20424880	chrA03	32.77	492	21.6208	0.328519	-27.5685
Bn-A03-p20427554	chrA03	32.77	492	21.6208	0.328519	-27.5685
Bn-A03-p20429794	chrA03	32.77	492	21.6208	0.328519	-27.5685
Bn-A03-p20525474	chrA03	32.77	492	21.6208	0.328519	-27.5685
Bn-A03-p20568764	chrA03	32.77	492	21.6208	0.328519	-27.5685
Bn-A03-p20604949	chrA03	32.77	492	21.6208	0.328519	-27.5685
Bn-A03-p20609910	chrA03	32.77	492	21.6208	0.328519	-27.5685
Bn-scaff_15695_1-p392962	chrA03	32.77	492	21.6208	0.328519	-27.5685
Bn-A03-p20627333	chrA03	33.57	493	21.3612	0.325301	-27.4336
Bn-A03-p20656717	chrA03	33.57	493	21.3612	0.325301	-27.4336
Bn-A03-p20662048	chrA03	33.57	493	21.3612	0.325301	-27.4336
Bn-A03-p20670561	chrA03	33.57	493	21.3612	0.325301	-27.4336
Bn-A03-p20727133	chrA03	33.57	493	21.3612	0.325301	-27.4336
Bn-scaff_18855_1-p831044	chrA03	33.57	493	21.3612	0.325301	-27.4336
Bn-scaff_26320_1-p35454	chrA03	33.57	493	21.3612	0.325301	-27.4336
Bn-A03-p20909567	chrA03	34.72	494	19.0642	0.296139	-26.4179
Bn-A03-p25636300	chrA03	53.46	495	6.91142	0.119542	-16.5465
Bn-A03-p25637279	chrA03	53.46	495	6.91142	0.119542	-16.5465
Bn-A03-p25879876	chrA03	53.77	496	6.57869	0.114129	-16.15
Bn-A03-p25949532	chrA03	53.77	496	6.57869	0.114129	-16.15
Bn-A03-p25951191	chrA03	53.77	496	6.57869	0.114129	-16.15
Bn-A03-p25957465	chrA03	53.77	496	6.57869	0.114129	-16.15
Bn-A03-p26021585	chrA03	53.77	496	6.57869	0.114129	-16.15
Bn-A03-p26195875	chrA03	54.98	497	5.77935	0.100989	-15.2136
Bn-A03-p26197815	chrA03	54.98	497	5.77935	0.100989	-15.2136
Bn-A03-p26202244	chrA03	54.98	497	5.77935	0.100989	-15.2136
Bn-A03-p26272560	chrA03	54.98	497	5.77935	0.100989	-15.2136
Bn-A03-p26405367	chrA03	55.37	498	5.34937	0.0938397	-14.6571
Bn-A03-p26406372	chrA03	55.37	498	5.34937	0.0938397	-14.6571
Bn-A03-p26433672	chrA03	55.37	498	5.34937	0.0938397	-14.6571
Bn-A03-p26433849	chrA03	55.37	498	5.34937	0.0938397	-14.6571
Bn-A03-p26433912	chrA03	55.37	498	5.34937	0.0938397	-14.6571
Bn-A03-p26433948	chrA03	55.37	498	5.34937	0.0938397	-14.6571
Bn-A03-p26437565	chrA03	55.37	498	5.34937	0.0938397	-14.6571
Bn-A03-p26444945	chrA03	55.37	498	5.34937	0.0938397	-14.6571
Bn-A03-p26445028	chrA03	55.37	498	5.34937	0.0938397	-14.6571
Bn-scaff_16069_1-p4479258	chrA03	55.37	498	5.34937	0.0938397	-14.6571
Bn-A03-p26477533	chrA03	56.17	499	4.56289	0.0806161	-13.5734
Bn-A03-p26478842	chrA03	56.17	499	4.56289	0.0806161	-13.5734
Bn-A03-p26567993	chrA03	56.17	499	4.56289	0.0806161	-13.5734
Bn-A03-p26571083	chrA03	56.17	499	4.56289	0.0806161	-13.5734
Bn-A03-p26572622	chrA03	56.17	499	4.56289	0.0806161	-13.5734
Bn-A03-p26763577	chrA03	57.38	500	3.89777	0.0692826	-12.5882
Bn-A03-p26764606	chrA03	57.38	500	3.89777	0.0692826	-12.5882
Bn-A09-p25680334	chrA03	57.77	501	3.55384	0.0633674	-12.0448
Bn-A03-p27377729	chrA03	59.4	502	2.85878	0.0512981	-10.8373
Bn-A03-p27377892	chrA03	59.4	502	2.85878	0.0512981	-10.8373
Bn-A03-p27379303	chrA03	59.4	502	2.85878	0.0512981	-10.8373
Bn-A03-p27438081	chrA03	59.79	503	2.61873	0.0470938	-10.3888
Bn-A03-p27445819	chrA03	59.79	503	2.61873	0.0470938	-10.3888
Bn-A03-p27454930	chrA03	59.79	503	2.61873	0.0470938	-10.3888
Bn-A03-p27455156	chrA03	59.79	503	2.61873	0.0470938	-10.3888
Bn-A03-p27484868	chrA03	59.79	503	2.61873	0.0470938	-10.3888
Bn-A03-p27541115	chrA03	59.79	503	2.61873	0.0470938	-10.3888
Bn-A03-p27546971	chrA03	59.79	503	2.61873	0.0470938	-10.3888
Bn-A03-p27547270	chrA03	59.79	503	2.61873	0.0470938	-10.3888
Bn-A03-p27564692	chrA03	59.79	503	2.61873	0.0470938	-10.3888
Bn-A03-p27568225	chrA03	59.79	503	2.61873	0.0470938	-10.3888
Bn-A03-p27568580	chrA03	59.79	503	2.61873	0.0470938	-10.3888
Bn-scaff_16110_1-p3054367	chrA03	59.79	503	2.61873	0.0470938	-10.3888
Bn-A03-p27581773	chrA03	60.19	504	2.38604	0.0430006	-9.92167
Bn-A03-p27582705	chrA03	60.19	504	2.38604	0.0430006	-9.92167
Bn-A03-p27596068	chrA03	60.19	504	2.38604	0.0430006	-9.92167
Bn-A03-p27600547	chrA03	60.19	504	2.38604	0.0430006	-9.92167
Bn-A03-p27607709	chrA03	60.19	504	2.38604	0.0430006	-9.92167
Bn-A03-p27612791	chrA03	60.19	504	2.38604	0.0430006	-9.92167
Bn-A03-p27616297	chrA03	60.19	504	2.38604	0.0430006	-9.92167
Bn-A03-p27629415	chrA03	60.19	504	2.38604	0.0430006	-9.92167
Bn-A03-p27650553	chrA03	60.19	504	2.38604	0.0430006	-9.92167
Bn-A03-p27662317	chrA03	60.19	504	2.38604	0.0430006	-9.92167
Bn-A03-p27663888	chrA03	60.19	504	2.38604	0.0430006	-9.92167
Bn-A03-p27683723	chrA03	60.19	504	2.38604	0.0430006	-9.92167
Bn-A03-p27683903	chrA03	60.19	504	2.38604	0.0430006	-9.92167
Bn-A03-p27685078	chrA03	60.19	504	2.38604	0.0430006	-9.92167
Bn-A03-p27686257	chrA03	60.19	504	2.38604	0.0430006	-9.92167
Bn-A03-p27686487	chrA03	60.19	504	2.38604	0.0430006	-9.92167
Bn-A03-p27686879	chrA03	60.19	504	2.38604	0.0430006	-9.92167
Bn-A03-p27712521	chrA03	60.19	504	2.38604	0.0430006	-9.92167
Bn-A03-p27713307	chrA03	60.19	504	2.38604	0.0430006	-9.92167
Bn-A03-p27713975	chrA03	60.19	504	2.38604	0.0430006	-9.92167
Bn-A03-p27715593	chrA03	60.19	504	2.38604	0.0430006	-9.92167
Bn-A03-p27719757	chrA03	60.19	504	2.38604	0.0430006	-9.92167
Bn-A03-p27720045	chrA03	60.19	504	2.38604	0.0430006	-9.92167
Bn-A03-p27741110	chrA03	60.19	504	2.38604	0.0430006	-9.92167
Bn-A03-p27742950	chrA03	60.19	504	2.38604	0.0430006	-9.92167
Bn-A03-p27747178	chrA03	60.19	504	2.38604	0.0430006	-9.92167
Bn-A03-p27752076	chrA03	60.19	504	2.38604	0.0430006	-9.92167
Bn-A03-p27752857	chrA03	60.19	504	2.38604	0.0430006	-9.92167
Bn-A03-p27791357	chrA03	60.19	504	2.38604	0.0430006	-9.92167
Bn-A03-p27791437	chrA03	60.19	504	2.38604	0.0430006	-9.92167
Bn-A03-p27793125	chrA03	60.19	504	2.38604	0.0430006	-9.92167
Bn-A03-p27794041	chrA03	60.19	504	2.38604	0.0430006	-9.92167
Bn-A03-p27794263	chrA03	60.19	504	2.38604	0.0430006	-9.92167
Bn-A03-p27794657	chrA03	60.19	504	2.38604	0.0430006	-9.92167
Bn-A03-p27794772	chrA03	60.19	504	2.38604	0.0430006	-9.92167
Bn-A03-p27794775	chrA03	60.19	504	2.38604	0.0430006	-9.92167
Bn-A03-p27794848	chrA03	60.19	504	2.38604	0.0430006	-9.92167
Bn-A03-p27796940	chrA03	60.19	504	2.38604	0.0430006	-9.92167
Bn-A03-p27805759	chrA03	60.19	504	2.38604	0.0430006	-9.92167
Bn-A03-p27824257	chrA03	60.19	504	2.38604	0.0430006	-9.92167
Bn-A03-p27825739	chrA03	60.19	504	2.38604	0.0430006	-9.92167
Bn-A03-p27828889	chrA03	60.19	504	2.38604	0.0430006	-9.92167
Bn-A03-p27838177	chrA03	60.19	504	2.38604	0.0430006	-9.92167
Bn-A03-p27840169	chrA03	60.19	504	2.38604	0.0430006	-9.92167
Bn-A03-p27841728	chrA03	60.19	504	2.38604	0.0430006	-9.92167
Bn-A03-p27853312	chrA03	60.19	504	2.38604	0.0430006	-9.92167
Bn-scaff_16110_1-p2973915	chrA03	60.19	504	2.38604	0.0430006	-9.92167
Bn-A03-p27866782	chrA03	60.59	505	2.32159	0.0418637	-9.79496
Bn-A03-p27906760	chrA03	60.98	506	2.1221	0.0383364	-9.37953
Bn-A03-p27917455	chrA03	60.98	506	2.1221	0.0383364	-9.37953
Bn-A03-p27927967	chrA03	60.98	506	2.1221	0.0383364	-9.37953
Bn-A03-p27951283	chrA03	60.98	506	2.1221	0.0383364	-9.37953
Bn-A03-p27951979	chrA03	60.98	506	2.1221	0.0383364	-9.37953
Bn-A03-p27972738	chrA03	60.98	506	2.1221	0.0383364	-9.37953
Bn-A03-p28036367	chrA03	60.98	506	2.1221	0.0383364	-9.37953
Bn-A03-p28039749	chrA03	60.98	506	2.1221	0.0383364	-9.37953
Bn-A03-p28043216	chrA03	60.98	506	2.1221	0.0383364	-9.37953
Bn-A03-p28091909	chrA03	60.98	506	2.1221	0.0383364	-9.37953
Bn-A03-p28097052	chrA03	60.98	506	2.1221	0.0383364	-9.37953
Bn-A03-p28109103	chrA03	60.98	506	2.1221	0.0383364	-9.37953
Bn-A03-p28117836	chrA03	60.98	506	2.1221	0.0383364	-9.37953
Bn-scaff_16110_1-p2721568	chrA03	60.98	506	2.1221	0.0383364	-9.37953
Bn-A03-p29776900	chrA03	63.01	507	1.70601	0.0309372	-8.43081
Bn-A03-p29780293	chrA03	63.01	507	1.70601	0.0309372	-8.43081
Bn-A03-p29781065	chrA03	63.01	507	1.70601	0.0309372	-8.43081
Bn-A03-p29790183	chrA03	63.01	507	1.70601	0.0309372	-8.43081
Bn-A03-p29802913	chrA03	63.01	507	1.70601	0.0309372	-8.43081
Bn-A03-p29803351	chrA03	63.01	507	1.70601	0.0309372	-8.43081
Bn-A03-p29805598	chrA03	63.01	507	1.70601	0.0309372	-8.43081
Bn-A03-p29806105	chrA03	63.01	507	1.70601	0.0309372	-8.43081
Bn-A03-p29816785	chrA03	63.01	507	1.70601	0.0309372	-8.43081
Bn-A03-p29849117	chrA03	63.01	507	1.70601	0.0309372	-8.43081
Bn-A03-p29855378	chrA03	63.01	507	1.70601	0.0309372	-8.43081
Bn-A03-p29868254	chrA03	63.01	507	1.70601	0.0309372	-8.43081
Bn-A03-p29873919	chrA03	63.01	507	1.70601	0.0309372	-8.43081
Bn-A03-p29874052	chrA03	63.01	507	1.70601	0.0309372	-8.43081
Bn-A03-p29899721	chrA03	63.01	507	1.70601	0.0309372	-8.43081
Bn-A03-p29926117	chrA03	63.01	507	1.70601	0.0309372	-8.43081
Bn-A03-p29956906	chrA03	63.01	507	1.70601	0.0309372	-8.43081
Bn-A03-p30029704	chrA03	63.01	507	1.70601	0.0309372	-8.43081
Bn-A03-p30057461	chrA03	63.01	507	1.70601	0.0309372	-8.43081
Bn-A03-p30170124	chrA03	63.01	507	1.70601	0.0309372	-8.43081
Bn-A03-p30183760	chrA03	63.01	507	1.70601	0.0309372	-8.43081
Bn-A03-p30183937	chrA03	63.01	507	1.70601	0.0309372	-8.43081
Bn-A03-p30243799	chrA03	63.01	507	1.70601	0.0309372	-8.43081
Bn-A03-p30291719	chrA03	63.01	507	1.70601	0.0309372	-8.43081
Bn-A03-p31147953	chrA03	63.01	507	1.70601	0.0309372	-8.43081
Bn-Scaffold000149-p188680	chrA03	63.01	507	1.70601	0.0309372	-8.43081
Bn-Scaffold000155-p353470	chrA03	63.01	507	1.70601	0.0309372	-8.43081
Bn-A03-p28389539	chrA03	69.37	508	1.70431	0.0309069	-8.50626
Bn-A03-p28464995	chrA03	69.37	508	1.70431	0.0309069	-8.50626
Bn-A03-p28469194	chrA03	69.37	508	1.70431	0.0309069	-8.50626
Bn-A03-p28498617	chrA03	69.37	508	1.70431	0.0309069	-8.50626
Bn-A03-p28498755	chrA03	69.37	508	1.70431	0.0309069	-8.50626
Bn-A03-p28499049	chrA03	69.37	508	1.70431	0.0309069	-8.50626
Bn-A03-p28499141	chrA03	69.37	508	1.70431	0.0309069	-8.50626
Bn-A03-p27104733	chrA03	70.95	509	2.03045	0.0367114	-9.26974
Bn-A03-p27369889	chrA03	70.95	509	2.03045	0.0367114	-9.26974
Bn-A03-p27372281	chrA03	70.95	509	2.03045	0.0367114	-9.26974
Bn-A03-p26284882	chrA03	74.68	510	3.84635	0.0684006	-12.6364
Bn-A03-p25827833	chrA03	75.88	511	4.46878	0.079021	-13.5342
Bn-A03-p25828479	chrA03	75.88	511	4.46878	0.079021	-13.5342
Bn-A03-p25839360	chrA03	75.88	511	4.46878	0.079021	-13.5342
Bn-A03-p25841615	chrA03	75.88	511	4.46878	0.079021	-13.5342
Bn-A03-p25843937	chrA03	75.88	511	4.46878	0.079021	-13.5342
Bn-A03-p25851789	chrA03	75.88	511	4.46878	0.079021	-13.5342
Bn-A03-p25868537	chrA03	75.88	511	4.46878	0.079021	-13.5342
Bn-A03-p25993601	chrA03	75.88	511	4.46878	0.079021	-13.5342
Bn-A03-p26119193	chrA03	75.88	511	4.46878	0.079021	-13.5342
Bn-A03-p26121502	chrA03	75.88	511	4.46878	0.079021	-13.5342
Bn-A03-p25819955	chrA03	76.27	512	4.76568	0.084044	-13.9725
Bn-A03-p25825392	chrA03	76.27	512	4.76568	0.084044	-13.9725
Bn-A03-p25826578	chrA03	76.27	512	4.76568	0.084044	-13.9725
Bn-A03-p25827210	chrA03	76.27	512	4.76568	0.084044	-13.9725
Bn-A03-p25296332	chrA03	77.48	513	5.25708	0.0922978	-14.5985
Bn-A03-p25314570	chrA03	77.48	513	5.25708	0.0922978	-14.5985
Bn-A03-p24971161	chrA03	77.88	514	5.76743	0.100791	-15.2687
Bn-A03-p24971360	chrA03	77.88	514	5.76743	0.100791	-15.2687
Bn-A03-p24990059	chrA03	77.88	514	5.76743	0.100791	-15.2687
Bn-A03-p24998976	chrA03	77.88	514	5.76743	0.100791	-15.2687
Bn-A03-p24999716	chrA03	77.88	514	5.76743	0.100791	-15.2687
Bn-A03-p25009736	chrA03	77.88	514	5.76743	0.100791	-15.2687
Bn-A03-p25009919	chrA03	77.88	514	5.76743	0.100791	-15.2687
Bn-A03-p25009925	chrA03	77.88	514	5.76743	0.100791	-15.2687
Bn-A03-p25024647	chrA03	77.88	514	5.76743	0.100791	-15.2687
Bn-A03-p25024749	chrA03	77.88	514	5.76743	0.100791	-15.2687
Bn-A03-p25024928	chrA03	77.88	514	5.76743	0.100791	-15.2687
Bn-A03-p25025360	chrA03	77.88	514	5.76743	0.100791	-15.2687
Bn-A03-p25032014	chrA03	77.88	514	5.76743	0.100791	-15.2687
Bn-A03-p25033468	chrA03	77.88	514	5.76743	0.100791	-15.2687
Bn-A03-p25043466	chrA03	77.88	514	5.76743	0.100791	-15.2687
Bn-scaff_16022_1-p35664	chrA03	78.28	515	5.51465	0.0965944	-14.9339
Bn-A03-p23715660	chrA03	78.67	516	5.81667	0.101606	-15.303
Bn-A03-p23798235	chrA03	78.67	516	5.81667	0.101606	-15.303
Bn-A03-p23799968	chrA03	78.67	516	5.81667	0.101606	-15.303
Bn-A03-p23801324	chrA03	78.67	516	5.81667	0.101606	-15.303
Bn-A03-p23809317	chrA03	78.67	516	5.81667	0.101606	-15.303
Bn-A03-p23809595	chrA03	78.67	516	5.81667	0.101606	-15.303
Bn-A03-p23810014	chrA03	78.67	516	5.81667	0.101606	-15.303
Bn-A03-p23822093	chrA03	78.67	516	5.81667	0.101606	-15.303
Bn-A03-p23860825	chrA03	78.67	516	5.81667	0.101606	-15.303
Bn-A03-p23861481	chrA03	78.67	516	5.81667	0.101606	-15.303
Bn-A03-p23862018	chrA03	78.67	516	5.81667	0.101606	-15.303
Bn-A03-p23862683	chrA03	78.67	516	5.81667	0.101606	-15.303
Bn-A03-p23868030	chrA03	78.67	516	5.81667	0.101606	-15.303
Bn-A03-p23887373	chrA03	78.67	516	5.81667	0.101606	-15.303
Bn-A03-p23890040	chrA03	78.67	516	5.81667	0.101606	-15.303
Bn-A03-p23917701	chrA03	78.67	516	5.81667	0.101606	-15.303
Bn-A03-p23921932	chrA03	78.67	516	5.81667	0.101606	-15.303
Bn-A03-p23973475	chrA03	78.67	516	5.81667	0.101606	-15.303
Bn-A03-p23980725	chrA03	78.67	516	5.81667	0.101606	-15.303
Bn-A03-p23980912	chrA03	78.67	516	5.81667	0.101606	-15.303
Bn-A03-p24016551	chrA03	78.67	516	5.81667	0.101606	-15.303
Bn-A03-p24048132	chrA03	78.67	516	5.81667	0.101606	-15.303
Bn-A03-p24349898	chrA03	78.67	516	5.81667	0.101606	-15.303
Bn-A05-p5790313	chrA03	78.67	516	5.81667	0.101606	-15.303
Bn-scaff_16069_1-p2142538	chrA03	78.67	516	5.81667	0.101606	-15.303
Bn-A03-p23708487	chrA03	79.07	517	6.03321	0.105183	-15.5574
Bn-A03-p23711362	chrA03	79.07	517	6.03321	0.105183	-15.5574
Bn-A03-p23017354	chrA03	79.47	518	6.24879	0.108729	-15.8053
Bn-A03-p23043608	chrA03	79.47	518	6.24879	0.108729	-15.8053
Bn-A03-p23065216	chrA03	79.47	518	6.24879	0.108729	-15.8053
Bn-A03-p23065321	chrA03	79.47	518	6.24879	0.108729	-15.8053
Bn-A03-p23185327	chrA03	79.47	518	6.24879	0.108729	-15.8053
Bn-A03-p23240923	chrA03	79.47	518	6.24879	0.108729	-15.8053
Bn-A03-p23243420	chrA03	79.47	518	6.24879	0.108729	-15.8053
Bn-A03-p22820943	chrA03	79.77	519	6.65708	0.115407	-16.3471
Bn-A03-p22820996	chrA03	79.77	519	6.65708	0.115407	-16.3471
Bn-A04-p10383434	chrA04	0	1214	0.244056	0.00448559	-0.950347
Bn-A04-p10387804	chrA04	0	1214	0.244056	0.00448559	-0.950347
Bn-A04-p10393460	chrA04	0	1214	0.244056	0.00448559	-0.950347
sN2025	chrA04	0	1214	0.244056	0.00448559	-0.950347
Bn-A04-p9841094	chrA04	1.11	1215	0.170646	0.00313847	-0.705135
Bn-A04-p9861037	chrA04	1.11	1215	0.170646	0.00313847	-0.705135
Bn-A04-p9863329	chrA04	1.11	1215	0.170646	0.00313847	-0.705135
Bn-A04-p9864811	chrA04	1.11	1215	0.170646	0.00313847	-0.705135
Bn-A04-p9864983	chrA04	1.11	1215	0.170646	0.00313847	-0.705135
Bn-A04-p9865629	chrA04	1.11	1215	0.170646	0.00313847	-0.705135
Bn-A04-p9865712	chrA04	1.11	1215	0.170646	0.00313847	-0.705135
Bn-A04-p9866201	chrA04	1.11	1215	0.170646	0.00313847	-0.705135
Bn-A04-p9868258	chrA04	1.11	1215	0.170646	0.00313847	-0.705135
Bn-A04-p9870167	chrA04	1.11	1215	0.170646	0.00313847	-0.705135
Bn-A04-p9107147	chrA04	3.56	1216	0.134795	0.00247993	-0.348411
Bn-A04-p9114826	chrA04	3.56	1216	0.134795	0.00247993	-0.348411
Bn-A04-p8718115	chrA04	4.34	1217	0.240557	0.00442142	-0.818362
Bn-A04-p8761898	chrA04	4.34	1217	0.240557	0.00442142	-0.818362
Bn-A04-p8773241	chrA04	4.34	1217	0.240557	0.00442142	-0.818362
Bn-A04-p8773286	chrA04	4.34	1217	0.240557	0.00442142	-0.818362
Bn-A04-p8782104	chrA04	4.34	1217	0.240557	0.00442142	-0.818362
Bn-A04-p8788445	chrA04	4.34	1217	0.240557	0.00442142	-0.818362
Bn-A04-p8790105	chrA04	4.34	1217	0.240557	0.00442142	-0.818362
Bn-A04-p8790433	chrA04	4.34	1217	0.240557	0.00442142	-0.818362
Bn-A04-p8807708	chrA04	4.34	1217	0.240557	0.00442142	-0.818362
Bn-A04-p8811740	chrA04	4.34	1217	0.240557	0.00442142	-0.818362
Bn-A04-p8813038	chrA04	4.34	1217	0.240557	0.00442142	-0.818362
Bn-A04-p8817780	chrA04	4.34	1217	0.240557	0.00442142	-0.818362
Bn-A04-p8824695	chrA04	4.34	1217	0.240557	0.00442142	-0.818362
Bn-A04-p8828395	chrA04	4.34	1217	0.240557	0.00442142	-0.818362
Bn-A04-p8828462	chrA04	4.34	1217	0.240557	0.00442142	-0.818362
Bn-A04-p8834077	chrA04	4.34	1217	0.240557	0.00442142	-0.818362
Bn-A04-p8834259	chrA04	4.34	1217	0.240557	0.00442142	-0.818362
Bn-A04-p8847485	chrA04	4.34	1217	0.240557	0.00442142	-0.818362
Bn-A04-p8850036	chrA04	4.34	1217	0.240557	0.00442142	-0.818362
Bn-scaff_16694_1-p22548	chrA04	4.34	1217	0.240557	0.00442142	-0.818362
Bn-scaff_16721_1-p1504805	chrA04	4.34	1217	0.240557	0.00442142	-0.818362
Bn-A04-p7760488	chrA04	8.08	1218	0.218384	0.00401471	-1.68815
Bn-A04-p7760541	chrA04	8.08	1218	0.218384	0.00401471	-1.68815
Bn-Scaffold005956-p293	chrA04	8.08	1218	0.218384	0.00401471	-1.68815
Bn-A04-p7519541	chrA04	8.46	1219	0.180009	0.0033104	-2.24612
Bn-A04-p7540834	chrA04	8.46	1219	0.180009	0.0033104	-2.24612
Bn-A04-p7541325	chrA04	8.46	1219	0.180009	0.0033104	-2.24612
Bn-A04-p7584788	chrA04	8.46	1219	0.180009	0.0033104	-2.24612
Bn-A04-p7596556	chrA04	8.46	1219	0.180009	0.0033104	-2.24612
Bn-A04-p7598934	chrA04	8.46	1219	0.180009	0.0033104	-2.24612
Bn-A04-p7601638	chrA04	8.46	1219	0.180009	0.0033104	-2.24612
Bn-A04-p7601731	chrA04	8.46	1219	0.180009	0.0033104	-2.24612
Bn-A04-p7616574	chrA04	8.46	1219	0.180009	0.0033104	-2.24612
Bn-A04-p7617794	chrA04	8.46	1219	0.180009	0.0033104	-2.24612
Bn-A04-p3229572	chrA04	9.26	1220	0.124156	0.00228443	-2.74297
Bn-A04-p5270881	chrA04	9.26	1220	0.124156	0.00228443	-2.74297
Bn-A04-p5273199	chrA04	9.26	1220	0.124156	0.00228443	-2.74297
Bn-A04-p5987463	chrA04	9.26	1220	0.124156	0.00228443	-2.74297
Bn-A04-p5999405	chrA04	9.26	1220	0.124156	0.00228443	-2.74297
Bn-A04-p6004690	chrA04	9.26	1220	0.124156	0.00228443	-2.74297
Bn-A04-p6008778	chrA04	9.26	1220	0.124156	0.00228443	-2.74297
Bn-A04-p6017218	chrA04	9.26	1220	0.124156	0.00228443	-2.74297
Bn-A04-p6017599	chrA04	9.26	1220	0.124156	0.00228443	-2.74297
Bn-A04-p6023914	chrA04	9.26	1220	0.124156	0.00228443	-2.74297
Bn-A04-p6027878	chrA04	9.26	1220	0.124156	0.00228443	-2.74297
Bn-A04-p6028097	chrA04	9.26	1220	0.124156	0.00228443	-2.74297
Bn-A04-p6028334	chrA04	9.26	1220	0.124156	0.00228443	-2.74297
Bn-A04-p6029797	chrA04	9.26	1220	0.124156	0.00228443	-2.74297
Bn-A04-p6047600	chrA04	9.26	1220	0.124156	0.00228443	-2.74297
Bn-A04-p6050616	chrA04	9.26	1220	0.124156	0.00228443	-2.74297
Bn-A04-p6053997	chrA04	9.26	1220	0.124156	0.00228443	-2.74297
Bn-A04-p6063409	chrA04	9.26	1220	0.124156	0.00228443	-2.74297
Bn-A04-p6228211	chrA04	9.26	1220	0.124156	0.00228443	-2.74297
Bn-A04-p6240855	chrA04	9.26	1220	0.124156	0.00228443	-2.74297
Bn-A04-p6255997	chrA04	9.26	1220	0.124156	0.00228443	-2.74297
Bn-A04-p6263702	chrA04	9.26	1220	0.124156	0.00228443	-2.74297
Bn-A04-p6264043	chrA04	9.26	1220	0.124156	0.00228443	-2.74297
Bn-A04-p6277634	chrA04	9.26	1220	0.124156	0.00228443	-2.74297
Bn-A04-p6296526	chrA04	9.26	1220	0.124156	0.00228443	-2.74297
Bn-A04-p6340854	chrA04	9.26	1220	0.124156	0.00228443	-2.74297
Bn-A04-p6341516	chrA04	9.26	1220	0.124156	0.00228443	-2.74297
Bn-A04-p6376472	chrA04	9.26	1220	0.124156	0.00228443	-2.74297
Bn-A04-p6395765	chrA04	9.26	1220	0.124156	0.00228443	-2.74297
Bn-A04-p6402808	chrA04	9.26	1220	0.124156	0.00228443	-2.74297
Bn-A04-p6422450	chrA04	9.26	1220	0.124156	0.00228443	-2.74297
Bn-A04-p6428686	chrA04	9.26	1220	0.124156	0.00228443	-2.74297
Bn-A04-p6448172	chrA04	9.26	1220	0.124156	0.00228443	-2.74297
Bn-A04-p6453979	chrA04	9.26	1220	0.124156	0.00228443	-2.74297
Bn-A04-p6454976	chrA04	9.26	1220	0.124156	0.00228443	-2.74297
Bn-A04-p6455109	chrA04	9.26	1220	0.124156	0.00228443	-2.74297
Bn-A04-p6456456	chrA04	9.26	1220	0.124156	0.00228443	-2.74297
Bn-A04-p6465442	chrA04	9.26	1220	0.124156	0.00228443	-2.74297
Bn-A04-p6486540	chrA04	9.26	1220	0.124156	0.00228443	-2.74297
Bn-A04-p6550369	chrA04	9.26	1220	0.124156	0.00228443	-2.74297
Bn-A04-p6555913	chrA04	9.26	1220	0.124156	0.00228443	-2.74297
Bn-A04-p6556405	chrA04	9.26	1220	0.124156	0.00228443	-2.74297
Bn-A04-p6632126	chrA04	9.26	1220	0.124156	0.00228443	-2.74297
Bn-A04-p6637458	chrA04	9.26	1220	0.124156	0.00228443	-2.74297
Bn-A04-p6640990	chrA04	9.26	1220	0.124156	0.00228443	-2.74297
Bn-A04-p6653508	chrA04	9.26	1220	0.124156	0.00228443	-2.74297
Bn-A04-p6657342	chrA04	9.26	1220	0.124156	0.00228443	-2.74297
Bn-A04-p6673120	chrA04	9.26	1220	0.124156	0.00228443	-2.74297
Bn-A04-p6678797	chrA04	9.26	1220	0.124156	0.00228443	-2.74297
Bn-A04-p6679568	chrA04	9.26	1220	0.124156	0.00228443	-2.74297
Bn-A04-p6682658	chrA04	9.26	1220	0.124156	0.00228443	-2.74297
Bn-A04-p6682728	chrA04	9.26	1220	0.124156	0.00228443	-2.74297
Bn-A04-p6683009	chrA04	9.26	1220	0.124156	0.00228443	-2.74297
Bn-A04-p6684054	chrA04	9.26	1220	0.124156	0.00228443	-2.74297
Bn-A04-p6685027	chrA04	9.26	1220	0.124156	0.00228443	-2.74297
Bn-A04-p6685062	chrA04	9.26	1220	0.124156	0.00228443	-2.74297
Bn-A04-p6685294	chrA04	9.26	1220	0.124156	0.00228443	-2.74297
Bn-A04-p6685371	chrA04	9.26	1220	0.124156	0.00228443	-2.74297
Bn-A04-p6697580	chrA04	9.26	1220	0.124156	0.00228443	-2.74297
Bn-A04-p6718464	chrA04	9.26	1220	0.124156	0.00228443	-2.74297
Bn-A04-p6778593	chrA04	9.26	1220	0.124156	0.00228443	-2.74297
Bn-A10-p10042838	chrA04	9.26	1220	0.124156	0.00228443	-2.74297
Bn-scaff_16394_1-p1154996	chrA04	9.26	1220	0.124156	0.00228443	-2.74297
Bn-scaff_16394_1-p1308247	chrA04	9.26	1220	0.124156	0.00228443	-2.74297
Bn-Scaffold000104-p502698	chrA04	9.26	1220	0.124156	0.00228443	-2.74297
Bn-Scaffold000104-p504653	chrA04	9.26	1220	0.124156	0.00228443	-2.74297
Bn-Scaffold000104-p504818	chrA04	9.26	1220	0.124156	0.00228443	-2.74297
Bn-Scaffold000104-p505283	chrA04	9.26	1220	0.124156	0.00228443	-2.74297
Bn-Scaffold000104-p508034	chrA04	9.26	1220	0.124156	0.00228443	-2.74297
Bn-Scaffold000104-p523766	chrA04	9.26	1220	0.124156	0.00228443	-2.74297
Bn-Scaffold000104-p523827	chrA04	9.26	1220	0.124156	0.00228443	-2.74297
Bn-Scaffold000104-p523846	chrA04	9.26	1220	0.124156	0.00228443	-2.74297
Bn-Scaffold000104-p546329	chrA04	9.26	1220	0.124156	0.00228443	-2.74297
Bn-Scaffold000104-p563040	chrA04	9.26	1220	0.124156	0.00228443	-2.74297
Bn-Scaffold000104-p613533	chrA04	9.26	1220	0.124156	0.00228443	-2.74297
Bn-Scaffold000104-p622483	chrA04	9.26	1220	0.124156	0.00228443	-2.74297
Bn-Scaffold000104-p628225	chrA04	9.26	1220	0.124156	0.00228443	-2.74297
Bn-A04-p4276334	chrA04	9.66	1221	0.136278	0.00250719	-2.2249
Bn-A04-p4060806	chrA04	10.05	1222	0.0933354	0.00171783	-1.73767
Bn-A04-p4074703	chrA04	10.05	1222	0.0933354	0.00171783	-1.73767
Bn-A04-p4097272	chrA04	10.05	1222	0.0933354	0.00171783	-1.73767
Bn-A04-p4099958	chrA04	10.05	1222	0.0933354	0.00171783	-1.73767
Bn-A04-p4101266	chrA04	10.05	1222	0.0933354	0.00171783	-1.73767
Bn-A04-p4101473	chrA04	10.05	1222	0.0933354	0.00171783	-1.73767
Bn-A04-p4102094	chrA04	10.05	1222	0.0933354	0.00171783	-1.73767
Bn-A04-p4107072	chrA04	10.05	1222	0.0933354	0.00171783	-1.73767
Bn-A04-p4112460	chrA04	10.05	1222	0.0933354	0.00171783	-1.73767
Bn-A04-p4117100	chrA04	10.05	1222	0.0933354	0.00171783	-1.73767
Bn-A04-p4124082	chrA04	10.05	1222	0.0933354	0.00171783	-1.73767
Bn-A04-p4124240	chrA04	10.05	1222	0.0933354	0.00171783	-1.73767
Bn-A04-p4131451	chrA04	10.05	1222	0.0933354	0.00171783	-1.73767
Bn-A04-p4150340	chrA04	10.05	1222	0.0933354	0.00171783	-1.73767
Bn-A04-p4152511	chrA04	10.05	1222	0.0933354	0.00171783	-1.73767
Bn-A04-p4169131	chrA04	10.05	1222	0.0933354	0.00171783	-1.73767
Bn-A04-p4179915	chrA04	10.05	1222	0.0933354	0.00171783	-1.73767
Bn-A04-p4203564	chrA04	10.05	1222	0.0933354	0.00171783	-1.73767
Bn-A04-p4204119	chrA04	10.05	1222	0.0933354	0.00171783	-1.73767
Bn-A04-p4204775	chrA04	10.05	1222	0.0933354	0.00171783	-1.73767
Bn-A04-p4207198	chrA04	10.05	1222	0.0933354	0.00171783	-1.73767
Bn-A04-p4221603	chrA04	10.05	1222	0.0933354	0.00171783	-1.73767
Bn-A04-p4223859	chrA04	10.05	1222	0.0933354	0.00171783	-1.73767
Bn-A04-p4224705	chrA04	10.05	1222	0.0933354	0.00171783	-1.73767
Bn-scaff_18776_1-p331403	chrA04	10.05	1222	0.0933354	0.00171783	-1.73767
Bn-A04-p1276308	chrA04	17.3	1223	0.0319743	0.000588815	-1.3305
Bn-A04-p1465207	chrA04	17.3	1223	0.0319743	0.000588815	-1.3305
Bn-A04-p1472416	chrA04	17.3	1223	0.0319743	0.000588815	-1.3305
Bn-A04-p1490485	chrA04	17.3	1223	0.0319743	0.000588815	-1.3305
Bn-A04-p1738118	chrA04	21.45	1224	0.0132136	0.000243373	-2.47102
Bn-A04-p1745832	chrA04	21.45	1224	0.0132136	0.000243373	-2.47102
Bn-A04-p1758570	chrA04	21.45	1224	0.0132136	0.000243373	-2.47102
Bn-A04-p1759257	chrA04	21.45	1224	0.0132136	0.000243373	-2.47102
Bn-A04-p1764916	chrA04	21.45	1224	0.0132136	0.000243373	-2.47102
Bn-A04-p1765163	chrA04	21.45	1224	0.0132136	0.000243373	-2.47102
Bn-A04-p1773333	chrA04	21.45	1224	0.0132136	0.000243373	-2.47102
Bn-A04-p1774031	chrA04	21.83	1225	0.0111538	0.00020544	-2.6837
Bn-A04-p1774926	chrA04	21.83	1225	0.0111538	0.00020544	-2.6837
Bn-A04-p1775155	chrA04	21.83	1225	0.0111538	0.00020544	-2.6837
Bn-A04-p1780149	chrA04	21.83	1225	0.0111538	0.00020544	-2.6837
Bn-A04-p1783485	chrA04	21.83	1225	0.0111538	0.00020544	-2.6837
Bn-scaff_20676_1-p435529	chrA04	21.83	1225	0.0111538	0.00020544	-2.6837
Bn-A04-p1815404	chrA04	22.22	1226	0.0476746	0.000877812	-2.98739
Bn-A04-p1837535	chrA04	22.22	1226	0.0476746	0.000877812	-2.98739
Bn-A04-p1854718	chrA04	22.22	1226	0.0476746	0.000877812	-2.98739
Bn-A05-p23844016	chrA05	0	685	0.015879	0.000292459	4.20381
Bn-A05-p23844225	chrA05	0	685	0.015879	0.000292459	4.20381
Bn-A05-p23848037	chrA05	0	685	0.015879	0.000292459	4.20381
Bn-A05-p23855991	chrA05	0	685	0.015879	0.000292459	4.20381
Bn-A05-p23893594	chrA05	0	685	0.015879	0.000292459	4.20381
Bn-scaff_15648_1-p311596	chrA05	0	685	0.015879	0.000292459	4.20381
Bn-Scaffold000217-p38537	chrA05	0	685	0.015879	0.000292459	4.20381
Bn-Scaffold000217-p38939	chrA05	0	685	0.015879	0.000292459	4.20381
Bn-Scaffold000217-p38973	chrA05	0	685	0.015879	0.000292459	4.20381
Bn-A05-p23776869	chrA05	1.21	686	0.0673981	0.00124075	4.15017
Bn-A05-p23782304	chrA05	1.21	686	0.0673981	0.00124075	4.15017
Bn-A05-p23791467	chrA05	1.21	686	0.0673981	0.00124075	4.15017
Bn-A05-p23587018	chrA05	2.01	687	0.214701	0.00394713	3.18572
Bn-A05-p23587547	chrA05	2.01	687	0.214701	0.00394713	3.18572
Bn-A05-p23680925	chrA05	2.01	687	0.214701	0.00394713	3.18572
Bn-A02-p26640222	chrA05	2.41	688	0.225494	0.00414513	2.71197
Bn-A02-p26641996	chrA05	2.41	688	0.225494	0.00414513	2.71197
Bn-A02-p26645956	chrA05	2.41	688	0.225494	0.00414513	2.71197
Bn-A02-p26646040	chrA05	2.41	688	0.225494	0.00414513	2.71197
Bn-A02-p26651278	chrA05	2.41	688	0.225494	0.00414513	2.71197
Bn-A02-p26653626	chrA05	2.41	688	0.225494	0.00414513	2.71197
Bn-A02-p26654006	chrA05	2.41	688	0.225494	0.00414513	2.71197
Bn-A02-p26656067	chrA05	2.41	688	0.225494	0.00414513	2.71197
Bn-A02-p26656981	chrA05	2.41	688	0.225494	0.00414513	2.71197
Bn-A02-p26658350	chrA05	2.41	688	0.225494	0.00414513	2.71197
Bn-A02-p26665282	chrA05	2.41	688	0.225494	0.00414513	2.71197
Bn-A02-p26668289	chrA05	2.41	688	0.225494	0.00414513	2.71197
Bn-A02-p26669888	chrA05	2.41	688	0.225494	0.00414513	2.71197
Bn-A02-p26686239	chrA05	2.41	688	0.225494	0.00414513	2.71197
Bn-A02-p26689319	chrA05	2.41	688	0.225494	0.00414513	2.71197
Bn-A02-p26713316	chrA05	2.41	688	0.225494	0.00414513	2.71197
Bn-A05-p23529753	chrA05	2.41	688	0.225494	0.00414513	2.71197
Bn-A05-p23529824	chrA05	2.41	688	0.225494	0.00414513	2.71197
Bn-A05-p23529883	chrA05	2.41	688	0.225494	0.00414513	2.71197
Bn-A05-p23530018	chrA05	2.41	688	0.225494	0.00414513	2.71197
Bn-A05-p23530095	chrA05	2.41	688	0.225494	0.00414513	2.71197
Bn-A05-p23531991	chrA05	2.41	688	0.225494	0.00414513	2.71197
Bn-A05-p23532126	chrA05	2.41	688	0.225494	0.00414513	2.71197
Bn-A05-p23532489	chrA05	2.41	688	0.225494	0.00414513	2.71197
Bn-A02-p26803902	chrA05	2.8	689	0.222979	0.004099	2.43968
Bn-A02-p26804091	chrA05	2.8	689	0.222979	0.004099	2.43968
Bn-A02-p26845132	chrA05	2.8	689	0.222979	0.004099	2.43968
Bn-A02-p26883269	chrA05	2.8	689	0.222979	0.004099	2.43968
Bn-A02-p26892575	chrA05	2.8	689	0.222979	0.004099	2.43968
Bn-A02-p26900937	chrA05	2.8	689	0.222979	0.004099	2.43968
Bn-A02-p26901243	chrA05	2.8	689	0.222979	0.004099	2.43968
Bn-A02-p26921384	chrA05	2.8	689	0.222979	0.004099	2.43968
Bn-A02-p26947254	chrA05	3.2	690	0.294559	0.00541129	1.80675
Bn-Scaffold000191-p89779	chrA05	3.6	691	0.289725	0.00532271	2.11579
Bn-Scaffold000191-p65525	chrA05	4	692	0.270118	0.00496339	2.29605
Bn-Scaffold000191-p70336	chrA05	4	692	0.270118	0.00496339	2.29605
Bn-Scaffold000203-p24382	chrA05	4	692	0.270118	0.00496339	2.29605
Bn-Scaffold000203-p8641	chrA05	4	692	0.270118	0.00496339	2.29605
Bn-A05-p23358283	chrA05	4.4	693	0.38066	0.00698749	1.77933
Bn-A05-p23314738	chrA05	4.8	694	0.383021	0.00703068	1.30998
Bn-A05-p23288913	chrA05	5.19	695	0.411522	0.00755185	0.997201
Bn-A05-p23276053	chrA05	5.59	696	0.358055	0.00657392	0.843464
Bn-A05-p23253826	chrA05	6.8	697	0.299233	0.0054969	0.509469
Bn-A02-p23279287	chrA05	8.01	698	0.32653	0.00599684	0.463498
Bn-A02-p23280472	chrA05	8.01	698	0.32653	0.00599684	0.463498
Bn-A02-p23280869	chrA05	8.01	698	0.32653	0.00599684	0.463498
Bn-A02-p23295254	chrA05	8.4	699	0.250473	0.00460325	0.900428
Bn-A02-p23297690	chrA05	8.4	699	0.250473	0.00460325	0.900428
Bn-A02-p23297789	chrA05	8.4	699	0.250473	0.00460325	0.900428
Bn-A05-p23081875	chrA05	10.02	700	0.109767	0.00201994	1.8158
Bn-A05-p23044521	chrA05	10.82	701	0.0814916	0.0015	1.46516
Bn-A05-p22938228	chrA05	11.2	702	0.09133	0.00168095	1.71303
Bn-A05-p22943215	chrA05	11.2	702	0.09133	0.00168095	1.71303
Bn-A05-p22981266	chrA05	11.2	702	0.09133	0.00168095	1.71303
Bn-A05-p22853415	chrA05	13.59	703	0.163425	0.00300587	1.49398
Bn-A05-p21248720	chrA05	28.96	704	0.0284603	0.000524121	0.291193
Bn-A05-p21267598	chrA05	28.96	704	0.0284603	0.000524121	0.291193
Bn-scaff_21369_1-p108745	chrA05	28.96	704	0.0284603	0.000524121	0.291193
Bn-A05-p21176831	chrA05	29.29	705	0.036259	0.000667693	-0.178689
Bn-A05-p21182276	chrA05	29.29	705	0.036259	0.000667693	-0.178689
Bn-A05-p21188442	chrA05	29.29	705	0.036259	0.000667693	-0.178689
Bn-A05-p21193491	chrA05	29.29	705	0.036259	0.000667693	-0.178689
Bn-scaff_21369_1-p260784	chrA05	29.29	705	0.036259	0.000667693	-0.178689
Bn-A05-p21081145	chrA05	29.68	706	0.0389694	0.000717585	-0.472689
Bn-A05-p21106566	chrA05	29.68	706	0.0389694	0.000717585	-0.472689
Bn-A05-p21107181	chrA05	29.68	706	0.0389694	0.000717585	-0.472689
Bn-A05-p21037865	chrA05	30.08	707	0.0219703	0.000404626	-0.163846
Bn-A05-p21065087	chrA05	30.08	707	0.0219703	0.000404626	-0.163846
Bn-A05-p20940971	chrA05	30.88	708	0.00283581	5.22362e-05	0.0374035
Bn-A05-p20955184	chrA05	30.88	708	0.00283581	5.22362e-05	0.0374035
Bn-A05-p21000008	chrA05	30.88	708	0.00283581	5.22362e-05	0.0374035
Bn-A05-p21000614	chrA05	30.88	708	0.00283581	5.22362e-05	0.0374035
Bn-A05-p20563653	chrA05	32.09	709	0.0266089	0.000490033	-1.3689
Bn-A05-p20337405	chrA05	32.49	710	0.010065	0.000185386	-1.48017
Bn-A05-p20375812	chrA05	32.49	710	0.010065	0.000185386	-1.48017
Bn-A05-p20377770	chrA05	32.49	710	0.010065	0.000185386	-1.48017
Bn-A05-p20379970	chrA05	32.49	710	0.010065	0.000185386	-1.48017
Bn-A05-p20380629	chrA05	32.49	710	0.010065	0.000185386	-1.48017
Bn-A05-p20386700	chrA05	32.49	710	0.010065	0.000185386	-1.48017
Bn-A05-p20390129	chrA05	32.49	710	0.010065	0.000185386	-1.48017
Bn-A05-p20394162	chrA05	32.49	710	0.010065	0.000185386	-1.48017
Bn-A05-p20399452	chrA05	32.49	710	0.010065	0.000185386	-1.48017
Bn-A05-p20422081	chrA05	32.49	710	0.010065	0.000185386	-1.48017
Bn-A05-p20485998	chrA05	32.49	710	0.010065	0.000185386	-1.48017
Bn-A05-p20487983	chrA05	32.49	710	0.010065	0.000185386	-1.48017
Bn-A05-p20534431	chrA05	32.49	710	0.010065	0.000185386	-1.48017
Bn-A05-p20541987	chrA05	32.49	710	0.010065	0.000185386	-1.48017
Bn-A05-p20549826	chrA05	32.49	710	0.010065	0.000185386	-1.48017
Bn-A05-p20296253	chrA05	32.89	711	0.0269277	0.000495903	-1.33723
Bn-A05-p20300638	chrA05	32.89	711	0.0269277	0.000495903	-1.33723
Bn-A05-p20302128	chrA05	32.89	711	0.0269277	0.000495903	-1.33723
Bn-A05-p20314128	chrA05	32.89	711	0.0269277	0.000495903	-1.33723
Bn-A05-p20316923	chrA05	32.89	711	0.0269277	0.000495903	-1.33723
Bn-A05-p20328249	chrA05	32.89	711	0.0269277	0.000495903	-1.33723
Bn-Scaffold002092-p583	chrA05	32.89	711	0.0269277	0.000495903	-1.33723
Bn-A05-p20290091	chrA05	33.28	712	0.0560654	0.00103223	-1.83496
Bn-A05-p20283717	chrA05	33.68	713	0.0189827	0.000349614	-1.4005
Bn-A05-p20283817	chrA05	33.68	713	0.0189827	0.000349614	-1.4005
Bn-A05-p20168806	chrA05	34.08	714	0.000572014	1.05368e-05	-0.776881
Bn-A05-p20168909	chrA05	34.08	714	0.000572014	1.05368e-05	-0.776881
Bn-A05-p20124425	chrA05	34.48	715	0.00103665	1.90957e-05	-1.10012
Bn-A05-p20125982	chrA05	34.48	715	0.00103665	1.90957e-05	-1.10012
Bn-A05-p20126071	chrA05	34.48	715	0.00103665	1.90957e-05	-1.10012
Bn-A05-p20127293	chrA05	34.48	715	0.00103665	1.90957e-05	-1.10012
Bn-A05-p20127547	chrA05	34.48	715	0.00103665	1.90957e-05	-1.10012
Bn-A05-p20075053	chrA05	34.88	716	0.00319217	5.88002e-05	-1.54192
Bn-A05-p19897379	chrA05	35.26	717	0.00705666	0.00012998	-1.27472
Bn-A05-p19909249	chrA05	35.26	717	0.00705666	0.00012998	-1.27472
Bn-A05-p19967151	chrA05	35.26	717	0.00705666	0.00012998	-1.27472
Bn-A05-p19612275	chrA05	38.13	718	8.05578e-06	1.48393e-07	-0.267878
Bn-A05-p19650213	chrA05	38.13	718	8.05578e-06	1.48393e-07	-0.267878
Bn-A05-p19650278	chrA05	38.13	718	8.05578e-06	1.48393e-07	-0.267878
Bn-A05-p19650965	chrA05	38.13	718	8.05578e-06	1.48393e-07	-0.267878
Bn-A05-p19653084	chrA05	38.13	718	8.05578e-06	1.48393e-07	-0.267878
Bn-A05-p19660820	chrA05	38.13	718	8.05578e-06	1.48393e-07	-0.267878
Bn-A05-p19666434	chrA05	38.13	718	8.05578e-06	1.48393e-07	-0.267878
Bn-A05-p19668317	chrA05	38.13	718	8.05578e-06	1.48393e-07	-0.267878
Bn-A05-p19668632	chrA05	38.13	718	8.05578e-06	1.48393e-07	-0.267878
Bn-A05-p19547378	chrA05	38.53	719	0.00093439	1.7212e-05	0.0300133
Bn-A05-p19550645	chrA05	38.53	719	0.00093439	1.7212e-05	0.0300133
Bn-A05-p19554281	chrA05	38.53	719	0.00093439	1.7212e-05	0.0300133
Bn-A05-p19278249	chrA05	38.93	720	0.00556311	0.000102471	0.386584
Bn-A05-p19278438	chrA05	38.93	720	0.00556311	0.000102471	0.386584
Bn-A05-p19359433	chrA05	38.93	720	0.00556311	0.000102471	0.386584
Bn-A05-p19359443	chrA05	38.93	720	0.00556311	0.000102471	0.386584
Bn-A05-p19207735	chrA05	39.32	721	0.0239826	0.000441679	0.301739
Bn-A05-p19209866	chrA05	39.32	721	0.0239826	0.000441679	0.301739
Bn-A05-p19224833	chrA05	39.32	721	0.0239826	0.000441679	0.301739
Bn-A05-p18807426	chrA05	41.36	722	0.0197705	0.00036412	0.358251
Bn-A05-p18819337	chrA05	41.36	722	0.0197705	0.00036412	0.358251
Bn-A05-p18819519	chrA05	41.36	722	0.0197705	0.00036412	0.358251
Bn-A05-p18819673	chrA05	41.36	722	0.0197705	0.00036412	0.358251
Bn-A05-p18820057	chrA05	41.36	722	0.0197705	0.00036412	0.358251
Bn-A05-p18820492	chrA05	41.36	722	0.0197705	0.00036412	0.358251
Bn-A05-p18828578	chrA05	41.36	722	0.0197705	0.00036412	0.358251
Bn-A05-p18828589	chrA05	41.36	722	0.0197705	0.00036412	0.358251
Bn-A05-p18704009	chrA05	41.75	723	0.0429527	0.000790904	0.806628
Bn-A05-p18704064	chrA05	41.75	723	0.0429527	0.000790904	0.806628
Bn-A05-p18704349	chrA05	41.75	723	0.0429527	0.000790904	0.806628
Bn-A05-p18730286	chrA05	41.75	723	0.0429527	0.000790904	0.806628
Bn-A05-p18744312	chrA05	41.75	723	0.0429527	0.000790904	0.806628
Bn-A05-p18744372	chrA05	41.75	723	0.0429527	0.000790904	0.806628
Bn-A05-p18753257	chrA05	41.75	723	0.0429527	0.000790904	0.806628
Bn-A05-p18759144	chrA05	41.75	723	0.0429527	0.000790904	0.806628
Bn-A05-p18761878	chrA05	41.75	723	0.0429527	0.000790904	0.806628
Bn-A05-p18793322	chrA05	41.75	723	0.0429527	0.000790904	0.806628
Bn-scaff_15690_1-p372287	chrA05	41.75	723	0.0429527	0.000790904	0.806628
Bn-scaff_15690_1-p406371	chrA05	41.75	723	0.0429527	0.000790904	0.806628
Bn-A01-p25349875	chrA05	42.15	724	0.00989514	0.000182259	0.798984
Bn-A05-p18309576	chrA05	42.15	724	0.00989514	0.000182259	0.798984
Bn-A05-p18310658	chrA05	42.15	724	0.00989514	0.000182259	0.798984
Bn-A05-p18310838	chrA05	42.15	724	0.00989514	0.000182259	0.798984
Bn-A05-p18391243	chrA05	42.15	724	0.00989514	0.000182259	0.798984
Bn-A05-p18391581	chrA05	42.15	724	0.00989514	0.000182259	0.798984
Bn-A05-p18452462	chrA05	42.15	724	0.00989514	0.000182259	0.798984
Bn-A05-p18452563	chrA05	42.15	724	0.00989514	0.000182259	0.798984
Bn-A05-p18453140	chrA05	42.15	724	0.00989514	0.000182259	0.798984
Bn-A05-p18458181	chrA05	42.15	724	0.00989514	0.000182259	0.798984
Bn-A05-p18475836	chrA05	42.15	724	0.00989514	0.000182259	0.798984
Bn-A05-p18480152	chrA05	42.15	724	0.00989514	0.000182259	0.798984
Bn-A05-p18490530	chrA05	42.15	724	0.00989514	0.000182259	0.798984
Bn-A05-p18505935	chrA05	42.15	724	0.00989514	0.000182259	0.798984
Bn-A05-p18528112	chrA05	42.15	724	0.00989514	0.000182259	0.798984
Bn-A05-p18543237	chrA05	42.15	724	0.00989514	0.000182259	0.798984
Bn-A05-p18543933	chrA05	42.15	724	0.00989514	0.000182259	0.798984
Bn-A05-p18547040	chrA05	42.15	724	0.00989514	0.000182259	0.798984
Bn-A05-p18590326	chrA05	42.15	724	0.00989514	0.000182259	0.798984
Bn-A05-p18598001	chrA05	42.15	724	0.00989514	0.000182259	0.798984
Bn-A05-p18615644	chrA05	42.15	724	0.00989514	0.000182259	0.798984
Bn-A05-p18616260	chrA05	42.15	724	0.00989514	0.000182259	0.798984
Bn-A05-p18627784	chrA05	42.15	724	0.00989514	0.000182259	0.798984
Bn-A05-p18637087	chrA05	42.15	724	0.00989514	0.000182259	0.798984
Bn-A05-p18642842	chrA05	42.15	724	0.00989514	0.000182259	0.798984
Bn-A05-p18682729	chrA05	42.15	724	0.00989514	0.000182259	0.798984
Bn-A05-p18687031	chrA05	42.15	724	0.00989514	0.000182259	0.798984
Bn-A05-p18689306	chrA05	42.15	724	0.00989514	0.000182259	0.798984
Bn-scaff_16893_1-p37613	chrA05	42.15	724	0.00989514	0.000182259	0.798984
Bn-scaff_16893_1-p69538	chrA05	42.15	724	0.00989514	0.000182259	0.798984
Bn-A05-p18196942	chrA05	42.55	725	0.00888264	0.000163611	0.393753
Bn-A05-p18214148	chrA05	42.55	725	0.00888264	0.000163611	0.393753
Bn-A05-p18223406	chrA05	42.55	725	0.00888264	0.000163611	0.393753
Bn-A05-p18229790	chrA05	42.55	725	0.00888264	0.000163611	0.393753
Bn-A05-p18135244	chrA05	42.95	726	0.00836235	0.000154028	0.858494
Bn-A05-p18137410	chrA05	42.95	726	0.00836235	0.000154028	0.858494
Bn-A05-p18139526	chrA05	42.95	726	0.00836235	0.000154028	0.858494
Bn-A05-p18161591	chrA05	42.95	726	0.00836235	0.000154028	0.858494
Bn-A05-p18191062	chrA05	42.95	726	0.00836235	0.000154028	0.858494
Bn-scaff_18189_1-p301812	chrA05	42.95	726	0.00836235	0.000154028	0.858494
Bn-A05-p18109527	chrA05	43.75	727	0.0132877	0.000244738	0.776047
Bn-A05-p18109536	chrA05	43.75	727	0.0132877	0.000244738	0.776047
Bn-A05-p18112139	chrA05	43.75	727	0.0132877	0.000244738	0.776047
Bn-A05-p18125663	chrA05	43.75	727	0.0132877	0.000244738	0.776047
Bn-A05-p17880874	chrA05	44.15	728	0.019437	0.000357979	0.511163
Bn-A05-p17894045	chrA05	44.15	728	0.019437	0.000357979	0.511163
Bn-A05-p17895197	chrA05	44.15	728	0.019437	0.000357979	0.511163
Bn-A05-p17913760	chrA05	44.15	728	0.019437	0.000357979	0.511163
Bn-scaff_16166_1-p407410	chrA05	44.15	728	0.019437	0.000357979	0.511163
Bn-scaff_16166_1-p421748	chrA05	44.15	728	0.019437	0.000357979	0.511163
Bn-A05-p17770256	chrA05	44.53	729	0.00917442	0.000168985	0.162022
Bn-A05-p17822322	chrA05	44.53	729	0.00917442	0.000168985	0.162022
Bn-A05-p17830597	chrA05	44.53	729	0.00917442	0.000168985	0.162022
Bn-A05-p17835705	chrA05	44.53	729	0.00917442	0.000168985	0.162022
Bn-A05-p11785796	chrA05	48.68	730	0.0135586	0.000249728	-1.02233
Bn-A05-p11927100	chrA05	48.68	730	0.0135586	0.000249728	-1.02233
Bn-scaff_21542_1-p12789	chrA05	48.68	730	0.0135586	0.000249728	-1.02233
Bn-A05-p11168272	chrA05	49.08	731	0.0270796	0.0004987	-0.589856
Bn-A05-p10267278	chrA05	49.47	732	0.023698	0.000436437	-0.816599
Bn-A05-p7911054	chrA05	51.37	733	0.00830272	0.00015293	-0.566068
Bn-A05-p7729367	chrA05	52.31	734	0.0187676	0.000345652	-1.03721
Bn-A05-p7809870	chrA05	52.31	734	0.0187676	0.000345652	-1.03721
Bn-A05-p7811409	chrA05	52.31	734	0.0187676	0.000345652	-1.03721
Bn-A05-p7826230	chrA05	52.31	734	0.0187676	0.000345652	-1.03721
Bn-A05-p7855766	chrA05	52.31	734	0.0187676	0.000345652	-1.03721
Bn-A05-p7496554	chrA05	52.69	735	0.00688121	0.000126749	-1.73264
Bn-A05-p7591501	chrA05	52.69	735	0.00688121	0.000126749	-1.73264
Bn-A05-p7705565	chrA05	52.69	735	0.00688121	0.000126749	-1.73264
Bn-scaff_16576_1-p385377	chrA05	52.69	735	0.00688121	0.000126749	-1.73264
Bn-A05-p6787164	chrA05	54.73	736	0.0691323	0.00127265	-1.18358
Bn-scaff_23907_1-p29685	chrA05	54.73	736	0.0691323	0.00127265	-1.18358
Bn-A05-p6682796	chrA05	55.13	737	0.206957	0.00380504	-1.0491
Bn-A05-p6688695	chrA05	55.13	737	0.206957	0.00380504	-1.0491
Bn-A05-p6739093	chrA05	55.13	737	0.206957	0.00380504	-1.0491
Bn-A05-p6739341	chrA05	55.13	737	0.206957	0.00380504	-1.0491
Bn-A05-p6748150	chrA05	55.13	737	0.206957	0.00380504	-1.0491
Bn-A05-p6750239	chrA05	55.13	737	0.206957	0.00380504	-1.0491
Bn-A05-p6750458	chrA05	55.13	737	0.206957	0.00380504	-1.0491
Bn-A05-p6751337	chrA05	55.13	737	0.206957	0.00380504	-1.0491
Bn-A05-p6751841	chrA05	55.13	737	0.206957	0.00380504	-1.0491
Bn-scaff_17869_1-p592847	chrA05	55.52	738	0.07087	0.00130462	-1.63372
Bn-A05-p6154871	chrA05	56.33	739	0.101434	0.00186674	-0.81248
Bn-A05-p6055523	chrA05	56.72	740	0.101457	0.00186716	-0.366163
Bn-A05-p6063715	chrA05	56.72	740	0.101457	0.00186716	-0.366163
Bn-A05-p6020205	chrA05	57.08	741	0.0856994	0.0015774	-0.832048
Bn-A05-p6021593	chrA05	57.08	741	0.0856994	0.0015774	-0.832048
Bn-A05-p4176921	chrA05	65.49	742	0.393007	0.00721331	0.264882
Bn-scaff_18338_1-p342516	chrA05	65.49	742	0.393007	0.00721331	0.264882
Bn-A05-p1898273	chrA05	81.27	743	0.869706	0.0158929	1.54741
Bn-A05-p2460244	chrA05	87.27	744	0.745646	0.0136414	1.86308
Bn-A05-p2472050	chrA05	87.27	744	0.745646	0.0136414	1.86308
Bn-A05-p2488952	chrA05	87.27	744	0.745646	0.0136414	1.86308
Bn-A05-p2489101	chrA05	87.27	744	0.745646	0.0136414	1.86308
Bn-A05-p2492451	chrA05	87.27	744	0.745646	0.0136414	1.86308
Bn-A05-p2495697	chrA05	87.27	744	0.745646	0.0136414	1.86308
Bn-A05-p2501988	chrA05	87.27	744	0.745646	0.0136414	1.86308
Bn-scaff_16534_1-p648790	chrA05	87.27	744	0.745646	0.0136414	1.86308
Bn-scaff_16534_1-p650838	chrA05	87.27	744	0.745646	0.0136414	1.86308
Bn-A05-p1806574	chrA05	90.96	745	0.97385	0.017779	2.98187
Bn-A05-p1762229	chrA05	91.33	746	1.01528	0.0185283	2.72598
Bn-A05-p1764530	chrA05	91.33	746	1.01528	0.0185283	2.72598
Bn-A05-p1765880	chrA05	91.33	746	1.01528	0.0185283	2.72598
Bn-A05-p1766223	chrA05	91.33	746	1.01528	0.0185283	2.72598
Bn-A05-p1775540	chrA05	91.33	746	1.01528	0.0185283	2.72598
Bn-scaff_16214_1-p45531	chrA05	91.33	746	1.01528	0.0185283	2.72598
Bn-A05-p1384000	chrA05	93.36	747	0.999206	0.0182377	2.4753
Bn-A05-p1237296	chrA05	95.25	748	1.3309	0.0242179	2.70566
Bn-A05-p1254185	chrA05	95.25	748	1.3309	0.0242179	2.70566
Bn-A05-p1260228	chrA05	95.51	749	1.36287	0.0247924	2.60148
Bn-A05-p1260305	chrA05	95.51	749	1.36287	0.0247924	2.60148
Bn-A05-p1260565	chrA05	95.51	749	1.36287	0.0247924	2.60148
Bn-A05-p1279304	chrA05	95.51	749	1.36287	0.0247924	2.60148
Bn-A05-p1281138	chrA05	95.51	749	1.36287	0.0247924	2.60148
Bn-A05-p1372057	chrA05	96.62	750	1.25242	0.0228063	3.03703
Bn-scaff_16864_1-p127295	chrA05	101.4	751	1.19456	0.0217642	2.48618
Bn-A05-p1216828	chrA05	104.35	752	1.56612	0.0284368	2.83478
Bn-scaff_16027_1-p668374	chrA05	104.35	752	1.56612	0.0284368	2.83478
Bn-A05-p907258	chrA05	106.8	753	2.1602	0.039011	4.95573
Bn-A05-p910039	chrA05	106.8	753	2.1602	0.039011	4.95573
Bn-A05-p922813	chrA05	106.8	753	2.1602	0.039011	4.95573
Bn-A05-p800515	chrA05	107.19	754	1.94147	0.0351312	5.04504
Bn-A05-p800549	chrA05	107.19	754	1.94147	0.0351312	5.04504
Bn-A05-p815322	chrA05	107.19	754	1.94147	0.0351312	5.04504
Bn-A05-p816963	chrA05	107.19	754	1.94147	0.0351312	5.04504
Bn-A05-p817036	chrA05	107.19	754	1.94147	0.0351312	5.04504
Bn-A05-p822597	chrA05	107.19	754	1.94147	0.0351312	5.04504
Bn-A05-p892520	chrA05	107.19	754	1.94147	0.0351312	5.04504
Bn-A05-p895522	chrA05	107.19	754	1.94147	0.0351312	5.04504
Bn-A05-p904751	chrA05	107.19	754	1.94147	0.0351312	5.04504
BRAS072	chrA05	107.19	754	1.94147	0.0351312	5.04504
Bn-A05-p780844	chrA05	107.99	755	1.66678	0.0302367	4.96723
Bn-A05-p784331	chrA05	107.99	755	1.66678	0.0302367	4.96723
Bn-A05-p757624	chrA05	108.39	756	1.60079	0.029057	4.69627
Bn-A05-p726481	chrA05	108.79	757	1.45048	0.0263651	4.83148
Bn-A05-p621136	chrA05	109.19	758	1.29208	0.0235199	4.4899
Bn-A05-p671910	chrA05	109.19	758	1.29208	0.0235199	4.4899
Bn-A05-p677619	chrA05	109.19	758	1.29208	0.0235199	4.4899
Bn-A05-p484591	chrA05	109.58	759	1.17853	0.0214754	4.73395
Bn-A05-p342596	chrA05	109.98	760	1.3466	0.0245001	4.6548
Bn-A05-p346822	chrA05	109.98	760	1.3466	0.0245001	4.6548
Bn-A05-p355200	chrA05	109.98	760	1.3466	0.0245001	4.6548
Bn-A05-p389230	chrA05	109.98	760	1.3466	0.0245001	4.6548
Bn-A05-p392053	chrA05	109.98	760	1.3466	0.0245001	4.6548
Bn-A05-p449086	chrA05	109.98	760	1.3466	0.0245001	4.6548
Bn-A05-p461633	chrA05	109.98	760	1.3466	0.0245001	4.6548
Bn-A05-p468551	chrA05	109.98	760	1.3466	0.0245001	4.6548
Bn-A05-p472271	chrA05	109.98	760	1.3466	0.0245001	4.6548
Bn-A05-p474257	chrA05	109.98	760	1.3466	0.0245001	4.6548
Bn-scaff_15712_1-p1137014	chrA06	0	331	0.0807956	0.0014872	2.15377
Bn-A06-p24825884	chrA06	2.79	332	0.0236172	0.000434951	1.28751
Bn-A06-p24827051	chrA06	2.79	332	0.0236172	0.000434951	1.28751
Bn-A06-p24827783	chrA06	2.79	332	0.0236172	0.000434951	1.28751
Bn-A06-p24831071	chrA06	2.79	332	0.0236172	0.000434951	1.28751
Bn-A06-p24834963	chrA06	2.79	332	0.0236172	0.000434951	1.28751
Bn-A06-p24836495	chrA06	2.79	332	0.0236172	0.000434951	1.28751
Bn-A06-p24849468	chrA06	2.79	332	0.0236172	0.000434951	1.28751
Bn-A06-p24886436	chrA06	2.79	332	0.0236172	0.000434951	1.28751
Bn-A06-p24890908	chrA06	2.79	332	0.0236172	0.000434951	1.28751
Bn-A06-p24913140	chrA06	2.79	332	0.0236172	0.000434951	1.28751
Bn-scaff_15715_1-p202940	chrA06	2.79	332	0.0236172	0.000434951	1.28751
Bn-scaff_15715_1-p204348	chrA06	2.79	332	0.0236172	0.000434951	1.28751
BrG0140	chrA06	2.79	332	0.0236172	0.000434951	1.28751
Bn-A06-p24814906	chrA06	3.97	333	0.0236447	0.000435457	0.726026
Bn-A06-p24713872	chrA06	6.84	334	0.166645	0.00306501	1.66971
Bn-A06-p24544753	chrA06	9.71	335	0.409992	0.00752388	2.33282
Bn-A06-p24551529	chrA06	9.71	335	0.409992	0.00752388	2.33282
Bn-A06-p24557193	chrA06	9.71	335	0.409992	0.00752388	2.33282
Bn-A06-p24508464	chrA06	10.1	336	0.463198	0.00849612	2.84882
Bn-A06-p24536499	chrA06	10.1	336	0.463198	0.00849612	2.84882
Bn-A06-p24496051	chrA06	10.5	337	0.462826	0.00848933	3.10613
Bn-A06-p24428073	chrA06	10.89	338	0.277772	0.00510367	2.43981
Bn-A06-p24430448	chrA06	10.89	338	0.277772	0.00510367	2.43981
Bn-A06-p24430453	chrA06	10.89	338	0.277772	0.00510367	2.43981
Bn-A06-p24431577	chrA06	10.89	338	0.277772	0.00510367	2.43981
Bn-A06-p24432451	chrA06	10.89	338	0.277772	0.00510367	2.43981
Bn-A06-p24432909	chrA06	10.89	338	0.277772	0.00510367	2.43981
Bn-A06-p24433131	chrA06	10.89	338	0.277772	0.00510367	2.43981
Bn-A06-p24441882	chrA06	10.89	338	0.277772	0.00510367	2.43981
Bn-A06-p24453423	chrA06	10.89	338	0.277772	0.00510367	2.43981
Bn-A06-p24465494	chrA06	10.89	338	0.277772	0.00510367	2.43981
Bn-A06-p24466136	chrA06	10.89	338	0.277772	0.00510367	2.43981
Bn-A06-p24467652	chrA06	10.89	338	0.277772	0.00510367	2.43981
Bn-A06-p24319329	chrA06	12.51	339	0.20632	0.00379335	1.42178
Bn-A06-p24178982	chrA06	13.67	340	0.040357	0.000743127	0.53693
Bn-scaff_16647_1-p284071	chrA06	13.67	340	0.040357	0.000743127	0.53693
Bn-A06-p24297216	chrA06	19.97	341	0.525689	0.00963681	3.06612
Bn-A06-p24340830	chrA06	19.97	341	0.525689	0.00963681	3.06612
Bn-A06-p24401543	chrA06	19.97	341	0.525689	0.00963681	3.06612
Bn-scaff_15754_1-p496098	chrA06	19.97	341	0.525689	0.00963681	3.06612
Bn-A06-p24220121	chrA06	20.36	342	0.24732	0.00454545	2.91534
Bn-A06-p24222064	chrA06	20.36	342	0.24732	0.00454545	2.91534
Bn-A06-p24236385	chrA06	20.36	342	0.24732	0.00454545	2.91534
Bn-A06-p24240603	chrA06	20.36	342	0.24732	0.00454545	2.91534
Bn-A06-p24245615	chrA06	20.36	342	0.24732	0.00454545	2.91534
Bn-A06-p24156988	chrA06	21.57	343	0.149614	0.00275219	2.2402
Bn-A06-p24132956	chrA06	22.37	344	0.109512	0.00201525	1.44013
Bn-A06-p24142937	chrA06	22.37	344	0.109512	0.00201525	1.44013
Bn-A06-p24145208	chrA06	22.37	344	0.109512	0.00201525	1.44013
Bn-A06-p24152122	chrA06	22.37	344	0.109512	0.00201525	1.44013
Bn-A06-p24045825	chrA06	23.99	345	0.0894421	0.00164623	0.43866
Bn-A06-p24046488	chrA06	23.99	345	0.0894421	0.00164623	0.43866
Bn-A06-p23968879	chrA06	24.38	346	0.12203	0.00224536	0.173215
Bn-A06-p23806343	chrA06	24.78	347	0.138056	0.00253985	0.466271
Bn-A06-p23865356	chrA06	24.78	347	0.138056	0.00253985	0.466271
Bn-A06-p23852270	chrA06	29.81	348	0.0190977	0.00035173	-1.01606
Bn-A06-p23857345	chrA06	29.81	348	0.0190977	0.00035173	-1.01606
Bn-A06-p23873505	chrA06	29.81	348	0.0190977	0.00035173	-1.01606
Bn-A06-p23892315	chrA06	29.81	348	0.0190977	0.00035173	-1.01606
Bn-A06-p23892404	chrA06	29.81	348	0.0190977	0.00035173	-1.01606
Bn-A09-p22612980	chrA06	29.81	348	0.0190977	0.00035173	-1.01606
Bn-A06-p23972440	chrA06	30.18	349	0.0142104	0.000261732	-1.28635
Bn-A06-p23983648	chrA06	30.18	349	0.0142104	0.000261732	-1.28635
Bn-A06-p24040939	chrA06	30.18	349	0.0142104	0.000261732	-1.28635
Bn-A06-p24041870	chrA06	30.18	349	0.0142104	0.000261732	-1.28635
Bn-A06-p24043170	chrA06	30.18	349	0.0142104	0.000261732	-1.28635
Bn-A06-p24070714	chrA06	30.18	349	0.0142104	0.000261732	-1.28635
Bn-A06-p24075375	chrA06	30.18	349	0.0142104	0.000261732	-1.28635
Bn-A06-p24076443	chrA06	30.18	349	0.0142104	0.000261732	-1.28635
Bn-A06-p21273211	chrA06	51.21	350	0.157612	0.00289911	3.61939
Bn-A06-p21277332	chrA06	51.5	351	0.0987007	0.00181648	3.06898
Bn-A06-p21278243	chrA06	51.5	351	0.0987007	0.00181648	3.06898
Bn-A06-p21280471	chrA06	51.5	351	0.0987007	0.00181648	3.06898
Bn-A06-p21280942	chrA06	51.5	351	0.0987007	0.00181648	3.06898
Bn-A06-p21281098	chrA06	51.5	351	0.0987007	0.00181648	3.06898
Bn-A06-p21315016	chrA06	51.9	352	0.0726927	0.00133815	3.38799
Bn-A06-p21321797	chrA06	51.9	352	0.0726927	0.00133815	3.38799
Bn-A06-p21463076	chrA06	51.9	352	0.0726927	0.00133815	3.38799
Bn-scaff_18520_1-p688050	chrA06	51.9	352	0.0726927	0.00133815	3.38799
Bn-A06-p21426650	chrA06	52.3	353	0.0488265	0.000899013	2.97263
Bn-A06-p21438687	chrA06	52.3	353	0.0488265	0.000899013	2.97263
Bn-A06-p21462006	chrA06	52.7	354	0.0518923	0.000955434	3.27548
Bn-A06-p21471436	chrA06	53.1	355	0.0353567	0.000651083	3.09405
Bn-A06-p18776948	chrA06	53.49	356	0.0136371	0.000251173	3.24563
Bn-A06-p18777001	chrA06	53.49	356	0.0136371	0.000251173	3.24563
Bn-A06-p18785908	chrA06	53.49	356	0.0136371	0.000251173	3.24563
Bn-A06-p18794208	chrA06	53.49	356	0.0136371	0.000251173	3.24563
Bn-A06-p21574157	chrA06	53.49	356	0.0136371	0.000251173	3.24563
Bn-scaff_17291_1-p732305	chrA06	53.49	356	0.0136371	0.000251173	3.24563
Bn-scaff_17291_1-p732388	chrA06	53.49	356	0.0136371	0.000251173	3.24563
Bn-A06-p18659358	chrA06	54.3	357	0.00216155	3.98165e-05	2.90735
Bn-A06-p18706102	chrA06	54.3	357	0.00216155	3.98165e-05	2.90735
Bn-A06-p18692755	chrA06	55.1	358	0.006905	0.000127187	2.97033
Bn-A06-p18634396	chrA06	55.49	359	0.00515842	9.50171e-05	3.46799
Bn-A06-p18500596	chrA06	55.89	360	0.014874	0.000273952	2.935
Bn-A06-p18500625	chrA06	55.89	360	0.014874	0.000273952	2.935
Bn-A06-p18502274	chrA06	55.89	360	0.014874	0.000273952	2.935
Bn-A06-p18502399	chrA06	55.89	360	0.014874	0.000273952	2.935
Bn-A06-p18402713	chrA06	56.28	361	0.0136018	0.000250523	3.27119
Bn-A06-p18408257	chrA06	56.28	361	0.0136018	0.000250523	3.27119
Bn-A06-p18430792	chrA06	56.28	361	0.0136018	0.000250523	3.27119
Bn-A06-p18438509	chrA06	56.28	361	0.0136018	0.000250523	3.27119
Bn-scaff_17291_1-p249622	chrA06	56.28	361	0.0136018	0.000250523	3.27119
Bn-A06-p17929532	chrA06	59.59	362	0.00137184	2.52698e-05	2.835
Bn-A06-p17790290	chrA06	59.97	363	0.000181563	3.3445e-06	2.20145
Bn-A06-p17791496	chrA06	59.97	363	0.000181563	3.3445e-06	2.20145
Bn-A06-p17791746	chrA06	59.97	363	0.000181563	3.3445e-06	2.20145
Bn-A06-p17887060	chrA06	59.97	363	0.000181563	3.3445e-06	2.20145
Bn-A06-p17889311	chrA06	59.97	363	0.000181563	3.3445e-06	2.20145
Bn-scaff_15705_1-p431621	chrA06	59.97	363	0.000181563	3.3445e-06	2.20145
Bn-scaff_15705_1-p523721	chrA06	59.97	363	0.000181563	3.3445e-06	2.20145
Bn-A06-p17684443	chrA06	60.36	364	0.000491417	9.0522e-06	2.53771
Bn-A06-p17689034	chrA06	60.36	364	0.000491417	9.0522e-06	2.53771
Bn-A06-p17689415	chrA06	60.36	364	0.000491417	9.0522e-06	2.53771
Bn-A06-p17697154	chrA06	60.36	364	0.000491417	9.0522e-06	2.53771
Bn-A06-p17699971	chrA06	60.36	364	0.000491417	9.0522e-06	2.53771
Bn-A06-p17415359	chrA06	61.99	365	0.00843694	0.000155402	2.18243
Bn-A06-p17430491	chrA06	61.99	365	0.00843694	0.000155402	2.18243
Bn-A06-p17452087	chrA06	61.99	365	0.00843694	0.000155402	2.18243
Bn-A06-p17548258	chrA06	61.99	365	0.00843694	0.000155402	2.18243
Bn-A06-p17548894	chrA06	61.99	365	0.00843694	0.000155402	2.18243
Bn-A06-p17549347	chrA06	61.99	365	0.00843694	0.000155402	2.18243
Bn-A06-p17549603	chrA06	61.99	365	0.00843694	0.000155402	2.18243
Bn-scaff_15705_1-p841235	chrA06	61.99	365	0.00843694	0.000155402	2.18243
Bn-A06-p17375407	chrA06	62.79	366	0.0169812	0.000312755	3.36381
Bn-A06-p17011382	chrA06	63.18	367	0.0255844	0.000471171	3.28636
Bn-A06-p17003685	chrA06	63.58	368	0.037881	0.000697551	2.99504
Bn-A06-p17006799	chrA06	63.58	368	0.037881	0.000697551	2.99504
Bn-A06-p17007775	chrA06	63.58	368	0.037881	0.000697551	2.99504
Bn-scaff_15705_1-p1435562	chrA06	63.58	368	0.037881	0.000697551	2.99504
Bn-A06-p16985788	chrA06	63.98	369	0.0497765	0.000916496	3.59296
Bn-A06-p16992951	chrA06	63.98	369	0.0497765	0.000916496	3.59296
Bn-A06-p16993923	chrA06	63.98	369	0.0497765	0.000916496	3.59296
Bn-A06-p16994210	chrA06	63.98	369	0.0497765	0.000916496	3.59296
Bn-A06-p16660065	chrA06	64.78	370	0.0565692	0.0010415	3.57306
Bn-A06-p16678748	chrA06	64.78	370	0.0565692	0.0010415	3.57306
Bn-A06-p16682224	chrA06	64.78	370	0.0565692	0.0010415	3.57306
Bn-A06-p16553412	chrA06	65.58	371	0.0379773	0.000699324	3.67738
Bn-A06-p16553640	chrA06	65.58	371	0.0379773	0.000699324	3.67738
Bn-A06-p16554297	chrA06	65.58	371	0.0379773	0.000699324	3.67738
Bn-A06-p16588120	chrA06	65.58	371	0.0379773	0.000699324	3.67738
Bn-A06-p16009894	chrA06	66.79	372	0.00814589	0.000150042	3.06969
Bn-A06-p16013571	chrA06	66.79	372	0.00814589	0.000150042	3.06969
Bn-A06-p16013796	chrA06	66.79	372	0.00814589	0.000150042	3.06969
Bn-A06-p16014870	chrA06	66.79	372	0.00814589	0.000150042	3.06969
Bn-A06-p16014941	chrA06	66.79	372	0.00814589	0.000150042	3.06969
Bn-A06-p16015026	chrA06	66.79	372	0.00814589	0.000150042	3.06969
Bn-A06-p16015727	chrA06	66.79	372	0.00814589	0.000150042	3.06969
Bn-A06-p16015795	chrA06	66.79	372	0.00814589	0.000150042	3.06969
Bn-A06-p16016634	chrA06	66.79	372	0.00814589	0.000150042	3.06969
Bn-A06-p16025514	chrA06	66.79	372	0.00814589	0.000150042	3.06969
Bn-A06-p16030994	chrA06	66.79	372	0.00814589	0.000150042	3.06969
Bn-A06-p16032028	chrA06	66.79	372	0.00814589	0.000150042	3.06969
Bn-A06-p16064239	chrA06	66.79	372	0.00814589	0.000150042	3.06969
Bn-A06-p16071214	chrA06	66.79	372	0.00814589	0.000150042	3.06969
Bn-A06-p16102726	chrA06	66.79	372	0.00814589	0.000150042	3.06969
Bn-A06-p15778397	chrA06	67.18	373	0.0161036	0.000296595	3.45244
Bn-A06-p15791244	chrA06	67.18	373	0.0161036	0.000296595	3.45244
Bn-A06-p15893014	chrA06	67.18	373	0.0161036	0.000296595	3.45244
Bn-A06-p15893221	chrA06	67.18	373	0.0161036	0.000296595	3.45244
Bn-A06-p15894910	chrA06	67.18	373	0.0161036	0.000296595	3.45244
Bn-A06-p15921988	chrA06	67.18	373	0.0161036	0.000296595	3.45244
Bn-A06-p15922683	chrA06	67.18	373	0.0161036	0.000296595	3.45244
Bn-A07-p3486022	chrA06	67.18	373	0.0161036	0.000296595	3.45244
Bn-scaff_17044_1-p521346	chrA06	67.18	373	0.0161036	0.000296595	3.45244
Bn-A06-p15632434	chrA06	67.98	374	0.00523394	9.6408e-05	3.39995
Bn-A06-p15649917	chrA06	67.98	374	0.00523394	9.6408e-05	3.39995
Bn-A06-p15294160	chrA06	68.38	375	0.00542729	9.99693e-05	3.05411
Bn-A06-p15360859	chrA06	68.38	375	0.00542729	9.99693e-05	3.05411
Bn-A06-p15415078	chrA06	68.38	375	0.00542729	9.99693e-05	3.05411
Bn-A06-p15258692	chrA06	68.78	376	0.0165576	0.000304956	3.71016
Bn-A06-p14813811	chrA06	69.58	377	0.0250894	0.000462057	3.26986
Bn-A06-p14829925	chrA06	69.58	377	0.0250894	0.000462057	3.26986
Bn-A06-p14834424	chrA06	69.58	377	0.0250894	0.000462057	3.26986
Bn-A06-p14836066	chrA06	69.58	377	0.0250894	0.000462057	3.26986
Bn-scaff_18356_1-p309880	chrA06	69.58	377	0.0250894	0.000462057	3.26986
Bn-scaff_18356_1-p311981	chrA06	69.58	377	0.0250894	0.000462057	3.26986
Bn-A06-p14417437	chrA06	69.98	378	0.024052	0.000442955	2.88352
Bn-A06-p14428186	chrA06	69.98	378	0.024052	0.000442955	2.88352
Bn-A06-p14428293	chrA06	69.98	378	0.024052	0.000442955	2.88352
Bn-A06-p14439178	chrA06	69.98	378	0.024052	0.000442955	2.88352
Bn-A06-p14439400	chrA06	69.98	378	0.024052	0.000442955	2.88352
Bn-A06-p14457099	chrA06	69.98	378	0.024052	0.000442955	2.88352
Bn-scaff_19310_1-p247331	chrA06	69.98	378	0.024052	0.000442955	2.88352
Bn-A06-p11704401	chrA06	70.37	379	0.0240905	0.000443664	2.8824
Bn-A06-p11708819	chrA06	70.37	379	0.0240905	0.000443664	2.8824
Bn-A06-p11819954	chrA06	70.37	379	0.0240905	0.000443664	2.8824
Bn-A06-p11840908	chrA06	70.37	379	0.0240905	0.000443664	2.8824
Bn-A06-p11848553	chrA06	70.37	379	0.0240905	0.000443664	2.8824
Bn-A06-p11848767	chrA06	70.37	379	0.0240905	0.000443664	2.8824
Bn-A06-p11848770	chrA06	70.37	379	0.0240905	0.000443664	2.8824
Bn-A06-p14179943	chrA06	70.37	379	0.0240905	0.000443664	2.8824
Bn-A06-p18807305	chrA06	70.37	379	0.0240905	0.000443664	2.8824
Bn-A06-p18813274	chrA06	70.37	379	0.0240905	0.000443664	2.8824
Bn-A06-p18867395	chrA06	70.37	379	0.0240905	0.000443664	2.8824
Bn-A06-p18872147	chrA06	70.37	379	0.0240905	0.000443664	2.8824
Bn-A06-p18880950	chrA06	70.37	379	0.0240905	0.000443664	2.8824
Bn-A06-p18882138	chrA06	70.37	379	0.0240905	0.000443664	2.8824
Bn-A06-p18885366	chrA06	70.37	379	0.0240905	0.000443664	2.8824
Bn-A06-p18898902	chrA06	70.37	379	0.0240905	0.000443664	2.8824
Bn-A06-p19163919	chrA06	70.37	379	0.0240905	0.000443664	2.8824
Bn-A06-p19184868	chrA06	70.37	379	0.0240905	0.000443664	2.8824
Bn-A06-p19185585	chrA06	70.37	379	0.0240905	0.000443664	2.8824
Bn-A06-p19416292	chrA06	70.37	379	0.0240905	0.000443664	2.8824
Bn-A06-p19418423	chrA06	70.37	379	0.0240905	0.000443664	2.8824
Bn-A06-p19419215	chrA06	70.37	379	0.0240905	0.000443664	2.8824
Bn-A06-p19549093	chrA06	70.37	379	0.0240905	0.000443664	2.8824
Bn-A06-p19549571	chrA06	70.37	379	0.0240905	0.000443664	2.8824
Bn-A06-p19555116	chrA06	70.37	379	0.0240905	0.000443664	2.8824
Bn-A06-p19562187	chrA06	70.37	379	0.0240905	0.000443664	2.8824
Bn-scaff_17249_1-p1054417	chrA06	70.37	379	0.0240905	0.000443664	2.8824
Bn-A05-p21814557	chrA06	71.17	380	0.0824644	0.0015179	2.54265
Bn-A06-p10251899	chrA06	71.17	380	0.0824644	0.0015179	2.54265
Bn-A06-p10327909	chrA06	71.17	380	0.0824644	0.0015179	2.54265
Bn-A06-p10349427	chrA06	71.17	380	0.0824644	0.0015179	2.54265
Bn-A06-p10351604	chrA06	71.17	380	0.0824644	0.0015179	2.54265
Bn-A06-p10391346	chrA06	71.17	380	0.0824644	0.0015179	2.54265
Bn-A06-p10403901	chrA06	71.17	380	0.0824644	0.0015179	2.54265
Bn-A06-p10574739	chrA06	71.17	380	0.0824644	0.0015179	2.54265
Bn-A06-p10578969	chrA06	71.17	380	0.0824644	0.0015179	2.54265
Bn-A06-p10579615	chrA06	71.17	380	0.0824644	0.0015179	2.54265
Bn-A06-p10594170	chrA06	71.17	380	0.0824644	0.0015179	2.54265
Bn-A06-p10606807	chrA06	71.17	380	0.0824644	0.0015179	2.54265
Bn-A06-p10609574	chrA06	71.17	380	0.0824644	0.0015179	2.54265
Bn-A06-p10642761	chrA06	71.17	380	0.0824644	0.0015179	2.54265
Bn-A06-p11021085	chrA06	71.17	380	0.0824644	0.0015179	2.54265
Bn-A06-p11025660	chrA06	71.17	380	0.0824644	0.0015179	2.54265
Bn-A06-p11165324	chrA06	71.17	380	0.0824644	0.0015179	2.54265
Bn-A06-p11165375	chrA06	71.17	380	0.0824644	0.0015179	2.54265
Bn-A06-p11231528	chrA06	71.17	380	0.0824644	0.0015179	2.54265
Bn-A06-p11239689	chrA06	71.17	380	0.0824644	0.0015179	2.54265
Bn-A06-p11291712	chrA06	71.17	380	0.0824644	0.0015179	2.54265
Bn-A06-p11297663	chrA06	71.17	380	0.0824644	0.0015179	2.54265
Bn-A06-p11301532	chrA06	71.17	380	0.0824644	0.0015179	2.54265
Bn-A06-p11343875	chrA06	71.17	380	0.0824644	0.0015179	2.54265
Bn-A06-p11356047	chrA06	71.17	380	0.0824644	0.0015179	2.54265
Bn-A06-p11356414	chrA06	71.17	380	0.0824644	0.0015179	2.54265
Bn-A06-p11356524	chrA06	71.17	380	0.0824644	0.0015179	2.54265
Bn-A06-p11362290	chrA06	71.17	380	0.0824644	0.0015179	2.54265
Bn-scaff_23407_1-p125338	chrA06	71.17	380	0.0824644	0.0015179	2.54265
Bn-A06-p9452981	chrA06	72.39	381	0.0194067	0.000357422	1.80114
Bn-A06-p9517147	chrA06	72.39	381	0.0194067	0.000357422	1.80114
Bn-A06-p9562200	chrA06	72.39	381	0.0194067	0.000357422	1.80114
Bn-A06-p9289355	chrA06	72.78	382	0.0047322	8.71665e-05	1.28362
Bn-A06-p9291582	chrA06	72.78	382	0.0047322	8.71665e-05	1.28362
Bn-A06-p9376280	chrA06	72.78	382	0.0047322	8.71665e-05	1.28362
Bn-A02-p14938768	chrA06	73.58	383	0.00079711	1.46832e-05	2.04963
Bn-A02-p14939071	chrA06	73.58	383	0.00079711	1.46832e-05	2.04963
Bn-A02-p14939204	chrA06	73.58	383	0.00079711	1.46832e-05	2.04963
Bn-A02-p14939483	chrA06	73.58	383	0.00079711	1.46832e-05	2.04963
Bn-A02-p14940026	chrA06	73.58	383	0.00079711	1.46832e-05	2.04963
Bn-A02-p14940029	chrA06	73.58	383	0.00079711	1.46832e-05	2.04963
Bn-A02-p14940149	chrA06	73.58	383	0.00079711	1.46832e-05	2.04963
Bn-A02-p14941541	chrA06	73.58	383	0.00079711	1.46832e-05	2.04963
Bn-A02-p14942048	chrA06	73.58	383	0.00079711	1.46832e-05	2.04963
Bn-A06-p8948420	chrA06	73.58	383	0.00079711	1.46832e-05	2.04963
Bn-A06-p9074653	chrA06	73.58	383	0.00079711	1.46832e-05	2.04963
Bn-A06-p9090817	chrA06	73.58	383	0.00079711	1.46832e-05	2.04963
Bn-A06-p9094772	chrA06	73.58	383	0.00079711	1.46832e-05	2.04963
Bn-A06-p9119114	chrA06	73.58	383	0.00079711	1.46832e-05	2.04963
Bn-A02-p14940218	chrA06	73.98	384	0.000100374	1.84895e-06	1.72399
Bn-A02-p14941595	chrA06	73.98	384	0.000100374	1.84895e-06	1.72399
Bn-A02-p14941620	chrA06	75.6	385	0.00301194	5.54805e-05	1.39954
Bn-A02-p14938941	chrA06	75.72	386	0.00324659	5.98025e-05	1.22532
Bn-A06-p8697187	chrA06	76.52	387	0.0174469	0.000321332	0.479683
Bn-A06-p8697193	chrA06	77.46	388	0.0101785	0.000187477	1.26763
Bn-A06-p8527596	chrA06	78.66	389	0.0109212	0.000201155	1.29379
Bn-A06-p8601048	chrA06	78.66	389	0.0109212	0.000201155	1.29379
Bn-A06-p8601089	chrA06	78.66	389	0.0109212	0.000201155	1.29379
Bn-A06-p8615815	chrA06	78.66	389	0.0109212	0.000201155	1.29379
Bn-A06-p8634648	chrA06	78.66	389	0.0109212	0.000201155	1.29379
Bn-scaff_27453_1-p3576	chrA06	78.66	389	0.0109212	0.000201155	1.29379
Bn-A06-p7355866	chrA06	79.83	390	0.0806311	0.00148418	1.98219
Bn-A06-p7420466	chrA06	79.83	390	0.0806311	0.00148418	1.98219
Bn-A06-p7437586	chrA06	79.83	390	0.0806311	0.00148418	1.98219
Bn-A06-p7459428	chrA06	79.83	390	0.0806311	0.00148418	1.98219
Bn-A06-p7459843	chrA06	79.83	390	0.0806311	0.00148418	1.98219
Bn-A06-p7460077	chrA06	79.83	390	0.0806311	0.00148418	1.98219
Bn-A06-p7657281	chrA06	79.83	390	0.0806311	0.00148418	1.98219
Bn-A06-p7658535	chrA06	79.83	390	0.0806311	0.00148418	1.98219
Bn-A06-p5907449	chrA06	87.62	391	0.0742772	0.0013673	-0.111398
Bn-A06-p5878990	chrA06	87.98	392	0.124502	0.00229079	0.345448
Bn-A06-p5888779	chrA06	87.98	392	0.124502	0.00229079	0.345448
Bn-A06-p5826493	chrA06	88.78	393	0.120881	0.00222423	0.376973
Bn-A06-p5739682	chrA06	89.99	394	0.130254	0.00239649	1.66815
Bn-A06-p5741557	chrA06	89.99	394	0.130254	0.00239649	1.66815
Bn-A06-p5758576	chrA06	89.99	394	0.130254	0.00239649	1.66815
Bn-A06-p5767097	chrA06	89.99	394	0.130254	0.00239649	1.66815
Bn-A06-p5669960	chrA06	90.39	395	0.103469	0.00190415	1.32545
Bn-A06-p5535537	chrA06	91.19	396	0.0763252	0.00140497	1.58168
Bn-A06-p5540327	chrA06	91.19	396	0.0763252	0.00140497	1.58168
Bn-A06-p5546411	chrA06	91.19	396	0.0763252	0.00140497	1.58168
Bn-scaff_18181_1-p1603190	chrA06	91.19	396	0.0763252	0.00140497	1.58168
Bn-A06-p5114770	chrA06	91.58	397	0.0677187	0.00124665	2.14936
Bn-A06-p4896084	chrA06	92.8	398	0.0135438	0.000249454	1.25867
Bn-A06-p4901091	chrA06	92.8	398	0.0135438	0.000249454	1.25867
Bn-A06-p4901457	chrA06	92.8	398	0.0135438	0.000249454	1.25867
Bn-A06-p4874556	chrA06	93.18	399	0.0207215	0.000381631	1.52705
Bn-A06-p4517457	chrA06	95.22	400	0.000516106	9.50698e-06	1.75235
Bn-A06-p4315934	chrA06	96.01	401	0.00795408	0.000146509	1.83529
Bn-A05-p14364345	chrA06	97.23	402	0.0755768	0.00139121	3.22088
Bn-A06-p3992289	chrA06	97.23	402	0.0755768	0.00139121	3.22088
Bn-A06-p3997307	chrA06	97.23	402	0.0755768	0.00139121	3.22088
Bn-A06-p3998593	chrA06	97.23	402	0.0755768	0.00139121	3.22088
Bn-A06-p4013010	chrA06	97.23	402	0.0755768	0.00139121	3.22088
Bn-A06-p3987067	chrA06	97.56	403	0.107727	0.00198244	2.92644
Bn-A06-p3051928	chrA06	110.8	404	0.0638842	0.0011761	-1.01008
Bn-A06-p2987202	chrA06	111.14	405	0.141227	0.00259812	-1.47295
Bn-A06-p2993800	chrA06	111.14	405	0.141227	0.00259812	-1.47295
Bn-A06-p2995114	chrA06	111.14	405	0.141227	0.00259812	-1.47295
Bn-A06-p3005047	chrA06	111.14	405	0.141227	0.00259812	-1.47295
Bn-A06-p3005981	chrA06	111.14	405	0.141227	0.00259812	-1.47295
Bn-A06-p3009854	chrA06	111.14	405	0.141227	0.00259812	-1.47295
Bn-A06-p2981395	chrA06	111.51	406	0.138247	0.00254337	-1.74228
Bn-scaff_20901_1-p951365	chrA06	111.51	406	0.138247	0.00254337	-1.74228
Bn-A06-p2807759	chrA06	117.01	407	0.317189	0.0058258	-1.64813
Bn-A06-p2748311	chrA06	117.38	408	0.253336	0.00465575	-1.27369
Bn-A06-p2756247	chrA06	117.38	408	0.253336	0.00465575	-1.27369
Bn-A06-p2756792	chrA06	117.38	408	0.253336	0.00465575	-1.27369
Bn-A06-p2758495	chrA06	117.38	408	0.253336	0.00465575	-1.27369
Bn-scaff_28179_1-p21528	chrA06	117.38	408	0.253336	0.00465575	-1.27369
Bn-A06-p2718852	chrA06	118.59	409	0.218114	0.00400975	-0.277813
Bn-A06-p2729577	chrA06	118.59	409	0.218114	0.00400975	-0.277813
Bn-A06-p2676798	chrA06	118.99	410	0.233412	0.00429038	-0.558372
Bn-A06-p2630468	chrA06	119.38	411	0.200559	0.00368761	-0.692801
Bn-A06-p2633224	chrA06	119.38	411	0.200559	0.00368761	-0.692801
Bn-A06-p2650442	chrA06	119.38	411	0.200559	0.00368761	-0.692801
Bn-A06-p2619089	chrA06	119.78	412	0.175562	0.00322874	-0.951159
Bn-A06-p2542722	chrA06	120.18	413	0.27505	0.00505379	-1.43738
Bn-A06-p2582613	chrA06	120.18	413	0.27505	0.00505379	-1.43738
Bn-A06-p2617079	chrA06	120.18	413	0.27505	0.00505379	-1.43738
Bn-A06-p2521454	chrA06	120.58	414	0.295054	0.00542035	-1.78923
Bn-A06-p2412998	chrA06	121.79	415	0.356735	0.00654976	-1.43791
Bn-A06-p2413971	chrA06	121.79	415	0.356735	0.00654976	-1.43791
Bn-A06-p2268393	chrA06	122.18	416	0.41884	0.00768563	-1.44234
Bn-A06-p2274318	chrA06	122.18	416	0.41884	0.00768563	-1.44234
Bn-A06-p2275754	chrA06	122.18	416	0.41884	0.00768563	-1.44234
Bn-A06-p2300342	chrA06	122.18	416	0.41884	0.00768563	-1.44234
Bn-A06-p2345966	chrA06	122.18	416	0.41884	0.00768563	-1.44234
Bn-A06-p2347754	chrA06	122.18	416	0.41884	0.00768563	-1.44234
Bn-A06-p2348428	chrA06	122.18	416	0.41884	0.00768563	-1.44234
Bn-A06-p2390609	chrA06	122.18	416	0.41884	0.00768563	-1.44234
Bn-A06-p2407080	chrA06	122.18	416	0.41884	0.00768563	-1.44234
Bn-scaff_16553_1-p33772	chrA06	122.18	416	0.41884	0.00768563	-1.44234
Bn-scaff_16553_1-p34179	chrA06	122.18	416	0.41884	0.00768563	-1.44234
BrG3653	chrA06	122.18	416	0.41884	0.00768563	-1.44234
Bn-A06-p2165351	chrA06	122.58	417	0.452809	0.00830635	-1.88629
Bn-A06-p1768254	chrA06	124.2	418	0.945084	0.0172584	-2.61839
Bn-A06-p1768918	chrA06	124.2	418	0.945084	0.0172584	-2.61839
Bn-A06-p1777127	chrA06	124.2	418	0.945084	0.0172584	-2.61839
Bn-A06-p1722627	chrA06	125	419	0.994992	0.0181615	-2.54381
Bn-A06-p1685018	chrA06	125.39	420	0.96951	0.0177005	-2.09855
Bn-A06-p1685192	chrA06	125.39	420	0.96951	0.0177005	-2.09855
Bn-A06-p1481362	chrA06	127.42	421	1.17712	0.02145	-2.46197
Bn-scaff_18344_1-p679689	chrA06	127.42	421	1.17712	0.02145	-2.46197
Bn-A06-p1071392	chrA06	129.87	422	1.00847	0.0184053	-2.68912
Bn-A06-p1082496	chrA06	129.87	422	1.00847	0.0184053	-2.68912
Bn-A06-p1082655	chrA06	129.87	422	1.00847	0.0184053	-2.68912
Bn-A06-p1083892	chrA06	129.87	422	1.00847	0.0184053	-2.68912
Bn-A06-p1099469	chrA06	129.87	422	1.00847	0.0184053	-2.68912
Bn-A06-p1099939	chrA06	129.87	422	1.00847	0.0184053	-2.68912
Bn-A06-p1116930	chrA06	129.87	422	1.00847	0.0184053	-2.68912
Bn-A06-p1119681	chrA06	129.87	422	1.00847	0.0184053	-2.68912
Bn-A06-p1119751	chrA06	129.87	422	1.00847	0.0184053	-2.68912
Bn-A06-p1120102	chrA06	129.87	422	1.00847	0.0184053	-2.68912
Bn-A06-p1120107	chrA06	129.87	422	1.00847	0.0184053	-2.68912
Bn-A06-p1135789	chrA06	129.87	422	1.00847	0.0184053	-2.68912
Bn-A06-p1142557	chrA06	129.87	422	1.00847	0.0184053	-2.68912
Bn-A06-p1149034	chrA06	129.87	422	1.00847	0.0184053	-2.68912
Bn-A06-p825900	chrA06	130.65	423	1.05947	0.0193269	-2.69431
Bn-A06-p836912	chrA06	130.65	423	1.05947	0.0193269	-2.69431
Bn-A06-p853722	chrA06	130.65	423	1.05947	0.0193269	-2.69431
Bn-A06-p860631	chrA06	130.65	423	1.05947	0.0193269	-2.69431
Bn-A06-p569582	chrA06	133.11	424	1.08218	0.019737	-4.04109
Bn-A06-p428400	chrA06	133.5	425	1.07812	0.0196639	-4.21991
Bn-A06-p506366	chrA06	133.5	425	1.07812	0.0196639	-4.21991
Bn-A06-p307436	chrA06	133.89	426	1.10834	0.0202095	-4.74077
Bn-A06-p313319	chrA06	133.89	426	1.10834	0.0202095	-4.74077
Bn-A06-p313835	chrA06	133.89	426	1.10834	0.0202095	-4.74077
Bn-A06-p318331	chrA06	133.89	426	1.10834	0.0202095	-4.74077
Bn-A06-p329217	chrA06	133.89	426	1.10834	0.0202095	-4.74077
Bn-A06-p337583	chrA06	133.89	426	1.10834	0.0202095	-4.74077
Bn-A06-p364061	chrA06	133.89	426	1.10834	0.0202095	-4.74077
Bn-A06-p369746	chrA06	133.89	426	1.10834	0.0202095	-4.74077
Bn-A06-p370376	chrA06	133.89	426	1.10834	0.0202095	-4.74077
Bn-A06-p393328	chrA06	133.89	426	1.10834	0.0202095	-4.74077
Bn-A06-p205050	chrA06	134.7	427	0.80876	0.0147875	-4.08091
Bn-A06-p197604	chrA06	135.1	428	0.688093	0.0125951	-3.64377
Bn-A06-p195449	chrA06	135.49	429	0.706679	0.0129331	-3.56707
Bn-A06-p121547	chrA06	135.89	430	0.789233	0.014433	-3.98288
Bn-A06-p149145	chrA06	135.89	430	0.789233	0.014433	-3.98288
Bn-A06-p15048	chrA06	135.89	430	0.789233	0.014433	-3.98288
Bn-A06-p163388	chrA06	135.89	430	0.789233	0.014433	-3.98288
Bn-A06-p167382	chrA06	135.89	430	0.789233	0.014433	-3.98288
Bn-A06-p172171	chrA06	135.89	430	0.789233	0.014433	-3.98288
Bn-A06-p172731	chrA06	135.89	430	0.789233	0.014433	-3.98288
Bn-A06-p183811	chrA06	135.89	430	0.789233	0.014433	-3.98288
Bn-A06-p73924	chrA06	135.89	430	0.789233	0.014433	-3.98288
Bn-A07-p22513026	chrA07	0	116	0.0758758	0.00139671	-2.92875
Bn-scaff_24104_1-p359336	chrA07	0	116	0.0758758	0.00139671	-2.92875
Bn-A02-p15628202	chrA07	0.4	117	0.0519708	0.000956879	-3.19914
Bn-A07-p22096241	chrA07	0.4	117	0.0519708	0.000956879	-3.19914
Bn-A07-p22119502	chrA07	0.4	117	0.0519708	0.000956879	-3.19914
Bn-A07-p22121193	chrA07	0.4	117	0.0519708	0.000956879	-3.19914
Bn-A07-p22121263	chrA07	0.4	117	0.0519708	0.000956879	-3.19914
Bn-A07-p22136602	chrA07	0.4	117	0.0519708	0.000956879	-3.19914
Bn-A07-p22139480	chrA07	0.4	117	0.0519708	0.000956879	-3.19914
Bn-A07-p22156609	chrA07	0.4	117	0.0519708	0.000956879	-3.19914
Bn-A07-p22169573	chrA07	0.4	117	0.0519708	0.000956879	-3.19914
Bn-A07-p22176569	chrA07	0.4	117	0.0519708	0.000956879	-3.19914
Bn-A07-p22182943	chrA07	0.4	117	0.0519708	0.000956879	-3.19914
Bn-A07-p22198393	chrA07	0.4	117	0.0519708	0.000956879	-3.19914
Bn-A07-p22209952	chrA07	0.4	117	0.0519708	0.000956879	-3.19914
Bn-A07-p22231852	chrA07	0.4	117	0.0519708	0.000956879	-3.19914
Bn-A07-p22237999	chrA07	0.4	117	0.0519708	0.000956879	-3.19914
Bn-A07-p22238668	chrA07	0.4	117	0.0519708	0.000956879	-3.19914
Bn-A07-p22250567	chrA07	0.4	117	0.0519708	0.000956879	-3.19914
Bn-A07-p22253687	chrA07	0.4	117	0.0519708	0.000956879	-3.19914
Bn-A07-p22282923	chrA07	0.4	117	0.0519708	0.000956879	-3.19914
Bn-A07-p22302158	chrA07	0.4	117	0.0519708	0.000956879	-3.19914
Bn-A07-p22306994	chrA07	0.4	117	0.0519708	0.000956879	-3.19914
Bn-A07-p22307021	chrA07	0.4	117	0.0519708	0.000956879	-3.19914
Bn-A07-p22308030	chrA07	0.4	117	0.0519708	0.000956879	-3.19914
Bn-A07-p22309060	chrA07	0.4	117	0.0519708	0.000956879	-3.19914
Bn-A07-p22309183	chrA07	0.4	117	0.0519708	0.000956879	-3.19914
Bn-A07-p22310107	chrA07	0.4	117	0.0519708	0.000956879	-3.19914
Bn-A07-p22484069	chrA07	0.4	117	0.0519708	0.000956879	-3.19914
Bn-A07-p22493972	chrA07	0.4	117	0.0519708	0.000956879	-3.19914
Bn-A07-p22510199	chrA07	0.4	117	0.0519708	0.000956879	-3.19914
Bn-A07-p22510892	chrA07	0.4	117	0.0519708	0.000956879	-3.19914
Bn-A07-p22586713	chrA07	0.4	117	0.0519708	0.000956879	-3.19914
Bn-scaff_24104_1-p344071	chrA07	0.4	117	0.0519708	0.000956879	-3.19914
Bn-scaff_24104_1-p386708	chrA07	0.4	117	0.0519708	0.000956879	-3.19914
Bn-A07-p22050904	chrA07	0.8	118	0.0312711	0.000575869	-2.55728
Bn-A07-p22005058	chrA07	1.6	119	0.0374181	0.000689029	-3.17085
Bn-A07-p22005392	chrA07	1.6	119	0.0374181	0.000689029	-3.17085
Bn-A07-p22010671	chrA07	1.6	119	0.0374181	0.000689029	-3.17085
Bn-A07-p22019732	chrA07	1.6	119	0.0374181	0.000689029	-3.17085
Bn-A07-p21993375	chrA07	2.4	120	0.0419252	0.000771993	-2.46466
Bn-A07-p21994050	chrA07	2.4	120	0.0419252	0.000771993	-2.46466
Bn-A07-p21942650	chrA07	2.8	121	0.108875	0.00200353	-2.34998
Bn-A07-p21961987	chrA07	2.8	121	0.108875	0.00200353	-2.34998
Bn-A07-p21970228	chrA07	2.8	121	0.108875	0.00200353	-2.34998
Bn-A07-p21635264	chrA07	3.19	122	0.143925	0.00264769	-1.96434
Bn-A07-p21636048	chrA07	3.19	122	0.143925	0.00264769	-1.96434
Bn-A07-p21546078	chrA07	3.59	123	0.128233	0.00235936	-2.2556
Bn-A07-p21449796	chrA07	4.8	124	0.068515	0.0012613	-3.08092
Bn-A07-p21413042	chrA07	5.19	125	0.0294474	0.000542294	-2.79847
Bn-A07-p21430149	chrA07	5.19	125	0.0294474	0.000542294	-2.79847
Bn-A07-p21377298	chrA07	6	126	0.00149801	2.75939e-05	-2.62069
Bn-A07-p21173491	chrA07	6.4	127	0.0501923	0.000924148	-3.21596
Bn-A07-p21191683	chrA07	6.4	127	0.0501923	0.000924148	-3.21596
Bn-A07-p21193584	chrA07	6.4	127	0.0501923	0.000924148	-3.21596
Bn-A07-p21332273	chrA07	6.4	127	0.0501923	0.000924148	-3.21596
Bn-A07-p21337094	chrA07	6.4	127	0.0501923	0.000924148	-3.21596
Bn-A07-p21343543	chrA07	6.4	127	0.0501923	0.000924148	-3.21596
Bn-A07-p21344843	chrA07	6.4	127	0.0501923	0.000924148	-3.21596
Bn-A07-p21347324	chrA07	6.4	127	0.0501923	0.000924148	-3.21596
Bn-A07-p21354084	chrA07	6.4	127	0.0501923	0.000924148	-3.21596
Bn-A07-p21365616	chrA07	6.4	127	0.0501923	0.000924148	-3.21596
Bn-A07-p21366215	chrA07	6.4	127	0.0501923	0.000924148	-3.21596
Bn-A07-p21371577	chrA07	6.4	127	0.0501923	0.000924148	-3.21596
Bn-scaff_17799_1-p1053450	chrA07	6.4	127	0.0501923	0.000924148	-3.21596
Bn-A07-p21078249	chrA07	6.79	128	0.0225362	0.000415046	-3.52166
Bn-A07-p20986876	chrA07	7.19	129	0.0334464	0.000615916	-3.34481
Bn-A07-p20887568	chrA07	7.99	130	0.0392869	0.00072343	-3.58034
Bn-A07-p20894218	chrA07	7.99	130	0.0392869	0.00072343	-3.58034
Bn-A07-p20981410	chrA07	7.99	130	0.0392869	0.00072343	-3.58034
Bn-scaff_17799_1-p1344358	chrA07	7.99	130	0.0392869	0.00072343	-3.58034
Bn-A07-p20801106	chrA07	8.39	131	0.0186686	0.000343829	-3.16603
Bn-A07-p20801255	chrA07	8.39	131	0.0186686	0.000343829	-3.16603
Bn-A07-p20801487	chrA07	8.39	131	0.0186686	0.000343829	-3.16603
Bn-A07-p20801586	chrA07	8.39	131	0.0186686	0.000343829	-3.16603
Bn-A07-p20801762	chrA07	8.39	131	0.0186686	0.000343829	-3.16603
Bn-A07-p20732884	chrA07	8.79	132	0.0164988	0.000303872	-3.43298
Bn-A07-p20771568	chrA07	8.79	132	0.0164988	0.000303872	-3.43298
Bn-A07-p20684260	chrA07	9.19	133	0.0182567	0.000336244	-3.14109
Bn-A07-p20688218	chrA07	9.19	133	0.0182567	0.000336244	-3.14109
Bn-A07-p20688341	chrA07	9.19	133	0.0182567	0.000336244	-3.14109
Bn-A07-p20527962	chrA07	9.59	134	0.0109331	0.000201375	-2.75242
Bn-A07-p20558164	chrA07	9.59	134	0.0109331	0.000201375	-2.75242
Bn-A07-p20565057	chrA07	9.59	134	0.0109331	0.000201375	-2.75242
Bn-A07-p20571625	chrA07	9.59	134	0.0109331	0.000201375	-2.75242
Bn-A07-p20611621	chrA07	9.59	134	0.0109331	0.000201375	-2.75242
Bn-A07-p20251365	chrA07	10.37	135	1.11278e-05	2.04981e-07	-1.83515
Bn-A07-p20192092	chrA07	14.98	136	0.00474966	8.74881e-05	-0.641153
Bn-A07-p20190653	chrA07	15.35	137	0.00374035	6.88974e-05	-1.01158
Bn-A07-p19995985	chrA07	16.13	138	0.00685167	0.000126204	-1.34885
Bn-A07-p19975808	chrA07	21.17	139	0.00861176	0.000158622	-2.38139
Bn-A07-p19999651	chrA07	21.17	139	0.00861176	0.000158622	-2.38139
Bn-A07-p20000340	chrA07	21.17	139	0.00861176	0.000158622	-2.38139
Bn-scaff_19937_1-p20028	chrA07	24.46	140	0.00167164	3.07923e-05	-0.752573
Bn-A07-p19487659	chrA07	24.84	141	0.0210718	0.000388082	-1.47793
Bn-A07-p19512603	chrA07	24.84	141	0.0210718	0.000388082	-1.47793
Bn-A07-p19512916	chrA07	24.84	141	0.0210718	0.000388082	-1.47793
Bn-A07-p19515708	chrA07	24.84	141	0.0210718	0.000388082	-1.47793
Bn-A07-p19458370	chrA07	25.65	142	0.0166756	0.000307129	-0.896689
Bn-scaff_25466_1-p192846	chrA07	26.04	143	0.00171761	3.1639e-05	-0.966803
Bn-A07-p19352007	chrA07	26.84	144	0.00947091	0.000174445	-1.23595
Bn-A07-p19192373	chrA07	27.24	145	0.00441903	8.13983e-05	-0.597465
Bn-A07-p18983802	chrA07	28.04	146	0.0322508	0.000593906	-0.816167
Bn-A07-p18985169	chrA07	28.04	146	0.0322508	0.000593906	-0.816167
Bn-A07-p18990899	chrA07	28.04	146	0.0322508	0.000593906	-0.816167
Bn-A07-p19001556	chrA07	28.04	146	0.0322508	0.000593906	-0.816167
Bn-A07-p19001778	chrA07	28.04	146	0.0322508	0.000593906	-0.816167
Bn-A07-p19009397	chrA07	28.04	146	0.0322508	0.000593906	-0.816167
Bn-A07-p19028743	chrA07	28.04	146	0.0322508	0.000593906	-0.816167
Bn-A07-p19066968	chrA07	28.04	146	0.0322508	0.000593906	-0.816167
Bn-A07-p19090612	chrA07	28.04	146	0.0322508	0.000593906	-0.816167
Bn-A07-p19093712	chrA07	28.04	146	0.0322508	0.000593906	-0.816167
Bn-A07-p18021746	chrA07	38.17	147	0.00977888	0.000180117	-2.20342
Bn-A07-p18028951	chrA07	38.17	147	0.00977888	0.000180117	-2.20342
Bn-A07-p18029053	chrA07	38.17	147	0.00977888	0.000180117	-2.20342
Bn-A07-p17465762	chrA07	39.75	148	0.00314952	5.80146e-05	-2.04926
Bn-A07-p17470966	chrA07	39.75	148	0.00314952	5.80146e-05	-2.04926
Bn-A07-p17382019	chrA07	40.14	149	0.0280872	0.000517252	-2.53054
Bn-A07-p17382630	chrA07	40.14	149	0.0280872	0.000517252	-2.53054
Bn-A07-p17388536	chrA07	40.14	149	0.0280872	0.000517252	-2.53054
Bn-A07-p17388825	chrA07	40.14	149	0.0280872	0.000517252	-2.53054
Bn-A07-p17434468	chrA07	40.14	149	0.0280872	0.000517252	-2.53054
Bn-A07-p17439730	chrA07	40.14	149	0.0280872	0.000517252	-2.53054
Bn-A07-p17448936	chrA07	40.14	149	0.0280872	0.000517252	-2.53054
Bn-A07-p17068106	chrA07	40.53	150	0.0170282	0.000313622	-2.70661
Bn-A07-p17074195	chrA07	40.53	150	0.0170282	0.000313622	-2.70661
Bn-A07-p17080877	chrA07	40.53	150	0.0170282	0.000313622	-2.70661
Bn-A07-p17087544	chrA07	40.53	150	0.0170282	0.000313622	-2.70661
Bn-A07-p17104148	chrA07	40.53	150	0.0170282	0.000313622	-2.70661
Bn-A07-p17148373	chrA07	40.53	150	0.0170282	0.000313622	-2.70661
Bn-A07-p17153938	chrA07	40.53	150	0.0170282	0.000313622	-2.70661
Bn-A07-p17157365	chrA07	40.53	150	0.0170282	0.000313622	-2.70661
Bn-A07-p17160294	chrA07	40.53	150	0.0170282	0.000313622	-2.70661
Bn-A07-p17168790	chrA07	40.53	150	0.0170282	0.000313622	-2.70661
Bn-A07-p17186393	chrA07	40.53	150	0.0170282	0.000313622	-2.70661
Bn-A07-p17197152	chrA07	40.53	150	0.0170282	0.000313622	-2.70661
Bn-A07-p17212130	chrA07	40.53	150	0.0170282	0.000313622	-2.70661
Bn-A07-p17212502	chrA07	40.53	150	0.0170282	0.000313622	-2.70661
Bn-A07-p17214494	chrA07	40.53	150	0.0170282	0.000313622	-2.70661
Bn-A07-p15220175	chrA07	41.47	151	0.00344999	6.35492e-05	-2.61644
Bn-A07-p15233647	chrA07	41.47	151	0.00344999	6.35492e-05	-2.61644
Bn-A07-p15236422	chrA07	41.47	151	0.00344999	6.35492e-05	-2.61644
Bn-A07-p15239170	chrA07	41.47	151	0.00344999	6.35492e-05	-2.61644
Bn-A07-p15241878	chrA07	41.47	151	0.00344999	6.35492e-05	-2.61644
Bn-A07-p15242562	chrA07	41.47	151	0.00344999	6.35492e-05	-2.61644
Bn-A07-p15245952	chrA07	41.47	151	0.00344999	6.35492e-05	-2.61644
Bn-A07-p15247793	chrA07	41.47	151	0.00344999	6.35492e-05	-2.61644
Bn-A07-p15248927	chrA07	41.47	151	0.00344999	6.35492e-05	-2.61644
Bn-A07-p15545260	chrA07	41.47	151	0.00344999	6.35492e-05	-2.61644
Bn-A07-p15591535	chrA07	41.47	151	0.00344999	6.35492e-05	-2.61644
Bn-A07-p15591699	chrA07	41.47	151	0.00344999	6.35492e-05	-2.61644
Bn-A07-p15606996	chrA07	41.47	151	0.00344999	6.35492e-05	-2.61644
Bn-A07-p15612140	chrA07	41.47	151	0.00344999	6.35492e-05	-2.61644
Bn-A07-p15728800	chrA07	41.47	151	0.00344999	6.35492e-05	-2.61644
Bn-A07-p15738506	chrA07	41.47	151	0.00344999	6.35492e-05	-2.61644
Bn-A07-p15856545	chrA07	41.47	151	0.00344999	6.35492e-05	-2.61644
Bn-A07-p15856978	chrA07	41.47	151	0.00344999	6.35492e-05	-2.61644
Bn-A07-p15871261	chrA07	41.47	151	0.00344999	6.35492e-05	-2.61644
Bn-A07-p15872578	chrA07	41.47	151	0.00344999	6.35492e-05	-2.61644
Bn-A07-p15885711	chrA07	41.47	151	0.00344999	6.35492e-05	-2.61644
Bn-A07-p15901533	chrA07	41.47	151	0.00344999	6.35492e-05	-2.61644
Bn-A07-p15905994	chrA07	41.47	151	0.00344999	6.35492e-05	-2.61644
Bn-A07-p15913063	chrA07	41.47	151	0.00344999	6.35492e-05	-2.61644
Bn-A07-p16871286	chrA07	41.47	151	0.00344999	6.35492e-05	-2.61644
[truncated: 7,206 more rows]

## Sheet: Tab_S6
Table S6. QTL mapping results for individual batches; positions in cM on chrA03
Batch	BCI_low	pos	BCI_high	LOD score
1	7.58	8.79	12.78	19.66
2	11.58	12.78	15.57	21.97
3	5.59	11.98	17.56	6.78
4	5.59	12.78	15.17	4.28
5	11.18	16.77	16.77	11.84
6	4.79	14.77	15.57	4.18
7	11.98	12	12.378	138.4
BLUP-DI	11.98	12	12.378	116.16

## Sheet: Tab_S7
Table S7. A list of PC genes in the resistance locus, based on Darmor-bzh 4.1 assembly. Functionally annotated by Panzer2 (https://doi.org/10.1093/nar/gky350)
Gene ID	Gene name	Description Estimated PPV, description	Biological process Estimated PPV, GO-id, description	Molecular function Estimated PPV, GO-i d, description	Cellular component Estimated PPV, GO-id, description	Inverse ec2go, kegg2go
GSBRNA2T00111887001	BnaA03g29180D	0.51 Glycogen synthase kinase	0.63 GO:0006468 protein phosphorylation 0.40 GO:0007165 signal transduction	0.71 GO:0004674 protein serine/threonine kinase activity 0.55 GO:0005524 ATP binding 0.44 GO:0050321 tau-protein kinase activity	0.42 GO:0005829 cytosol	0.44 EC:2.7.11.26 GO:0050321
GSBRNA2T00111886001	BnaA03g29190D	0.56 Ribonuclease
GSBRNA2T00111885001	BnaA03g29200D	0.50 Anaphase-promoting complex subunit 11	0.73 GO:0016567 protein ubiquitination 0.48 GO:0045842 positive regulation of mitotic metaphase/anaphase transition 0.44 GO:0006511 ubiquitin-dependent protein catabolic process 0.35 GO:0007049 cell cycle 0.35 GO:0051301 cell division	0.74 GO:0004842 ubiquitin-protein transferase activity 0.48 GO:0097602 cullin family protein binding 0.45 GO:0061659 ubiquitin-like protein ligase activity 0.34 GO:0046872 metal ion binding 0.33 GO:0003676 nucleic acid binding	0.80 GO:0005680 anaphase-promoting complex 0.33 GO:0016021 integral component of membrane 0.33 GO:0005737 cytoplasm	0.74 KEGG:R03876 GO:0004842
GSBRNA2T00111883001	BnaA03g29210D	0.87 Stress-induced hydrophobic peptide	0.38 GO:0009409 response to cold		0.43 GO:0016021 integral component of membrane
GSBRNA2T00111881001	BnaA03g29220D	0.0 Uncharacterized protein
GSBRNA2T00111880001	BnaA03g29230D	0.70 Pectin acetylesterase	0.68 GO:0071555 cell wall organization	0.54 GO:0052793 pectin acetylesterase activity	0.73 GO:0005618 cell wall 0.66 GO:0005576 extracellular region 0.32 GO:0016021 integral component of membrane
GSBRNA2T00111879001	BnaA03g29240D	0.97 Germin-like protein subfamily 2 member 3	0.86 GO:0010497 plasmodesmata-mediated intercellular transport 0.86 GO:2000280 regulation of root development 0.55 GO:0009409 response to cold	0.81 GO:0045735 nutrient reservoir activity 0.73 GO:0030145 manganese ion binding	0.82 GO:0009506 plasmodesma 0.79 GO:0048046 apoplast 0.74 GO:0005618 cell wall 0.45 GO:0005634 nucleus
GSBRNA2T00111878001	BnaA03g29250D	0.0 Uncharacterized protein
GSBRNA2T00111877001	BnaA03g29260D	0.0 Uncharacterized protein
GSBRNA2T00111876001	BnaA03g29270D	0.74 T-complex protein 1 subunit gamma	0.69 GO:0006457 protein folding 0.33 GO:0006468 protein phosphorylation	0.72 GO:0051082 unfolded protein binding 0.55 GO:0005524 ATP binding 0.34 GO:0030247 polysaccharide binding 0.33 GO:0005509 calcium ion binding 0.33 GO:0004672 protein kinase activity 0.32 GO:0003677 DNA binding	0.53 GO:0005832 chaperonin-containing T-complex 0.33 GO:0009536 plastid 0.31 GO:0016021 integral component of membrane
GSBRNA2T00111875001	BnaA03g29280D	0.62 CS domain-containing protein (Fragment)	0.68 GO:0006457 protein folding 0.67 GO:0032502 developmental process 0.46 GO:0010286 heat acclimation 0.43 GO:0040007 growth 0.41 GO:0022414 reproductive process 0.40 GO:0050793 regulation of developmental process 0.40 GO:0032501 multicellular organismal process	0.69 GO:0051082 unfolded protein binding	0.51 GO:0005737 cytoplasm 0.34 GO:0016021 integral component of membrane
GSBRNA2T00111874001	BnaA03g29290D	0.56 Sugar transport protein MST4	0.69 GO:0008643 carbohydrate transport 0.55 GO:0055085 transmembrane transport 0.43 GO:0015672 monovalent inorganic cation transport 0.43 GO:0009651 response to salt stress 0.43 GO:0009414 response to water deprivation 0.43 GO:0009737 response to abscisic acid 0.34 GO:0055114 oxidation-reduction process	0.57 GO:0022857 transmembrane transporter activity 0.38 GO:0032440 2-alkenal reductase [NAD(P)+] activity	0.45 GO:0005887 integral component of plasma membrane 0.43 GO:0009506 plasmodesma 0.40 GO:0090406 pollen tube 0.35 GO:0009536 plastid	0.38 EC:1.3.1.74 GO:0032440
GSBRNA2T00111873001	BnaA03g29300D	0.37 TIR domain-containing protein (Fragment)	0.61 GO:0007165 signal transduction 0.39 GO:0042742 defense response to bacterium	0.72 GO:0043531 ADP binding 0.36 GO:0008270 zinc ion binding	0.34 GO:0016021 integral component of membrane
GSBRNA2T00111872001	BnaA03g29310D	0.43 Monosaccharide transporter	0.55 GO:0055085 transmembrane transport	0.57 GO:0022857 transmembrane transporter activity	0.43 GO:0016021 integral component of membrane
GSBRNA2T00111871001	BnaA03g29320D	0.48 ACS2 Acyl-CoA synthetase	0.52 GO:0001676 long-chain fatty acid metabolic process	0.53 GO:0102391 decanoate-CoA ligase activity 0.53 GO:0003996 acyl-CoA ligase activity 0.52 GO:0004467 long-chain fatty acid-CoA ligase activity		0.53 EC:6.2.1.3 GO:0102391
GSBRNA2T00023465001	BnaA03g57340D	0.83 The fantastic four family	0.85 GO:0010075 regulation of meristem growth		0.35 GO:0016021 integral component of membrane
GSBRNA2T00023466001	BnaA03g57350D	0.59 Glycoprotein membrane GPI-anchored			0.43 GO:0016021 integral component of membrane
GSBRNA2T00023467001	BnaA03g57360D	0.0 Uncharacterized protein
GSBRNA2T00023468001	BnaA03g57370D	0.0 Uncharacterized protein
GSBRNA2T00023469001	BnaA03g57380D	0.78 Odontogenic ameloblast-associated
GSBRNA2T00023470001	BnaA03g57390D	0.87 Trichome birefringence-like 11 isoform 1	0.40 GO:0045116 protein neddylation 0.38 GO:0007623 circadian rhythm 0.33 GO:0055114 oxidation-reduction process	0.51 GO:0016413 O-acetyltransferase activity 0.40 GO:0019781 NEDD8 activating enzyme activity 0.34 GO:0016491 oxidoreductase activity	0.48 GO:0005794 Golgi apparatus 0.43 GO:0016021 integral component of membrane	0.34 EC:1 GO:0016491
GSBRNA2T00023472001	BnaA03g57400D	0.73 Transcription factor MUTE like	0.58 GO:0010374 stomatal complex development 0.48 GO:0045893 positive regulation of transcription, DNA-templated 0.40 GO:0009913 epidermal cell differentiation 0.37 GO:0006470 protein dephosphorylation	0.69 GO:0046983 protein dimerization activity 0.45 GO:0044212 transcription regulatory region sequence-specific DNA binding 0.38 GO:0008138 protein tyrosine/serine/threonine phosphatase activity 0.36 GO:0003700 DNA-binding transcription factor activity	0.46 GO:0005634 nucleus 0.32 GO:0016021 integral component of membrane
GSBRNA2T00023473001	BnaA03g57410D	0.60 Heavy metal-associated isoprenylated plant protein 32	0.66 GO:0030001 metal ion transport	0.54 GO:0046872 metal ion binding	0.47 GO:0005618 cell wall 0.42 GO:0009506 plasmodesma
GSBRNA2T00023474001	BnaA03g57420D	0.44 Ribosomal protein S15	0.58 GO:0006412 translation	0.60 GO:0003735 structural constituent of ribosome	0.57 GO:0005840 ribosome 0.43 GO:0016021 integral component of membrane
GSBRNA2T00023476001	BnaA03g57430D	0.82 Btbpoz and math domain-containing protein 2	0.75 GO:0042631 cellular response to water deprivation 0.72 GO:0071472 cellular response to salt stress 0.61 GO:0016567 protein ubiquitination 0.50 GO:0006397 mRNA processing	0.55 GO:0005515 protein binding	0.53 GO:0005634 nucleus 0.36 GO:0016021 integral component of membrane

## Sheet: Tab_S8
Table S8. SNPeff results
#GeneName	GeneId	TranscriptId	BioType	variants_impact_HIGH	variants_impact_LOW	variants_impact_MODERATE	variants_impact_MODIFIER	variants_effect_downstream_gene_variant	variants_effect_exon_loss_variant	variants_effect_intron_variant	variants_effect_missense_variant	variants_effect_splice_acceptor_variant	variants_effect_splice_donor_variant	variants_effect_splice_region_variant	variants_effect_start_lost	variants_effect_stop_gained	variants_effect_synonymous_variant	variants_effect_transcript_ablation	variants_effect_upstream_gene_variant
Augustus	A03p029930.1_BnaEXP	TRANSCRIPT_A03p029930.1_BnaEXP	protein_coding	0	0	0	8	4	0	0	0	0	0	0	0	0	0	0	4
Augustus	A03p029940.1_BnaEXP	TRANSCRIPT_A03p029940.1_BnaEXP	protein_coding	0	0	0	26	19	0	3	0	0	0	0	0	0	0	0	4
Augustus	A03p029950.1_BnaEXP	TRANSCRIPT_A03p029950.1_BnaEXP	protein_coding	0	0	1	75	55	0	0	1	0	0	0	0	0	0	0	20
Augustus	A03p029960.1_BnaEXP	TRANSCRIPT_A03p029960.1_BnaEXP	protein_coding	1	3	11	145	47	0	10	11	0	0	0	0	1	3	0	88
Augustus	A03p029970.1_BnaEXP	TRANSCRIPT_A03p029970.1_BnaEXP	protein_coding	0	15	2	172	59	0	36	2	0	0	4	0	0	12	0	80
Augustus	A03p029980.1_BnaEXP	TRANSCRIPT_A03p029980.1_BnaEXP	protein_coding	0	16	1	175	78	0	8	1	0	0	0	0	0	16	0	89
Augustus	A03p029990.1_BnaEXP	TRANSCRIPT_A03p029990.1_BnaEXP	protein_coding	0	2	2	163	87	0	0	2	0	0	0	0	0	2	0	76
Augustus	A03p030000.1_BnaEXP	TRANSCRIPT_A03p030000.1_BnaEXP	protein_coding	0	3	2	176	78	0	0	2	0	0	0	0	0	3	0	98
Augustus	A03p030010.1_BnaEXP	TRANSCRIPT_A03p030010.1_BnaEXP	protein_coding	1	26	0	232	132	0	20	0	0	0	2	0	1	25	0	81
Augustus	A03p030010.2_BnaEXP	TRANSCRIPT_A03p030010.2_BnaEXP	protein_coding	1	26	0	232	132	0	20	0	0	0	2	0	1	25	0	81
Augustus	A03p030020.1_BnaEXP	TRANSCRIPT_A03p030020.1_BnaEXP	protein_coding	5	7	9	173	58	4	11	9	4	5	5	0	0	7	0	109
Augustus	A03p030030.1_BnaEXP	TRANSCRIPT_A03p030030.1_BnaEXP	protein_coding	0	0	0	304	156	0	0	0	0	0	0	0	0	0	0	148
Augustus	A03p030040.1_BnaEXP	TRANSCRIPT_A03p030040.1_BnaEXP	protein_coding	0	22	4	233	36	0	48	4	0	0	6	0	0	16	0	155
Augustus	A03p030050.1_BnaEXP	TRANSCRIPT_A03p030050.1_BnaEXP	protein_coding	0	34	3	288	151	0	115	3	0	0	14	0	0	21	0	35
Augustus	A03p030060.1_BnaEXP	TRANSCRIPT_A03p030060.1_BnaEXP	protein_coding	0	2	1	132	94	0	0	1	0	0	0	0	0	2	0	38
Augustus	A03p030070.1_BnaEXP	TRANSCRIPT_A03p030070.1_BnaEXP	protein_coding	0	1	4	150	63	0	1	4	0	0	0	0	0	1	0	86
Augustus	A03p030080.1_BnaEXP	TRANSCRIPT_A03p030080.1_BnaEXP	protein_coding	0	3	2	173	56	0	72	2	0	0	1	0	0	2	0	46
Augustus	A03p030090.1_BnaEXP	TRANSCRIPT_A03p030090.1_BnaEXP	protein_coding	0	0	1	142	72	0	1	1	0	0	0	0	0	0	0	69
Augustus	A03p030100.1_BnaEXP	TRANSCRIPT_A03p030100.1_BnaEXP	protein_coding	0	11	7	147	43	0	13	7	0	0	0	0	0	11	0	91
Augustus	A03p030110.1_BnaEXP	TRANSCRIPT_A03p030110.1_BnaEXP	protein_coding	0	2	2	255	150	0	16	2	0	0	0	0	0	2	0	89
Augustus	A03p030120.1_BnaEXP	TRANSCRIPT_A03p030120.1_BnaEXP	protein_coding	1	21	26	181	83	0	15	26	0	1	3	0	0	18	0	87
Augustus	A03p030120.2_BnaEXP	TRANSCRIPT_A03p030120.2_BnaEXP	protein_coding	1	20	29	179	83	0	12	29	0	1	3	0	0	18	0	87
Augustus	A03p030130.1_BnaEXP	TRANSCRIPT_A03p030130.1_BnaEXP	protein_coding	0	34	6	210	132	0	0	6	0	0	0	0	0	34	0	78
Augustus	A03p030140.1_BnaEXP	TRANSCRIPT_A03p030140.1_BnaEXP	protein_coding	0	9	2	137	20	0	28	2	0	0	3	0	0	6	0	92
Augustus	A03p030150.1_BnaEXP	TRANSCRIPT_A03p030150.1_BnaEXP	protein_coding	0	0	0	96	20	0	0	0	0	0	0	0	0	0	0	76
Augustus	A03p030150.2_BnaEXP	TRANSCRIPT_A03p030150.2_BnaEXP	protein_coding	0	0	0	96	20	0	0	0	0	0	0	0	0	0	0	76
Augustus	A03p030160.1_BnaEXP	TRANSCRIPT_A03p030160.1_BnaEXP	protein_coding	4	0	0	8	4	0	0	0	0	0	0	2	0	0	4	4
Augustus	A03p030170.1_BnaEXP	TRANSCRIPT_A03p030170.1_BnaEXP	protein_coding	0	0	0	4	4	0	0	0	0	0	0	0	0	0	0	0
Augustus	A03p030180.1_BnaEXP	TRANSCRIPT_A03p030180.1_BnaEXP	protein_coding	0	0	0	4	0	0	0	0	0	0	0	0	0	0	0	4

## Sheet: Tab_S9
Table S9. Differential Expression analysis results. rc - resistant control, ri - resistant inoculated, sc - susceptible control, si - susceptible inoculated
id	name	chr	start	stop	strand	logFC_rc_sc	AveExpr_rc_sc	t_rc_sc	P.Value_rc_sc	adj.P.Val_rc_sc	logFC_ri_rc	AveExpr_ri_rc	t_ri_rc	P.Value_ri_rc	adj.P.Val_ri_rc	logFC_si_sc	AveExpr_si_sc	t_si_sc	P.Value_si_sc	adj.P.Val_si_sc
GSBRNA2T00098483001	BnaA07g14400D	LK031787	14626	16350	+	-0.125246	1.80732	0	0.985548	1	0.71014	1.80732	0	0.789918	1	1.04064	1.80732	0.118533	0.453884	1
GSBRNA2T00098484001	BnaA07g14410D	LK031787	16451	18148	-	-0.393578	1.93476	0	0.982122	1	0.151528	1.93476	0	0.996647	1	-1.05614	1.93476	-0.169786	0.43409	1
GSBRNA2T00098489001	BnaA07g14440D	LK031787	32247	34935	+	0.154596	5.53002	0	0.999938	1	0.0272421	5.53002	0	0.999993	1	0.190824	5.53002	0	0.999887	1
GSBRNA2T00098490001	BnaA07g14450D	LK031787	36573	38353	+	0.0783946	6.75567	0	0.999998	1	-0.0158869	6.75567	0	1	1	-1.21341	6.75567	-1.73516	0.0546888	0.267321
GSBRNA2T00098495001	BnaA07g14490D	LK031787	55307	57570	+	-0.226612	3.12137	0	0.995093	1	0.163216	3.12137	0	0.996992	1	2.83451	3.12137	9.20471	5.98197e-07	3.49887e-05
GSBRNA2T00098498001	BnaA07g14510D	LK031787	72030	84270	+	0.522204	1.40887	0	0.873448	1	-0.162252	1.40887	0	0.982775	1	-0.983883	1.40887	0	0.513496	1
GSBRNA2T00098502001	BnaA07g14520D	LK031787	95833	98821	+	0.0213865	4.32697	0	0.99999	1	-0.0383679	4.32697	0	0.999982	1	0.0506544	4.32697	0	0.999964	1
GSBRNA2T00098504001	BnaA07g14540D	LK031787	102942	104841	-	-0.099211	1.57571	0	0.992503	1	-0.431624	1.57571	0	0.922635	1	1.40184	1.57571	1.34829	0.101753	0.452088
GSBRNA2T00098505001	BnaA07g14550D	LK031787	106442	108686	+	-0.5086	4.02563	0	0.949811	1	-0.185907	4.02563	0	0.991531	1	0.829618	4.02563	0	0.743849	1
GSBRNA2T00098508001	BnaA07g14570D	LK031787	113367	118111	-	-0.0341463	3.52572	0	0.999887	1	0.336433	3.52572	0	0.997181	1	0.28141	3.52572	0	0.997435	1
GSBRNA2T00098511001	BnaA07g14600D	LK031787	120265	121950	-	-0.207374	2.4249	0	0.995437	1	0.36677	2.4249	0	0.986606	1	0.376543	2.4249	0	0.984984	1
GSBRNA2T00098513001	BnaA07g14620D	LK031787	127308	129476	+	0.69563	3.08605	0	0.858335	1	-0.443816	3.08605	0	0.973293	1	1.19448	3.08605	0.71884	0.243291	0.923485
GSBRNA2T00098521001	BnaA07g14670D	LK031787	168115	170189	-	0.0626884	6.32482	0	0.999998	1	0.221657	6.32482	0	0.999983	1	-1.35497	6.32482	-2.72418	0.00953906	0.0600664
GSBRNA2T00098526001	BnaA07g14720D	LK031787	192625	199170	+	0.530074	4.5133	0	0.996796	1	-0.258921	4.5133	0	0.999903	1	-0.249726	4.5133	0	0.999709	1
GSBRNA2T00098534001	BnaA07g14740D	LK031787	225609	227174	+	-0.650983	1.27986	0	0.839125	1	-0.446724	1.27986	0	0.902326	1	-1.2426	1.27986	-0.564478	0.291754	1
GSBRNA2T00098542001	BnaA07g14810D	LK031787	273470	275951	-	-0.750698	2.6829	0	0.81122	1	0.545692	2.6829	0	0.936049	1	0.306192	2.6829	0	0.992047	1
GSBRNA2T00098544001	BnaA07g14820D	LK031787	279794	281273	-	-1.40846	5.24461	-2.50137	0.0142934	0.343069	0.444985	5.24461	0	0.996286	1	1.20065	5.24461	1.39462	0.0947314	0.425897
GSBRNA2T00098545001	BnaA07g14830D	LK031787	281749	282229	-	-0.421203	8.83629	0	0.998096	1	0.462617	8.83629	0	0.996978	1	-0.803718	8.83629	0	0.87421	1
GSBRNA2T00098546001	BnaA07g14840D	LK031787	291346	294945	+	-0.446799	3.73635	0	0.994509	1	0.121796	3.73635	0	0.999722	1	0.113114	3.73635	0	0.99982	1
GSBRNA2T00098548001	BnaA07g14850D	LK031787	296985	298748	+	-2.02097	0.970222	-1.67115	0.0610083	1	-0.0626319	0.970222	0	0.973166	1	0.971057	0.970222	0	0.529804	1
GSBRNA2T00098549001	BnaA07g14860D	LK031787	300090	302108	+	-1.18026	3.85731	-1.1001	0.146881	1	0.110721	3.85731	0	0.999831	1	-0.384679	3.85731	0	0.998904	1
GSBRNA2T00098551001	BnaA07g14880D	LK031787	309103	313780	-	1.61933	1.984	1.46478	0.0849051	1	0.677499	1.984	0	0.861754	1	-2.15902	1.984	-1.36221	0.101184	0.449699
GSBRNA2T00098553001	BnaA07g14900D	LK031787	316529	318030	+	-0.47673	2.44921	0	0.978509	1	-0.25106	2.44921	0	0.99367	1	-1.2548	2.44921	-0.835021	0.210355	0.822387
GSBRNA2T00098555001	BnaA07g14920D	LK031787	322958	324457	-	0.541722	3.93689	0	0.994645	1	-0.270185	3.93689	0	0.999831	1	0.0774815	3.93689	0	0.999939	1
GSBRNA2T00098556001	BnaA07g14930D	LK031787	324516	325935	-	-0.0128413	2.76057	0	0.999879	1	0.0373636	2.76057	0	0.99965	1	0.107633	2.76057	0	0.998347	1
GSBRNA2T00098561001	BnaA07g14980D	LK031787	344980	355782	-	-0.727275	8.08878	0	0.930285	1	0.0918533	8.08878	0	0.999903	1	0.676696	8.08878	0	0.959395	1
GSBRNA2T00098562001	BnaA07g14990D	LK031787	377039	387500	+	-0.495531	5.48622	0	0.998983	1	-0.103325	5.48622	0	0.999991	1	-0.126759	5.48622	0	0.999989	1
GSBRNA2T00098563001	BnaA07g15000D	LK031787	388122	389188	+	-0.766105	2.3973	0	0.824144	1	-0.0725532	2.3973	0	0.998388	1	-0.361023	2.3973	0	0.988043	1
GSBRNA2T00098565001	BnaA07g15020D	LK031787	391892	395693	+	0.240796	1.84151	0	0.978404	1	0.171472	1.84151	0	0.989915	1	0.538917	1.84151	0	0.892282	1
GSBRNA2T00098570001	BnaA07g15060D	LK031787	416855	419180	-	-0.10339	2.99741	0	0.999174	1	0.285368	2.99741	0	0.996291	1	0.739777	2.99741	0	0.873432	1
GSBRNA2T00098571001	BnaA07g15070D	LK031787	421026	424117	+	-3.42497	1.56392	-5.75148	5.38954e-05	0.00308109	0.462357	1.56392	0	0.842998	1	-0.628027	1.56392	0	0.928451	1
GSBRNA2T00098578001	BnaA07g15130D	LK031787	438522	439582	+	0.825086	1.10648	0	0.647577	1	-0.66072	1.10648	0	0.772638	1	1.59063	1.10648	1.34585	0.102174	0.453732
GSBRNA2T00098579001	BnaA07g15140D	LK031787	439647	440393	+	1.0896	1.0991	0.161145	0.438852	1	-0.617517	1.0991	0	0.771502	1	1.51839	1.0991	0.921716	0.188214	0.75151
GSBRNA2T00098580001	BnaA07g15150D	LK031787	444838	448903	-	-0.00549819	4.7682	0	0.999998	1	-0.312531	4.7682	0	0.99947	1	-1.10158	4.7682	-0.5539	0.295123	1
GSBRNA2T00098582001	BnaA07g15160D	LK031787	454740	457866	+	-0.834566	5.07628	0	0.862824	1	0.11089	5.07628	0	0.999965	1	0.00084948	5.07628	0	1	1
GSBRNA2T00098583001	BnaA07g15170D	LK031787	459161	460493	-	-0.292159	4.0254	0	0.999607	1	0.13545	4.0254	0	0.999919	1	-0.21644	4.0254	0	0.999728	1
GSBRNA2T00098585001	BnaA07g15180D	LK031787	490035	493383	-	-3.45608	3.08352	-5.35199	0.000100151	0.0052568	1.06549	3.08352	0.12447	0.452633	1	-0.305657	3.08352	0	0.990491	1
GSBRNA2T00098591001	BnaA07g15220D	LK031787	512958	514723	+	0.738326	3.39048	0	0.920853	1	0.0739475	3.39048	0	0.999963	1	-3.61346	3.39048	-5.60591	6.74485e-05	0.00103412
GSBRNA2T00098599001	BnaA07g15280D	LK031787	529862	533126	+	-0.473533	2.07593	0	0.936467	1	-0.510671	2.07593	0	0.889612	1	0.992678	2.07593	0	0.510398	1
GSBRNA2T00098602001	BnaA07g15300D	LK031787	541769	544740	+	0.485737	3.58344	0	0.972422	1	-0.402457	3.58344	0	0.986018	1	-2.08867	3.58344	-2.57256	0.0125709	0.0761761
GSBRNA2T00098603001	BnaA07g15310D	LK031787	545917	548268	-	-1.25551	2.43433	-0.978071	0.174076	1	0.115019	2.43433	0	0.995325	1	0.136058	2.43433	0	0.999084	1
GSBRNA2T00098604001	BnaA07g15320D	LK031787	548961	550563	-	-0.222942	3.21975	0	0.998789	1	0.0216512	3.21975	0	0.99992	1	0.947151	3.21975	0	0.609743	1
GSBRNA2T00098607001	BnaA07g15340D	LK031787	557705	559244	-	1.45777	1.89125	1.3651	0.0991601	1	-0.398483	1.89125	0	0.978448	1	0.540884	1.89125	0	0.863731	1
GSBRNA2T00098608001	BnaA07g15350D	LK031787	559626	564022	-	0.986816	3.52571	0	0.525989	1	-0.133542	3.52571	0	0.99984	1	0.569541	3.52571	0	0.963011	1
GSBRNA2T00098612001	BnaA07g15380D	LK031787	587810	591369	-	-2.21979	1.49751	-2.48028	0.014865	0.35439	0.600984	1.49751	0	0.758871	1	-0.0127652	1.49751	0	0.999195	1
GSBRNA2T00098615001	BnaA07g15390D	LK031787	615795	617174	+	-0.203884	4.59907	0	0.998169	1	0.151054	4.59907	0	0.99885	1	0.294289	4.59907	0	0.996008	1
GSBRNA2T00098619001	BnaA07g15410D	LK031787	627953	631504	-	1.27381	3.3687	1.03005	0.162074	1	-0.0826261	3.3687	0	0.999443	1	-0.550405	3.3687	0	0.878365	1
GSBRNA2T00098625001	BnaA07g15450D	LK031787	667132	670409	+	-0.588747	5.11376	0	0.996198	1	-0.0762287	5.11376	0	0.999993	1	-0.548016	5.11376	0	0.997363	1
GSBRNA2T00098627001	BnaA07g15470D	LK031787	674660	680489	+	0.102988	5.67992	0	0.999917	1	-0.346329	5.67992	0	0.998789	1	0.676548	5.67992	0	0.961267	1
GSBRNA2T00098628001	BnaA07g15480D	LK031787	680582	681617	+	0.23876	4.07708	0	0.999613	1	-0.488839	4.07708	0	0.993591	1	0.571837	4.07708	0	0.985601	1
GSBRNA2T00098632001	BnaA07g15500D	LK031787	693035	694828	+	-0.18176	1.00445	0	0.959728	1	-0.394615	1.00445	0	0.876967	1	-0.414613	1.00445	0	0.861946	1
GSBRNA2T00098634001	BnaA07g15520D	LK031787	708726	709322	+	0.100424	3.36488	0	0.998077	1	-0.200605	3.36488	0	0.994704	1	1.47074	3.36488	1.97261	0.0365225	0.189128
GSBRNA2T00098635001	BnaA07g15530D	LK031787	709591	711478	-	0.0344461	3.27724	0	0.999879	1	0.00524947	3.27724	0	0.999983	1	-1.25497	3.27724	-0.895082	0.194542	0.772025
GSBRNA2T00098639001	BnaA07g15570D	LK031787	735977	738957	+	-0.57151	3.6126	0	0.986315	1	-0.097366	3.6126	0	0.999839	1	0.265741	3.6126	0	0.999622	1
GSBRNA2T00098641001	BnaA07g15590D	LK031787	743339	745653	+	-0.676894	3.72897	0	0.911542	1	0.526804	3.72897	0	0.969583	1	-0.0513214	3.72897	0	0.999696	1
GSBRNA2T00098642001	BnaA07g15600D	LK031787	747422	750125	-	0.0675474	5.0445	0	0.999976	1	-0.234781	5.0445	0	0.999806	1	-0.13539	5.0445	0	0.99991	1
GSBRNA2T00098643001	BnaA07g15610D	LK031787	751865	753528	+	-0.2215	2.17995	0	0.988722	1	0.402082	2.17995	0	0.967946	1	0.669711	2.17995	0	0.86777	1
GSBRNA2T00098644001	BnaA07g15620D	LK031787	754959	757789	+	-0.0155595	3.19439	0	0.999904	1	-0.480073	3.19439	0	0.974887	1	-1.12119	3.19439	-0.410829	0.344378	1
GSBRNA2T00098649001	BnaA07g15660D	LK031787	767655	769654	-	-0.572862	3.32739	0	0.961156	1	0.432238	3.32739	0	0.98676	1	0.404018	3.32739	0	0.993163	1
GSBRNA2T00098651001	BnaA07g15670D	LK031787	772233	773907	+	0.179693	7.20421	0	0.999	1	-0.034974	7.20421	0	0.999866	1	0.533953	7.20421	0	0.976809	1
GSBRNA2T00098653001	BnaA07g15690D	LK031787	775721	779740	-	-0.0705623	6.0286	0	0.999976	1	0.0621487	6.0286	0	0.999979	1	-0.532133	6.0286	0	0.993584	1
GSBRNA2T00098656001	BnaA07g15700D	LK031787	785283	787470	-	-3.41894	3.98878	-12.4748	2.44029e-08	2.36178e-05	-0.264367	3.98878	0	0.993597	1	-1.54745	3.98878	-3.59243	0.00196993	0.0159119
GSBRNA2T00098661001	BnaA07g15730D	LK031787	795176	796867	-	0.901501	2.9184	0	0.699383	1	-0.626943	2.9184	0	0.971815	1	-3.79268	2.9184	-5.27263	0.000113882	0.00156638
GSBRNA2T00098663001	BnaA07g15750D	LK031787	805182	817977	+	0.195899	6.17392	0	0.999969	1	-0.24794	6.17392	0	0.999943	1	-0.0445524	6.17392	0	0.999995	1
GSBRNA2T00098666001	BnaA07g15770D	LK031787	822565	823903	+	-0.183163	4.37815	0	0.999891	1	-0.419999	4.37815	0	0.997856	1	-0.435573	4.37815	0	0.996934	1
GSBRNA2T00098670001	BnaA07g15790D	LK031787	838438	842580	+	0.0759729	6.42074	0	0.999998	1	0.227516	6.42074	0	0.999985	1	0.41996	6.42074	0	0.999802	1
GSBRNA2T00098672001	BnaA07g15810D	LK031787	843548	846572	-	-1.11874	3.40788	-0.553054	0.295403	1	0.284438	3.40788	0	0.995103	1	-1.19413	3.40788	-0.807857	0.217776	0.845483
GSBRNA2T00098675001	BnaA07g15820D	LK031787	869619	872379	+	-0.186063	2.86613	0	0.998506	1	-0.256606	2.86613	0	0.996059	1	-1.85815	2.86613	-2.45705	0.015486	0.0914244
GSBRNA2T00098676001	BnaA07g15830D	LK031787	872749	873538	+	0.189878	2.47068	0	0.996763	1	0.164503	2.47068	0	0.998146	1	-1.92784	2.47068	-2.15047	0.0267798	0.14575
GSBRNA2T00098679001	BnaA07g15860D	LK031787	886059	886649	-	-3.67591	0.172109	-3.22738	0.00387549	0.117711	0.529321	0.172109	0	0.75464	1	0.686737	0.172109	0	0.78283	1
GSBRNA2T00098682001	BnaA07g15890D	LK031787	893846	895537	+	0.113339	5.37365	0	0.999982	1	-0.665046	5.37365	0	0.98145	1	-0.679992	5.37365	0	0.972837	1
GSBRNA2T00098683001	BnaA07g15900D	LK031787	896354	898145	-	-0.37606	7.83829	0	0.999839	1	0.0851777	7.83829	0	0.999996	1	0.0248427	7.83829	0	0.999999	1
GSBRNA2T00098684001	BnaA07g15910D	LK031787	898938	900046	-	-2.66498	0.574428	-3.13345	0.00453267	0.134605	-0.358432	0.574428	0	0.846833	1	-1.00107	0.574428	-0.00262545	0.499186	1
GSBRNA2T00098685001	BnaA07g15920D	LK031787	900133	901930	-	-1.45953	1.81861	-1.53645	0.0757267	1	0.232789	1.81861	0	0.978487	1	-0.782377	1.81861	0	0.768253	1
GSBRNA2T00098686001	BnaA07g15930D	LK031787	902064	905248	+	0.00575523	3.17648	0	0.999985	1	-0.0880925	3.17648	0	0.999727	1	0.169815	3.17648	0	0.999077	1
GSBRNA2T00098687001	BnaA07g15940D	LK031787	910852	914725	+	-0.770654	5.62036	0	0.918617	1	0.113876	5.62036	0	0.999941	1	0.770682	5.62036	0	0.927167	1
GSBRNA2T00098688001	BnaA07g15950D	LK031787	915192	916475	-	-0.519816	5.29452	0	0.986485	1	0.441772	5.29452	0	0.993524	1	0.441491	5.29452	0	0.994499	1
GSBRNA2T00098689001	BnaA07g15960D	LK031787	917199	919731	+	-0.350106	5.65862	0	0.999455	1	0.171822	5.65862	0	0.999921	1	0.119935	5.65862	0	0.999958	1
GSBRNA2T00098691001	BnaA07g15980D	LK031787	924481	927541	+	-0.922979	2.0691	0	0.587353	1	0.173327	2.0691	0	0.98011	1	0.0157625	2.0691	0	0.999276	1
GSBRNA2T00098693001	BnaA07g16000D	LK031787	933666	937592	+	-0.154384	1.76286	0	0.991834	1	0.362239	1.76286	0	0.971286	1	-2.28269	1.76286	-2.31558	0.020005	0.113982
GSBRNA2T00098702001	BnaA07g16060D	LK031787	975614	978449	-	0.464966	4.50787	0	0.995654	1	0.376377	4.50787	0	0.998829	1	-1.23077	4.50787	-1.02663	0.162844	0.66755
GSBRNA2T00098703001	BnaA07g16070D	LK031787	982884	984978	-	-0.386421	1.59837	0	0.967115	1	-0.534787	1.59837	0	0.89289	1	0.249558	1.59837	0	0.987377	1
GSBRNA2T00098708001	BnaA07g16120D	LK031787	1035959	1036964	-	-2.31276	1.54349	-3.22712	0.00381559	0.116269	1.10974	1.54349	0.243944	0.406076	1	0.278238	1.54349	0	0.992087	1
GSBRNA2T00098712001	BnaA07g16150D	LK031787	1042471	1043473	-	-0.438728	4.04655	0	0.995845	1	0.494009	4.04655	0	0.992918	1	0.211889	4.04655	0	0.999637	1
GSBRNA2T00098714001	BnaA07g16170D	LK031787	1047620	1049352	+	-0.0584785	4.34374	0	0.99996	1	-0.0303543	4.34374	0	0.999979	1	-0.883117	4.34374	0	0.717758	1
GSBRNA2T00098715001	BnaA07g16180D	LK031787	1049651	1053838	-	0.860965	1.86635	0	0.609346	1	-0.360793	1.86635	0	0.916086	1	-0.685823	1.86635	0	0.685635	1
GSBRNA2T00098716001	BnaA07g16190D	LK031787	1060419	1062309	+	0.240259	4.53965	0	0.999566	1	-0.180967	4.53965	0	0.999775	1	0.577547	4.53965	0	0.984064	1
GSBRNA2T00098717001	BnaA07g16200D	LK031787	1064341	1065979	-	0.370915	5.86541	0	0.999759	1	0.387349	5.86541	0	0.999768	1	1.29692	5.86541	2.29908	0.0205612	0.116565
GSBRNA2T00098723001	BnaA07g16240D	LK031787	1086950	1090928	+	0.281538	4.31304	0	0.999563	1	-0.158218	4.31304	0	0.999898	1	1.01429	4.31304	0.0901805	0.464847	1
GSBRNA2T00098727001	BnaA07g16250D	LK031787	1095303	1097141	-	0.631643	2.89909	0	0.85448	1	0.179791	2.89909	0	0.990567	1	-5.57541	2.89909	-3.31733	0.0034943	0.0256283
GSBRNA2T00098730001	BnaA07g16270D	LK031787	1102583	1103605	+	-0.239298	1.76505	0	0.988055	1	0.24683	1.76505	0	0.98771	1	-1.40699	1.76505	-0.957467	0.179067	0.721289
GSBRNA2T00098732001	BnaA07g16280D	LK031787	1105603	1107915	+	-0.208678	3.39775	0	0.999348	1	0.027038	3.39775	0	0.999942	1	0.177475	3.39775	0	0.999459	1
GSBRNA2T00098733001	BnaA07g16290D	LK031787	1107976	1108998	-	-0.367696	3.39664	0	0.995595	1	0.730775	3.39664	0	0.905563	1	0.104658	3.39664	0	0.999631	1
GSBRNA2T00098734001	BnaA07g16300D	LK031787	1111210	1112947	+	-0.0819456	3.3652	0	0.999805	1	0.348582	3.3652	0	0.997657	1	0.674616	3.3652	0	0.945879	1
GSBRNA2T00098736001	BnaA07g16320D	LK031787	1127074	1129790	+	0.0655624	2.64845	0	0.999582	1	-0.170717	2.64845	0	0.998474	1	0.460655	2.64845	0	0.982591	1
GSBRNA2T00098738001	BnaA07g16330D	LK031787	1134245	1135273	-	-0.62121	2.81233	0	0.886256	1	0.521524	2.81233	0	0.931212	1	-0.0932903	2.81233	0	0.996593	1
GSBRNA2T00098739001	BnaA07g16340D	LK031787	1135973	1138118	-	0.509656	4.1714	0	0.993532	1	-0.0701524	4.1714	0	0.999967	1	0.718588	4.1714	0	0.935849	1
GSBRNA2T00098740001	BnaA07g16350D	LK031787	1148971	1153136	+	-0.69511	2.38106	0	0.848646	1	-0.00333669	2.38106	0	0.999844	1	1.2056	2.38106	0.899578	0.19339	0.768142
GSBRNA2T00098741001	BnaA07g16360D	LK031787	1154454	1160262	-	-0.126906	4.13547	0	0.999972	1	-0.0641847	4.13547	0	0.999987	1	-0.149353	4.13547	0	0.999937	1
GSBRNA2T00098742001	BnaA07g16370D	LK031787	1160555	1163161	-	-0.141759	1.75346	0	0.993672	1	0.365368	1.75346	0	0.974762	1	-0.463593	1.75346	0	0.920056	1
GSBRNA2T00098743001	BnaA07g16380D	LK031787	1163601	1166009	-	-0.057401	4.13312	0	0.999981	1	0.0712873	4.13312	0	0.999976	1	-0.339697	4.13312	0	0.998883	1
GSBRNA2T00098744001	BnaA07g16390D	LK031787	1166148	1167548	+	0.00906313	1.60455	0	0.999691	1	0.0695883	1.60455	0	0.997781	1	-0.979183	1.60455	0	0.520599	1
GSBRNA2T00098747001	BnaA07g16410D	LK031787	1170219	1172354	-	-1.34477	5.12123	-2.17357	0.0256983	0.554683	0.210062	5.12123	0	0.999739	1	-0.905031	5.12123	0	0.71845	1
GSBRNA2T00098748001	BnaA07g16420D	LK031787	1173140	1176698	-	-0.395855	3.53983	0	0.980729	1	-0.641748	3.53983	0	0.87853	1	-2.62265	3.53983	-3.60089	0.00194255	0.0157223
GSBRNA2T00098750001	BnaA07g16440D	LK031787	1187348	1190278	+	-0.878982	3.24634	0	0.595166	1	1.99958	3.24634	2.07452	0.0306154	1	-8.33602	3.24634	-3.02421	0.00676601	0.0447507
GSBRNA2T00098752001	BnaA07g16450D	LK031787	1193287	1194657	+	0.840895	0.882475	0	0.621731	1	-0.103369	0.882475	0	0.980596	1	2.31631	0.882475	2.85723	0.00749153	0.0487266
GSBRNA2T00098753001	BnaA07g16460D	LK031787	1195340	1197205	+	0.20997	3.26766	0	0.999659	1	-0.122136	3.26766	0	0.99988	1	-0.726077	3.26766	0	0.88295	1
GSBRNA2T00098757001	BnaA07g16490D	LK031787	1218477	1220600	+	-0.318591	4.78615	0	0.9994	1	0.137651	4.78615	0	0.999909	1	-2.2606	4.78615	-5.67415	6.0481e-05	0.000952413
GSBRNA2T00098758001	BnaA07g16500D	LK031787	1227048	1234093	+	-3.05204	1.61307	-6.49632	1.79992e-05	0.00120306	-0.0210095	1.61307	0	0.997229	1	-8.27484	1.61307	-7.03686	9.28666e-06	0.000241884
GSBRNA2T00098759001	BnaA07g16510D	LK031787	1247527	1250007	+	2.50871	1.98057	3.31674	0.00324414	0.101878	0.204621	1.98057	0	0.995788	1	2.5061	1.98057	3.21832	0.00387972	0.0280506
GSBRNA2T00098762001	BnaA07g16540D	LK031787	1255578	1256400	-	-0.194588	3.83949	0	0.999743	1	-0.00406964	3.83949	0	0.999996	1	0.087784	3.83949	0	0.999903	1
GSBRNA2T00098764001	BnaA07g16550D	LK031787	1260246	1263929	+	0.271574	3.86895	0	0.999048	1	0.629581	3.86895	0	0.976855	1	-0.148047	3.86895	0	0.999302	1
GSBRNA2T00098767001	BnaA07g16580D	LK031787	1283337	1285082	-	-0.285798	1.42997	0	0.982265	1	-0.327081	1.42997	0	0.966556	1	0.105124	1.42997	0	0.99503	1
GSBRNA2T00098772001	BnaA07g16590D	LK031787	1296562	1298542	+	-0.0675127	4.76388	0	0.999995	1	-0.0750401	4.76388	0	0.999993	1	-0.319125	4.76388	0	0.999783	1
GSBRNA2T00098773001	BnaA07g16600D	LK031787	1299610	1301551	+	-0.637225	3.09819	0	0.928003	1	0.381984	3.09819	0	0.988007	1	-0.53447	3.09819	0	0.956472	1
GSBRNA2T00098774001	BnaA07g16610D	LK031787	1303286	1304885	+	0.340886	1.95001	0	0.955949	1	-0.274201	1.95001	0	0.971536	1	-0.0649088	1.95001	0	0.990015	1
GSBRNA2T00098775001	BnaA07g16620D	LK031787	1305072	1308499	-	2.07133	2.12636	3.95769	0.00102864	0.0386049	0.190461	2.12636	0	0.999719	1	-0.969323	2.12636	0	0.527409	1
GSBRNA2T00098783001	BnaA07g16670D	LK031787	1398777	1400214	+	0.534246	1.84924	0	0.892248	1	-0.491206	1.84924	0	0.911764	1	0.414596	1.84924	0	0.920573	1
GSBRNA2T00098786001	BnaA07g16690D	LK031787	1405787	1407517	-	-0.418968	3.19964	0	0.986489	1	0.161513	3.19964	0	0.99805	1	0.737669	3.19964	0	0.882513	1
GSBRNA2T00098787001	BnaA07g16700D	LK031787	1413003	1415250	+	0.273387	3.68082	0	0.9993	1	0.187686	3.68082	0	0.999763	1	-5.31186	3.68082	-6.85619	1.11262e-05	0.000274116
GSBRNA2T00098788001	BnaA07g16710D	LK031787	1416415	1418119	-	1.32388	2.51073	1.23529	0.120673	1	-1.80468	2.51073	-2.75712	0.00898388	0.86717	-0.58533	2.51073	0	0.853566	1
GSBRNA2T00098790001	BnaA07g16730D	LK031787	1424355	1425358	-	-0.200328	3.632	0	0.999112	1	0.198309	3.632	0	0.999131	1	-0.294454	3.632	0	0.996304	1
GSBRNA2T00098794001	BnaA07g16750D	LK031787	1436128	1439078	+	-0.275442	3.01958	0	0.978068	1	0.416191	3.01958	0	0.953632	1	1.17544	3.01958	0.615024	0.275256	1
GSBRNA2T00098796001	BnaA07g16770D	LK031787	1441445	1443668	-	-0.221592	5.18796	0	0.999967	1	0.345045	5.18796	0	0.99986	1	0.307558	5.18796	0	0.999908	1
GSBRNA2T00098799001	BnaA07g16800D	LK031787	1460232	1461392	-	-0.24351	5.17586	0	0.999958	1	0.0502253	5.17586	0	0.999997	1	-1.62365	5.17586	-4.05753	0.00086322	0.00801085
GSBRNA2T00098800001	BnaA07g16810D	LK031787	1492786	1494660	+	0.396811	1.63476	0	0.955849	1	-0.527696	1.63476	0	0.90772	1	-0.00819437	1.63476	0	0.99911	1
GSBRNA2T00098803001	BnaA07g16820D	LK031787	1500785	1502167	-	-0.439305	5.6122	0	0.997912	1	0.505185	5.6122	0	0.995629	1	0.707395	5.6122	0	0.959627	1
GSBRNA2T00098808001	BnaA07g16850D	LK031787	1523917	1525807	-	0.642986	4.42182	0	0.918797	1	0.297763	4.42182	0	0.996878	1	4.16725	4.42182	14.9577	3.39198e-09	1.5183e-06
GSBRNA2T00098811001	BnaA07g16860D	LK031787	1535473	1540141	-	0.55642	4.2486	0	0.994779	1	-0.385549	4.2486	0	0.999455	1	0.277299	4.2486	0	0.99967	1
GSBRNA2T00098813001	BnaA07g16880D	LK031787	1542313	1543949	-	0.0166102	4.42604	0	0.999975	1	0.147626	4.42604	0	0.999739	1	0.212376	4.42604	0	0.999286	1
GSBRNA2T00098814001	BnaA07g16890D	LK031787	1544369	1547813	-	0.532235	4.83806	0	0.997219	1	0.00704363	4.83806	0	0.999999	1	-2.22165	4.83806	-5.87059	4.48812e-05	0.000761993
GSBRNA2T00098820001	BnaA07g16920D	LK031787	1577203	1578883	+	0.761414	3.01427	0	0.804897	1	-0.514919	3.01427	0	0.95805	1	1.32021	3.01427	1.20394	0.126396	0.541776
GSBRNA2T00098823001	BnaA07g16950D	LK031787	1594110	1596057	-	0.201619	3.15671	0	0.998823	1	-0.0261824	3.15671	0	0.999921	1	-0.25672	3.15671	0	0.995238	1
GSBRNA2T00098824001	BnaA07g16960D	LK031787	1596413	1597939	-	-0.114685	6.631	0	0.999996	1	-0.0427963	6.631	0	0.999999	1	-0.542387	6.631	0	0.998625	1
GSBRNA2T00098829001	BnaA07g17000D	LK031787	1607839	1610493	+	2.87086	-0.116857	1.93728	0.0397591	0.783285	0.562491	-0.116857	0	0.750826	1	7.33113	-0.116857	7.69432	3.82161e-06	0.000132939
GSBRNA2T00098831001	BnaA07g17020D	LK031787	1615628	1617772	+	0.11139	4.58837	0	0.999887	1	-0.0096339	4.58837	0	0.999992	1	-0.615772	4.58837	0	0.962964	1
GSBRNA2T00098834001	BnaA07g17040D	LK031787	1626600	1629067	+	-1.00608	2.61866	-0.0219572	0.491435	1	-0.305689	2.61866	0	0.971353	1	-0.0579702	2.61866	0	0.999108	1
GSBRNA2T00098835001	BnaA07g17050D	LK031787	1629173	1630661	-	0.0239766	4.34965	0	0.999962	1	0.127146	4.34965	0	0.999781	1	0.898974	4.34965	0	0.708139	1
GSBRNA2T00098844001	BnaA07g17130D	LK031787	1673494	1675417	-	0.143972	2.32181	0	0.98675	1	-0.195334	2.32181	0	0.979914	1	-1.54948	2.32181	-0.962457	0.178229	0.718569
GSBRNA2T00098845001	BnaA07g17140D	LK031787	1677457	1679228	+	0.0643622	1.77566	0	0.999145	1	0.192393	1.77566	0	0.997388	1	-2.19005	1.77566	-2.67252	0.0104864	0.0651142
GSBRNA2T00098847001	BnaA07g17160D	LK031787	1680975	1683417	+	-0.308473	2.89264	0	0.997607	1	0.292802	2.89264	0	0.997921	1	-0.502929	2.89264	0	0.975577	1
GSBRNA2T00098848001	BnaA07g17170D	LK031787	1683852	1685544	+	0.539013	2.28265	0	0.956393	1	-0.256312	2.28265	0	0.995993	1	0.773091	2.28265	0	0.803518	1
GSBRNA2T00098851001	BnaA07g17180D	LK031787	1698035	1700232	+	0.876653	0.845119	0	0.583696	1	-0.519078	0.845119	0	0.804632	1	-0.141438	0.845119	0	0.939149	1
GSBRNA2T00098853001	BnaA07g17200D	LK031787	1705445	1707088	-	-1.21099	6.59262	-1.144	0.137929	1	0.349538	6.59262	0	0.99752	1	-0.0106901	6.59262	0	0.999986	1
GSBRNA2T00098856001	BnaA07g17230D	LK031787	1722567	1723919	-	-3.35492	2.97419	-2.47016	0.0154809	0.36738	5.00368	2.97419	4.43059	0.000467745	0.116569	8.76793	2.97419	20.1155	1.3506e-10	3.73626e-07
GSBRNA2T00098857001	BnaA07g17240D	LK031787	1732950	1734359	+	-0.0692019	2.34647	0	0.998473	1	0.286452	2.34647	0	0.991007	1	1.09266	2.34647	0.376755	0.356606	1
GSBRNA2T00098858001	BnaA07g17250D	LK031787	1734959	1735729	+	-0.38999	0.978902	0	0.903441	1	0.0783771	0.978902	0	0.983422	1	0.952861	0.978902	0	0.54646	1
GSBRNA2T00098859001	BnaA07g17260D	LK031787	1736266	1741770	-	0.345871	4.94442	0	0.999756	1	-0.168493	4.94442	0	0.999973	1	0.944244	4.94442	0	0.655776	1
GSBRNA2T00098873001	BnaA07g17350D	LK031787	1800537	1803669	-	0.0892515	5.17102	0	0.999882	1	-0.564541	5.17102	0	0.981988	1	-0.484215	5.17102	0	0.989862	1
GSBRNA2T00098874001	BnaA07g17360D	LK031787	1809037	1814938	+	0.0396401	4.05433	0	0.999794	1	0.775149	4.05433	0	0.861254	1	2.14684	4.05433	6.03617	3.50488e-05	0.00063429
GSBRNA2T00098876001	BnaA07g17380D	LK031787	1822951	1824742	-	-3.50054	1.3106	-5.55865	7.25062e-05	0.00399037	0.232743	1.3106	0	0.921184	1	-0.320093	1.3106	0	0.993222	1
GSBRNA2T00098879001	BnaA07g17400D	LK031787	1853098	1856307	+	0.642839	4.67981	0	0.985798	1	-0.349314	4.67981	0	0.999699	1	-0.271591	4.67981	0	0.999608	1
GSBRNA2T00098889001	BnaA07g17480D	LK031787	1898357	1899376	+	0.125369	2.06459	0	0.989435	1	-0.255289	2.06459	0	0.972025	1	0.504512	2.06459	0	0.904413	1
GSBRNA2T00098895001	BnaA07g17500D	LK031787	1912429	1915507	-	-0.514016	0.917477	0	0.830336	1	-0.244278	0.917477	0	0.921324	1	-1.84656	0.917477	-1.15679	0.136561	0.577628
GSBRNA2T00098896001	BnaA07g17510D	LK031787	1919186	1921062	-	0.16454	5.08037	0	0.999985	1	-0.144046	5.08037	0	0.999988	1	0.551545	5.08037	0	0.997724	1
GSBRNA2T00098897001	BnaA07g17520D	LK031787	1922517	1925894	-	-0.168969	6.59138	0	0.999978	1	-0.283788	6.59138	0	0.999907	1	-0.680451	6.59138	0	0.981651	1
GSBRNA2T00098898001	BnaA07g17530D	LK031787	1931045	1934925	+	-0.100277	4.98097	0	0.999983	1	-0.081522	4.98097	0	0.999986	1	-0.207531	4.98097	0	0.999909	1
GSBRNA2T00098899001	BnaA07g17540D	LK031787	1935318	1936526	+	0.0957339	3.52314	0	0.999803	1	-0.121748	3.52314	0	0.999728	1	0.578069	3.52314	0	0.976784	1
GSBRNA2T00098901001	BnaA07g17560D	LK031787	1939598	1941058	-	-0.115623	3.23796	0	0.999669	1	-0.329529	3.23796	0	0.996232	1	-0.945262	3.23796	0	0.585573	1
GSBRNA2T00098909001	BnaA07g17620D	LK031787	1980122	1982988	-	-0.44851	3.13228	0	0.982027	1	0.468297	3.13228	0	0.979397	1	0.156441	3.13228	0	0.998495	1
GSBRNA2T00098912001	BnaA07g17650D	LK031787	1995481	1996925	-	-0.652553	2.04457	0	0.817806	1	0.0368194	2.04457	0	0.99524	1	0.168468	2.04457	0	0.985554	1
GSBRNA2T00098913001	BnaA07g17660D	LK031787	1997168	1999079	+	0.941101	1.45566	0	0.563794	1	-0.0574622	1.45566	0	0.997807	1	0.753596	1.45566	0	0.728246	1
GSBRNA2T00098921001	BnaA07g17740D	LK031787	2022061	2023725	-	6.29124	-0.931042	6.35317	2.30586e-05	0.00148948	-0.254238	-0.931042	0	0.974215	1	1.26448	-0.931042	0.233959	0.444202	1
GSBRNA2T00098923001	BnaA07g17760D	LK031787	2024986	2030185	-	1.2072	3.83359	1.02971	0.162149	1	-0.184075	3.83359	0	0.999722	1	0.506019	3.83359	0	0.974582	1
GSBRNA2T00098927001	BnaA07g17800D	LK031787	2049968	2053264	+	0.439274	4.0527	0	0.995517	1	0.213552	4.0527	0	0.999743	1	0.674935	4.0527	0	0.948384	1
GSBRNA2T00098931001	BnaA07g17830D	LK031787	2059660	2062289	-	1.9784	0.913693	2.01401	0.0340238	0.695374	0.0601157	0.913693	0	0.996983	1	-0.205943	0.913693	0	0.919284	1
GSBRNA2T00098933001	BnaA07g17850D	LK031787	2070595	2072913	+	1.29151	4.61783	1.15284	0.13618	1	-0.0934843	4.61783	0	0.999283	1	0.245612	4.61783	0	0.989488	1
GSBRNA2T00098934001	BnaA07g17860D	LK031787	2072970	2075192	-	-0.474445	3.15874	0	0.979328	1	-0.34545	3.15874	0	0.987081	1	-0.240664	3.15874	0	0.995848	1
GSBRNA2T00098936001	BnaA07g17880D	LK031787	2076944	2078620	-	-1.96784	2.48709	-3.53216	0.00219547	0.0727689	-0.225699	2.48709	0	0.977019	1	-0.210618	2.48709	0	0.99863	1
GSBRNA2T00098937001	BnaA07g17890D	LK031787	2080022	2083804	+	7.69083	-0.391601	6.61754	1.63521e-05	0.00110974	-0.162557	-0.391601	0	0.99509	1	0.471997	-0.391601	0	0.801107	1
GSBRNA2T00098938001	BnaA07g17900D	LK031787	2084012	2084747	-	-0.205463	3.11792	0	0.99785	1	-0.0864611	3.11792	0	0.999218	1	-3.80289	3.11792	-4.86447	0.000220653	0.0026452
GSBRNA2T00098939001	BnaA07g17910D	LK031787	2085229	2088487	-	0.319312	3.66202	0	0.999098	1	-0.24107	3.66202	0	0.999632	1	-0.20712	3.66202	0	0.999204	1
GSBRNA2T00098940001	BnaA07g17920D	LK031787	2089371	2092845	+	0.495015	5.0709	0	0.997536	1	-0.162004	5.0709	0	0.999958	1	0.504283	5.0709	0	0.996724	1
GSBRNA2T00098941001	BnaA07g17930D	LK031787	2092912	2096261	-	0.347996	4.05447	0	0.999379	1	-0.353629	4.05447	0	0.999346	1	0.205736	4.05447	0	0.999771	1
GSBRNA2T00098942001	BnaA07g17940D	LK031787	2096997	2098244	+	-0.481633	4.62602	0	0.997968	1	0.22792	4.62602	0	0.999883	1	-0.257196	4.62602	0	0.999819	1
GSBRNA2T00098943001	BnaA07g17950D	LK031787	2098709	2100482	-	0.149868	3.41464	0	0.998653	1	0.0237849	3.41464	0	0.999855	1	0.25761	3.41464	0	0.995252	1
GSBRNA2T00098944001	BnaA07g17960D	LK031787	2101459	2109441	-	-1.41612	2.97875	-1.75664	0.05276	0.977308	-0.459276	2.97875	0	0.953298	1	-1.55	2.97875	-2.02416	0.033399	0.17562
GSBRNA2T00098945001	BnaA07g17970D	LK031787	2111159	2112687	-	-0.607932	0.934292	0	0.897786	1	0.0443583	0.934292	0	0.997745	1	-2.78121	0.934292	-3.48377	0.00240069	0.0187645
GSBRNA2T00098947001	BnaA07g17990D	LK031787	2115717	2118361	+	-1.03918	4.61774	-0.282858	0.391154	1	0.238558	4.61774	0	0.999881	1	-0.331486	4.61774	0	0.999806	1
GSBRNA2T00098948001	BnaA07g18000D	LK031787	2118905	2120440	+	-0.671505	2.84771	0	0.889449	1	-0.199701	2.84771	0	0.992558	1	-2.09212	2.84771	-2.75228	0.0090662	0.0575637
GSBRNA2T00098949001	BnaA07g18010D	LK031787	2120761	2121716	-	0.485416	0.807411	0	0.921868	1	-0.360771	0.807411	0	0.961576	1	-1.23194	0.807411	-0.468564	0.324462	1
GSBRNA2T00098950001	BnaA07g18020D	LK031787	2121953	2123390	-	0.122272	4.78343	0	0.999972	1	0.113689	4.78343	0	0.999978	1	0.146954	4.78343	0	0.999947	1
GSBRNA2T00098953001	BnaA07g18040D	LK031787	2145956	2148826	-	-0.0185655	4.85238	0	0.999998	1	0.298166	4.85238	0	0.999889	1	1.48516	4.85238	3.78799	0.00138887	0.0117978
GSBRNA2T00098955001	BnaA07g18060D	LK031787	2159716	2163677	-	-0.00541962	3.09071	0	0.999989	1	-0.83376	3.09071	0	0.769726	1	-1.70656	3.09071	-2.39603	0.0172828	0.10049
GSBRNA2T00098956001	BnaA07g18070D	LK031787	2169206	2170726	-	-0.310083	2.14617	0	0.989874	1	0.338538	2.14617	0	0.987909	1	-0.191591	2.14617	0	0.993848	1
GSBRNA2T00098961001	BnaA07g18110D	LK031787	2185487	2192082	-	0.0931324	5.1454	0	0.99997	1	0.0311171	5.1454	0	0.999992	1	0.00526526	5.1454	0	0.999998	1
GSBRNA2T00098963001	BnaA07g18130D	LK031787	2197025	2200079	-	0.831926	2.77835	0	0.776108	1	-0.366981	2.77835	0	0.996213	1	0.748646	2.77835	0	0.851775	1
GSBRNA2T00098968001	BnaA07g18150D	LK031787	2209068	2210711	+	-0.75745	1.79819	0	0.769909	1	0.280467	1.79819	0	0.973391	1	-0.609024	1.79819	0	0.861832	1
GSBRNA2T00098969001	BnaA07g18160D	LK031787	2211354	2214388	+	0.262399	4.14197	0	0.995438	1	-0.326923	4.14197	0	0.992106	1	-0.752269	4.14197	0	0.796747	1
GSBRNA2T00098970001	BnaA07g18170D	LK031787	2214707	2225382	+	0.276941	4.41552	0	0.998676	1	-0.600711	4.41552	0	0.968067	1	-1.08838	4.41552	-0.373622	0.357739	1
GSBRNA2T00098971001	BnaA07g18180D	LK031787	2226771	2230103	+	-0.0602724	3.88111	0	0.999977	1	0.145177	3.88111	0	0.999931	1	-0.58523	3.88111	0	0.979229	1
GSBRNA2T00098974001	BnaA07g18210D	LK031787	2239658	2243217	+	0.0947763	2.97133	0	0.999361	1	0.13146	2.97133	0	0.999234	1	-0.798837	2.97133	0	0.752902	1
GSBRNA2T00098975001	BnaA07g18220D	LK031787	2243616	2245464	+	-0.443775	1.64892	0	0.922331	1	0.651363	1.64892	0	0.826566	1	0.927736	1.64892	0	0.588393	1
GSBRNA2T00098984001	BnaA07g18310D	LK031787	2268146	2270797	+	0.360554	2.41958	0	0.970841	1	0.0938079	2.41958	0	0.997302	1	0.993735	2.41958	0	0.508143	1
GSBRNA2T00098986001	BnaA07g18330D	LK031787	2275069	2277230	+	-0.540771	2.77761	0	0.970424	1	0.348343	2.77761	0	0.993106	1	-0.584443	2.77761	0	0.942217	1
GSBRNA2T00098992001	BnaA07g18380D	LK031787	2294330	2295816	+	0.393457	2.17421	0	0.93667	1	0.581678	2.17421	0	0.882174	1	-6.5153	2.17421	-3.73747	0.00167055	0.0138062
GSBRNA2T00098993001	BnaA07g18390D	LK031787	2296368	2298053	+	0.331042	3.58957	0	0.999048	1	0.194362	3.58957	0	0.999868	1	0.344891	3.58957	0	0.998324	1
GSBRNA2T00098997001	BnaA07g18420D	LK031787	2306843	2307955	-	-0.480957	3.21219	0	0.963918	1	1.02806	3.21219	0.113634	0.455745	1	0.916841	3.21219	0	0.637864	1
GSBRNA2T00098998001	BnaA07g18430D	LK031787	2315671	2319909	+	2.53754	0.748796	2.60436	0.0118983	0.2933	-2.15726	0.748796	-2.16897	0.0259499	1	0.386366	0.748796	0	0.82819	1
GSBRNA2T00098999001	BnaA07g18440D	LK031787	2322040	2322979	+	0.34142	1.59883	0	0.944964	1	0.0672392	1.59883	0	0.993995	1	0.685614	1.59883	0	0.778342	1
GSBRNA2T00099000001	BnaA07g18450D	LK031787	2323049	2326861	-	0.139979	3.99266	0	0.999883	1	-0.0601016	3.99266	0	0.999964	1	1.50097	3.99266	3.26577	0.00355478	0.0259928
GSBRNA2T00099006001	BnaA07g18500D	LK031787	2346331	2348022	-	0.0217919	2.9008	0	0.999958	1	-0.0540363	2.9008	0	0.99989	1	-0.506897	2.9008	0	0.97429	1
GSBRNA2T00099007001	BnaA07g18510D	LK031787	2348779	2355305	-	-0.236554	5.07651	0	0.999976	1	-0.0132392	5.07651	0	0.999999	1	-0.639301	5.07651	0	0.991153	1
GSBRNA2T00099008001	BnaA07g18520D	LK031787	2355920	2359746	+	-0.684359	2.2364	0	0.776365	1	0.724358	2.2364	0	0.747705	1	0.154127	2.2364	0	0.982524	1
GSBRNA2T00099010001	BnaA07g18540D	LK031787	2367172	2367938	+	0.495396	1.51351	0	0.920468	1	-0.48736	1.51351	0	0.924563	1	0.542557	1.51351	0	0.88578	1
GSBRNA2T00099013001	BnaA07g18560D	LK031787	2378094	2378756	+	0.733948	-0.286674	0	0.742696	1	3.65765	-0.286674	1.95789	0.0400968	1	5.27697	-0.286674	2.95962	0.00673512	0.0446064
GSBRNA2T00099014001	BnaA07g18570D	LK031787	2379519	2382892	+	0.00231394	6.36926	0	1	1	0.175609	6.36926	0	0.99999	1	0.429199	6.36926	0	0.999734	1
GSBRNA2T00099017001	BnaA07g18600D	LK031787	2393059	2396550	+	-0.0621341	7.41732	0	0.999856	1	0.705166	7.41732	0	0.925169	1	-0.168219	7.41732	0	0.999419	1
GSBRNA2T00099018001	BnaA07g18610D	LK031787	2396913	2399426	-	-0.050337	3.76463	0	0.999954	1	-0.00824341	3.76463	0	0.999993	1	-0.2311	3.76463	0	0.999158	1
GSBRNA2T00099019001	BnaA07g18620D	LK031787	2415167	2417949	+	-0.0919033	3.42561	0	0.999726	1	0.159619	3.42561	0	0.999457	1	0.208452	3.42561	0	0.998849	1
GSBRNA2T00099020001	BnaA07g18630D	LK031787	2418745	2420808	+	0.232946	4.77044	0	0.999679	1	0.100796	4.77044	0	0.99994	1	0.553758	4.77044	0	0.989186	1
GSBRNA2T00099021001	BnaA07g18640D	LK031787	2420891	2423493	-	0.0150935	3.82537	0	0.999985	1	0.158027	3.82537	0	0.999803	1	-0.080834	3.82537	0	0.999829	1
GSBRNA2T00099023001	BnaA07g18660D	LK031787	2429596	2431063	+	0.0522189	2.3765	0	0.990785	1	1.38801	2.3765	1.06831	0.153654	1	3.5965	2.3765	7.64697	3.83187e-06	0.000133087
GSBRNA2T00099027001	BnaA07g18700D	LK031787	2456751	2458841	+	0.201132	3.07883	0	0.997731	1	-0.179981	3.07883	0	0.998215	1	0.0830236	3.07883	0	0.998766	1
GSBRNA2T00099028001	BnaA07g18710D	LK031787	2458916	2462022	-	0.178161	1.24816	0	0.985013	1	-0.144843	1.24816	0	0.988667	1	-0.434878	1.24816	0	0.899544	1
GSBRNA2T00099029001	BnaA07g18720D	LK031787	2464929	2465917	-	0.706069	1.57782	0	0.820478	1	-0.574752	1.57782	0	0.909737	1	-2.53553	1.57782	-2.40193	0.0171754	0.100027
GSBRNA2T00099030001	BnaA07g18730D	LK031787	2482645	2484055	+	-0.012537	2.02925	0	0.999707	1	-0.978712	2.02925	0	0.525182	1	-1.20705	2.02925	-0.52901	0.303489	1
GSBRNA2T00099034001	BnaA07g18770D	LK031787	2499636	2501808	+	0.139117	5.44879	0	0.999989	1	0.0210011	5.44879	0	0.999999	1	0.419647	5.44879	0	0.999627	1
GSBRNA2T00099038001	BnaA07g18810D	LK031787	2510083	2511339	-	-0.556604	3.75671	0	0.959889	1	0.762744	3.75671	0	0.842266	1	0.196289	3.75671	0	0.99818	1
GSBRNA2T00099039001	BnaA07g18820D	LK031787	2511778	2513415	-	-0.133435	5.33579	0	0.999974	1	0.129602	5.33579	0	0.999975	1	-0.0749235	5.33579	0	0.999985	1
GSBRNA2T00099040001	BnaA07g18830D	LK031787	2513540	2515591	+	0.209465	4.37743	0	0.999831	1	-0.293624	4.37743	0	0.999562	1	-0.317129	4.37743	0	0.998808	1
GSBRNA2T00099045001	BnaA07g18870D	LK031787	2527483	2529087	+	-0.532497	2.57472	0	0.926414	1	0.235998	2.57472	0	0.985303	1	-0.309289	2.57472	0	0.975331	1
GSBRNA2T00099046001	BnaA07g18880D	LK031787	2529361	2532957	+	0.186607	5.61537	0	0.99997	1	-0.0739822	5.61537	0	0.999993	1	-0.122413	5.61537	0	0.99998	1
GSBRNA2T00099048001	BnaA07g18900D	LK031787	2533488	2535086	-	0.658531	3.72546	0	0.875035	1	0.105963	3.72546	0	0.998427	1	3.26342	3.72546	9.06644	6.98776e-07	3.87948e-05
GSBRNA2T00099049001	BnaA07g18910D	LK031787	2535704	2537566	+	0.0881767	0.0779457	0	0.988217	1	-0.947698	0.0779457	0	0.543461	1	-4.4443	0.0779457	-4.04764	0.000898988	0.00826822
GSBRNA2T00099050001	BnaA07g18920D	LK031787	2538259	2539336	-	-0.242109	6.61638	0	0.999879	1	0.515669	6.61638	0	0.997005	1	0.407111	6.61638	0	0.999202	1
GSBRNA2T00099051001	BnaA07g18930D	LK031787	2542453	2545136	+	0.190741	4.24518	0	0.999945	1	0.0763176	4.24518	0	0.99999	1	0.28325	4.24518	0	0.999776	1
GSBRNA2T00099058001	BnaA07g18980D	LK031787	2637051	2640336	-	0.215742	4.32436	0	0.9996	1	-0.106782	4.32436	0	0.999889	1	0.612061	4.32436	0	0.975404	1
GSBRNA2T00099060001	BnaA07g19000D	LK031787	2643955	2649627	-	0.165658	2.92109	0	0.998071	1	-0.288433	2.92109	0	0.99401	1	0.232865	2.92109	0	0.995029	1
GSBRNA2T00099061001	BnaA07g19010D	LK031787	2653800	2655682	-	-0.417279	1.34407	0	0.936779	1	0.243121	1.34407	0	0.972727	1	-3.68144	1.34407	-3.29107	0.00344935	0.0253575
GSBRNA2T00099063001	BnaA07g19030D	LK031787	2662650	2664345	+	-0.0375485	2.20733	0	0.998879	1	0.15571	2.20733	0	0.995026	1	-0.0592374	2.20733	0	0.997105	1
GSBRNA2T00099064001	BnaA07g19040D	LK031787	2664477	2668010	-	-0.631049	2.59395	0	0.916345	1	0.167851	2.59395	0	0.995975	1	-0.279986	2.59395	0	0.991818	1
GSBRNA2T00099065001	BnaA07g19050D	LK031787	2668396	2670549	-	0.918649	4.64836	0	0.684247	1	0.0270449	4.64836	0	0.999991	1	0.00374593	4.64836	0	0.999994	1
GSBRNA2T00099066001	BnaA07g19060D	LK031787	2671552	2673722	-	0.295336	2.53852	0	0.992529	1	-0.430909	2.53852	0	0.977594	1	0.601064	2.53852	0	0.92793	1
GSBRNA2T00099068001	BnaA07g19080D	LK031787	2677648	2679105	-	-0.402274	4.12088	0	0.961544	1	0.705272	4.12088	0	0.827336	1	0.521855	4.12088	0	0.934809	1
GSBRNA2T00099070001	BnaA07g19100D	LK031787	2684369	2685749	-	0.393933	0.678078	0	0.942098	1	0.219044	0.678078	0	0.985576	1	-4.15192	0.678078	-3.87041	0.00122287	0.0106578
GSBRNA2T00099071001	BnaA07g19110D	LK031787	2694132	2697281	-	0.654276	3.81085	0	0.929846	1	-0.307411	3.81085	0	0.99684	1	0.648328	3.81085	0	0.923026	1
GSBRNA2T00099073001	BnaA07g19130D	LK031787	2711640	2713277	-	0.540408	3.95524	0	0.929778	1	1.13174	3.95524	0.544759	0.298159	1	1.70908	3.95524	2.59068	0.0121592	0.0740464
GSBRNA2T00099076001	BnaA07g19150D	LK031787	2725058	2727876	-	-0.639699	3.98904	0	0.970182	1	-0.0529135	3.98904	0	0.999931	1	-3.48774	3.98904	-7.23265	6.56446e-06	0.000192482
GSBRNA2T00099079001	BnaA07g19180D	LK031787	2732386	2735538	-	-0.0657023	4.8595	0	0.999984	1	0.349881	4.8595	0	0.999584	1	0.263353	4.8595	0	0.999801	1
GSBRNA2T00099080001	BnaA07g19190D	LK031787	2736772	2738525	+	-0.164171	4.53047	0	0.999974	1	0.0637107	4.53047	0	0.999993	1	0.261248	4.53047	0	0.999916	1
GSBRNA2T00099081001	BnaA07g19200D	LK031787	2738803	2740046	+	0.31904	1.0882	0	0.96794	1	-1.22598	1.0882	-0.565688	0.291304	1	-0.539326	1.0882	0	0.84927	1
GSBRNA2T00099082001	BnaA07g19210D	LK031787	2740175	2745136	-	-0.0408642	4.90154	0	0.99996	1	0.711299	4.90154	0	0.944743	1	0.847012	4.90154	0	0.807127	1
GSBRNA2T00099086001	BnaA07g19240D	LK031787	2753620	2757086	-	0.196356	4.75029	0	0.999959	1	-0.240282	4.75029	0	0.99993	1	0.334161	4.75029	0	0.999746	1
GSBRNA2T00099088001	BnaA07g19250D	LK031787	2759187	2759897	+	-0.369988	6.06793	0	0.99974	1	0.372019	6.06793	0	0.999735	1	0.435704	6.06793	0	0.999443	1
GSBRNA2T00099093001	BnaA07g19300D	LK031787	2769542	2772365	+	0.353819	2.56586	0	0.993262	1	-0.124537	2.56586	0	0.999315	1	0.140919	2.56586	0	0.997875	1
GSBRNA2T00099094001	BnaA07g19310D	LK031787	2773107	2774150	+	-0.387249	3.14079	0	0.98434	1	0.957906	3.14079	0	0.569652	1	0.665738	3.14079	0	0.913548	1
GSBRNA2T00099097001	BnaA07g19330D	LK031787	2775125	2775529	-	0.175962	3.27461	0	0.999425	1	-0.203704	3.27461	0	0.999242	1	-0.547129	3.27461	0	0.960282	1
GSBRNA2T00099100001	BnaA07g19350D	LK031787	2792842	2794126	-	-0.329953	2.01566	0	0.978855	1	-0.131478	2.01566	0	0.992876	1	-1.16518	2.01566	-0.417593	0.342047	1
GSBRNA2T00099101001	BnaA07g19360D	LK031787	2797556	2798249	+	-0.256984	0.679903	0	0.957895	1	0.483627	0.679903	0	0.894507	1	-2.37639	0.679903	-2.07234	0.0308591	0.164374
GSBRNA2T00099102001	BnaA07g19370D	LK031787	2800884	2802347	+	-0.051784	4.23369	0	0.999931	1	0.0461843	4.23369	0	0.999939	1	-0.708263	4.23369	0	0.904213	1
GSBRNA2T00099109001	BnaA07g19430D	LK031787	2817655	2819695	-	0.143086	2.78033	0	0.995798	1	-0.094848	2.78033	0	0.997504	1	0.164958	2.78033	0	0.992579	1
GSBRNA2T00099110001	BnaA07g19440D	LK031787	2819978	2821055	-	-0.588863	2.80817	0	0.921343	1	0.36419	2.80817	0	0.97886	1	0.537023	2.80817	0	0.957858	1
GSBRNA2T00099113001	BnaA07g19460D	LK031787	2825578	2828728	-	-0.35969	5.44781	0	0.997593	1	0.515202	5.44781	0	0.989141	1	-0.0337106	5.44781	0	0.999945	1
GSBRNA2T00099116001	BnaA07g19480D	LK031787	2831545	2837082	-	0.480229	4.28998	0	0.99597	1	-0.262061	4.28998	0	0.999688	1	-0.0420247	4.28998	0	0.999944	1
GSBRNA2T00099120001	BnaA07g19520D	LK031787	2858608	2862011	-	-0.161191	3.37775	0	0.999297	1	0.0559556	3.37775	0	0.999798	1	-1.20398	3.37775	-0.758602	0.231673	0.888462
GSBRNA2T00099122001	BnaA07g19540D	LK031787	2874203	2881210	+	0.198423	4.90665	0	0.999899	1	-0.153334	4.90665	0	0.999941	1	-0.123769	4.90665	0	0.999926	1
GSBRNA2T00099123001	BnaA07g19550D	LK031787	2881450	2882924	+	-0.0697376	2.71116	0	0.999528	1	0.378457	2.71116	0	0.993152	1	0.487913	2.71116	0	0.979741	1
GSBRNA2T00099126001	BnaA07g19580D	LK031787	2887396	2888946	-	-0.28643	4.50889	0	0.999908	1	0.00416082	4.50889	0	1	1	-0.57773	4.50889	0	0.993299	1
GSBRNA2T00099127001	BnaA07g19590D	LK031787	2889158	2895635	-	-0.226622	6.51329	0	0.999989	1	0.0388052	6.51329	0	0.999999	1	-0.334835	6.51329	0	0.999947	1
GSBRNA2T00099129001	BnaA07g19610D	LK031787	2909143	2914466	-	0.44405	7.50845	0	0.999256	1	0.0966363	7.50845	0	0.99999	1	1.99049	7.50845	7.51344	4.53621e-06	0.00014846
GSBRNA2T00099130001	BnaA07g19620D	LK031787	2915998	2917288	+	1.05757	1.08664	0.179354	0.43041	1	-0.17689	1.08664	0	0.995424	1	-2.74697	1.08664	-2.57056	0.0126882	0.0768131
GSBRNA2T00099133001	BnaA07g19650D	LK031787	2920938	2922147	-	0.565203	2.17362	0	0.881279	1	0.442484	2.17362	0	0.959447	1	1.29705	2.17362	0.874486	0.199879	0.788538
GSBRNA2T00099136001	BnaA07g19680D	LK031787	2926291	2936223	-	0.657805	6.27747	0	0.99217	1	-0.0098851	6.27747	0	1	1	-0.423586	6.27747	0	0.999608	1
GSBRNA2T00099139001	BnaA07g19710D	LK031787	2955331	2956913	+	0.0350921	4.41549	0	0.999992	1	0.0181467	4.41549	0	0.999996	1	-0.0471538	4.41549	0	0.999981	1
GSBRNA2T00099140001	BnaA07g19720D	LK031787	2957036	2959183	-	1.18151	1.90714	0.548983	0.296769	1	-0.0504502	1.90714	0	0.999106	1	1.08949	1.90714	0.252725	0.402512	1
GSBRNA2T00099141001	BnaA07g19730D	LK031787	2959446	2963349	+	0.0666551	5.92836	0	0.999998	1	0.0166803	5.92836	0	0.999999	1	0.1237	5.92836	0	0.999994	1
GSBRNA2T00099144001	BnaA07g19750D	LK031787	2965933	2971283	+	0.516031	2.66441	0	0.973403	1	-0.144901	2.66441	0	0.999199	1	-1.29165	2.66441	-0.832544	0.211037	0.824198
GSBRNA2T00099145001	BnaA07g19760D	LK031787	2972240	2974089	+	0.0367622	5.04457	0	0.999998	1	0.0974661	5.04457	0	0.999994	1	-0.116687	5.04457	0	0.999986	1
GSBRNA2T00099146001	BnaA07g19770D	LK031787	2974324	2981910	+	0.514053	5.19635	0	0.995572	1	0.311112	5.19635	0	0.999683	1	-0.554508	5.19635	0	0.987032	1
GSBRNA2T00099147001	BnaA07g19780D	LK031787	2982353	2986669	+	1.00996	3.71228	0.057425	0.477596	1	-0.148322	3.71228	0	0.999931	1	0.0179478	3.71228	0	0.999933	1
GSBRNA2T00099152001	BnaA07g19810D	LK031787	3004817	3006595	-	0.820919	4.20502	0	0.85637	1	-0.218833	4.20502	0	0.999881	1	0.462717	4.20502	0	0.995119	1
GSBRNA2T00099153001	BnaA07g19820D	LK031787	3006879	3008558	-	0.0656113	1.90804	0	0.998902	1	-0.212705	1.90804	0	0.994529	1	-2.04986	1.90804	-2.32232	0.0197371	0.112673
GSBRNA2T00099156001	BnaA07g19850D	LK031787	3036310	3038932	+	-0.218098	2.25644	0	0.992682	1	0.325733	2.25644	0	0.98575	1	0.537651	2.25644	0	0.946113	1
GSBRNA2T00099157001	BnaA07g19860D	LK031787	3039007	3045879	-	0.275581	5.62657	0	0.999959	1	-0.00500478	5.62657	0	1	1	-0.674993	5.62657	0	0.98445	1
GSBRNA2T00099159001	BnaA07g19880D	LK031787	3050996	3053463	-	0.170291	3.0606	0	0.990846	1	0.0424702	3.0606	0	0.998311	1	2.03337	3.0606	3.81387	0.00132653	0.0113731
GSBRNA2T00099161001	BnaA07g19900D	LK031787	3056093	3062077	-	-0.378433	6.6942	0	0.999772	1	-0.0444978	6.6942	0	0.999997	1	0.120799	6.6942	0	0.99999	1
GSBRNA2T00099162001	BnaA07g19910D	LK031787	3074751	3076160	+	-0.0324245	1.54859	0	0.998037	1	-0.165857	1.54859	0	0.986886	1	1.04144	1.54859	0.137374	0.446567	1
GSBRNA2T00099163001	BnaA07g19920D	LK031787	3078071	3078739	+	-1.1023	1.87981	-0.259583	0.399988	1	0.572817	1.87981	0	0.837963	1	-0.222561	1.87981	0	0.975875	1
GSBRNA2T00099164001	BnaA07g19930D	LK031787	3079041	3081362	-	0.336422	5.45124	0	0.999936	1	-0.270553	5.45124	0	0.999973	1	-0.500405	5.45124	0	0.998921	1
GSBRNA2T00099166001	BnaA07g19940D	LK031787	3084614	3088211	-	-0.609145	2.96987	0	0.980732	1	-0.351507	2.96987	0	0.997481	1	-2.62924	2.96987	-5.41473	9.04603e-05	0.00131322
GSBRNA2T00099171001	BnaA07g19990D	LK031787	3109033	3113371	+	-0.17778	4.94633	0	0.999967	1	-0.140141	4.94633	0	0.999975	1	-0.255495	4.94633	0	0.999881	1
GSBRNA2T00099175001	BnaA07g20030D	LK031787	3124671	3125351	-	-0.0768907	2.0814	0	0.998917	1	-0.218503	2.0814	0	0.994503	1	-1.24612	2.0814	-0.688876	0.2523	0.950754
GSBRNA2T00099177001	BnaA07g20050D	LK031787	3130194	3131777	+	-0.368981	4.59807	0	0.999655	1	0.434797	4.59807	0	0.999245	1	0.352129	4.59807	0	0.999761	1
GSBRNA2T00099178001	BnaA07g20060D	LK031787	3131956	3134649	+	-0.287295	1.89765	0	0.982672	1	-0.241616	1.89765	0	0.981207	1	0.633389	1.89765	0	0.892287	1
GSBRNA2T00099179001	BnaA07g20070D	LK031787	3138332	3141380	+	-0.748882	3.76747	0	0.890948	1	0.417137	3.76747	0	0.993515	1	-0.90518	3.76747	0	0.665452	1
GSBRNA2T00099182001	BnaA07g20100D	LK031787	3147130	3150826	-	-0.535806	2.30384	0	0.865598	1	-2.09864	2.30384	-1.60294	0.068397	1	-2.07879	2.30384	-1.6896	0.0592252	0.286404
GSBRNA2T00099183001	BnaA07g20110D	LK031787	3157729	3159219	+	0.0702873	0.465016	0	0.969274	1	2.551	0.465016	2.5438	0.0132852	1	3.46618	0.465016	4.03959	0.00089664	0.00825177
GSBRNA2T00099184001	BnaA07g20120D	LK031787	3159416	3161011	-	0.30368	1.38103	0	0.943942	1	0.266246	1.38103	0	0.964567	1	-0.789254	1.38103	0	0.647457	1
GSBRNA2T00099185001	BnaA07g20130D	LK031787	3164192	3165208	+	-1.81262	1.11964	-1.60065	0.0683369	1	0.147727	1.11964	0	0.947771	1	0.522142	1.11964	0	0.903798	1
GSBRNA2T00099186001	BnaA07g20140D	LK031787	3165341	3168172	+	-0.0865406	3.38327	0	0.999422	1	-0.114249	3.38327	0	0.999052	1	0.238804	3.38327	0	0.996973	1
GSBRNA2T00099187001	BnaA07g20150D	LK031787	3168261	3169061	-	-0.861983	2.36919	0	0.626266	1	1.66962	2.36919	1.72381	0.0557435	1	1.06393	2.36919	0.194806	0.424495	1
GSBRNA2T00099190001	BnaA07g20180D	LK031787	3174344	3175740	+	-0.0957903	2.65201	0	0.998674	1	0.22226	2.65201	0	0.99614	1	0.432623	2.65201	0	0.979467	1
GSBRNA2T00099191001	BnaA07g20190D	LK031787	3176096	3178392	-	0.0268133	2.47354	0	0.998952	1	0.604019	2.47354	0	0.912023	1	0.412008	2.47354	0	0.959643	1
GSBRNA2T00099193001	BnaA07g20200D	LK031787	3180990	3182928	+	-0.933768	6.14314	0	0.647995	1	1.10665	6.14314	0.629689	0.270598	1	-0.789552	6.14314	0	0.875829	1
GSBRNA2T00099194001	BnaA07g20210D	LK031787	3183760	3188291	-	3.97725	3.76694	9.69384	3.52394e-07	7.28633e-05	0.326622	3.76694	0	0.99964	1	1.5603	3.76694	1.59773	0.0685935	0.324612
GSBRNA2T00099198001	BnaA07g20230D	LK031787	3194466	3197258	+	0.0937426	3.21538	0	0.999504	1	-0.210538	3.21538	0	0.998237	1	-0.0794822	3.21538	0	0.999183	1
GSBRNA2T00099201001	BnaA07g20250D	LK031787	3204172	3208135	+	-0.0187743	3.84437	0	0.999983	1	-0.258431	3.84437	0	0.999286	1	0.109868	3.84437	0	0.99983	1
GSBRNA2T00099202001	BnaA07g20260D	LK031787	3208205	3211305	+	0.598367	3.19431	0	0.970639	1	-0.264292	3.19431	0	0.999166	1	0.24802	3.19431	0	0.997757	1
GSBRNA2T00099203001	BnaA07g20270D	LK031787	3216474	3221133	+	-0.437546	1.25969	0	0.89961	1	0.171885	1.25969	0	0.968406	1	0.0267831	1.25969	0	0.995836	1
GSBRNA2T00099204001	BnaA07g20280D	LK031787	3221278	3226497	-	-0.253825	2.92268	0	0.997385	1	0.129395	2.92268	0	0.999087	1	0.0549637	2.92268	0	0.999615	1
GSBRNA2T00099205001	BnaA07g20290D	LK031787	3226976	3228923	+	-1.74989	3.20985	-2.94327	0.00639742	0.178821	-0.117816	3.20985	0	0.994069	1	0.75189	3.20985	0	0.898267	1
GSBRNA2T00099206001	BnaA07g20300D	LK031787	3230416	3233287	+	-0.304486	5.06993	0	0.997841	1	0.197316	5.06993	0	0.999179	1	0.586411	5.06993	0	0.973448	1
GSBRNA2T00099208001	BnaA07g20320D	LK031787	3237545	3240626	-	-1.90206	2.84406	-4.10286	0.000797504	0.0313811	-0.00139177	2.84406	0	0.999971	1	-0.60364	2.84406	0	0.972316	1
GSBRNA2T00099209001	BnaA07g20330D	LK031787	3241350	3243812	-	0.0310162	3.50567	0	0.999671	1	-0.345804	3.50567	0	0.988144	1	0.184565	3.50567	0	0.996495	1
GSBRNA2T00099211001	BnaA07g20350D	LK031787	3254649	3256355	+	0.608863	1.47149	0	0.857642	1	-1.02055	1.47149	-0.054255	0.478934	1	-0.262818	1.47149	0	0.946888	1
GSBRNA2T00099214001	BnaA07g20370D	LK031787	3263288	3265584	-	0.125499	2.41204	0	0.993791	1	0.137444	2.41204	0	0.994617	1	1.74724	2.41204	2.74439	0.0091945	0.0582446
GSBRNA2T00099216001	BnaA07g20390D	LK031787	3268723	3281372	+	-0.077583	5.86727	0	0.999996	1	-0.147811	5.86727	0	0.99999	1	-0.0382386	5.86727	0	0.999998	1
GSBRNA2T00099217001	BnaA07g20400D	LK031787	3281521	3284424	-	0.165049	3.81252	0	0.999779	1	-1.03092	3.81252	-0.158536	0.438391	1	-0.146709	3.81252	0	0.999609	1
GSBRNA2T00099219001	BnaA07g20420D	LK031787	3287518	3290534	-	0.124646	4.86465	0	0.999979	1	-0.0177158	4.86465	0	0.999998	1	0.633806	4.86465	0	0.988881	1
GSBRNA2T00099220001	BnaA07g20430D	LK031787	3290750	3293044	+	-0.586448	4.33423	0	0.973037	1	0.297472	4.33423	0	0.997959	1	0.116704	4.33423	0	0.999751	1
GSBRNA2T00099227001	BnaA07g20490D	LK031787	3308215	3311481	+	0.519746	3.98144	0	0.989111	1	-0.0735371	3.98144	0	0.999932	1	-0.173818	3.98144	0	0.999019	1
GSBRNA2T00099228001	BnaA07g20500D	LK031787	3312521	3315144	+	-0.201408	2.50357	0	0.984071	1	0.114739	2.50357	0	0.99168	1	-0.10159	2.50357	0	0.990546	1
GSBRNA2T00099229001	BnaA07g20510D	LK031787	3315199	3316057	-	-2.72105	1.37307	-1.6477	0.0652884	1	0.00506946	1.37307	0	0.997838	1	-0.263319	1.37307	0	0.896313	1
GSBRNA2T00099231001	BnaA07g20520D	LK031787	3318177	3320644	+	-0.351656	1.9525	0	0.970188	1	-0.00811629	1.9525	0	0.999507	1	-0.801719	1.9525	0	0.692891	1
GSBRNA2T00099232001	BnaA07g20530D	LK031787	3345223	3346896	-	-0.323588	3.8946	0	0.999829	1	-0.0222795	3.8946	0	0.999997	1	-4.45585	3.8946	-9.51819	4.27164e-07	2.84077e-05
GSBRNA2T00099235001	BnaA07g20560D	LK031787	3355977	3357546	+	0.42625	6.24991	0	0.99867	1	-0.0657262	6.24991	0	0.999983	1	1.64637	6.24991	4.36565	0.00050631	0.00517037
GSBRNA2T00099236001	BnaA07g20570D	LK031787	3365661	3366921	+	0.127958	5.11361	0	0.999084	1	0.555725	5.11361	0	0.968245	1	-2.54816	5.11361	-4.66038	0.00030748	0.0034383
GSBRNA2T00099241001	BnaA07g20620D	LK031787	3373344	3375242	-	-0.234636	6.48144	0	0.999969	1	0.162107	6.48144	0	0.999987	1	0.345864	6.48144	0	0.99988	1
GSBRNA2T00099242001	BnaA07g20630D	LK031787	3377176	3380271	+	0.40606	1.86308	0	0.968749	1	0.00155006	1.86308	0	0.999968	1	-0.0810338	1.86308	0	0.99398	1
GSBRNA2T00099244001	BnaA07g20650D	LK031787	3404498	3408073	+	0.204202	4.7173	0	0.999961	1	-0.141488	4.7173	0	0.999982	1	-0.212534	4.7173	0	0.999913	1
GSBRNA2T00099250001	BnaA07g20700D	LK031787	3435100	3437693	+	0.400191	1.91579	0	0.986739	1	-0.212025	1.91579	0	0.99749	1	-7.4984	1.91579	-6.67812	1.49428e-05	0.000333597
GSBRNA2T00099252001	BnaA07g20720D	LK031787	3444191	3445461	-	0.291808	4.67514	0	0.998917	1	-0.13392	4.67514	0	0.999801	1	-0.0232902	4.67514	0	0.999948	1
GSBRNA2T00099254001	BnaA07g20730D	LK031787	3462295	3463162	-	0.217304	4.69666	0	0.999716	1	-0.493511	4.69666	0	0.994112	1	-1.74324	4.69666	-3.33261	0.0031487	0.0234828
GSBRNA2T00099256001	BnaA07g20740D	LK031787	3465282	3466267	+	0.316927	4.4424	0	0.998831	1	-0.188247	4.4424	0	0.999721	1	1.177	4.4424	1.0314	0.161769	0.664004
GSBRNA2T00099258001	BnaA07g20750D	LK031787	3471389	3472738	+	-0.369156	4.14132	0	0.996871	1	0.20254	4.14132	0	0.999295	1	0.382863	4.14132	0	0.997009	1
GSBRNA2T00099259001	BnaA07g20760D	LK031787	3472788	3474228	-	0.345641	2.87238	0	0.991758	1	0.0351662	2.87238	0	0.999802	1	0.413203	2.87238	0	0.981573	1
GSBRNA2T00099260001	BnaA07g20770D	LK031787	3474470	3476659	-	0.948059	3.87083	0	0.628785	1	-0.620452	3.87083	0	0.98746	1	-0.775126	3.87083	0	0.85178	1
GSBRNA2T00099261001	BnaA07g20780D	LK031787	3484731	3484976	-	0.160475	4.30415	0	0.999004	1	0.466616	4.30415	0	0.987509	1	-3.58662	4.30415	-5.39362	9.38756e-05	0.00134995
GSBRNA2T00099262001	BnaA07g20790D	LK031787	3492608	3494698	-	0.599289	3.23582	0	0.970189	1	-0.125195	3.23582	0	0.999816	1	-0.333676	3.23582	0	0.991913	1
GSBRNA2T00099263001	BnaA07g20800D	LK031787	3495513	3497444	-	0.459173	4.84725	0	0.998234	1	0.130988	4.84725	0	0.999971	1	0.1523	4.84725	0	0.999911	1
GSBRNA2T00099268001	BnaA07g20830D	LK031787	3507555	3509224	+	0.0868941	1.32175	0	0.987841	1	0.620568	1.32175	0	0.841526	1	-1.07263	1.32175	-0.130831	0.450615	1
GSBRNA2T00099269001	BnaA07g20840D	LK031787	3521161	3524955	+	0.456997	4.82383	0	0.96289	1	0.00733721	4.82383	0	0.999862	1	1.67177	4.82383	2.51546	0.0139341	0.0833633
GSBRNA2T00099270001	BnaA07g20850D	LK031787	3533416	3537097	-	0.0685362	3.20689	0	0.99992	1	-0.00593979	3.20689	0	0.999994	1	-1.96181	3.20689	-3.24791	0.00367232	0.0267346
GSBRNA2T00099271001	BnaA07g20860D	LK031787	3537479	3538628	-	-0.0425068	4.43826	0	0.999935	1	0.468248	4.43826	0	0.994294	1	0.781456	4.43826	0	0.877246	1
GSBRNA2T00099272001	BnaA07g20870D	LK031787	3539187	3540375	-	0.125586	1.83125	0	0.997972	1	-0.731779	1.83125	0	0.820935	1	-2.32015	1.83125	-2.7644	0.00887464	0.0565421
GSBRNA2T00099273001	BnaA07g20880D	LK031787	3542686	3545426	+	-0.603707	1.22027	0	0.873792	1	0.0190708	1.22027	0	0.99842	1	-3.97538	1.22027	-3.83627	0.00129494	0.0111672
GSBRNA2T00099280001	BnaA07g20920D	LK031787	3578833	3582209	+	0.423933	4.20547	0	0.996717	1	0.136303	4.20547	0	0.999891	1	-0.484033	4.20547	0	0.98552	1
GSBRNA2T00099281001	BnaA07g20930D	LK031787	3583828	3584508	+	-0.762494	3.78174	0	0.903708	1	0.106873	3.78174	0	0.999814	1	0.458793	3.78174	0	0.997546	1
GSBRNA2T00099284001	BnaA07g20960D	LK031787	3593192	3595501	-	1.1048	1.89373	0.404628	0.346587	1	-0.408355	1.89373	0	0.98662	1	-7.06505	1.89373	-5.90508	4.55606e-05	0.000768573
GSBRNA2T00099286001	BnaA07g20970D	LK031787	3613080	3615273	+	-0.31515	2.47948	0	0.993103	1	-0.170443	2.47948	0	0.99687	1	-0.643147	2.47948	0	0.88761	1
GSBRNA2T00099287001	BnaA07g20980D	LK031787	3615374	3623335	-	-0.793197	3.45915	0	0.852192	1	-0.275768	3.45915	0	0.997027	1	0.406751	3.45915	0	0.99754	1
GSBRNA2T00099294001	BnaA07g21010D	LK031787	3652392	3656580	-	-0.592938	5.36119	0	0.973107	1	-0.356295	5.36119	0	0.996331	1	-0.414545	5.36119	0	0.994543	1
GSBRNA2T00099297001	BnaA07g21040D	LK031787	3658955	3661093	+	1.12781	0.854743	0.302608	0.383959	1	-0.354108	0.854743	0	0.951019	1	-0.202569	0.854743	0	0.93869	1
GSBRNA2T00099300001	BnaA07g21060D	LK031787	3665918	3670033	+	0.0441669	4.05507	0	0.999983	1	0.0371606	4.05507	0	0.999987	1	-0.106157	4.05507	0	0.999908	1
GSBRNA2T00099302001	BnaA07g21080D	LK031787	3675212	3679445	-	0.893039	5.26384	0	0.774966	1	-1.01009	5.26384	-0.0734598	0.471351	1	-2.54922	5.26384	-7.61517	3.98084e-06	0.000136313
GSBRNA2T00099306001	BnaA07g21100D	LK031787	3691243	3692662	+	0.368856	1.98927	0	0.968261	1	-0.187785	1.98927	0	0.991703	1	1.41832	1.98927	1.44822	0.0871228	0.397137
GSBRNA2T00099309001	BnaA07g21130D	LK031787	3701301	3702145	+	0.759326	-0.798734	0	0.664282	1	0.386949	-0.798734	0	0.826891	1	12.1888	-0.798734	12.8909	1.99413e-08	4.3312e-06
GSBRNA2T00099310001	BnaA07g21140D	LK031787	3705552	3706191	-	-0.0661331	2.47539	0	0.989369	1	-0.191861	2.47539	0	0.961687	1	4.86909	2.47539	12.1152	3.37276e-08	6.06534e-06
GSBRNA2T00099312001	BnaA07g21150D	LK031787	3718651	3718959	+	-0.328914	0.476092	0	0.929658	1	-0.632301	0.476092	0	0.761565	1	-3.26345	0.476092	-2.66184	0.0108562	0.067109
GSBRNA2T00099313001	BnaA07g21160D	LK031787	3721895	3726473	-	0.0305112	4.20787	0	0.999991	1	-0.114808	4.20787	0	0.999956	1	-1.14447	4.20787	-0.75389	0.233029	0.892503
GSBRNA2T00099314001	BnaA07g21170D	LK031787	3735410	3736425	+	-0.818407	5.30673	0	0.844089	1	0.332944	5.30673	0	0.998659	1	-0.0154864	5.30673	0	0.999989	1
GSBRNA2T00099315001	BnaA07g21180D	LK031787	3738308	3739414	-	-0.426469	4.51009	0	0.991861	1	0.259942	4.51009	0	0.998033	1	-0.0934127	4.51009	0	0.999604	1
GSBRNA2T00099318001	BnaA07g21200D	LK031787	3751362	3754255	-	-0.42811	5.21531	0	0.9983	1	-0.165314	5.21531	0	0.999879	1	0.0367759	5.21531	0	0.999986	1
GSBRNA2T00099320001	BnaA07g21220D	LK031787	3769438	3770923	-	0.299627	2.03859	0	0.941782	1	1.19447	2.03859	0.571276	0.289418	1	2.38024	2.03859	3.81527	0.00132366	0.0113572
GSBRNA2T00099321001	BnaA07g21230D	LK031787	3772198	3773434	+	-0.279375	1.21291	0	0.935321	1	0.789981	1.21291	0	0.684106	1	0.568243	1.21291	0	0.829772	1
GSBRNA2T00099322001	BnaA07g21240D	LK031787	3773515	3780719	-	-0.389625	5.38846	0	0.999746	1	0.229203	5.38846	0	0.999963	1	-0.358007	5.38846	0	0.999786	1
GSBRNA2T00099328001	BnaA07g21290D	LK031787	3797945	3799535	+	-0.215354	3.50741	0	0.999472	1	-0.0599693	3.50741	0	0.999892	1	0.137504	3.50741	0	0.999718	1
GSBRNA2T00099333001	BnaA07g21330D	LK031787	3828170	3829040	-	1.36159	-0.317029	0.353823	0.385067	1	0.989186	-0.317029	0	0.519771	1	5.90788	-0.317029	5.9099	4.39714e-05	0.000750057
GSBRNA2T00099338001	BnaA07g21360D	LK031787	3855278	3856542	+	0.0254766	2.98081	0	0.999521	1	-0.161939	2.98081	0	0.995791	1	0.215827	2.98081	0	0.992572	1
GSBRNA2T00099340001	BnaA07g21380D	LK031787	3867787	3868344	-	-0.13946	1.65519	0	0.972752	1	0.159158	1.65519	0	0.968377	1	0.771478	1.65519	0	0.700587	1
GSBRNA2T00099344001	BnaA07g21420D	LK031787	3884943	3888418	+	-0.105816	1.9618	0	0.98787	1	-0.120265	1.9618	0	0.983884	1	1.75327	1.9618	2.35878	0.0184786	0.106588
GSBRNA2T00099346001	BnaA07g21440D	LK031787	3892579	3893573	+	0.0683532	2.29437	0	0.998548	1	1.43547	2.29437	1.9223	0.0398306	1	-2.33182	2.29437	-2.65789	0.0107762	0.0666794
GSBRNA2T00099347001	BnaA07g21450D	LK031787	3896432	3898781	+	0.229312	1.49988	0	0.980384	1	0.0686892	1.49988	0	0.99632	1	-0.117717	1.49988	0	0.984782	1
GSBRNA2T00099349001	BnaA07g21470D	LK031787	3903775	3904935	-	-2.5146	1.08921	-2.45965	0.015469	0.36738	0.197118	1.08921	0	0.914139	1	0.0839676	1.08921	0	0.990241	1
GSBRNA2T00099351001	BnaA07g21490D	LK031787	3908317	3909335	+	0.15246	5.93357	0	0.999971	1	0.0102014	5.93357	0	0.999999	1	0.395264	5.93357	0	0.99947	1
GSBRNA2T00099352001	BnaA07g21500D	LK031787	3922288	3925164	+	-0.426557	5.1076	0	0.997785	1	-0.277798	5.1076	0	0.999411	1	-0.271917	5.1076	0	0.999505	1
GSBRNA2T00099353001	BnaA07g21510D	LK031787	3925855	3927153	+	0.152784	1.84972	0	0.979457	1	0.340864	1.84972	0	0.952941	1	0.410269	1.84972	0	0.913501	1
GSBRNA2T00099354001	BnaA07g21520D	LK031787	3928394	3929669	-	-0.0346327	8.16641	0	0.999993	1	-0.210676	8.16641	0	0.999913	1	0.19993	8.16641	0	0.999923	1
GSBRNA2T00099358001	BnaA07g21550D	LK031787	3948486	3951810	-	-0.188205	5.98733	0	0.999984	1	0.239242	5.98733	0	0.999971	1	0.183095	5.98733	0	0.999984	1
GSBRNA2T00099359001	BnaA07g21560D	LK031787	3954408	3956186	-	-0.647484	3.35716	0	0.968187	1	0.457532	3.35716	0	0.995224	1	-1.10122	3.35716	-0.490874	0.316371	1
GSBRNA2T00099363001	BnaA07g21590D	LK031787	3962687	3964248	+	0.0115802	4.27797	0	0.999998	1	-0.122023	4.27797	0	0.999973	1	-0.0577237	4.27797	0	0.999983	1
GSBRNA2T00099365001	BnaA07g21610D	LK031787	3971650	3972586	-	-0.288306	4.34024	0	0.999734	1	-0.104308	4.34024	0	0.999954	1	0.211307	4.34024	0	0.999886	1
GSBRNA2T00099369001	BnaA07g21640D	LK031787	3986347	3990812	-	-0.803968	4.52103	0	0.825571	1	-0.541269	4.52103	0	0.969879	1	-1.8016	4.52103	-3.27379	0.00350345	0.0256912
GSBRNA2T00099372001	BnaA07g21660D	LK031787	4016350	4018000	+	0.206852	2.8574	0	0.998292	1	-0.165314	2.8574	0	0.998888	1	0.547312	2.8574	0	0.967219	1
GSBRNA2T00099374001	BnaA07g21670D	LK031787	4028640	4031312	+	0.126563	6.48289	0	0.999973	1	-0.438918	6.48289	0	0.998915	1	-3.34159	6.48289	-12.7247	1.96972e-08	4.3312e-06
GSBRNA2T00099377001	BnaA07g21690D	LK031787	4041100	4043428	+	0.534828	3.0115	0	0.968921	1	-0.316448	3.0115	0	0.995667	1	1.06929	3.0115	0.308911	0.381455	1
GSBRNA2T00099379001	BnaA07g21710D	LK031787	4050039	4050578	-	-1.65817	5.34804	-4.81245	0.00023865	0.0111862	-0.670831	5.34804	0	0.97165	1	-0.233017	5.34804	0	0.999958	1
GSBRNA2T00099382001	BnaA07g21730D	LK031787	4069876	4073536	+	0.00522096	4.6884	0	0.999992	1	-0.0692158	4.6884	0	0.999877	1	-0.0986377	4.6884	0	0.999727	1
GSBRNA2T00099384001	BnaA07g21750D	LK031787	4074446	4076383	+	-0.46802	5.04427	0	0.99758	1	0.425334	5.04427	0	0.998519	1	0.538535	5.04427	0	0.995362	1
GSBRNA2T00099389001	BnaA07g21780D	LK031787	4097681	4099712	-	-0.0906278	3.11456	0	0.999676	1	0.153992	3.11456	0	0.999391	1	0.530914	3.11456	0	0.980989	1
GSBRNA2T00099391001	BnaA07g21790D	LK031787	4104525	4107915	+	-0.459333	2.0426	0	0.946182	1	0.806313	2.0426	0	0.737105	1	1.07884	2.0426	0.301272	0.384293	1
GSBRNA2T00099392001	BnaA07g21800D	LK031787	4108388	4113159	-	0.834126	2.9042	0	0.797583	1	-0.87646	2.9042	0	0.733152	1	-1.0957	2.9042	-0.330975	0.373312	1
GSBRNA2T00099394001	BnaA07g21820D	LK031787	4125145	4127829	+	-0.186872	3.97759	0	0.999618	1	-0.0543345	3.97759	0	0.999912	1	-0.108888	3.97759	0	0.99975	1
GSBRNA2T00099395001	BnaA07g21830D	LK031787	4130668	4133361	+	-0.0619649	4.1599	0	0.999718	1	0.480755	4.1599	0	0.987149	1	0.907991	4.1599	0	0.671499	1
GSBRNA2T00099396001	BnaA07g21840D	LK031787	4133681	4133947	-	0.170097	2.13831	0	0.987719	1	0.15057	2.13831	0	0.991935	1	0.362217	2.13831	0	0.953849	1
GSBRNA2T00099397001	BnaA07g21850D	LK031787	4134757	4142624	-	-0.403331	3.41368	0	0.996218	1	0.298508	3.41368	0	0.998542	1	0.0202205	3.41368	0	0.999966	1
GSBRNA2T00099399001	BnaA07g21870D	LK031787	4148920	4150752	+	-0.0575919	3.85041	0	0.999979	1	-0.234921	3.85041	0	0.999752	1	-0.320119	3.85041	0	0.998974	1
GSBRNA2T00099400001	BnaA07g21880D	LK031787	4151616	4153010	+	-0.317586	2.59818	0	0.988716	1	-0.388549	2.59818	0	0.971771	1	0.0953389	2.59818	0	0.998091	1
GSBRNA2T00099403001	BnaA07g21900D	LK031787	4154877	4156973	-	-0.0494838	2.94932	0	0.999912	1	-0.196824	2.94932	0	0.999284	1	0.0425559	2.94932	0	0.999876	1
GSBRNA2T00099405001	BnaA07g21910D	LK031787	4160964	4161868	-	0.217538	0.698323	0	0.899362	1	1.28172	0.698323	0.308004	0.396259	1	10.5944	0.698323	12.4637	2.77373e-08	5.35948e-06
GSBRNA2T00099406001	BnaA07g21920D	LK031787	4162966	4164194	-	0.536033	0.879464	0	0.84731	1	1.02313	0.879464	0.0671623	0.473847	1	0.135457	0.879464	0	0.966909	1
GSBRNA2T00099407001	BnaA07g21930D	LK031787	4167554	4168843	+	-0.396555	2.21166	0	0.943686	1	0.463002	2.21166	0	0.924243	1	0.809269	2.21166	0	0.722413	1
GSBRNA2T00099408001	BnaA07g21940D	LK031787	4172435	4176162	+	0.449757	1.51205	0	0.938595	1	0.0992318	1.51205	0	0.996032	1	-0.0921518	1.51205	0	0.987993	1
GSBRNA2T00099410001	BnaA07g21960D	LK031787	4178098	4178916	+	0.704403	1.73686	0	0.809503	1	0.298536	1.73686	0	0.98848	1	1.39948	1.73686	1.25895	0.116496	0.50606
GSBRNA2T00099411001	BnaA07g21970D	LK031787	4180962	4182073	-	0.448599	4.20613	0	0.997033	1	0.202942	4.20613	0	0.999877	1	0.170353	4.20613	0	0.999706	1
GSBRNA2T00099413001	BnaA07g21990D	LK031787	4186427	4189831	+	-0.064385	4.72407	0	0.999935	1	0.229449	4.72407	0	0.999594	1	0.868213	4.72407	0	0.774574	1
GSBRNA2T00099414001	BnaA07g22000D	LK031787	4190025	4193103	+	-0.526724	4.47117	0	0.995981	1	0.862311	4.47117	0	0.81918	1	-0.27213	4.47117	0	0.999744	1
GSBRNA2T00099418001	BnaA07g22040D	LK031787	4200456	4202952	+	-0.0587104	3.79119	0	0.999974	1	-0.292174	3.79119	0	0.999435	1	-0.452892	3.79119	0	0.994738	1
GSBRNA2T00099419001	BnaA07g22050D	LK031787	4203963	4206138	-	0.485464	3.19738	0	0.978191	1	-0.146525	3.19738	0	0.999086	1	0.426983	3.19738	0	0.980935	1
GSBRNA2T00099421001	BnaA07g22060D	LK031787	4209306	4210871	-	-2.19627	1.27777	-3.43252	0.00262828	0.0850741	0.652938	1.27777	0	0.796686	1	-1.51128	1.27777	-1.52848	0.0767029	0.357034
GSBRNA2T00099422001	BnaA07g22070D	LK031787	4210936	4212721	-	-1.01086	0.790293	-0.0252388	0.49045	1	-0.176566	0.790293	0	0.9543	1	-1.18658	0.790293	-0.378526	0.356414	1
GSBRNA2T00099423001	BnaA07g22080D	LK031787	4214131	4217268	-	-0.57062	3.56073	0	0.991693	1	-0.454395	3.56073	0	0.995646	1	-0.923239	3.56073	0	0.663633	1
GSBRNA2T00099424001	BnaA07g22090D	LK031787	4221553	4225209	-	0.176477	4.87278	0	0.999804	1	-0.0739831	4.87278	0	0.999949	1	2.56866	4.87278	10.1584	2.15814e-07	1.94885e-05
GSBRNA2T00099426001	BnaA07g22100D	LK031787	4234709	4238393	-	-0.458818	4.31544	0	0.99741	1	0.100632	4.31544	0	0.999939	1	-0.224877	4.31544	0	0.999747	1
GSBRNA2T00099436001	BnaA07g22170D	LK031787	4289174	4291085	-	-0.198566	4.56373	0	0.999575	1	0.182363	4.56373	0	0.999641	1	0.276094	4.56373	0	0.999069	1
GSBRNA2T00099441001	BnaA07g22220D	LK031787	4316696	4318531	+	0.314542	3.0386	0	0.998305	1	-0.137222	3.0386	0	0.999751	1	-4.25255	3.0386	-5.76312	5.33331e-05	0.000866222
GSBRNA2T00099442001	BnaA07g22230D	LK031787	4319010	4319514	-	0.323951	1.54363	0	0.982141	1	-0.897984	1.54363	0	0.623056	1	-2.77244	1.54363	-2.91839	0.00672156	0.0445433
GSBRNA2T00099444001	BnaA07g22240D	LK031787	4332380	4336096	-	0.430679	2.31767	0	0.970604	1	0.077966	2.31767	0	0.998854	1	-1.80925	2.31767	-1.69282	0.0587214	0.28434
GSBRNA2T00099445001	BnaA07g22250D	LK031787	4345736	4347589	+	0.33319	2.8049	0	0.994526	1	-0.394432	2.8049	0	0.990529	1	-1.13464	2.8049	-0.423896	0.339741	1
GSBRNA2T00099447001	BnaA07g22270D	LK031787	4350893	4351690	-	-0.0735286	4.26928	0	0.99998	1	-0.198426	4.26928	0	0.999885	1	-0.528899	4.26928	0	0.991807	1
GSBRNA2T00099448001	BnaA07g22280D	LK031787	4351750	4352266	-	-0.220844	3.59379	0	0.99847	1	-0.121977	3.59379	0	0.999218	1	-0.908193	3.59379	0	0.637365	1
GSBRNA2T00099450001	BnaA07g22300D	LK031787	4355333	4358843	+	-0.373156	3.10063	0	0.988087	1	-0.291321	3.10063	0	0.989644	1	1.74457	3.10063	3.72258	0.0015605	0.0130306
GSBRNA2T00099451001	BnaA07g22310D	LK031787	4359214	4360396	+	-1.13166	5.036	-0.719141	0.243199	1	0.78541	5.036	0	0.86399	1	0.470635	5.036	0	0.995621	1
GSBRNA2T00099452001	BnaA07g22320D	LK031787	4360704	4365405	+	-0.629739	4.90842	0	0.987799	1	0.239493	4.90842	0	0.999876	1	-0.412929	4.90842	0	0.999049	1
GSBRNA2T00099456001	BnaA07g22360D	LK031787	4374495	4376656	-	-0.617708	1.53984	0	0.78018	1	0.920719	1.53984	0	0.567249	1	3.45761	1.53984	7.29133	6.07369e-06	0.00018245
GSBRNA2T00099467001	BnaA07g22450D	LK031787	4401831	4405093	-	0.153046	4.26834	0	0.999548	1	-0.224962	4.26834	0	0.999047	1	-0.568472	4.26834	0	0.960526	1
GSBRNA2T00099471001	BnaA07g22490D	LK031787	4421832	4424092	+	-0.490819	3.12776	0	0.9701	1	-0.158426	3.12776	0	0.996211	1	0.107756	3.12776	0	0.998716	1
GSBRNA2T00099472001	BnaA07g22500D	LK031787	4424767	4425944	+	-0.323347	3.11539	0	0.997263	1	-0.243279	3.11539	0	0.997839	1	-0.426128	3.11539	0	0.98809	1
GSBRNA2T00099474001	BnaA07g22510D	LK031787	4430555	4434221	+	-1.06922	1.06311	-0.115229	0.457696	1	-0.13669	1.06311	0	0.944708	1	3.33024	1.06311	6.07288	3.32666e-05	0.000611034
GSBRNA2T00099475001	BnaA07g22520D	LK031787	4434589	4435225	-	1.01295	1.44995	0.0359706	0.48603	1	0.161972	1.44995	0	0.994301	1	0.911547	1.44995	0	0.58791	1
GSBRNA2T00099476001	BnaA07g22530D	LK031787	4436041	4439173	+	-0.438611	3.81493	0	0.988798	1	0.399339	3.81493	0	0.991893	1	-0.179422	3.81493	0	0.998514	1
ENSRNA049473113	MIR159	LK031787	4451386	4451587	+	0.703049	0.610133	0	0.841918	1	-1.75416	0.610133	-2.09785	0.0293674	1	-3.93677	0.610133	-4.10462	0.000805298	0.00754134
GSBRNA2T00099483001	BnaA07g22580D	LK031787	4465163	4468858	-	0.00440062	2.05424	0	0.999601	1	0.184146	2.05424	0	0.983332	1	1.17425	2.05424	0.527836	0.303835	1
GSBRNA2T00099492001	BnaA07g22620D	LK031787	4495133	4500142	-	-0.124532	4.23284	0	0.997236	1	0.0260073	4.23284	0	0.99948	1	-7.91649	4.23284	-5.06849	0.000174037	0.00219333
GSBRNA2T00099496001	BnaA07g22640D	LK031787	4512691	4513714	+	0.981525	4.22284	0	0.528926	1	1.46783	4.22284	2.43885	0.0160005	1	2.45386	4.22284	6.20114	2.75026e-05	0.000525901
GSBRNA2T00099497001	BnaA07g22650D	LK031787	4516501	4520592	-	0.982625	2.08436	0	0.517263	1	0.297352	2.08436	0	0.978812	1	3.57084	2.08436	7.41246	5.18453e-06	0.000162845
GSBRNA2T00099499001	BnaA07g22670D	LK031787	4524186	4530284	-	0.305265	4.97938	0	0.99973	1	-0.101683	4.97938	0	0.999977	1	-0.53834	4.97938	0	0.991965	1
GSBRNA2T00099500001	BnaA07g22680D	LK031787	4531413	4535155	+	0.0571098	2.88398	0	0.999894	1	0.242451	2.88398	0	0.999327	1	-2.53606	2.88398	-4.12527	0.000767374	0.00723058
GSBRNA2T00099504001	BnaA07g22700D	LK031787	4542613	4544317	+	0.517194	2.64495	0	0.974069	1	-0.054955	2.64495	0	0.999801	1	0.479068	2.64495	0	0.974224	1
GSBRNA2T00099506001	BnaA07g22710D	LK031787	4546176	4547723	+	-0.0587143	2.52908	0	0.99916	1	-0.209144	2.52908	0	0.994913	1	0.290821	2.52908	0	0.991148	1
GSBRNA2T00099509001	BnaA07g22740D	LK031787	4553471	4555883	+	0.109246	0.646781	0	0.99503	1	-0.43963	0.646781	0	0.945739	1	-5.01027	0.646781	-5.18611	0.000133177	0.00177174
GSBRNA2T00099511001	BnaA07g22750D	LK031787	4558920	4559528	+	-0.100665	3.16597	0	0.971744	1	0.937091	3.16597	0	0.552207	1	6.06134	3.16597	12.7374	1.99685e-08	4.3312e-06
GSBRNA2T00099512001	BnaA07g22760D	LK031787	4561360	4563096	+	-0.299799	3.98671	0	0.997367	1	0.334564	3.98671	0	0.996533	1	0.38331	3.98671	0	0.995083	1
GSBRNA2T00099516001	BnaA07g22800D	LK031787	4573406	4577098	-	0.192141	4.68282	0	0.999961	1	-0.0432611	4.68282	0	0.999996	1	0.285931	4.68282	0	0.999848	1
GSBRNA2T00099517001	BnaA07g22810D	LK031787	4577251	4578160	+	-0.590065	1.36534	0	0.83814	1	0.642491	1.36534	0	0.809661	1	0.307048	1.36534	0	0.958667	1
GSBRNA2T00099522001	BnaA07g22850D	LK031787	4589931	4592826	-	0.0136531	3.74048	0	0.999994	1	-0.173964	3.74048	0	0.999856	1	-0.667427	3.74048	0	0.946702	1
GSBRNA2T00099523001	BnaA07g22860D	LK031787	4593436	4597687	-	0.533242	1.04252	0	0.84827	1	0.0686191	1.04252	0	0.991354	1	-0.382824	1.04252	0	0.871064	1
GSBRNA2T00099525001	BnaA07g22870D	LK031787	4601511	4602873	-	0.292227	4.6048	0	0.999893	1	-0.0158782	4.6048	0	0.999999	1	-0.0682274	4.6048	0	0.999986	1
GSBRNA2T00099527001	BnaA07g22890D	LK031787	4608288	4612915	+	0.218039	3.97895	0	0.999881	1	-0.0699482	3.97895	0	0.999983	1	-1.12148	3.97895	-0.617985	0.274309	1
GSBRNA2T00099531001	BnaA07g22920D	LK031787	4634283	4636810	+	0.106017	3.80091	0	0.999952	1	0.0295961	3.80091	0	0.99999	1	-0.348654	3.80091	0	0.998233	1
GSBRNA2T00099532001	BnaA07g22930D	LK031787	4637655	4639309	-	-0.254472	3.33923	0	0.997839	1	0.382303	3.33923	0	0.993986	1	-0.0589408	3.33923	0	0.999634	1
GSBRNA2T00099533001	BnaA07g22940D	LK031787	4639862	4649420	+	0.333813	3.54237	0	0.998184	1	-0.386778	3.54237	0	0.996868	1	0.61858	3.54237	0	0.96685	1
GSBRNA2T00099534001	BnaA07g22950D	LK031787	4650230	4651237	-	-0.524944	1.63269	0	0.868802	1	0.68394	1.63269	0	0.779151	1	0.596619	1.63269	0	0.855327	1
GSBRNA2T00099536001	BnaA07g22960D	LK031787	4654737	4656422	-	-0.262422	2.88792	0	0.998003	1	-0.0674184	2.88792	0	0.999651	1	-0.525849	2.88792	0	0.965629	1
GSBRNA2T00099538001	BnaA07g22980D	LK031787	4668080	4671720	-	0.0239549	3.7637	0	0.999967	1	-0.179817	3.7637	0	0.99957	1	-0.518181	3.7637	0	0.978559	1
GSBRNA2T00099546001	BnaA07g23050D	LK031787	4701423	4703565	-	-0.487702	2.09742	0	0.94185	1	0.660021	2.09742	0	0.864087	1	0.051524	2.09742	0	0.998046	1
GSBRNA2T00099548001	BnaA07g23070D	LK031787	4716685	4717417	+	-1.34665	2.09665	-0.768218	0.229042	1	0.951352	2.09665	0	0.541123	1	1.25915	2.09665	0.833065	0.210885	0.823807
GSBRNA2T00099549001	BnaA07g23080D	LK031787	4719683	4721486	+	-0.255091	6.08577	0	0.999903	1	0.332085	6.08577	0	0.999767	1	0.296058	6.08577	0	0.999847	1
GSBRNA2T00099550001	BnaA07g23090D	LK031787	4722043	4722795	-	-0.715045	3.40348	0	0.842846	1	2.53001	3.40348	6.358	2.19139e-05	0.0182952	-0.221542	3.40348	0	0.993161	1
GSBRNA2T00099555001	BnaA07g23140D	LK031787	4733641	4735811	-	-0.525576	5.05273	0	0.984599	1	-0.140873	5.05273	0	0.999505	1	-1.38018	5.05273	-1.73036	0.0551284	0.269152
GSBRNA2T00099556001	BnaA07g23150D	LK031787	4751228	4753124	+	-0.955385	2.65163	0	0.570137	1	-0.36035	2.65163	0	0.974472	1	-0.4186	2.65163	0	0.98171	1
GSBRNA2T00099557001	BnaA07g23160D	LK031787	4753231	4757334	-	-1.15187	4.7743	-0.732497	0.239259	1	0.196045	4.7743	0	0.998348	1	-0.124554	4.7743	0	0.999604	1
GSBRNA2T00099558001	BnaA07g23170D	LK031787	4765382	4766714	-	-0.848206	2.63149	0	0.713083	1	0.249487	2.63149	0	0.989694	1	0.291412	2.63149	0	0.994466	1
GSBRNA2T00099559001	BnaA07g23180D	LK031787	4767057	4769296	+	2.38811	4.24708	8.29079	1.72125e-06	0.00018993	0.0562374	4.24708	0	0.999997	1	0.32121	4.24708	0	0.996679	1
GSBRNA2T00099560001	BnaA07g23190D	LK031787	4773296	4775787	-	-0.94327	2.9104	0	0.598499	1	0.264247	2.9104	0	0.995173	1	-1.64569	2.9104	-2.20745	0.0242032	0.13412
GSBRNA2T00099561001	BnaA07g23200D	LK031787	4777422	4779491	-	-1.31361	2.57091	-1.16394	0.134006	1	-0.354128	2.57091	0	0.961123	1	0.298303	2.57091	0	0.995983	1
GSBRNA2T00099570001	BnaA07g23270D	LK031787	4802337	4804452	-	-0.0244768	3.50771	0	0.999931	1	-0.270629	3.50771	0	0.997844	1	-0.227071	3.50771	0	0.997718	1
GSBRNA2T00099575001	BnaA07g23310D	LK031787	4815545	4816150	-	-0.148002	1.5909	0	0.98798	1	-0.421676	1.5909	0	0.924043	1	-1.02652	1.5909	-0.057584	0.478011	1
GSBRNA2T00099578001	BnaA07g23320D	LK031787	4825933	4834790	+	-0.293065	1.49575	0	0.972151	1	-0.81094	1.49575	0	0.673543	1	-2.36604	1.49575	-2.26772	0.021813	0.122563
GSBRNA2T00099579001	BnaA07g23330D	LK031787	4835510	4838026	-	-0.290119	2.2775	0	0.989376	1	0.254973	2.2775	0	0.991684	1	0.145341	2.2775	0	0.996289	1
GSBRNA2T00099581001	BnaA07g23350D	LK031787	4841993	4844443	-	-0.494238	6.09338	0	0.99516	1	0.97245	6.09338	0	0.566153	1	-2.67048	6.09338	-8.23927	1.83192e-06	7.74199e-05
GSBRNA2T00099585001	BnaA07g23360D	LK031787	4877942	4878974	+	-5.62839	-0.186025	-6.7656	1.26813e-05	0.000903576	1.1911	-0.186025	0.208795	0.436474	1	1.07007	-0.186025	0.285087	0.390323	1
GSBRNA2T00099587001	BnaA07g23380D	LK031787	4884086	4886156	-	-1.4282	2.6055	-1.45468	0.0862421	1	0.189301	2.6055	0	0.985107	1	0.68693	2.6055	0	0.909704	1
GSBRNA2T00099588001	BnaA07g23390D	LK031787	4886811	4890446	-	-0.56022	2.52718	0	0.965371	1	-0.131542	2.52718	0	0.998323	1	-0.919737	2.52718	0	0.617019	1
GSBRNA2T00099589001	BnaA07g23400D	LK031787	4893709	4900846	-	-0.34932	3.28421	0	0.997211	1	-0.132873	3.28421	0	0.999454	1	0.325613	3.28421	0	0.998103	1
GSBRNA2T00099590001	BnaA07g23410D	LK031787	4902916	4905966	-	-1.68187	3.29383	-2.58539	0.0122763	0.300942	0.218669	3.29383	0	0.988049	1	0.502153	3.29383	0	0.985543	1
GSBRNA2T00099591001	BnaA07g23420D	LK031787	4906227	4907485	+	-0.42141	1.51536	0	0.962986	1	-0.152309	1.51536	0	0.990445	1	-0.301642	1.51536	0	0.975551	1
GSBRNA2T00099594001	BnaA07g23440D	LK031787	4927786	4931260	+	-1.23276	3.70198	-1.24757	0.118487	1	0.567759	3.70198	0	0.975119	1	-0.528046	3.70198	0	0.988456	1
GSBRNA2T00099610001	BnaA07g23540D	LK031787	4984748	4986356	+	-0.442039	5.54712	0	0.999668	1	0.243438	5.54712	0	0.999973	1	-0.25824	5.54712	0	0.999965	1
GSBRNA2T00099612001	BnaA07g23560D	LK031787	4990809	4997661	+	-0.889677	5.00577	0	0.767339	1	0.131546	5.00577	0	0.99995	1	-0.979459	5.00577	0	0.551774	1
GSBRNA2T00099613001	BnaA07g23570D	LK031787	4997770	5000840	-	-0.939286	2.18998	0	0.561085	1	0.340204	2.18998	0	0.933419	1	0.292753	2.18998	0	0.971472	1
GSBRNA2T00099614001	BnaA07g23580D	LK031787	5001110	5002142	+	-0.119512	1.80159	0	0.99631	1	-0.158296	1.80159	0	0.993371	1	-0.0586567	1.80159	0	0.99735	1
GSBRNA2T00099617001	BnaA07g23610D	LK031787	5006667	5010284	-	0.0969242	5.12576	0	0.999982	1	-0.158835	5.12576	0	0.999961	1	0.382461	5.12576	0	0.999447	1
GSBRNA2T00099619001	BnaA07g23620D	LK031787	5011846	5013454	+	-0.27031	4.01174	0	0.999089	1	0.269351	4.01174	0	0.999109	1	0.893647	4.01174	0	0.72954	1
GSBRNA2T00099624001	BnaA07g23660D	LK031787	5024408	5026049	+	-0.0720751	3.90746	0	0.999978	1	-0.0329268	3.90746	0	0.99999	1	-1.41643	3.90746	-2.04487	0.0322153	0.17051
GSBRNA2T00099626001	BnaA07g23670D	LK031787	5040415	5043855	-	0.173742	3.5406	0	0.999859	1	-0.692215	3.5406	0	0.949725	1	-1.88512	3.5406	-3.45186	0.00253751	0.0196328
GSBRNA2T00099629001	BnaA07g23680D	LK031787	5050104	5051171	+	-0.154459	5.73354	0	0.999248	1	-0.256137	5.73354	0	0.997986	1	-9.5927	5.73354	-7.99762	2.75543e-06	0.000105365
GSBRNA2T00099632001	BnaA07g23700D	LK031787	5066755	5067470	+	-0.0394999	1.53253	0	0.997958	1	-0.276939	1.53253	0	0.975064	1	-1.21409	1.53253	-0.476466	0.321527	1
GSBRNA2T00099634001	BnaA07g23720D	LK031787	5078601	5080456	+	-0.417	2.44477	0	0.97939	1	-0.0774233	2.44477	0	0.998229	1	-0.416884	2.44477	0	0.97002	1
GSBRNA2T00099635001	BnaA07g23730D	LK031787	5085168	5085803	-	-1.19577	1.33126	-0.482912	0.319196	1	1.51749	1.33126	1.32203	0.105935	1	-1.10605	1.33126	-0.239643	0.407671	1
GSBRNA2T00099639001	BnaA07g23770D	LK031787	5103811	5105703	-	-0.462518	3.63148	0	0.982007	1	-0.0785065	3.63148	0	0.999132	1	-0.141751	3.63148	0	0.998553	1
GSBRNA2T00099640001	BnaA07g23780D	LK031787	5106013	5110493	-	0.6852	2.22317	0	0.860332	1	0.18685	2.22317	0	0.997557	1	0.329009	2.22317	0	0.972684	1
GSBRNA2T00099641001	BnaA07g23790D	LK031787	5110767	5111486	+	-1.30712	4.21564	-1.78806	0.050048	0.941548	0.376911	4.21564	0	0.99705	1	0.443838	4.21564	0	0.998559	1
GSBRNA2T00099648001	BnaA07g23850D	LK031787	5130990	5133188	+	-3.01265	0.821915	-3.26631	0.00356889	0.10997	0.61442	0.821915	0	0.718726	1	-3.00253	0.821915	-2.93873	0.00649517	0.0433351
GSBRNA2T00099649001	BnaA07g23860D	LK031787	5138016	5138882	+	-0.26878	1.7755	0	0.984229	1	0.359189	1.7755	0	0.974072	1	-0.105621	1.7755	0	0.993832	1
GSBRNA2T00099650001	BnaA07g23870D	LK031787	5141928	5144518	+	-0.426016	1.83055	0	0.953092	1	-0.391389	1.83055	0	0.943115	1	-1.65859	1.83055	-1.41051	0.0924774	0.417077
GSBRNA2T00099653001	BnaA07g23890D	LK031787	5153879	5156447	+	1.8081	0.130521	2.30534	0.0203349	0.458369	-3.05934	0.130521	-4.35863	0.000513642	0.125567	-5.1339	0.130521	-4.80081	0.000250862	0.00293499
GSBRNA2T00099654001	BnaA07g23900D	LK031787	5159011	5159506	-	2.03068	1.2419	2.17555	0.0256292	0.55346	0.347446	1.2419	0	0.974929	1	2.31967	1.2419	2.737	0.00932935	0.0589568
GSBRNA2T00099655001	BnaA07g23910D	LK031787	5159614	5160494	-	1.20532	2.27737	0.511989	0.309249	1	0.657872	2.27737	0	0.874952	1	2.17387	2.27737	3.0362	0.00540158	0.0371305
GSBRNA2T00099659001	BnaA07g23930D	LK031787	5172122	5174175	+	-0.466751	1.76885	0	0.946882	1	-0.0756658	1.76885	0	0.995063	1	0.445452	1.76885	0	0.963229	1
GSBRNA2T00099660001	BnaA07g23940D	LK031787	5174655	5175553	-	0.0380844	2.51156	0	0.999192	1	0.57465	2.51156	0	0.94427	1	0.0967796	2.51156	0	0.996688	1
GSBRNA2T00099661001	BnaA07g23950D	LK031787	5178577	5181428	-	-0.181195	3.70576	0	0.999705	1	0.00700208	3.70576	0	0.999992	1	0.0523944	3.70576	0	0.999924	1
GSBRNA2T00099663001	BnaA07g23960D	LK031787	5183535	5184680	-	0.280253	1.3557	0	0.960794	1	-0.484081	1.3557	0	0.892601	1	-0.229775	1.3557	0	0.950911	1
GSBRNA2T00099666001	BnaA07g23980D	LK031787	5190124	5196356	-	-0.716461	5.0408	0	0.965208	1	-0.383218	5.0408	0	0.999143	1	0.162274	5.0408	0	0.999967	1
GSBRNA2T00125682001	BnaC01g24430D	LK031788	65426	67389	+	0.00452478	4.19259	0	0.999998	1	-0.000167913	4.19259	0	1	1	0.42799	4.19259	0	0.998025	1
GSBRNA2T00125705001	BnaC01g24480D	LK031788	243680	246645	+	-0.168446	5.0823	0	0.999788	1	-0.30732	5.0823	0	0.998964	1	-1.48141	5.0823	-2.3672	0.0182006	0.105108
GSBRNA2T00125716001	BnaC01g24540D	LK031788	359680	362054	-	0.0149318	4.1541	0	0.999996	1	0.161921	4.1541	0	0.999945	1	0.0894482	4.1541	0	0.999959	1
GSBRNA2T00125738001	BnaC01g24560D	LK031788	496893	499186	+	-0.436539	3.35021	0	0.997678	1	0.175424	3.35021	0	0.999844	1	-5.41733	3.35021	-7.85095	3.01699e-06	0.000112276
GSBRNA2T00125745001	BnaC01g24570D	LK031788	555748	558474	-	-0.0632547	4.48765	0	0.999866	1	0.0603096	4.48765	0	0.999872	1	0.224025	4.48765	0	0.99903	1
GSBRNA2T00125746001	BnaC01g24580D	LK031788	559069	561291	-	0.0866062	3.54683	0	0.999826	1	-0.0604374	3.54683	0	0.999889	1	0.307479	3.54683	0	0.997829	1
GSBRNA2T00125760001	BnaC01g24640D	LK031788	644098	646265	+	-0.0385922	3.49358	0	0.999873	1	-0.0139977	3.49358	0	0.999952	1	0.207752	3.49358	0	0.99859	1
GSBRNA2T00125763001	BnaC01g24660D	LK031788	663089	664635	+	-0.140424	5.09974	0	0.999735	1	1.10312	5.09974	0.590556	0.283116	1	0.691764	5.09974	0	0.943883	1
GSBRNA2T00125764001	BnaC01g24670D	LK031788	664712	664969	+	-0.404609	2.68804	0	0.975791	1	1.0368	2.68804	0.146887	0.442883	1	0.634686	2.68804	0	0.91582	1
GSBRNA2T00125771001	BnaC01g24700D	LK031788	700977	702744	+	1.03464	3.14462	0.134509	0.447665	1	0.0338098	3.14462	0	0.999846	1	2.07464	3.14462	4.3577	0.000513277	0.00522696
GSBRNA2T00125783001	BnaC01g24790D	LK031788	776949	781996	-	-0.452618	4.1598	0	0.991812	1	0.364849	4.1598	0	0.996236	1	-0.324967	4.1598	0	0.996625	1
GSBRNA2T00125784001	BnaC01g24800D	LK031788	782104	782554	-	-0.00308726	1.65604	0	0.999741	1	-0.07568	1.65604	0	0.993032	1	-0.68157	1.65604	0	0.75261	1
GSBRNA2T00125810001	BnaC01g24940D	LK031788	1003161	1004768	+	0.0912648	2.38427	0	0.994123	1	-0.137106	2.38427	0	0.990744	1	0.0980202	2.38427	0	0.991096	1
GSBRNA2T00125822001	BnaC01g25000D	LK031788	1053403	1055555	-	-0.235614	3.47186	0	0.99837	1	0.0454019	3.47186	0	0.9998	1	-1.03552	3.47186	-0.136456	0.446912	1
GSBRNA2T00125824001	BnaC01g25010D	LK031788	1071909	1072966	-	0.504401	1.24158	0	0.869123	1	0.104556	1.24158	0	0.988642	1	0.796259	1.24158	0	0.676102	1
GSBRNA2T00125826001	BnaC01g25020D	LK031788	1074752	1075417	+	-0.349123	2.00166	0	0.966804	1	0.632786	2.00166	0	0.871289	1	0.397944	2.00166	0	0.96224	1
GSBRNA2T00125828001	BnaC01g25030D	LK031788	1101191	1103863	-	0.457122	2.10733	0	0.966777	1	-0.263916	2.10733	0	0.992449	1	-2.68687	2.10733	-2.9292	0.00658422	0.0438169
GSBRNA2T00125848001	BnaC01g25080D	LK031788	1238132	1238871	+	-0.168498	1.8464	0	0.990912	1	0.11122	1.8464	0	0.994294	1	-0.0898716	1.8464	0	0.99357	1
GSBRNA2T00125849001	BnaC01g25090D	LK031788	1239044	1239849	+	0.203218	2.48756	0	0.991777	1	-0.40859	2.48756	0	0.964154	1	-0.0578331	2.48756	0	0.996599	1
GSBRNA2T00125871001	BnaC01g25190D	LK031788	1489257	1494552	+	0.073299	2.77013	0	0.996894	1	0.167122	2.77013	0	0.993412	1	2.16629	2.77013	4.53146	0.000381841	0.00409991
GSBRNA2T00125872001	BnaC01g25200D	LK031788	1501284	1502713	+	1.17424	1.10818	0.440894	0.333807	1	-0.363778	1.10818	0	0.962065	1	-0.398555	1.10818	0	0.870099	1
GSBRNA2T00125873001	BnaC01g25210D	LK031788	1506369	1506887	-	1.29558	3.43066	1.6507	0.0628983	1	-0.13483	3.43066	0	0.999953	1	0.0200155	3.43066	0	0.999878	1
GSBRNA2T00125874001	BnaC01g25220D	LK031788	1513919	1515248	+	-0.412378	2.42393	0	0.978671	1	0.0191885	2.42393	0	0.999578	1	-0.335512	2.42393	0	0.982308	1
GSBRNA2T00125882001	BnaC01g25250D	LK031788	1623698	1625194	-	-0.114197	2.44891	0	0.996268	1	0.426998	2.44891	0	0.970631	1	0.115259	2.44891	0	0.995128	1
GSBRNA2T00125895001	BnaC01g25340D	LK031788	1699074	1701651	-	0.248723	3.60633	0	0.999309	1	-0.0619553	3.60633	0	0.999935	1	0.845492	3.60633	0	0.798451	1
GSBRNA2T00125907001	BnaC01g25380D	LK031788	1791987	1793954	+	0.0242733	6.18317	0	0.999999	1	0.00412075	6.18317	0	1	1	-0.168059	6.18317	0	0.999988	1
GSBRNA2T00125923001	BnaC01g25430D	LK031788	1931078	1933337	-	0.119249	5.64655	0	0.999935	1	0.122652	5.64655	0	0.999938	1	0.627019	5.64655	0	0.981213	1
GSBRNA2T00125936001	BnaC01g25480D	LK031788	2036502	2039215	-	0.0894215	2.69631	0	0.999557	1	0.28864	2.69631	0	0.997843	1	-0.304702	2.69631	0	0.991771	1
GSBRNA2T00125955001	BnaC01g25550D	LK031788	2214008	2214781	-	0.247461	2.0114	0	0.968873	1	0.295909	2.0114	0	0.970802	1	0.673701	2.0114	0	0.797474	1
GSBRNA2T00125964001	BnaC01g25570D	LK031788	2447355	2449697	+	0.584659	2.25542	0	0.827125	1	-1.41995	2.25542	-0.799939	0.220307	1	2.15089	2.25542	2.99673	0.00580468	0.0394782
GSBRNA2T00125990001	BnaC01g25630D	LK031788	2618576	2623879	-	0.191047	1.04816	0	0.978381	1	-1.42164	1.04816	-0.888808	0.1963	1	-2.29077	1.04816	-1.90378	0.0413395	0.210591
GSBRNA2T00126015001	BnaC01g25740D	LK031788	2868338	2868771	+	-0.28467	1.47768	0	0.971207	1	-0.0970783	1.47768	0	0.990523	1	-0.179825	1.47768	0	0.979534	1
GSBRNA2T00126016001	BnaC01g25750D	LK031788	2868824	2870833	+	-0.133633	4.96264	0	0.999958	1	0.0211653	4.96264	0	0.999995	1	-0.10783	4.96264	0	0.999958	1
GSBRNA2T00126018001	BnaC01g25760D	LK031788	2875030	2878332	+	-0.0469124	6.29277	0	0.999966	1	0.00112667	6.29277	0	0.999999	1	0.59231	6.29277	0	0.983892	1
GSBRNA2T00126019001	BnaC01g25770D	LK031788	2878579	2879790	-	0.365946	1.09176	0	0.91443	1	-0.512007	1.09176	0	0.849969	1	0.287942	1.09176	0	0.924503	1
GSBRNA2T00126022001	BnaC01g25780D	LK031788	2892574	2894734	+	0.27039	1.06318	0	0.939986	1	0.384724	1.06318	0	0.922671	1	0.54469	1.06318	0	0.825175	1
GSBRNA2T00126027001	BnaC01g25820D	LK031788	2921098	2925287	-	-0.0696518	6.17997	0	0.999996	1	-0.0509495	6.17997	0	0.999997	1	-0.0331758	6.17997	0	0.999998	1
GSBRNA2T00126029001	BnaC01g25830D	LK031788	2926326	2927593	+	0.00879438	4.25204	0	0.999997	1	0.0578352	4.25204	0	0.99998	1	0.138702	4.25204	0	0.999905	1
GSBRNA2T00126030001	BnaC01g25840D	LK031788	2933089	2937654	+	0.0651383	2.37228	0	0.998683	1	-0.458943	2.37228	0	0.958899	1	0.323427	2.37228	0	0.984579	1
GSBRNA2T00126035001	BnaC01g25850D	LK031788	2961815	2963341	-	-1.36892	4.10262	-2.04413	0.0322565	0.66758	-0.0638532	4.10262	0	0.999824	1	-2.89031	4.10262	-7.12572	7.55599e-06	0.00021054
GSBRNA2T00126038001	BnaC01g25860D	LK031788	3059162	3061854	+	0.022637	2.61909	0	0.999699	1	0.853044	2.61909	0	0.737051	1	-1.681	2.61909	-1.69011	0.0589553	0.285286
GSBRNA2T00126045001	BnaC01g25910D	LK031788	3113830	3115374	+	-0.454634	2.74132	0	0.976134	1	0.224233	2.74132	0	0.995074	1	0.00950445	2.74132	0	0.999877	1
GSBRNA2T00126050001	BnaC01g25940D	LK031788	3132462	3134471	+	-0.0733143	1.21482	0	0.992835	1	0.19796	1.21482	0	0.979851	1	0.971212	1.21482	0	0.533255	1
GSBRNA2T00126055001	BnaC01g25960D	LK031788	3179168	3182491	-	0.109904	2.91136	0	0.988537	1	-0.675089	2.91136	0	0.779471	1	2.25726	2.91136	3.96776	0.0010107	0.00911566
GSBRNA2T00126064001	BnaC01g26020D	LK031788	3266099	3268323	+	-0.285593	4.71625	0	0.999625	1	0.179389	4.71625	0	0.999875	1	-0.16946	4.71625	0	0.999854	1
GSBRNA2T00126072001	BnaC01g26050D	LK031788	3311041	3312297	-	-1.60445	0.983698	-0.466355	0.359097	1	3.18012	0.983698	1.88741	0.0441629	1	9.35286	0.983698	10.3722	1.91154e-07	1.80093e-05
GSBRNA2T00126073001	BnaC01g26060D	LK031788	3329455	3330757	-	-0.0331552	-2.25772	0	0.984862	1	0.0184659	-2.25772	0	0.991569	1	8.30806	-2.25772	11.5104	6.19387e-08	9.07504e-06
GSBRNA2T00126082001	BnaC01g26100D	LK031788	3418708	3419689	+	0.149435	3.64692	0	0.999384	1	0.00601594	3.64692	0	0.999984	1	0.5262	3.64692	0	0.97952	1
GSBRNA2T00126089001	BnaC01g26120D	LK031788	3496659	3499515	-	-0.208684	3.13426	0	0.999012	1	-0.094105	3.13426	0	0.999596	1	0.625729	3.13426	0	0.962769	1
GSBRNA2T00126094001	BnaC01g26140D	LK031788	3558449	3563681	-	0.291586	4.24833	0	0.99939	1	-0.185411	4.24833	0	0.999818	1	-0.234143	4.24833	0	0.999204	1
GSBRNA2T00126096001	BnaC01g26160D	LK031788	3570021	3572891	+	0.253748	4.49837	0	0.999838	1	0.0375079	4.49837	0	0.999993	1	0.645197	4.49837	0	0.982107	1
GSBRNA2T00126098001	BnaC01g26170D	LK031788	3579462	3582676	-	0.491215	0.751673	0	0.910007	1	-0.147828	0.751673	0	0.989528	1	-1.63934	0.751673	-1.14617	0.13777	0.581907
GSBRNA2T00126106001	BnaC01g26200D	LK031788	3737172	3739177	+	-0.0118302	3.38677	0	0.999972	1	0.418794	3.38677	0	0.995466	1	-0.0222459	3.38677	0	0.999905	1
GSBRNA2T00126109001	BnaC01g26220D	LK031788	3852846	3854806	-	-0.0986638	3.8998	0	0.999902	1	0.0517232	3.8998	0	0.999952	1	-0.738221	3.8998	0	0.887864	1
GSBRNA2T00126123001	BnaC01g26290D	LK031788	3950086	3951139	+	0.0804934	4.36024	0	0.999944	1	0.130253	4.36024	0	0.999915	1	2.77773	4.36024	12.1959	3.10925e-08	5.70863e-06
GSBRNA2T00126131001	BnaC01g26330D	LK031788	4078402	4080057	+	0.170511	2.76761	0	0.998176	1	-0.625162	2.76761	0	0.920362	1	-0.672024	2.76761	0	0.857249	1
GSBRNA2T00126133001	BnaC01g26350D	LK031788	4085948	4086736	+	-0.331281	7.18234	0	0.999956	1	0.214814	7.18234	0	0.99999	1	0.0630779	7.18234	0	0.999999	1
GSBRNA2T00126142001	BnaC01g26420D	LK031788	4185095	4188177	-	0.0834082	4.12344	0	0.999934	1	-0.00890661	4.12344	0	0.999994	1	-0.111301	4.12344	0	0.999812	1
GSBRNA2T00126150001	BnaC01g26470D	LK031788	4223598	4224913	+	0.50371	1.78684	0	0.943011	1	-0.497621	1.78684	0	0.945199	1	0.0884268	1.78684	0	0.993781	1
GSBRNA2T00126152001	BnaC01g26480D	LK031788	4233973	4234869	+	-0.24786	1.11143	0	0.962171	1	-0.214086	1.11143	0	0.960772	1	-0.778246	1.11143	0	0.673359	1
GSBRNA2T00126156001	BnaC01g26510D	LK031788	4258059	4259680	-	-0.485089	3.87379	0	0.996853	1	-0.103712	3.87379	0	0.999931	1	-1.13327	3.87379	-0.715835	0.244181	0.925996
GSBRNA2T00126159001	BnaC01g26530D	LK031788	4306600	4308346	+	0.116227	4.37655	0	0.999893	1	-0.14943	4.37655	0	0.99984	1	-0.0737411	4.37655	0	0.999891	1
GSBRNA2T00126170001	BnaC01g26580D	LK031788	4432138	4434547	+	0.500469	3.31542	0	0.972947	1	0.0216457	3.31542	0	0.999893	1	0.513387	3.31542	0	0.962988	1
GSBRNA2T00130223001	BnaC01g08670D	LK031789	10195	17866	+	0.184777	4.7311	0	0.999848	1	-0.0913778	4.7311	0	0.999952	1	0.236568	4.7311	0	0.999655	1
GSBRNA2T00130225001	BnaC01g08650D	LK031789	20885	23104	-	-0.122565	4.85013	0	0.999764	1	-0.128881	4.85013	0	0.999713	1	0.411821	4.85013	0	0.995879	1
GSBRNA2T00130226001	BnaC01g08640D	LK031789	23517	25163	-	0.139642	4.12001	0	0.999907	1	-0.429471	4.12001	0	0.997358	1	0.3113	4.12001	0	0.999241	1
GSBRNA2T00130227001	BnaC01g08630D	LK031789	25285	26531	+	-0.210184	3.44293	0	0.999658	1	-0.00342196	3.44293	0	0.999996	1	0.0226799	3.44293	0	0.999972	1
GSBRNA2T00130228001	BnaC01g08620D	LK031789	26728	28305	-	0.183948	2.83217	0	0.994584	1	-0.0997727	2.83217	0	0.997739	1	1.33988	2.83217	1.34423	0.102385	0.454395
GSBRNA2T00130229001	BnaC01g08610D	LK031789	29600	30907	-	0.281386	3.20024	0	0.997404	1	0.112684	3.20024	0	0.99966	1	0.748619	3.20024	0	0.871654	1
GSBRNA2T00130230001	BnaC01g08600D	LK031789	30963	33593	-	-0.24186	2.31995	0	0.99544	1	0.262673	2.31995	0	0.994752	1	-0.106975	2.31995	0	0.997933	1
GSBRNA2T00130231001	BnaC01g08590D	LK031789	33781	34555	+	-0.383785	4.05598	0	0.998046	1	0.281694	4.05598	0	0.999281	1	-0.653763	4.05598	0	0.951566	1
GSBRNA2T00130232001	BnaC01g08580D	LK031789	35068	43419	-	0.185923	5.12016	0	0.999908	1	-0.434456	5.12016	0	0.998239	1	2.54054	5.12016	10.9043	1.02516e-07	1.19058e-05
GSBRNA2T00130234001	BnaC01g08560D	LK031789	57201	57786	-	0.00464168	2.05629	0	0.999871	1	0.283385	2.05629	0	0.988905	1	-3.44812	2.05629	-3.58733	0.00200548	0.016146
GSBRNA2T00130243001	BnaC01g08520D	LK031789	85797	87310	-	0.155655	4.02842	0	0.999872	1	-0.399362	4.02842	0	0.997939	1	0.0142437	4.02842	0	0.999985	1
GSBRNA2T00130245001	BnaC01g08510D	LK031789	90062	92194	+	0.249681	4.62367	0	0.999922	1	0.109393	4.62367	0	0.999988	1	0.225033	4.62367	0	0.999912	1
GSBRNA2T00130247001	BnaC01g08490D	LK031789	93724	94905	-	-0.0430218	3.04822	0	0.999899	1	-0.0633516	3.04822	0	0.999831	1	0.134283	3.04822	0	0.999436	1
GSBRNA2T00130248001	BnaC01g08480D	LK031789	94964	97889	-	0.116545	4.30121	0	0.999947	1	0.230383	4.30121	0	0.999863	1	0.919912	4.30121	0	0.696744	1
GSBRNA2T00130249001	BnaC01g08470D	LK031789	97961	99985	+	0.0564442	4.97119	0	0.999985	1	-0.132226	4.97119	0	0.999955	1	0.432336	4.97119	0	0.998605	1
GSBRNA2T00130250001	BnaC01g08460D	LK031789	100672	115236	-	-0.25144	1.66842	0	0.993029	1	-0.482163	1.66842	0	0.948095	1	-2.15014	1.66842	-2.58745	0.0122383	0.0744462
GSBRNA2T00130251001	BnaC01g08450D	LK031789	139080	141578	+	-0.298382	0.902867	0	0.963676	1	-0.270208	0.902867	0	0.958272	1	-2.81826	0.902867	-2.70037	0.0100223	0.0626632
GSBRNA2T00130253001	BnaC01g08430D	LK031789	143521	147530	-	-0.0653731	2.75396	0	0.999499	1	-0.297324	2.75396	0	0.993517	1	-0.680556	2.75396	0	0.861389	1
GSBRNA2T00130254001	BnaC01g08420D	LK031789	152799	156316	+	-0.158276	4.97458	0	0.99938	1	0.0348227	4.97458	0	0.999892	1	0.36979	4.97458	0	0.995619	1
GSBRNA2T00130255001	BnaC01g08410D	LK031789	161206	162724	-	0.225259	2.89393	0	0.998159	1	-0.372838	2.89393	0	0.992532	1	0.590019	2.89393	0	0.95669	1
GSBRNA2T00130258001	BnaC01g08380D	LK031789	170449	172733	-	0.35773	3.20538	0	0.994916	1	-0.268467	3.20538	0	0.997916	1	-0.143421	3.20538	0	0.998059	1
GSBRNA2T00130261001	BnaC01g08350D	LK031789	186426	190311	+	-0.139873	5.89907	0	0.999965	1	-0.399757	5.89907	0	0.999224	1	-1.6734	5.89907	-4.17995	0.000697377	0.00666614
GSBRNA2T00130264001	BnaC01g08330D	LK031789	210258	213457	-	0.449419	3.057	0	0.932813	1	-0.081687	3.057	0	0.995411	1	0.987388	3.057	0	0.514429	1
GSBRNA2T00130265001	BnaC01g08320D	LK031789	218110	220857	-	-0.171336	0.941885	0	0.953172	1	-0.324135	0.941885	0	0.891108	1	-0.119245	0.941885	0	0.963074	1
GSBRNA2T00130266001	BnaC01g08310D	LK031789	224579	225434	-	-0.0978813	1.93996	0	0.993517	1	0.60501	1.93996	0	0.885844	1	0.384746	1.93996	0	0.954517	1
GSBRNA2T00130270001	BnaC01g08280D	LK031789	239897	242735	-	-3.33487	1.6551	-5.14161	0.000139944	0.00704464	0.537754	1.6551	0	0.797223	1	-3.60899	1.6551	-4.65442	0.000312304	0.00348169
GSBRNA2T00130278001	BnaC01g08230D	LK031789	307565	314318	+	-0.126239	4.08114	0	0.999942	1	-0.00613473	4.08114	0	0.999998	1	-0.136566	4.08114	0	0.999888	1
GSBRNA2T00130281001	BnaC01g08210D	LK031789	328019	334189	+	-0.0100896	5.28888	0	0.999999	1	0.108096	5.28888	0	0.99999	1	-1.1774	5.28888	-1.18408	0.130129	0.555117
GSBRNA2T00130286001	BnaC01g08200D	LK031789	392048	395552	-	-0.183481	4.3185	0	0.999929	1	-0.219378	4.3185	0	0.999864	1	-1.38988	4.3185	-2.0904	0.0297498	0.15929
GSBRNA2T00130288001	BnaC01g08190D	LK031789	415571	419470	+	0.215412	4.47353	0	0.999766	1	0.0607462	4.47353	0	0.999971	1	-0.468199	4.47353	0	0.992597	1
GSBRNA2T00130291001	BnaC01g08170D	LK031789	426000	427894	-	0.240797	3.74977	0	0.999659	1	-0.0629925	3.74977	0	0.999966	1	-0.247527	3.74977	0	0.999013	1
GSBRNA2T00130293001	BnaC01g08150D	LK031789	437115	438665	-	-1.23206	0.806982	-0.72679	0.240947	1	-0.515241	0.806982	0	0.86808	1	-4.27438	0.806982	-4.64074	0.000322401	0.003575
GSBRNA2T00130295001	BnaC01g08140D	LK031789	442081	443931	-	0.0412085	4.25932	0	0.999967	1	0.00228259	4.25932	0	0.999998	1	0.311853	4.25932	0	0.998954	1
GSBRNA2T00130296001	BnaC01g08130D	LK031789	444319	445659	-	-0.339336	2.64266	0	0.896058	1	0.125266	2.64266	0	0.963389	1	0.572272	2.64266	0	0.80001	1
GSBRNA2T00130300001	BnaC01g08110D	LK031789	462330	463540	-	-2.8226	-0.181574	-2.59663	0.0121144	0.297504	1.72535	-0.181574	0.959714	0.180386	1	-5.16642	-0.181574	-4.18322	0.00072133	0.006861
GSBRNA2T00130314001	BnaC01g08040D	LK031789	506458	509093	+	0.423307	3.40677	0	0.990588	1	0.276828	3.40677	0	0.998544	1	-0.508679	3.40677	0	0.956543	1
GSBRNA2T00130317001	BnaC01g08020D	LK031789	518050	522232	-	0.552085	4.67942	0	0.991869	1	-0.457489	4.67942	0	0.997396	1	0.441796	4.67942	0	0.996993	1
GSBRNA2T00130318001	BnaC01g08010D	LK031789	523110	523884	-	0.29779	1.2905	0	0.929437	1	-0.280758	1.2905	0	0.934757	1	0.676635	1.2905	0	0.7465	1
GSBRNA2T00130320001	BnaC01g07990D	LK031789	533679	535100	+	0.298439	1.00955	0	0.980988	1	-0.667869	1.00955	0	0.837912	1	-3.56806	1.00955	-3.56432	0.00209445	0.0167193
GSBRNA2T00130327001	BnaC01g07930D	LK031789	576087	576413	-	-0.716284	3.94706	0	0.841842	1	1.02173	3.94706	0.0816425	0.468171	1	-2.85002	3.94706	-3.92448	0.00109258	0.00971362
GSBRNA2T00130328001	BnaC01g07920D	LK031789	584313	585062	-	0.712775	3.69237	0	0.955051	1	0.167659	3.69237	0	0.999962	1	-1.01059	3.69237	-0.0487481	0.480978	1
GSBRNA2T00130331001	BnaC01g07900D	LK031789	591429	592766	+	0.68266	1.1905	0	0.763822	1	0.0462976	1.1905	0	0.995223	1	0.673165	1.1905	0	0.754315	1
GSBRNA2T00130341001	BnaC01g07830D	LK031789	677845	680571	-	0.0640856	0.374899	0	0.995223	1	-1.05885	0.374899	-0.140235	0.445654	1	-5.96187	0.374899	-5.50504	8.19895e-05	0.00121131
GSBRNA2T00130348001	BnaC01g07810D	LK031789	712336	713782	+	-0.430067	3.80524	0	0.945812	1	0.488169	3.80524	0	0.929593	1	2.56016	3.80524	5.90435	4.26697e-05	0.000733123
GSBRNA2T00130349001	BnaC01g07800D	LK031789	715757	718814	-	0.103016	6.15083	0	0.999994	1	-0.215323	6.15083	0	0.999976	1	-0.121036	6.15083	0	0.999991	1
GSBRNA2T00130350001	BnaC01g07790D	LK031789	720199	721529	+	-0.525056	2.2219	0	0.934832	1	0.2328	2.2219	0	0.987175	1	1.81841	2.2219	3.61217	0.00190135	0.0154284
GSBRNA2T00130359001	BnaC01g07710D	LK031789	743625	744223	+	0.955202	6.28456	0	0.629359	1	-0.300166	6.28456	0	0.999903	1	-1.26947	6.28456	-1.80893	0.0483176	0.240409
GSBRNA2T00130360001	BnaC01g07700D	LK031789	744478	745552	+	0.492841	2.89689	0	0.939381	1	0.352836	2.89689	0	0.984619	1	1.7998	2.89689	2.86227	0.0074165	0.0483378
GSBRNA2T00130361001	BnaC01g07690D	LK031789	745722	748069	-	-0.386497	2.62256	0	0.990597	1	-0.154091	2.62256	0	0.997983	1	-2.26839	2.62256	-3.24402	0.00369972	0.0269075
GSBRNA2T00130364001	BnaC01g07660D	LK031789	751696	755175	-	-0.0384029	4.3854	0	0.999947	1	0.0533037	4.3854	0	0.999927	1	-0.207689	4.3854	0	0.999143	1
GSBRNA2T00130367001	BnaC01g07640D	LK031789	756750	761872	-	-0.0351165	3.0261	0	0.999956	1	0.0159899	3.0261	0	0.99998	1	-1.30738	3.0261	-1.20904	0.12545	0.538505
GSBRNA2T00130368001	BnaC01g07630D	LK031789	761938	763425	-	0.410138	0.339808	0	0.892477	1	-0.100385	0.339808	0	0.982726	1	-3.21767	0.339808	-2.45406	0.0158717	0.0934396
GSBRNA2T00130371001	BnaC01g07600D	LK031789	768993	771655	+	0.33077	4.08481	0	0.998852	1	0.167231	4.08481	0	0.999866	1	0.882946	4.08481	0	0.746377	1
GSBRNA2T00130372001	BnaC01g07590D	LK031789	771729	775786	-	0.783497	4.86907	0	0.884463	1	-0.525328	4.86907	0	0.992117	1	0.106797	4.86907	0	0.999801	1
GSBRNA2T00130375001	BnaC01g07580D	LK031789	787887	790894	+	-0.971022	4.95413	0	0.572963	1	-0.0206314	4.95413	0	0.999989	1	-0.316256	4.95413	0	0.999594	1
GSBRNA2T00130377001	BnaC01g07560D	LK031789	796379	799018	+	-0.620808	1.62733	0	0.841649	1	0.144856	1.62733	0	0.981572	1	0.254744	1.62733	0	0.977569	1
GSBRNA2T00130380001	BnaC01g07540D	LK031789	805711	807524	-	0.536053	3.46546	0	0.99445	1	-0.186907	3.46546	0	0.99992	1	-4.01064	3.46546	-6.87296	1.06958e-05	0.00026618
GSBRNA2T00130382001	BnaC01g07520D	LK031789	812818	815972	-	-0.26406	4.89404	0	0.999862	1	-0.124753	4.89404	0	0.999965	1	-0.251279	4.89404	0	0.999835	1
GSBRNA2T00130383001	BnaC01g07510D	LK031789	816702	819165	+	-0.0322134	3.47187	0	0.999986	1	-0.0667292	3.47187	0	0.999967	1	-1.35595	3.47187	-1.62394	0.0657185	0.312746
GSBRNA2T00130384001	BnaC01g07500D	LK031789	819322	822005	-	-0.366709	3.94159	0	0.998733	1	0.254253	3.94159	0	0.999584	1	0.487581	3.94159	0	0.996289	1
GSBRNA2T00130385001	BnaC01g07490D	LK031789	822259	824000	-	-0.468775	2.07752	0	0.94497	1	0.616854	2.07752	0	0.887164	1	0.558095	2.07752	0	0.929286	1
GSBRNA2T00130390001	BnaC01g07450D	LK031789	848076	850066	+	0.0808478	6.79704	0	0.999999	1	-0.402985	6.79704	0	0.999914	1	1.17187	6.79704	1.59906	0.0684397	0.323954
GSBRNA2T00130395001	BnaC01g07430D	LK031789	892611	895039	-	0.0347114	1.17631	0	0.991601	1	-0.215392	1.17631	0	0.941667	1	3.14045	1.17631	5.51068	7.79678e-05	0.00116433
GSBRNA2T00130397001	BnaC01g07420D	LK031789	900252	902388	+	-0.736505	2.20366	0	0.767542	1	0.784379	2.20366	0	0.727385	1	-0.338099	2.20366	0	0.957855	1
GSBRNA2T00130401001	BnaC01g07390D	LK031789	904454	906433	+	-0.208213	1.8214	0	0.976757	1	-0.447231	1.8214	0	0.896627	1	0.872823	1.8214	0	0.643846	1
GSBRNA2T00130402001	BnaC01g07380D	LK031789	906740	908081	+	-0.166371	4.30251	0	0.999964	1	-0.249567	4.30251	0	0.999874	1	-0.353171	4.30251	0	0.999426	1
GSBRNA2T00130404001	BnaC01g07360D	LK031789	912094	913666	-	0.151273	0.675542	0	0.965311	1	0.0948122	0.675542	0	0.981047	1	-1.708	0.675542	-0.98168	0.174695	0.707476
GSBRNA2T00130414001	BnaC01g07300D	LK031789	969774	971211	-	-0.24509	3.76568	0	0.999416	1	0.0998508	3.76568	0	0.999861	1	0.734519	3.76568	0	0.930746	1
GSBRNA2T00130415001	BnaC01g07290D	LK031789	974245	976481	+	-0.80442	3.54305	0	0.837039	1	-0.144732	3.54305	0	0.999234	1	-1.69371	3.54305	-2.78755	0.00849905	0.0545102
GSBRNA2T00130417001	BnaC01g07280D	LK031789	978255	980401	-	-0.116413	5.13934	0	0.999943	1	-0.31109	5.13934	0	0.999422	1	0.0616779	5.13934	0	0.99997	1
GSBRNA2T00130418001	BnaC01g07270D	LK031789	980714	983493	+	-0.109813	5.70153	0	0.999986	1	0.267089	5.70153	0	0.999918	1	0.268352	5.70153	0	0.999908	1
GSBRNA2T00130420001	BnaC01g07250D	LK031789	986574	993622	+	-0.418235	3.18918	0	0.990762	1	0.257777	3.18918	0	0.997415	1	-0.040029	3.18918	0	0.999787	1
GSBRNA2T00130421001	BnaC01g07240D	LK031789	993891	995341	-	0.198828	0.895947	0	0.950663	1	-1.08632	0.895947	-0.151981	0.442621	1	2.3449	0.895947	3.28776	0.0034176	0.0251633
GSBRNA2T00130425001	BnaC01g07220D	LK031789	1006612	1009110	+	-0.701043	0.858512	0	0.687562	1	0.585942	0.858512	0	0.749633	1	1.73394	0.858512	1.52961	0.0766188	0.356791
GSBRNA2T00130426001	BnaC01g07210D	LK031789	1010672	1013196	+	0.140293	3.88901	0	0.999082	1	0.408206	3.88901	0	0.993233	1	1.46939	3.88901	2.34016	0.0191045	0.109655
GSBRNA2T00130431001	BnaC01g07180D	LK031789	1032864	1037333	+	0.064695	5.86958	0	0.999997	1	-0.0112628	5.86958	0	1	1	1.21605	5.86958	1.77579	0.0510919	0.252171
GSBRNA2T00130434001	BnaC01g07150D	LK031789	1039519	1042418	+	-0.357642	4.16535	0	0.998542	1	0.191895	4.16535	0	0.999701	1	0.28461	4.16535	0	0.999388	1
GSBRNA2T00130435001	BnaC01g07140D	LK031789	1042802	1044551	+	0.0441847	3.21899	0	0.99992	1	-0.641331	3.21899	0	0.946964	1	-1.05848	3.21899	-0.235674	0.408915	1
GSBRNA2T00130439001	BnaC01g07110D	LK031789	1063720	1067530	+	0.14406	2.97784	0	0.996388	1	-0.179681	2.97784	0	0.994856	1	0.436771	2.97784	0	0.966653	1
GSBRNA2T00130440001	BnaC01g07100D	LK031789	1068443	1069849	+	0.544759	3.7746	0	0.982715	1	0.0399538	3.7746	0	0.999958	1	0.349	3.7746	0	0.995687	1
GSBRNA2T00130441001	BnaC01g07090D	LK031789	1070818	1072735	-	0.0261288	4.33339	0	0.999993	1	-0.243967	4.33339	0	0.999816	1	0.133384	4.33339	0	0.999935	1
GSBRNA2T00130442001	BnaC01g07080D	LK031789	1074744	1078233	+	0.539084	4.29022	0	0.994117	1	-0.154379	4.29022	0	0.999947	1	0.234861	4.29022	0	0.999655	1
GSBRNA2T00130443001	BnaC01g07070D	LK031789	1078861	1081628	+	0.348897	2.41163	0	0.98433	1	0.0385829	2.41163	0	0.999469	1	-0.154956	2.41163	0	0.991266	1
GSBRNA2T00130445001	BnaC01g07050D	LK031789	1082848	1084097	+	0.191778	2.498	0	0.995015	1	0.147598	2.498	0	0.997501	1	-0.475733	2.498	0	0.930409	1
GSBRNA2T00130451001	BnaC01g07000D	LK031789	1104348	1105340	+	-0.0609236	3.02135	0	0.99923	1	0.362408	3.02135	0	0.989934	1	0.036422	3.02135	0	0.999336	1
GSBRNA2T00130461001	BnaC01g06910D	LK031789	1121490	1123808	-	0.789102	3.01135	0	0.818728	1	-0.364272	3.01135	0	0.994894	1	-0.406119	3.01135	0	0.969117	1
GSBRNA2T00130462001	BnaC01g06900D	LK031789	1126557	1128147	-	0.575826	4.34568	0	0.992644	1	-1.00899	4.34568	-0.0586765	0.477108	1	-2.08626	4.34568	-4.76946	0.00025627	0.00298038
GSBRNA2T00130466001	BnaC01g06880D	LK031789	1142661	1152331	+	0.158862	4.99466	0	0.999973	1	0.0269013	4.99466	0	0.999997	1	-0.433591	4.99466	0	0.998658	1
GSBRNA2T00130467001	BnaC01g06870D	LK031789	1153690	1159906	-	-0.195919	4.38322	0	0.999627	1	-0.0860468	4.38322	0	0.999876	1	-1.94769	4.38322	-3.82181	0.00130792	0.0112571
GSBRNA2T00130476001	BnaC01g06830D	LK031789	1188159	1190164	+	1.7806	4.50976	4.23621	0.000632628	0.0256107	0.0322939	4.50976	0	0.999972	1	-5.52876	4.50976	-6.33239	2.33833e-05	0.000466905
GSBRNA2T00130480001	BnaC01g06800D	LK031789	1200081	1202842	-	0.669798	3.93484	0	0.960371	1	-0.271587	3.93484	0	0.999588	1	0.317648	3.93484	0	0.998155	1
GSBRNA2T00130481001	BnaC01g06790D	LK031789	1204555	1206099	-	-0.147065	5.2447	0	0.999687	1	0.391806	5.2447	0	0.996799	1	0.342792	5.2447	0	0.997847	1
GSBRNA2T00130486001	BnaC01g06760D	LK031789	1214823	1217145	-	0.127742	4.57577	0	0.999765	1	0.100288	4.57577	0	0.999851	1	-0.51941	4.57577	0	0.980037	1
GSBRNA2T00130489001	BnaC01g06730D	LK031789	1236836	1237385	+	0.0977715	1.59996	0	0.994607	1	0.111069	1.59996	0	0.994595	1	-5.27965	1.59996	-4.08765	0.000856047	0.0079543
GSBRNA2T00130490001	BnaC01g06720D	LK031789	1238892	1240976	+	-0.238563	3.74058	0	0.998666	1	0.404001	3.74058	0	0.994587	1	0.0270184	3.74058	0	0.999898	1
GSBRNA2T00130491001	BnaC01g06710D	LK031789	1241200	1243890	-	0.450712	3.77437	0	0.989336	1	0.152586	3.77437	0	0.999599	1	0.968053	3.77437	0	0.5603	1
GSBRNA2T00130492001	BnaC01g06700D	LK031789	1248946	1251513	+	1.40893	2.39823	1.4441	0.0876894	1	0.168078	2.39823	0	0.999091	1	0.633956	2.39823	0	0.855584	1
GSBRNA2T00130494001	BnaC01g06690D	LK031789	1255168	1256827	+	-0.733573	2.79435	0	0.820581	1	0.703275	2.79435	0	0.845035	1	-0.0932542	2.79435	0	0.997801	1
GSBRNA2T00130498001	BnaC01g06660D	LK031789	1266757	1268215	+	-1.67427	1.6288	-0.701707	0.256971	1	0.96972	1.6288	0	0.553161	1	2.46548	1.6288	2.63616	0.0112215	0.0691544
GSBRNA2T00130502001	BnaC01g06630D	LK031789	1277690	1281031	-	-1.35791	3.59098	-2.26688	0.0217766	0.484207	-0.290281	3.59098	0	0.998736	1	-1.82995	3.59098	-4.33759	0.000531267	0.00537929
GSBRNA2T00130510001	BnaC01g06600D	LK031789	1305366	1306301	+	-0.594474	3.06088	0	0.914101	1	-0.00794497	3.06088	0	0.999714	1	-2.23391	3.06088	-2.7366	0.00933283	0.0589568
GSBRNA2T00130516001	BnaC01g06550D	LK031789	1322060	1324393	-	0.0867157	4.06921	0	0.999977	1	-0.370032	4.06921	0	0.99925	1	-0.738009	4.06921	0	0.917701	1
GSBRNA2T00130517001	BnaC01g06540D	LK031789	1328255	1332037	-	-0.120578	4.61379	0	0.999917	1	-0.424526	4.61379	0	0.99735	1	-2.48191	4.61379	-6.07857	3.29235e-05	0.000606494
GSBRNA2T00130519001	BnaC01g06520D	LK031789	1343882	1345123	-	7.32778	-0.596749	8.86015	9.32408e-07	0.000125226	-0.220697	-0.596749	0	0.997966	1	0.471997	-0.596749	0	0.779951	1
GSBRNA2T00130521001	BnaC01g06500D	LK031789	1359104	1361726	-	7.05902	-0.910554	6.95524	1.00724e-05	0.000738844	-0.91613	-0.910554	0	0.597766	1	0.471997	-0.910554	0	0.788211	1
GSBRNA2T00130525001	BnaC01g06470D	LK031789	1377323	1382441	+	8.71143	0.33716	10.7992	1.23105e-07	3.9472e-05	0.749208	0.33716	0	0.942509	1	0.471997	0.33716	0	0.780116	1
GSBRNA2T00130526001	BnaC01g06460D	LK031789	1382707	1386003	-	4.41679	2.90368	8.07403	2.25833e-06	0.000230246	0.29011	2.90368	0	0.999519	1	1.25543	2.90368	0.494367	0.31568	1
GSBRNA2T00130527001	BnaC01g06450D	LK031789	1386138	1389370	-	7.31972	-0.624047	9.90563	2.95632e-07	6.70826e-05	-0.309007	-0.624047	0	0.99755	1	0.471997	-0.624047	0	0.780531	1
GSBRNA2T00130529001	BnaC01g06430D	LK031789	1395874	1397038	+	7.13982	4.14538	19.2203	2.1782e-10	9.6381e-06	-0.430563	4.14538	0	0.999779	1	-0.28859	4.14538	0	0.923857	1
GSBRNA2T00130530001	BnaC01g06420D	LK031789	1399926	1402376	+	8.07285	-0.261105	10.5053	1.62389e-07	4.67621e-05	-0.384263	-0.261105	0	0.99783	1	0.471997	-0.261105	0	0.779675	1
GSBRNA2T00130531001	BnaC01g06410D	LK031789	1403061	1405381	+	9.2568	1.16549	10.3734	1.90503e-07	5.0911e-05	-0.201606	1.16549	0	0.999904	1	0.471997	1.16549	0	0.783916	1
GSBRNA2T00130532001	BnaC01g06400D	LK031789	1405895	1410638	+	7.91169	-0.213689	11.0248	9.71567e-08	3.4119e-05	0.143575	-0.213689	0	0.999918	1	0.471997	-0.213689	0	0.780842	1
GSBRNA2T00130533001	BnaC01g06390D	LK031789	1410900	1413983	+	8.19145	1.12999	8.01727	2.59897e-06	0.000259008	0.198433	1.12999	0	0.999743	1	-1.11297	1.12999	-0.0898611	0.524825	1
GSBRNA2T00130534001	BnaC01g06380D	LK031789	1414051	1416960	-	6.80372	-0.881707	7.03029	9.04052e-06	0.000673443	-0.328367	-0.881707	0	0.977971	1	0.471997	-0.881707	0	0.784668	1
GSBRNA2T00130538001	BnaC01g06350D	LK031789	1422906	1425679	-	1.67426	2.62867	2.88794	0.00707692	0.193655	0.320897	2.62867	0	0.999233	1	-0.582284	2.62867	0	0.872488	1
GSBRNA2T00130539001	BnaC01g06340D	LK031789	1426094	1428407	-	-0.171939	4.88232	0	0.999979	1	0.257952	4.88232	0	0.999945	1	0.680492	4.88232	0	0.985887	1
GSBRNA2T00130541001	BnaC01g06320D	LK031789	1429933	1431258	-	0.125749	5.28885	0	0.999264	1	-0.349374	5.28885	0	0.994113	1	0.15006	5.28885	0	0.998876	1
GSBRNA2T00130543001	BnaC01g06300D	LK031789	1432762	1436848	+	1.10871	4.68932	0.601789	0.279491	1	-0.310584	4.68932	0	0.999179	1	-0.00428435	4.68932	0	0.999985	1
GSBRNA2T00130544001	BnaC01g06290D	LK031789	1436909	1442307	-	-0.204677	5.51368	0	0.999946	1	0.00484611	5.51368	0	0.999999	1	0.241219	5.51368	0	0.999917	1
GSBRNA2T00130545001	BnaC01g06280D	LK031789	1443081	1446059	+	2.04654	4.10649	5.9515	3.97533e-05	0.00237703	0.177202	4.10649	0	0.999966	1	-0.257671	4.10649	0	0.995946	1
GSBRNA2T00130546001	BnaC01g06270D	LK031789	1446551	1447673	+	-1.24027	2.77182	-0.938441	0.183648	1	0.545113	2.77182	0	0.937277	1	0.81999	2.77182	0	0.811381	1
GSBRNA2T00130547001	BnaC01g06260D	LK031789	1449273	1451670	+	0.544375	4.10778	0	0.994799	1	-0.351981	4.10778	0	0.999569	1	0.272352	4.10778	0	0.999605	1
GSBRNA2T00130548001	BnaC01g06250D	LK031789	1451744	1452989	-	1.34205	2.43468	1.29	0.111184	1	-0.0210302	2.43468	0	0.999921	1	-0.199918	2.43468	0	0.979985	1
GSBRNA2T00130552001	BnaC01g06220D	LK031789	1477122	1479695	+	0.436379	6.95084	0	0.999789	1	-0.0848923	6.95084	0	0.999998	1	-0.229066	6.95084	0	0.999983	1
GSBRNA2T00130554001	BnaC01g06200D	LK031789	1487334	1488882	+	0.685665	2.16945	0	0.876074	1	-0.300975	2.16945	0	0.993414	1	0.236374	2.16945	0	0.987924	1
GSBRNA2T00130556001	BnaC01g06190D	LK031789	1495619	1499800	+	0.858864	3.03402	0	0.718974	1	-0.745119	3.03402	0	0.853901	1	-1.67674	3.03402	-1.65387	0.0625884	0.300012
GSBRNA2T00130559001	BnaC01g06170D	LK031789	1510794	1513920	+	0.642658	5.59321	0	0.993378	1	0.238174	5.59321	0	0.99998	1	-0.935168	5.59321	0	0.673931	1
GSBRNA2T00130560001	BnaC01g06160D	LK031789	1514109	1515877	-	5.82185	-0.0483746	5.81562	5.06164e-05	0.00293536	0.231178	-0.0483746	0	0.996711	1	-1.11297	-0.0483746	-0.0984265	0.507405	1
GSBRNA2T00130562001	BnaC01g06150D	LK031789	1519075	1522023	+	-0.0851871	4.67978	0	0.999991	1	-0.122916	4.67978	0	0.999983	1	-0.952339	4.67978	0	0.618034	1
GSBRNA2T00130564001	BnaC01g06130D	LK031789	1526780	1528279	+	-0.222555	6.31	0	0.999988	1	0.264129	6.31	0	0.999979	1	0.111396	6.31	0	0.999997	1
GSBRNA2T00130565001	BnaC01g06120D	LK031789	1529478	1531351	+	1.24443	4.20587	1.69324	0.058636	1	-0.0452962	4.20587	0	0.999997	1	-0.97586	4.20587	0	0.546603	1
GSBRNA2T00130568001	BnaC01g06090D	LK031789	1535577	1541153	-	0.00446228	8.12964	0	1	1	-0.253839	8.12964	0	0.999982	1	-1.34156	8.12964	-2.87577	0.00723578	0.0473203
GSBRNA2T00130569001	BnaC01g06080D	LK031789	1541521	1546080	-	1.08532	4.60327	0.559633	0.293228	1	-0.0455588	4.60327	0	0.999993	1	-0.392472	4.60327	0	0.996675	1
GSBRNA2T00130571001	BnaC01g06060D	LK031789	1552447	1554815	+	0.479508	3.09945	0	0.983908	1	-0.202377	3.09945	0	0.998928	1	-0.314559	3.09945	0	0.988855	1
GSBRNA2T00130572001	BnaC01g06050D	LK031789	1556017	1557651	+	-0.0739559	1.53608	0	0.992627	1	0.24024	1.53608	0	0.97432	1	0.341179	1.53608	0	0.948067	1
GSBRNA2T00130573001	BnaC01g06040D	LK031789	1558172	1560784	-	-0.582428	1.86269	0	0.940816	1	-0.297004	1.86269	0	0.98547	1	-1.54624	1.86269	-1.56771	0.0720134	0.338192
GSBRNA2T00130574001	BnaC01g06030D	LK031789	1564996	1566318	-	-0.154159	3.98559	0	0.999029	1	0.288914	3.98559	0	0.997102	1	0.793333	3.98559	0	0.833545	1
GSBRNA2T00130577001	BnaC01g06000D	LK031789	1575365	1578499	-	-0.418292	4.6807	0	0.999207	1	0.508897	4.6807	0	0.997625	1	-0.210663	4.6807	0	0.99991	1
GSBRNA2T00130578001	BnaC01g05990D	LK031789	1578697	1580783	-	-0.0348992	4.36423	0	0.999978	1	0.130515	4.36423	0	0.999905	1	0.11829	4.36423	0	0.999879	1
GSBRNA2T00130581001	BnaC01g05960D	LK031789	1585601	1589170	-	-0.0690183	3.18666	0	0.999736	1	-0.647436	3.18666	0	0.925963	1	-1.41419	3.18666	-1.4206	0.0909776	0.411613
GSBRNA2T00130585001	BnaC01g05930D	LK031789	1615591	1621187	+	0.108748	5.21626	0	0.999983	1	-0.233225	5.21626	0	0.999923	1	0.458654	5.21626	0	0.998828	1
GSBRNA2T00130586001	BnaC01g05920D	LK031789	1624428	1626750	+	0.165291	2.21793	0	0.996535	1	0.350273	2.21793	0	0.990534	1	0.658179	2.21793	0	0.893172	1
GSBRNA2T00130590001	BnaC01g05880D	LK031789	1634416	1636716	+	0.999316	4.25594	0	0.50127	1	-0.599734	4.25594	0	0.965238	1	0.340844	4.25594	0	0.99219	1
GSBRNA2T00130591001	BnaC01g05870D	LK031789	1636792	1638085	-	0.169763	1.98366	0	0.992974	1	0.454651	1.98366	0	0.967731	1	0.0364182	1.98366	0	0.99774	1
GSBRNA2T00130592001	BnaC01g05860D	LK031789	1639519	1641216	-	0.0548745	5.71034	0	0.999987	1	-0.0223496	5.71034	0	0.999995	1	0.308855	5.71034	0	0.999692	1
GSBRNA2T00130596001	BnaC01g05820D	LK031789	1662343	1670166	+	0.190921	6.44066	0	0.999993	1	0.00484395	6.44066	0	1	1	-0.202563	6.44066	0	0.999989	1
GSBRNA2T00130597001	BnaC01g05810D	LK031789	1670713	1674418	-	0.394618	1.58822	0	0.935176	1	0.790773	1.58822	0	0.73985	1	-3.55741	1.58822	-2.78683	0.00869547	0.0556088
GSBRNA2T00130598001	BnaC01g05800D	LK031789	1676702	1679672	+	0.480771	4.38353	0	0.997039	1	-0.0772888	4.38353	0	0.99998	1	0.465921	4.38353	0	0.996687	1
GSBRNA2T00130604001	BnaC01g05740D	LK031789	1689490	1691122	+	0.66608	2.81752	0	0.85044	1	0.048873	2.81752	0	0.998921	1	0.980664	2.81752	0	0.524037	1
GSBRNA2T00130606001	BnaC01g05720D	LK031789	1691685	1702642	+	-0.481812	2.60461	0	0.967882	1	-0.131715	2.60461	0	0.996341	1	-0.250167	2.60461	0	0.992311	1
GSBRNA2T00130607001	BnaC01g05710D	LK031789	1703273	1706692	+	0.842616	2.56877	0	0.725829	1	-0.136671	2.56877	0	0.998857	1	-1.51257	2.56877	-1.18007	0.130945	0.557825
GSBRNA2T00130611001	BnaC01g05670D	LK031789	1716658	1719168	+	0.566701	5.86573	0	0.996077	1	0.0558346	5.86573	0	0.999995	1	0.303781	5.86573	0	0.999828	1
GSBRNA2T00130612001	BnaC01g05660D	LK031789	1720555	1724800	+	0.0105285	2.73978	0	0.99993	1	0.0364023	2.73978	0	0.999773	1	0.0445709	2.73978	0	0.999499	1
GSBRNA2T00130614001	BnaC01g05650D	LK031789	1732108	1736731	+	0.263599	5.46491	0	0.99896	1	-0.126612	5.46491	0	0.99975	1	-0.27894	5.46491	0	0.998234	1
GSBRNA2T00130616001	BnaC01g05630D	LK031789	1744687	1748290	+	-0.0422481	4.33116	0	0.999997	1	-0.272422	4.33116	0	0.999924	1	-2.6003	4.33116	-7.58092	4.15961e-06	0.000139859
GSBRNA2T00130617001	BnaC01g05620D	LK031789	1754344	1755042	+	0.0173699	1.35962	0	0.999267	1	-0.486924	1.35962	0	0.925193	1	-0.0500575	1.35962	0	0.996474	1
GSBRNA2T00130624001	BnaC01g05600D	LK031789	1781157	1793192	+	-0.579636	4.66683	0	0.992903	1	0.535889	4.66683	0	0.995877	1	-5.93985	4.66683	-10.5881	1.43382e-07	1.49985e-05
GSBRNA2T00130625001	BnaC01g05590D	LK031789	1793484	1803243	-	0.186971	4.84796	0	0.999902	1	-0.114872	4.84796	0	0.999959	1	-0.189893	4.84796	0	0.999818	1
GSBRNA2T00130626001	BnaC01g05580D	LK031789	1804921	1806716	+	-0.852495	2.64167	0	0.669132	1	0.521037	2.64167	0	0.90796	1	-0.227963	2.64167	0	0.984432	1
GSBRNA2T00130627001	BnaC01g05570D	LK031789	1806974	1810237	-	-0.438038	5.15483	0	0.985559	1	0.343118	5.15483	0	0.993198	1	-0.354833	5.15483	0	0.991397	1
GSBRNA2T00130628001	BnaC01g05560D	LK031789	1813223	1818332	+	0.255524	6.48745	0	0.999981	1	-0.183435	6.48745	0	0.999992	1	-0.145964	6.48745	0	0.999994	1
GSBRNA2T00130630001	BnaC01g05540D	LK031789	1819779	1820357	-	0.779533	0.495065	0	0.713498	1	-0.631063	0.495065	0	0.83423	1	-4.4482	0.495065	-3.9116	0.00114401	0.0100938
GSBRNA2T00130633001	BnaC01g05520D	LK031789	1826732	1827881	-	0.199644	4.4148	0	0.999816	1	0.0188331	4.4148	0	0.999991	1	-2.67086	4.4148	-6.00258	3.68529e-05	0.000657037
GSBRNA2T00130637001	BnaC01g05490D	LK031789	1844041	1844741	-	-0.257769	2.70663	0	0.987487	1	0.332097	2.70663	0	0.980424	1	0.363369	2.70663	0	0.977282	1
GSBRNA2T00130638001	BnaC01g05480D	LK031789	1845405	1846156	-	0.287295	1.06548	0	0.960983	1	-0.0905634	1.06548	0	0.991664	1	0.218893	1.06548	0	0.964189	1
GSBRNA2T00130640001	BnaC01g05460D	LK031789	1848547	1849396	-	0.05202	4.64031	0	0.999969	1	0.398327	4.64031	0	0.998624	1	0.114803	4.64031	0	0.999887	1
GSBRNA2T00130641001	BnaC01g05450D	LK031789	1850983	1852112	+	-0.311444	0.965524	0	0.964774	1	-0.668525	0.965524	0	0.781953	1	-0.191687	0.965524	0	0.977581	1
GSBRNA2T00130646001	BnaC01g05410D	LK031789	1890540	1893275	+	0.69817	3.30332	0	0.944282	1	-0.436456	3.30332	0	0.996989	1	-0.0427243	3.30332	0	0.999839	1
GSBRNA2T00130657001	BnaC01g05360D	LK031789	1981123	1982085	-	0.142645	3.92305	0	0.999873	1	0.00937251	3.92305	0	0.999995	1	0.639259	3.92305	0	0.973915	1
GSBRNA2T00130660001	BnaC01g05340D	LK031789	2003351	2005351	-	-2.72323	0.706	-2.87114	0.0073246	0.198956	-0.0215772	0.706	0	0.990646	1	0.572147	0.706	0	0.88616	1
GSBRNA2T00130661001	BnaC01g05330D	LK031789	2005719	2009592	+	-0.0466116	6.11125	0	0.999998	1	-0.073232	6.11125	0	0.999996	1	-0.266463	6.11125	0	0.999947	1
GSBRNA2T00130662001	BnaC01g05320D	LK031789	2009881	2017171	-	-0.0691505	3.45329	0	0.999111	1	-0.231169	3.45329	0	0.994612	1	0.0652087	3.45329	0	0.998854	1
GSBRNA2T00130663001	BnaC01g05310D	LK031789	2021271	2022850	+	-0.193355	2.25665	0	0.992883	1	0.487994	2.25665	0	0.957285	1	0.0231501	2.25665	0	0.999125	1
GSBRNA2T00130664001	BnaC01g05300D	LK031789	2022900	2025616	-	1.02649	7.54813	0.114109	0.45556	1	-0.966941	7.54813	0	0.555496	1	3.53653	7.54813	11.2419	7.43365e-08	1.0113e-05
GSBRNA2T00130673001	BnaC01g05240D	LK031789	2078907	2080786	+	-0.636662	2.3964	0	0.903562	1	0.695173	2.3964	0	0.867188	1	0.957144	2.3964	0	0.575595	1
GSBRNA2T00130674001	BnaC01g05230D	LK031789	2083021	2087529	-	0.115735	7.45588	0	0.999999	1	-0.249312	7.45588	0	0.999992	1	-0.989841	7.45588	0	0.536237	1
GSBRNA2T00130677001	BnaC01g05200D	LK031789	2099444	2102178	+	-0.332422	2.79767	0	0.991995	1	0.0969813	2.79767	0	0.998773	1	-0.238379	2.79767	0	0.994345	1
GSBRNA2T00130678001	BnaC01g05190D	LK031789	2105299	2105899	-	2.5555	4.3778	6.58409	1.58864e-05	0.00108311	-1.54654	4.3778	-2.75706	0.00898455	0.86717	1.84343	4.3778	3.41114	0.00273129	0.0208941
GSBRNA2T00130679001	BnaC01g05180D	LK031789	2109295	2111848	-	-0.216959	1.74073	0	0.936167	1	0.931797	1.74073	0	0.555879	1	4.21125	1.74073	8.24707	1.8257e-06	7.7231e-05
GSBRNA2T00130680001	BnaC01g05170D	LK031789	2112454	2115856	+	-0.0336976	3.73988	0	0.999985	1	-0.259365	3.73988	0	0.9996	1	0.184049	3.73988	0	0.999816	1
GSBRNA2T00130681001	BnaC01g05160D	LK031789	2117553	2122524	+	-0.439187	5.62404	0	0.998826	1	0.218824	5.62404	0	0.999905	1	-0.920068	5.62404	0	0.693968	1
GSBRNA2T00130682001	BnaC01g05150D	LK031789	2122734	2127252	-	-0.2437	6.60599	0	0.999985	1	0.242221	6.60599	0	0.999985	1	0.735714	6.60599	0	0.980661	1
GSBRNA2T00130684001	BnaC01g05130D	LK031789	2133957	2136557	-	-0.0394005	0.740574	0	0.996792	1	-0.659462	0.740574	0	0.79507	1	-3.17417	0.740574	-2.98339	0.00600142	0.0405669
GSBRNA2T00130687001	BnaC01g05110D	LK031789	2143369	2145022	-	0.100071	1.1071	0	0.994082	1	0.173889	1.1071	0	0.990896	1	-2.95155	1.1071	-2.95512	0.00629832	0.0422831
GSBRNA2T00130688001	BnaC01g05100D	LK031789	2145874	2148212	+	0.187478	2.94806	0	0.998442	1	0.116295	2.94806	0	0.999446	1	-0.068533	2.94806	0	0.999098	1
GSBRNA2T00130696001	BnaC01g05030D	LK031789	2164719	2171106	-	0.807507	6.51792	0	0.878518	1	0.515689	6.51792	0	0.996219	1	2.37375	6.51792	8.97509	7.73892e-07	4.18621e-05
GSBRNA2T00130697001	BnaC01g05020D	LK031789	2176888	2178123	+	-0.487961	0.966113	0	0.916278	1	-0.0243044	0.966113	0	0.997371	1	-1.69268	0.966113	-1.40968	0.0926202	0.417551
GSBRNA2T00130700001	BnaC01g04990D	LK031789	2181698	2183715	+	0.0234844	2.56027	0	0.999237	1	0.261233	2.56027	0	0.989825	1	0.814686	2.56027	0	0.739874	1
GSBRNA2T00130701001	BnaC01g04980D	LK031789	2188902	2194380	-	0.149049	1.87912	0	0.989566	1	-0.448165	1.87912	0	0.928306	1	0.565944	1.87912	0	0.887777	1
GSBRNA2T00130702001	BnaC01g04970D	LK031789	2195543	2201027	-	0.274596	5.71611	0	0.999832	1	-0.405166	5.71611	0	0.999198	1	-0.27173	5.71611	0	0.999762	1
GSBRNA2T00130704001	BnaC01g04950D	LK031789	2208152	2215791	-	1.04036	5.14642	0.24993	0.403523	1	-0.394911	5.14642	0	0.998889	1	0.468497	5.14642	0	0.9953	1
GSBRNA2T00130705001	BnaC01g04940D	LK031789	2216625	2218302	-	-0.203426	4.31493	0	0.999816	1	0.215871	4.31493	0	0.999795	1	0.180858	4.31493	0	0.999838	1
GSBRNA2T00130706001	BnaC01g04930D	LK031789	2218369	2221903	-	-0.505314	4.25743	0	0.968494	1	0.318282	4.25743	0	0.991777	1	-0.558402	4.25743	0	0.942705	1
GSBRNA2T00130713001	BnaC01g04880D	LK031789	2230098	2231450	+	-0.404104	1.49254	0	0.9276	1	0.309063	1.49254	0	0.950768	1	0.00647545	1.49254	0	0.999223	1
GSBRNA2T00130714001	BnaC01g04870D	LK031789	2232313	2232671	-	-0.307627	3.10505	0	0.982397	1	-0.393085	3.10505	0	0.956992	1	1.10271	3.10505	0.395428	0.349881	1
GSBRNA2T00130715001	BnaC01g04860D	LK031789	2232743	2236623	-	-0.0122786	6.09117	0	0.99973	1	-0.788667	6.09117	0	0.766453	1	1.33454	6.09117	1.25821	0.116622	0.506557
GSBRNA2T00130716001	BnaC01g04850D	LK031789	2238846	2242746	-	0.567044	2.16499	0	0.981503	1	0.125807	2.16499	0	0.99989	1	-5.48466	2.16499	-6.4152	2.07369e-05	0.000424015
GSBRNA2T00130717001	BnaC01g04840D	LK031789	2244649	2247059	-	-0.399281	1.43924	0	0.935038	1	0.171531	1.43924	0	0.97856	1	0.278792	1.43924	0	0.967668	1
GSBRNA2T00130718001	BnaC01g04830D	LK031789	2247353	2249342	+	0.00772554	4.09973	0	0.999996	1	-0.0576154	4.09973	0	0.999966	1	-0.446033	4.09973	0	0.99429	1
GSBRNA2T00130721001	BnaC01g04810D	LK031789	2253178	2255542	-	-0.684507	1.77338	0	0.822615	1	0.392017	1.77338	0	0.951388	1	-1.52717	1.77338	-1.18155	0.130672	0.556897
GSBRNA2T00130723001	BnaC01g04790D	LK031789	2260636	2262527	+	-0.374936	3.68302	0	0.992682	1	0.496058	3.68302	0	0.980861	1	-2.4099	3.68302	-3.83954	0.00126792	0.0109683
GSBRNA2T00130724001	BnaC01g04780D	LK031789	2262628	2265954	-	0.4548	5.54545	0	0.999086	1	-0.21819	5.54545	0	0.999954	1	-0.0137282	5.54545	0	0.999998	1
GSBRNA2T00130725001	BnaC01g04770D	LK031789	2267521	2270327	+	-0.272401	1.13306	0	0.965377	1	0.0148448	1.13306	0	0.998276	1	-1.11384	1.13306	-0.235661	0.409416	1
GSBRNA2T00130726001	BnaC01g04760D	LK031789	2272136	2273041	-	0.486655	1.10819	0	0.931977	1	0.206074	1.10819	0	0.992489	1	-3.62119	1.10819	-3.38749	0.00288922	0.0219246
GSBRNA2T00130727001	BnaC01g04750D	LK031789	2275740	2277478	-	-0.127953	1.48322	0	0.976465	1	0.492401	1.48322	0	0.878104	1	1.29991	1.48322	0.777161	0.22641	0.871222
GSBRNA2T00130730001	BnaC01g04720D	LK031789	2281989	2284454	-	0.0221712	2.68664	0	0.999683	1	-0.024422	2.68664	0	0.999648	1	0.860676	2.68664	0	0.712581	1
GSBRNA2T00130731001	BnaC01g04710D	LK031789	2285791	2287871	-	0.134377	4.37248	0	0.99951	1	0.0401158	4.37248	0	0.999896	1	0.422282	4.37248	0	0.99202	1
GSBRNA2T00130732001	BnaC01g04700D	LK031789	2288307	2289545	-	0.169885	2.26221	0	0.988429	1	-0.117117	2.26221	0	0.992804	1	0.585823	2.26221	0	0.880505	1
GSBRNA2T00130733001	BnaC01g04690D	LK031789	2290146	2293803	-	0.293444	3.02214	0	0.997101	1	-0.384669	3.02214	0	0.99301	1	-0.286607	3.02214	0	0.992885	1
GSBRNA2T00130734001	BnaC01g04680D	LK031789	2296891	2299709	+	0.293852	5.11668	0	0.999843	1	-0.136078	5.11668	0	0.999977	1	0.857382	5.11668	0	0.837184	1
GSBRNA2T00130735001	BnaC01g04670D	LK031789	2300188	2305502	+	-0.322581	4.49105	0	0.999735	1	0.0216557	4.49105	0	0.999996	1	-0.269218	4.49105	0	0.999786	1
GSBRNA2T00130736001	BnaC01g04660D	LK031789	2305557	2309387	-	0.0450493	4.81503	0	0.999961	1	-0.538503	4.81503	0	0.988165	1	-0.772312	4.81503	0	0.868917	1
GSBRNA2T00130737001	BnaC01g04650D	LK031789	2309777	2312738	+	-0.0521858	5.10779	0	0.999994	1	0.0185329	5.10779	0	0.999998	1	1.84729	5.10779	6.61384	1.52327e-05	0.000337717
GSBRNA2T00130738001	BnaC01g04640D	LK031789	2314988	2317019	+	0.424411	1.66158	0	0.94972	1	-0.614907	1.66158	0	0.864052	1	-0.0187229	1.66158	0	0.997969	1
GSBRNA2T00130741001	BnaC01g04620D	LK031789	2326094	2331425	+	0.0302859	2.05279	0	0.999352	1	-0.324612	2.05279	0	0.982661	1	-0.126627	2.05279	0	0.994332	1
GSBRNA2T00130742001	BnaC01g04610D	LK031789	2331552	2333123	-	0.68387	2.51853	0	0.877571	1	-0.864923	2.51853	0	0.688625	1	-0.496003	2.51853	0	0.917271	1
GSBRNA2T00130743001	BnaC01g04600D	LK031789	2333561	2334235	-	-0.510438	4.51588	0	0.996058	1	0.685576	4.51588	0	0.970272	1	1.08292	4.51588	0.598924	0.280413	1
GSBRNA2T00130744001	BnaC01g04590D	LK031789	2334675	2340036	+	0.0467218	5.66909	0	0.999997	1	-0.209681	5.66909	0	0.999969	1	-0.140035	5.66909	0	0.999983	1
GSBRNA2T00130747001	BnaC01g04560D	LK031789	2343116	2346180	-	-0.703306	1.03831	0	0.74448	1	0.780599	1.03831	0	0.689179	1	0.129745	1.03831	0	0.98041	1
GSBRNA2T00130748001	BnaC01g04550D	LK031789	2346654	2348325	+	0.376251	2.4293	0	0.984065	1	0.0329173	2.4293	0	0.999676	1	0.288666	2.4293	0	0.987095	1
GSBRNA2T00130749001	BnaC01g04540D	LK031789	2348471	2351391	-	-0.192332	4.37745	0	0.999952	1	0.250437	4.37745	0	0.999913	1	-0.0952322	4.37745	0	0.999978	1
GSBRNA2T00130750001	BnaC01g04530D	LK031789	2353587	2354111	+	-2.17249	5.64119	-3.35492	0.00302453	0.0960728	3.65568	5.64119	7.79534	3.17596e-06	0.00501893	0.94938	5.64119	0	0.570616	1
GSBRNA2T00130755001	BnaC01g04500D	LK031789	2368484	2370361	+	0.152401	4.69525	0	0.999788	1	0.16043	4.69525	0	0.999811	1	0.802446	4.69525	0	0.861228	1
GSBRNA2T00130756001	BnaC01g04490D	LK031789	2370823	2374529	-	0.302513	3.12079	0	0.990078	1	-0.199267	3.12079	0	0.995994	1	0.244134	3.12079	0	0.99049	1
GSBRNA2T00130757001	BnaC01g04480D	LK031789	2376704	2379501	-	0.10329	2.92377	0	0.997445	1	0.656214	2.92377	0	0.905341	1	0.636239	2.92377	0	0.89693	1
GSBRNA2T00130759001	BnaC01g04470D	LK031789	2389850	2393428	-	-0.0861188	3.18842	0	0.999678	1	0.00899983	3.18842	0	0.999967	1	0.610017	3.18842	0	0.962334	1
GSBRNA2T00130767001	BnaC01g04410D	LK031789	2454211	2455076	+	-0.300692	4.69634	0	0.997485	1	0.772947	4.69634	0	0.864454	1	0.593017	4.69634	0	0.969804	1
GSBRNA2T00130768001	BnaC01g04400D	LK031789	2455411	2456568	+	0.373285	1.00854	0	0.932934	1	0.0514313	1.00854	0	0.995287	1	0.199982	1.00854	0	0.962455	1
GSBRNA2T00130769001	BnaC01g04390D	LK031789	2456843	2458334	+	-0.0500511	2.47707	0	0.99607	1	0.492734	2.47707	0	0.92585	1	1.32858	2.47707	1.05147	0.157315	0.648971
GSBRNA2T00130770001	BnaC01g04380D	LK031789	2458657	2461112	+	-1.35415	3.19669	-1.74272	0.0540025	0.997289	0.342447	3.19669	0	0.993366	1	-0.207472	3.19669	0	0.99953	1
GSBRNA2T00130774001	BnaC01g04340D	LK031789	2481026	2482759	-	0.447179	1.7949	0	0.924163	1	-0.823856	1.7949	0	0.671092	1	2.18626	1.7949	3.71676	0.00157704	0.0131464
GSBRNA2T00130775001	BnaC01g04330D	LK031789	2486733	2489168	+	-0.47244	4.03684	0	0.912247	1	-0.161443	4.03684	0	0.978706	1	-0.118177	4.03684	0	0.987268	1
GSBRNA2T00130777001	BnaC01g04310D	LK031789	2493426	2495623	-	-0.0804356	1.43707	0	0.991293	1	0.413123	1.43707	0	0.936994	1	0.951154	1.43707	0	0.554697	1
GSBRNA2T00130778001	BnaC01g04300D	LK031789	2496079	2503026	+	0.331948	4.71884	0	0.999853	1	-0.409086	4.71884	0	0.999594	1	-0.00334331	4.71884	0	1	1
GSBRNA2T00130779001	BnaC01g04290D	LK031789	2503866	2508327	+	0.165909	6.47999	0	0.999977	1	-0.2352	6.47999	0	0.999947	1	-0.20207	6.47999	0	0.999956	1
GSBRNA2T00130780001	BnaC01g04280D	LK031789	2509344	2517844	+	0.653708	4.70907	0	0.811829	1	0.0546054	4.70907	0	0.995555	1	1.49875	4.70907	1.3464	0.102057	0.453349
GSBRNA2T00130783001	BnaC01g04250D	LK031789	2524599	2526050	-	1.65081	0.217291	0.717473	0.250341	1	-3.80675	0.217291	-2.4104	0.0176048	1	5.50141	0.217291	5.77118	5.37878e-05	0.000870838
GSBRNA2T00130784001	BnaC01g04240D	LK031789	2528089	2529916	-	0.361963	4.41564	0	0.998864	1	0.187216	4.41564	0	0.999891	1	1.29274	4.41564	1.84638	0.0453465	0.228013
GSBRNA2T00130785001	BnaC01g04230D	LK031789	2530664	2535647	+	-0.0135765	3.491	0	0.999967	1	-0.257284	3.491	0	0.998268	1	0.600331	3.491	0	0.968929	1
GSBRNA2T00130788001	BnaC01g04210D	LK031789	2559588	2563731	+	0.00256553	5.42399	0	1	1	0.0289606	5.42399	0	0.999996	1	-0.621086	5.42399	0	0.986917	1
GSBRNA2T00130789001	BnaC01g04200D	LK031789	2563781	2564776	-	1.0095	2.14578	0.0261122	0.489884	1	-0.703811	2.14578	0	0.79893	1	1.01593	2.14578	0.0413274	0.483993	1
GSBRNA2T00130790001	BnaC01g04190D	LK031789	2564827	2568958	-	-0.185703	4.93145	0	0.999683	1	0.340522	4.93145	0	0.998572	1	-1.25021	4.93145	-1.20047	0.127041	0.54428
GSBRNA2T00130793001	BnaC01g04180D	LK031789	2582099	2584657	-	0.176176	4.31756	0	0.999928	1	-0.552742	4.31756	0	0.993132	1	-1.0031	4.31756	-0.0169535	0.493382	1
GSBRNA2T00130794001	BnaC01g04170D	LK031789	2587197	2590307	-	-0.148555	4.31481	0	0.999809	1	0.335774	4.31481	0	0.998852	1	0.325582	4.31481	0	0.998803	1
GSBRNA2T00130795001	BnaC01g04160D	LK031789	2591623	2593793	-	0.309719	2.49004	0	0.996135	1	-0.356625	2.49004	0	0.994101	1	-1.01349	2.49004	-0.0442776	0.482736	1
GSBRNA2T00130799001	BnaC01g04120D	LK031789	2610094	2614269	+	-1.62073	3.49109	-2.69283	0.0100992	0.258469	0.839538	3.49109	0	0.736865	1	-0.297525	3.49109	0	0.997833	1
GSBRNA2T00130804001	BnaC01g04100D	LK031789	2628207	2628823	+	-0.149972	2.80267	0	0.998225	1	0.152441	2.80267	0	0.998217	1	0.312148	2.80267	0	0.992936	1
GSBRNA2T00130806001	BnaC01g04090D	LK031789	2629744	2631759	-	0.000690465	4.32738	0	1	1	0.0294788	4.32738	0	0.99998	1	0.34423	4.32738	0	0.99873	1
GSBRNA2T00130807001	BnaC01g04080D	LK031789	2632700	2634081	-	0.100995	4.12711	0	0.99988	1	0.340128	4.12711	0	0.998906	1	-0.296491	4.12711	0	0.997966	1
GSBRNA2T00130808001	BnaC01g04070D	LK031789	2634363	2638510	+	0.191984	3.15973	0	0.999185	1	-0.191106	3.15973	0	0.999204	1	0.549088	3.15973	0	0.976391	1
GSBRNA2T00130810001	BnaC01g04050D	LK031789	2642728	2644733	+	0.0427443	2.86174	0	0.999019	1	0.444559	2.86174	0	0.975174	1	0.690307	2.86174	0	0.864892	1
GSBRNA2T00130812001	BnaC01g04040D	LK031789	2645637	2649002	+	0.455528	4.05221	0	0.996041	1	-0.26873	4.05221	0	0.999536	1	0.551435	4.05221	0	0.986555	1
GSBRNA2T00130815001	BnaC01g04020D	LK031789	2653839	2654656	+	0.381702	1.95549	0	0.971788	1	0.10457	1.95549	0	0.99771	1	0.173861	1.95549	0	0.98791	1
GSBRNA2T00130816001	BnaC01g04010D	LK031789	2654719	2657180	+	-0.762578	3.28524	0	0.88297	1	-0.0747507	3.28524	0	0.999679	1	-0.152067	3.28524	0	0.999665	1
GSBRNA2T00130822001	BnaC01g03980D	LK031789	2674452	2675983	-	-3.0372	1.97053	-5.30562	0.000107549	0.00555936	-0.988779	1.97053	0	0.510306	1	1.45145	1.97053	2.53552	0.0134371	0.0807613
GSBRNA2T00130827001	BnaC01g03950D	LK031789	2698741	2706513	+	-0.547686	4.8655	0	0.996639	1	-0.0984978	4.8655	0	0.99998	1	-0.162879	4.8655	0	0.999967	1
GSBRNA2T00130829001	BnaC01g03930D	LK031789	2710476	2715381	+	0.00830209	7.07704	0	1	1	0.357648	7.07704	0	0.999862	1	-0.184123	7.07704	0	0.99998	1
GSBRNA2T00130830001	BnaC01g03920D	LK031789	2715693	2718337	-	0.136865	4.20128	0	0.999938	1	0.0850631	4.20128	0	0.999974	1	0.161541	4.20128	0	0.999872	1
GSBRNA2T00130834001	BnaC01g03890D	LK031789	2725644	2729336	-	0.282522	6.80897	0	0.999391	1	0.281719	6.80897	0	0.99946	1	2.46041	6.80897	8.94664	7.99317e-07	4.28186e-05
GSBRNA2T00130835001	BnaC01g03880D	LK031789	2731231	2734408	-	-0.231755	6.12157	0	0.99993	1	0.177324	6.12157	0	0.999962	1	-1.03376	6.12157	-0.230813	0.410756	1
GSBRNA2T00130836001	BnaC01g03870D	LK031789	2734784	2737657	-	0.227576	3.55838	0	0.999803	1	-0.251103	3.55838	0	0.999746	1	-1.24618	3.55838	-1.13068	0.1406	0.591939
GSBRNA2T00130837001	BnaC01g03860D	LK031789	2741756	2743942	+	0.267922	3.26576	0	0.960677	1	2.79735	3.26576	6.04931	3.43912e-05	0.0225596	1.50766	3.26576	1.42511	0.0903448	0.409294
GSBRNA2T00130838001	BnaC01g03850D	LK031789	2744828	2746127	+	-1.01563	2.85476	-0.049189	0.480828	1	0.641906	2.85476	0	0.850629	1	0.304257	2.85476	0	0.98688	1
GSBRNA2T00130839001	BnaC01g03840D	LK031789	2750449	2751452	+	0.324236	0.422191	0	0.90444	1	0.343535	0.422191	0	0.916386	1	-2.61975	0.422191	-1.7481	0.0546446	0.267203
GSBRNA2T00130841001	BnaC01g03830D	LK031789	2754978	2757982	-	-0.0378645	3.90555	0	0.999968	1	0.156845	3.90555	0	0.999836	1	-0.691843	3.90555	0	0.922036	1
GSBRNA2T00130843001	BnaC01g03820D	LK031789	2759794	2763603	+	-1.30879	0.802982	-0.534707	0.302473	1	-0.154579	0.802982	0	0.93774	1	-0.840883	0.802982	0	0.609711	1
GSBRNA2T00130846001	BnaC01g03810D	LK031789	2778138	2778602	+	0.25551	7.40017	0	0.999813	1	0.430932	7.40017	0	0.998736	1	1.16167	7.40017	1.08406	0.150262	0.625357
GSBRNA2T00130848001	BnaC01g03800D	LK031789	2788259	2789396	-	-0.69804	4.10554	0	0.96748	1	0.314566	4.10554	0	0.999585	1	-0.166377	4.10554	0	0.99994	1
GSBRNA2T00130849001	BnaC01g03790D	LK031789	2790177	2791011	-	-0.295465	4.37766	0	0.992239	1	1.25772	4.37766	1.11061	0.1447	1	0.984576	4.37766	0	0.526163	1
GSBRNA2T00130850001	BnaC01g03780D	LK031789	2791798	2795430	+	-0.465152	3.78165	0	0.989295	1	0.315747	3.78165	0	0.997026	1	0.116851	3.78165	0	0.999624	1
GSBRNA2T00130852001	BnaC01g03760D	LK031789	2799258	2802311	-	-0.121636	4.35264	0	0.999963	1	0.285015	4.35264	0	0.999795	1	0.132051	4.35264	0	0.999947	1
GSBRNA2T00130853001	BnaC01g03750D	LK031789	2802659	2804209	+	-0.410217	5.89042	0	0.99867	1	0.453465	5.89042	0	0.997833	1	0.303426	5.89042	0	0.999626	1
GSBRNA2T00130855001	BnaC01g03740D	LK031789	2808235	2809645	+	-0.478722	3.87447	0	0.984907	1	0.390894	3.87447	0	0.992644	1	0.210778	3.87447	0	0.99876	1
GSBRNA2T00130856001	BnaC01g03730D	LK031789	2810603	2811896	+	-0.269949	3.12465	0	0.9959	1	0.294763	3.12465	0	0.99513	1	0.113295	3.12465	0	0.998877	1
GSBRNA2T00130857001	BnaC01g03720D	LK031789	2811946	2814706	-	-0.632408	2.89698	0	0.939513	1	0.363906	2.89698	0	0.991967	1	-1.98212	2.89698	-2.92757	0.00658409	0.0438169
GSBRNA2T00130859001	BnaC01g03710D	LK031789	2817266	2824650	-	0.894875	1.82831	0	0.641401	1	-0.40323	1.82831	0	0.979917	1	-3.24814	1.82831	-3.17439	0.00423455	0.0301675
GSBRNA2T00130863001	BnaC01g03690D	LK031789	2845129	2848608	-	-0.712471	2.97356	0	0.829198	1	0.165347	2.97356	0	0.991362	1	-0.204223	2.97356	0	0.991419	1
GSBRNA2T00130865001	BnaC01g03670D	LK031789	2861274	2861951	-	-0.309795	1.12737	0	0.976526	1	0.341063	1.12737	0	0.972582	1	-2.5475	1.12737	-2.80321	0.0082795	0.0532565
GSBRNA2T00130869001	BnaC01g03630D	LK031789	2875787	2881980	-	-0.0510027	1.68252	0	0.997779	1	0.233107	1.68252	0	0.988079	1	-1.38155	1.68252	-0.847106	0.207212	0.812397
GSBRNA2T00130871001	BnaC01g03610D	LK031789	2884471	2887743	-	0.717581	3.2492	0	0.864818	1	-0.891449	3.2492	0	0.663664	1	1.24659	3.2492	1.01329	0.165875	0.677965
GSBRNA2T00130874001	BnaC01g03590D	LK031789	2891212	2892579	+	-0.40771	7.86464	0	0.999487	1	0.317672	7.86464	0	0.999829	1	-0.524257	7.86464	0	0.997488	1
GSBRNA2T00130877001	BnaC01g03570D	LK031789	2895900	2902018	-	0.0470898	4.21037	0	0.999814	1	-0.177838	4.21037	0	0.998942	1	0.900065	4.21037	0	0.685475	1
GSBRNA2T00130878001	BnaC01g03560D	LK031789	2902973	2905957	+	0.207464	3.2778	0	0.998981	1	-0.0620143	3.2778	0	0.999837	1	0.14782	3.2778	0	0.998991	1
GSBRNA2T00130880001	BnaC01g03540D	LK031789	2909928	2912614	-	0.685414	3.25137	0	0.814916	1	0.469989	3.25137	0	0.956389	1	1.31542	3.25137	0.946293	0.181731	0.729744
GSBRNA2T00130881001	BnaC01g03530D	LK031789	2919323	2921283	+	0.0860403	4.30223	0	0.999958	1	0.0418636	4.30223	0	0.999984	1	0.0919397	4.30223	0	0.999928	1
GSBRNA2T00130884001	BnaC01g03510D	LK031789	2935199	2936396	-	0.0704823	2.34621	0	0.997239	1	-0.0339728	2.34621	0	0.998722	1	-0.370986	2.34621	0	0.948445	1
GSBRNA2T00130887001	BnaC01g03490D	LK031789	2946059	2947826	+	-0.151895	6.23224	0	0.999989	1	0.195359	6.23224	0	0.999983	1	-0.998699	6.23224	0	0.503876	1
GSBRNA2T00130889001	BnaC01g03470D	LK031789	2949878	2951709	+	0.357855	0.787029	0	0.973067	1	-0.665807	0.787029	0	0.843083	1	-4.06428	0.787029	-4.09653	0.000818604	0.00765299
GSBRNA2T00130890001	BnaC01g03460D	LK031789	2958473	2960177	+	-1.42053	1.66753	-1.04517	0.158736	1	-0.322544	1.66753	0	0.905829	1	0.331919	1.66753	0	0.973563	1
GSBRNA2T00130894001	BnaC01g03440D	LK031789	2976292	2977115	+	-0.399883	2.00592	0	0.946683	1	-0.627521	2.00592	0	0.809363	1	1.20574	2.00592	0.707045	0.246807	0.934032
GSBRNA2T00130895001	BnaC01g03430D	LK031789	2981775	2983501	+	-0.11097	4.8643	0	0.999983	1	-0.0803824	4.8643	0	0.999988	1	-0.12563	4.8643	0	0.999971	1
GSBRNA2T00130897001	BnaC01g03410D	LK031789	2994573	2996286	+	-0.359336	6.84493	0	0.999638	1	0.194082	6.84493	0	0.999945	1	-0.714824	6.84493	0	0.964316	1
GSBRNA2T00130899001	BnaC01g03400D	LK031789	2997656	3000105	-	0.52208	1.75312	0	0.869025	1	0.47898	1.75312	0	0.921477	1	3.36846	1.75312	7.02562	8.6559e-06	0.000230449
GSBRNA2T00130902001	BnaC01g03370D	LK031789	3015223	3017435	-	-0.133544	3.7226	0	0.999896	1	0.254904	3.7226	0	0.99966	1	-0.328435	3.7226	0	0.998329	1
GSBRNA2T00130903001	BnaC01g03360D	LK031789	3017993	3020119	-	-0.98832	3.84858	0	0.520278	1	-0.471352	3.84858	0	0.966361	1	-0.761887	3.84858	0	0.834945	1
GSBRNA2T00130904001	BnaC01g03350D	LK031789	3027177	3028440	+	-0.633606	-0.0450011	0	0.853367	1	-0.000769399	-0.0450011	0	0.999927	1	-5.50017	-0.0450011	-6.7563	1.28157e-05	0.000301314
GSBRNA2T00130905001	BnaC01g03340D	LK031789	3028938	3030315	+	0.0756748	4.99585	0	0.999989	1	0.189624	4.99585	0	0.99996	1	0.279755	4.99585	0	0.999847	1
GSBRNA2T00130907001	BnaC01g03320D	LK031789	3032109	3035063	-	-0.0565877	5.79568	0	0.999992	1	-0.118159	5.79568	0	0.999978	1	0.238423	5.79568	0	0.99991	1
GSBRNA2T00130908001	BnaC01g03310D	LK031789	3036789	3040123	-	0.255997	5.38285	0	0.999785	1	-0.569003	5.38285	0	0.991375	1	-0.447129	5.38285	0	0.997121	1
GSBRNA2T00130909001	BnaC01g03300D	LK031789	3048709	3051461	+	0.0832427	4.51121	0	0.999988	1	0.0789354	4.51121	0	0.99999	1	0.136988	4.51121	0	0.999965	1
GSBRNA2T00130910001	BnaC01g03290D	LK031789	3051515	3054158	-	-0.212791	4.70522	0	0.999894	1	0.215654	4.70522	0	0.999892	1	0.470702	4.70522	0	0.998118	1
GSBRNA2T00130911001	BnaC01g03280D	LK031789	3056424	3061447	-	0.805836	4.25079	0	0.829175	1	-0.884954	4.25079	0	0.715	1	-0.95792	4.25079	0	0.564148	1
GSBRNA2T00130912001	BnaC01g03270D	LK031789	3067949	3071495	-	0.0542137	1.63601	0	0.99829	1	-1.05936	1.63601	-0.167915	0.43483	1	0.415512	1.63601	0	0.963916	1
GSBRNA2T00130913001	BnaC01g03260D	LK031789	3078876	3083966	+	0.220417	5.49734	0	0.999961	1	-0.262005	5.49734	0	0.999936	1	-1.22712	5.49734	-1.5184	0.0779457	0.361904
GSBRNA2T00130914001	BnaC01g03250D	LK031789	3084246	3088011	-	0.664685	5.15629	0	0.987001	1	-0.956334	5.15629	0	0.625385	1	-1.24718	5.15629	-1.55819	0.0731224	0.342855
GSBRNA2T00130916001	BnaC01g03240D	LK031789	3095142	3098382	+	0.15661	6.78502	0	0.999966	1	-0.303082	6.78502	0	0.999812	1	-0.160396	6.78502	0	0.999957	1
GSBRNA2T00130917001	BnaC01g03230D	LK031789	3099285	3100046	-	0.402735	3.03453	0	0.994973	1	-0.734558	3.03453	0	0.891116	1	-3.13035	3.03453	-4.6625	0.000306982	0.00343447
GSBRNA2T00130919001	BnaC01g03210D	LK031789	3103729	3105218	+	-0.102947	5.26633	0	0.999923	1	-0.0814813	5.26633	0	0.99994	1	-3.98375	5.26633	-9.78956	3.18307e-07	2.41011e-05
GSBRNA2T00130920001	BnaC01g03200D	LK031789	3105267	3107738	-	0.266353	4.83598	0	0.999533	1	-0.173792	4.83598	0	0.999834	1	0.651412	4.83598	0	0.969655	1
GSBRNA2T00130922001	BnaC01g03180D	LK031789	3114423	3121042	+	0.0745182	3.83593	0	0.99986	1	0.296194	3.83593	0	0.998921	1	0.587894	3.83593	0	0.975381	1
GSBRNA2T00130924001	BnaC01g03160D	LK031789	3129023	3130417	+	0.128796	2.19745	0	0.991357	1	0.152303	2.19745	0	0.991687	1	0.667179	2.19745	0	0.833039	1
GSBRNA2T00130927001	BnaC01g03130D	LK031789	3134768	3138500	-	-0.438363	1.86456	0	0.944531	1	0.193131	1.86456	0	0.984785	1	-0.94905	1.86456	0	0.548788	1
GSBRNA2T00130928001	BnaC01g03120D	LK031789	3138800	3140947	+	-0.108797	5.52687	0	0.999817	1	-0.24839	5.52687	0	0.999127	1	0.126564	5.52687	0	0.999751	1
GSBRNA2T00130929001	BnaC01g03110D	LK031789	3143256	3146362	+	-0.148875	3.69079	0	0.99968	1	-0.0895794	3.69079	0	0.999802	1	0.202699	3.69079	0	0.999358	1
GSBRNA2T00130930001	BnaC01g03100D	LK031789	3153838	3154687	-	0.818771	3.66562	0	0.762083	1	-0.24326	3.66562	0	0.996931	1	0.176523	3.66562	0	0.994043	1
GSBRNA2T00130931001	BnaC01g03090D	LK031789	3159435	3161309	+	0.251532	4.13159	0	0.999799	1	-0.239308	4.13159	0	0.999828	1	-0.191045	4.13159	0	0.999745	1
GSBRNA2T00130932001	BnaC01g03080D	LK031789	3164020	3164961	-	-0.0728569	1.37856	0	0.975264	1	1.48639	1.37856	0.974712	0.175052	1	2.06942	1.37856	2.17479	0.025669	0.140901
GSBRNA2T00130934001	BnaC01g03060D	LK031789	3171225	3172672	+	0.235076	2.15976	0	0.98143	1	-0.168424	2.15976	0	0.989325	1	0.478772	2.15976	0	0.922233	1
GSBRNA2T00130935001	BnaC01g03050D	LK031789	3172736	3174529	-	0.126708	4.6174	0	0.999857	1	0.276019	4.6174	0	0.999481	1	1.10749	4.6174	0.643783	0.266167	0.990111
GSBRNA2T00130936001	BnaC01g03040D	LK031789	3178747	3180081	-	-0.141224	5.08244	0	0.999807	1	0.135609	5.08244	0	0.99982	1	0.311423	5.08244	0	0.998878	1
GSBRNA2T00130938001	BnaC01g03020D	LK031789	3182720	3182905	-	-1.75866	1.55274	-1.20581	0.126536	1	2.33034	1.55274	2.21561	0.0239283	1	2.24803	1.55274	3.34805	0.0030628	0.0229661
GSBRNA2T00130940001	BnaC01g03000D	LK031789	3188575	3191081	+	-0.334522	2.00245	0	0.975444	1	-0.657155	2.00245	0	0.819264	1	0.260431	2.00245	0	0.985563	1
GSBRNA2T00130947001	BnaC01g02940D	LK031789	3216501	3218641	+	-0.101337	4.45821	0	0.999976	1	0.165102	4.45821	0	0.999951	1	-1.10974	4.45821	-0.62237	0.272915	1
GSBRNA2T00130948001	BnaC01g02930D	LK031789	3219120	3220372	-	0.531462	5.78038	0	0.996562	1	0.0627866	5.78038	0	0.999991	1	1.57372	5.78038	4.08724	0.000819544	0.00765692
GSBRNA2T00130949001	BnaC01g02920D	LK031789	3220745	3222965	-	0.108719	3.33177	0	0.999751	1	0.00667636	3.33177	0	0.999989	1	0.678669	3.33177	0	0.941967	1
GSBRNA2T00130950001	BnaC01g02910D	LK031789	3223217	3224334	+	-0.825636	-1.93751	0	0.61373	1	0.0184659	-1.93751	0	0.991439	1	8.00493	-1.93751	9.89035	3.04928e-07	2.3506e-05
GSBRNA2T00130955001	BnaC01g02880D	LK031789	3229666	3232120	-	0.259589	4.23491	0	0.999676	1	-0.10186	4.23491	0	0.999952	1	0.0749342	4.23491	0	0.999928	1
GSBRNA2T00130956001	BnaC01g02870D	LK031789	3232251	3244760	-	0.133355	6.49086	0	0.998737	1	-0.0924867	6.49086	0	0.999207	1	-1.36407	6.49086	-1.46477	0.0848789	0.388711
GSBRNA2T00130966001	BnaC01g02790D	LK031789	3268651	3273489	-	0.019261	6.99821	0	0.999999	1	0.0539763	6.99821	0	0.999997	1	-0.119442	6.99821	0	0.99999	1
GSBRNA2T00130967001	BnaC01g02780D	LK031789	3282670	3284246	+	0.257035	4.26556	0	0.999744	1	0.303557	4.26556	0	0.999719	1	0.0403324	4.26556	0	0.999969	1
GSBRNA2T00130968001	BnaC01g02770D	LK031789	3285277	3288601	+	0.922847	3.78386	0	0.610825	1	0.263958	3.78386	0	0.996233	1	0.799654	3.78386	0	0.751986	1
GSBRNA2T00130969001	BnaC01g02760D	LK031789	3288659	3290415	-	0.180074	4.45491	0	0.999922	1	0.175377	4.45491	0	0.999946	1	0.91436	4.45491	0	0.714787	1
GSBRNA2T00130972001	BnaC01g02740D	LK031789	3294619	3297307	+	-0.142743	4.19109	0	0.999611	1	0.157754	4.19109	0	0.999556	1	-0.545341	4.19109	0	0.970933	1
GSBRNA2T00130973001	BnaC01g02730D	LK031789	3300692	3304224	+	0.17334	4.70816	0	0.999982	1	-0.182609	4.70816	0	0.99998	1	0.0933372	4.70816	0	0.99999	1
GSBRNA2T00130974001	BnaC01g02720D	LK031789	3308122	3309179	+	0.647894	0.0297911	0	0.825156	1	0.184958	0.0297911	0	0.990049	1	-4.69032	0.0297911	-5.22486	0.000124403	0.00167925
GSBRNA2T00130981001	BnaC01g02670D	LK031789	3350435	3354017	-	-0.0664389	4.62817	0	0.999974	1	-0.0288097	4.62817	0	0.999989	1	-2.10957	4.62817	-5.03153	0.00016669	0.00211824
GSBRNA2T00130983001	BnaC01g02660D	LK031789	3362439	3364002	+	-0.383465	1.49805	0	0.95886	1	0.159775	1.49805	0	0.988258	1	0.285906	1.49805	0	0.978883	1
GSBRNA2T00130985001	BnaC01g02640D	LK031789	3368240	3370010	+	0.315124	2.9043	0	0.996559	1	0.161233	2.9043	0	0.999469	1	-1.60588	2.9043	-1.78544	0.0502728	0.248794
GSBRNA2T00130986001	BnaC01g02630D	LK031789	3370063	3370730	-	-0.4472	2.52912	0	0.956395	1	-0.0377983	2.52912	0	0.998117	1	0.360705	2.52912	0	0.978689	1
GSBRNA2T00130988001	BnaC01g02610D	LK031789	3376159	3377949	-	0.747189	3.44979	0	0.804238	1	-0.877253	3.44979	0	0.660455	1	-2.07975	3.44979	-2.09276	0.0296656	0.158897
GSBRNA2T00130991001	BnaC01g02600D	LK031789	3385069	3385557	-	-0.182243	3.32014	0	0.948617	1	1.85187	3.32014	1.89634	0.0416656	1	2.25132	3.32014	2.91013	0.00680042	0.0449112
GSBRNA2T00130992001	BnaC01g02590D	LK031789	3389986	3392759	-	0.384199	2.7315	0	0.995021	1	-0.100349	2.7315	0	0.999772	1	-1.25782	2.7315	-0.851489	0.205936	0.808328
GSBRNA2T00130993001	BnaC01g02580D	LK031789	3392839	3406840	-	0.396292	4.22568	0	0.997777	1	-0.13689	4.22568	0	0.99988	1	-0.0874052	4.22568	0	0.999806	1
GSBRNA2T00130998001	BnaC01g02540D	LK031789	3427506	3427820	+	-0.952387	1.153	0	0.551647	1	0.701807	1.153	0	0.781096	1	-1.86509	1.153	-1.77449	0.0512479	0.252744
GSBRNA2T00130999001	BnaC01g02530D	LK031789	3430451	3434770	-	0.298892	2.95453	0	0.997222	1	-0.850736	2.95453	0	0.741354	1	-2.3372	2.95453	-3.39025	0.00283784	0.0215828
GSBRNA2T00131000001	BnaC01g02520D	LK031789	3435303	3436877	+	0.274257	5.9394	0	0.999708	1	0.498858	5.9394	0	0.996788	1	0.506505	5.9394	0	0.995659	1
GSBRNA2T00131003001	BnaC01g02500D	LK031789	3441369	3443464	-	1.13596	4.23697	0.820061	0.214419	1	0.0100411	4.23697	0	0.999998	1	0.288849	4.23697	0	0.998606	1
GSBRNA2T00131005001	BnaC01g02480D	LK031789	3444308	3446058	-	0.912206	4.20971	0	0.711944	1	-0.0931026	4.20971	0	0.999986	1	0.734503	4.20971	0	0.935979	1
GSBRNA2T00131013001	BnaC01g02430D	LK031789	3475197	3479058	-	-0.524314	5.39335	0	0.997847	1	-0.258388	5.39335	0	0.999909	1	-3.16402	5.39335	-11.3394	6.77561e-08	9.5785e-06
GSBRNA2T00131014001	BnaC01g02420D	LK031789	3479213	3481894	+	0.0670307	4.61165	0	0.999982	1	-0.05558	4.61165	0	0.999985	1	-0.61406	4.61165	0	0.978879	1
GSBRNA2T00131015001	BnaC01g02410D	LK031789	3482456	3486440	+	0.062288	4.81373	0	0.999991	1	0.142048	4.81373	0	0.999975	1	0.0870717	4.81373	0	0.99998	1
GSBRNA2T00131017001	BnaC01g02400D	LK031789	3491668	3494172	-	0.199682	6.40637	0	0.989234	1	0.104185	6.40637	0	0.995371	1	-1.84402	6.40637	-2.43634	0.0160748	0.0945217
GSBRNA2T00131022001	BnaC01g02350D	LK031789	3532615	3540600	-	0.376254	5.33446	0	0.999851	1	-0.193023	5.33446	0	0.999986	1	-0.257877	5.33446	0	0.99994	1
GSBRNA2T00131023001	BnaC01g02340D	LK031789	3542176	3546907	-	0.0640426	6.12978	0	0.999963	1	0.215775	6.12978	0	0.999781	1	-1.79867	6.12978	-4.29588	0.000570753	0.00570083
GSBRNA2T00131025001	BnaC01g02320D	LK031789	3560458	3563933	-	-0.31795	4.8411	0	0.999375	1	0.141919	4.8411	0	0.999898	1	-0.389804	4.8411	0	0.998066	1
GSBRNA2T00131028001	BnaC01g02300D	LK031789	3569667	3570898	-	-0.468825	5.52917	0	0.994259	1	0.364966	5.52917	0	0.997992	1	-1.73321	5.52917	-3.57763	0.002023	0.0162489
GSBRNA2T00131029001	BnaC01g02290D	LK031789	3571861	3575010	-	0.0681281	3.78299	0	0.999958	1	-0.149438	3.78299	0	0.999872	1	-0.282575	3.78299	0	0.998855	1
GSBRNA2T00131032001	BnaC01g02260D	LK031789	3586657	3588100	+	-0.481889	3.49691	0	0.991508	1	-0.208392	3.49691	0	0.998953	1	-0.322543	3.49691	0	0.99748	1
GSBRNA2T00131033001	BnaC01g02250D	LK031789	3588635	3589006	-	-0.037995	0.839928	0	0.985181	1	0.870642	0.839928	0	0.587019	1	3.07107	0.839928	3.99077	0.000973407	0.0088279
GSBRNA2T00131035001	BnaC01g02230D	LK031789	3590863	3595084	-	0.0852546	5.41089	0	0.999996	1	-0.0858732	5.41089	0	0.999996	1	-0.516117	5.41089	0	0.99828	1
GSBRNA2T00131036001	BnaC01g02220D	LK031789	3601443	3604302	-	0.320512	3.66038	0	0.991759	1	0.195132	3.66038	0	0.997775	1	-2.25538	3.66038	-2.87628	0.00723398	0.0473155
GSBRNA2T00131037001	BnaC01g02210D	LK031789	3605514	3608092	-	0.683997	3.12543	0	0.948898	1	-0.546597	3.12543	0	0.988181	1	-1.21092	3.12543	-0.785153	0.224114	0.864417
GSBRNA2T00131039001	BnaC01g02200D	LK031789	3614681	3616390	+	0.617367	0.719817	0	0.819163	1	-1.7673	0.719817	-1.48586	0.0821903	1	-5.22041	0.719817	-3.65843	0.00184377	0.0150154
GSBRNA2T00131042001	BnaC01g02170D	LK031789	3625015	3627291	-	0.100385	2.10715	0	0.999105	1	0.264059	2.10715	0	0.997081	1	-3.62374	2.10715	-4.48281	0.000417402	0.00441026
GSBRNA2T00131044001	BnaC01g02150D	LK031789	3653607	3655327	+	0.350634	3.15392	0	0.989857	1	-1.84044	3.15392	-2.62302	0.0114664	1	-0.589479	3.15392	0	0.901405	1
GSBRNA2T00131046001	BnaC01g02130D	LK031789	3656878	3659364	-	0.34969	4.42396	0	0.99821	1	-0.0834306	4.42396	0	0.999914	1	0.659058	4.42396	0	0.95708	1
GSBRNA2T00131050001	BnaC01g02100D	LK031789	3689109	3690727	+	0.218373	1.56877	0	0.967772	1	0.182576	1.56877	0	0.979355	1	0.99178	1.56877	0	0.508476	1
GSBRNA2T00131056001	BnaC01g02070D	LK031789	3702489	3704418	-	0.342387	3.88764	0	0.973937	1	0.367962	3.88764	0	0.978986	1	2.40144	3.88764	5.13676	0.000140647	0.00184889
GSBRNA2T00131059001	BnaC01g02050D	LK031789	3713698	3715003	+	-0.346176	1.9949	0	0.978882	1	0.0619936	1.9949	0	0.99767	1	-0.511823	1.9949	0	0.916693	1
GSBRNA2T00131065001	BnaC01g02020D	LK031789	3730055	3736153	-	-0.385848	3.82782	0	0.999068	1	0.0768618	3.82782	0	0.999965	1	-0.0709196	3.82782	0	0.99997	1
GSBRNA2T00131067001	BnaC01g02010D	LK031789	3742860	3747724	+	-0.691602	4.37632	0	0.904166	1	0.0523361	4.37632	0	0.999544	1	-0.689276	4.37632	0	0.89201	1
GSBRNA2T00131068001	BnaC01g02000D	LK031789	3747791	3750402	-	0.00314318	3.54768	0	0.999995	1	0.00885573	3.54768	0	0.999986	1	-0.110907	3.54768	0	0.999577	1
GSBRNA2T00131071001	BnaC01g01970D	LK031789	3760406	3762394	-	-0.00749004	3.48441	0	0.999974	1	-0.100614	3.48441	0	0.99957	1	-0.491091	3.48441	0	0.972034	1
GSBRNA2T00131072001	BnaC01g01960D	LK031789	3764079	3765582	+	0.519771	1.57022	0	0.866292	1	-0.108585	1.57022	0	0.987148	1	1.20129	1.57022	0.496781	0.314436	1
GSBRNA2T00131074001	BnaC01g01940D	LK031789	3767425	3768938	-	-0.771322	4.30131	0	0.804504	1	0.892713	4.30131	0	0.659328	1	-1.35353	4.30131	-1.15626	0.13551	0.574105
GSBRNA2T00131075001	BnaC01g01930D	LK031789	3773420	3775477	+	0.0138853	1.31392	0	0.998401	1	0.248531	1.31392	0	0.970694	1	-0.181735	1.31392	0	0.966305	1
GSBRNA2T00131077001	BnaC01g01910D	LK031789	3780350	3781455	+	0.89216	3.28458	0	0.569905	1	2.26575	3.28458	2.7559	0.00901126	0.86717	6.02943	3.28458	8.60936	1.21519e-06	5.71226e-05
GSBRNA2T00131078001	BnaC01g01900D	LK031789	3781558	3783811	-	-0.166146	3.97748	0	0.999933	1	-0.262722	3.97748	0	0.999723	1	-0.814565	3.97748	0	0.842614	1
GSBRNA2T00131079001	BnaC01g01890D	LK031789	3785956	3787873	-	0.708398	1.16605	0	0.701248	1	0.413511	1.16605	0	0.888933	1	3.25691	1.16605	4.88249	0.000213221	0.00256794
GSBRNA2T00131080001	BnaC01g01880D	LK031789	3790603	3792374	+	-0.301676	3.1373	0	0.997125	1	0.112244	3.1373	0	0.999444	1	-0.231799	3.1373	0	0.99756	1
GSBRNA2T00131081001	BnaC01g01870D	LK031789	3794499	3797021	+	0.30412	2.35195	0	0.996359	1	-0.00118517	2.35195	0	0.999996	1	-1.52635	2.35195	-1.52067	0.0776697	0.360849
GSBRNA2T00131082001	BnaC01g01860D	LK031789	3797250	3798550	-	0.556195	3.33069	0	0.979924	1	0.0784574	3.33069	0	0.999916	1	0.185269	3.33069	0	0.998667	1
GSBRNA2T00131083001	BnaC01g01850D	LK031789	3798903	3801972	-	0.71992	3.87576	0	0.870547	1	-0.130676	3.87576	0	0.998999	1	-2.50489	3.87576	-3.2791	0.00347361	0.025507
GSBRNA2T00131087001	BnaC01g01810D	LK031789	3818108	3819999	-	-0.137333	1.34144	0	0.993253	1	0.119822	1.34144	0	0.994308	1	-0.788956	1.34144	0	0.702229	1
GSBRNA2T00131092001	BnaC01g01800D	LK031789	3829492	3832369	-	1.32535	0.73183	0.614876	0.275781	1	-0.901526	0.73183	0	0.578918	1	3.24278	0.73183	4.72405	0.000277164	0.00316979
GSBRNA2T00131093001	BnaC01g01790D	LK031789	3833362	3834567	-	0.893925	6.13903	0	0.719327	1	-0.236505	6.13903	0	0.999555	1	1.89293	6.13903	5.08925	0.000151815	0.00196533
GSBRNA2T00131095001	BnaC01g01780D	LK031789	3841647	3846084	+	0.811992	5.92216	0	0.869806	1	-0.342485	5.92216	0	0.999338	1	-0.270314	5.92216	0	0.999451	1
GSBRNA2T00131096001	BnaC01g01770D	LK031789	3848143	3850025	+	2.56695	1.78471	3.52357	0.00223199	0.07369	0.143465	1.78471	0	0.997834	1	1.64295	1.78471	1.29266	0.110843	0.485439
GSBRNA2T00131105001	BnaC01g01710D	LK031789	3881981	3884227	-	0.210196	4.44603	0	0.999871	1	-0.418878	4.44603	0	0.998523	1	-1.46871	4.44603	-2.32838	0.0195116	0.111602
GSBRNA2T00131107001	BnaC01g01700D	LK031789	3897360	3898244	-	-0.340082	3.77935	0	0.995352	1	-0.0369603	3.77935	0	0.999777	1	0.186386	3.77935	0	0.998828	1
GSBRNA2T00131108001	BnaC01g01690D	LK031789	3907117	3909855	+	0.622659	5.64796	0	0.987089	1	0.0229992	5.64796	0	0.999996	1	-2.18977	5.64796	-6.06974	3.33513e-05	0.000612005
GSBRNA2T00131110001	BnaC01g01670D	LK031789	3917452	3919801	-	0.168483	3.22377	0	0.999956	1	-0.446063	3.22377	0	0.998657	1	-5.13981	3.22377	-8.24117	1.85766e-06	7.8209e-05
GSBRNA2T00131111001	BnaC01g01660D	LK031789	3946130	3947347	+	-0.941828	5.08341	0	0.568124	1	0.215624	5.08341	0	0.981085	1	-0.722501	5.08341	0	0.784779	1
GSBRNA2T00131112001	BnaC01g01650D	LK031789	3947541	3951866	-	-0.00612368	4.71917	0	0.999999	1	0.187891	4.71917	0	0.999939	1	0.138647	4.71917	0	0.999949	1
GSBRNA2T00131113001	BnaC01g01640D	LK031789	3951968	3952586	-	0.0146369	2.09467	0	0.999878	1	-0.0702172	2.09467	0	0.999355	1	-0.842459	2.09467	0	0.691252	1
GSBRNA2T00131114001	BnaC01g01630D	LK031789	3952702	3954588	-	-0.696394	1.14833	0	0.754714	1	-0.231609	1.14833	0	0.941643	1	-0.191139	1.14833	0	0.967076	1
GSBRNA2T00131117001	BnaC01g01600D	LK031789	3960454	3961383	+	-0.580885	5.2159	0	0.996791	1	0.263616	5.2159	0	0.999949	1	-2.13106	5.2159	-7.19039	6.92763e-06	0.00019879
GSBRNA2T00131119001	BnaC01g01590D	LK031789	3966423	3974187	-	-0.114239	3.40119	0	0.982678	1	0.537978	3.40119	0	0.87002	1	2.88266	3.40119	5.59333	6.85383e-05	0.00104828
GSBRNA2T00131123001	BnaC01g01570D	LK031789	3988860	3991066	+	-0.61005	2.19022	0	0.713659	1	1.24128	2.19022	0.281333	0.403393	1	5.4289	2.19022	7.12421	7.74611e-06	0.00021376
GSBRNA2T00131128001	BnaC01g01530D	LK031789	4022497	4024315	+	-1.70687	0.675216	-1.65694	0.0622795	1	0.884842	0.675216	0	0.598078	1	-6.88975	0.675216	-5.78184	5.46932e-05	0.00088227
GSBRNA2T00131134001	BnaC01g01490D	LK031789	4044661	4046529	+	-6.38399	0.519766	-7.48577	4.89462e-06	0.000413315	-0.405533	0.519766	0	0.811292	1	0.80386	0.519766	0	0.854496	1
GSBRNA2T00131137001	BnaC01g01470D	LK031789	4051651	4053326	+	1.25052	2.01624	0.618896	0.274091	1	0.358446	2.01624	0	0.974992	1	1.6878	2.01624	1.68923	0.0590417	0.285642
GSBRNA2T00131139001	BnaC01g01450D	LK031789	4056819	4057765	-	-0.306256	3.77741	0	0.999756	1	0.219877	3.77741	0	0.999904	1	-3.46325	3.77741	-7.75251	3.3493e-06	0.000121775
GSBRNA2T00131140001	BnaC01g01440D	LK031789	4059238	4065636	-	0.65615	5.22171	0	0.969461	1	-0.192152	5.22171	0	0.999833	1	0.251341	5.22171	0	0.999438	1
GSBRNA2T00131142001	BnaC01g01420D	LK031789	4068418	4070295	-	0.860398	2.0142	0	0.632938	1	0.512165	2.0142	0	0.925434	1	0.0449778	2.0142	0	0.989462	1
GSBRNA2T00131143001	BnaC01g01410D	LK031789	4070438	4073114	-	0.152567	2.65421	0	0.997536	1	0.09047	2.65421	0	0.998979	1	0.355657	2.65421	0	0.984888	1
GSBRNA2T00131144001	BnaC01g01400D	LK031789	4077058	4078692	+	-0.660276	4.13906	0	0.777152	1	2.28062	4.13906	3.31844	0.00323199	0.441386	2.79336	4.13906	5.41649	9.02366e-05	0.00131126
GSBRNA2T00131148001	BnaC01g01380D	LK031789	4089170	4090242	-	-3.49914	0.144049	-3.13996	0.00453161	0.134605	1.09441	0.144049	0.099829	0.484993	1	1.23936	0.144049	0.636671	0.268437	0.996462
GSBRNA2T00131149001	BnaC01g01370D	LK031789	4094163	4096356	+	0.442614	3.03966	0	0.929815	1	0.221748	3.03966	0	0.985375	1	2.94024	3.03966	6.40584	2.04721e-05	0.000419374
GSBRNA2T00131150001	BnaC01g01360D	LK031789	4096578	4099111	+	-0.392023	3.45177	0	0.995427	1	0.609159	3.45177	0	0.96873	1	0.748365	3.45177	0	0.907899	1
GSBRNA2T00131153001	BnaC01g01350D	LK031789	4121090	4121584	+	-0.34751	2.89922	0	0.96978	1	0.417358	2.89922	0	0.957198	1	0.167063	2.89922	0	0.990754	1
GSBRNA2T00131154001	BnaC01g01340D	LK031789	4121715	4124284	-	-0.455426	1.77913	0	0.923143	1	1.13789	1.77913	0.419267	0.341387	1	-0.450583	1.77913	0	0.905727	1
GSBRNA2T00131155001	BnaC01g01330D	LK031789	4125335	4127649	+	0.816238	3.4602	0	0.819075	1	-0.691615	3.4602	0	0.934282	1	-0.326357	3.4602	0	0.991628	1
GSBRNA2T00131156001	BnaC01g01320D	LK031789	4131841	4132584	+	0.584445	1.36465	0	0.862679	1	0.55703	1.36465	0	0.91821	1	-1.32127	1.36465	-0.580217	0.287159	1
GSBRNA2T00131157001	BnaC01g01310D	LK031789	4135056	4136954	-	-2.78068	1.22594	-3.99349	0.000967178	0.0366088	1.53828	1.22594	1.11347	0.144228	1	-1.70582	1.22594	-1.81137	0.0481278	0.23968
GSBRNA2T00131158001	BnaC01g01300D	LK031789	4138027	4139303	+	0.157352	1.84877	0	0.995225	1	0.337699	1.84877	0	0.987676	1	-0.197079	1.84877	0	0.986146	1
GSBRNA2T00131160001	BnaC01g01290D	LK031789	4155895	4158423	+	-0.225538	3.73132	0	0.999167	1	-0.0305036	3.73132	0	0.999929	1	-3.31288	3.73132	-5.67444	6.05911e-05	0.000953408
GSBRNA2T00131164001	BnaC01g01250D	LK031789	4177962	4179111	-	0.526098	1.83731	0	0.97397	1	-0.611531	1.83731	0	0.947755	1	-4.34425	1.83731	-4.96391	0.000188743	0.00232892
GSBRNA2T00131169001	BnaC01g01230D	LK031789	4207387	4208811	+	0.499064	4.11633	0	0.982813	1	-0.0337396	4.11633	0	0.999916	1	1.65435	4.11633	3.28873	0.00340962	0.0251197
GSBRNA2T00131184001	BnaC01g01140D	LK031789	4259023	4262594	-	0.587676	9.02453	0	0.997016	1	-0.101841	9.02453	0	0.999995	1	0.0580191	9.02453	0	0.999997	1
GSBRNA2T00131186001	BnaC01g01120D	LK031789	4268968	4271573	+	0.197118	4.54725	0	0.999886	1	0.116444	4.54725	0	0.999964	1	0.330302	4.54725	0	0.999369	1
GSBRNA2T00131187001	BnaC01g01110D	LK031789	4271766	4274469	-	-0.198732	4.73422	0	0.99987	1	0.477308	4.73422	0	0.997381	1	0.164591	4.73422	0	0.9999	1
GSBRNA2T00131188001	BnaC01g01100D	LK031789	4274600	4276578	-	0.52856	2.60787	0	0.934249	1	0.173859	2.60787	0	0.996405	1	0.105037	2.60787	0	0.992931	1
GSBRNA2T00131189001	BnaC01g01090D	LK031789	4276909	4280103	-	-0.145157	3.21894	0	0.999706	1	-0.661149	3.21894	0	0.938457	1	-3.19785	3.21894	-5.424	8.92951e-05	0.00130036
GSBRNA2T00131190001	BnaC01g01080D	LK031789	4280562	4283590	-	-2.0346	2.41624	-3.58926	0.00198129	0.0669734	-0.508645	2.41624	0	0.88062	1	0.368359	2.41624	0	0.996143	1
GSBRNA2T00131193001	BnaC01g01070D	LK031789	4307681	4309256	+	7.78941	-0.346177	9.73782	3.567e-07	7.30707e-05	-0.138024	-0.346177	0	0.999696	1	0.471997	-0.346177	0	0.779746	1
GSBRNA2T00131194001	BnaC01g01060D	LK031789	4309850	4312787	+	-0.212856	1.39723	0	0.996837	1	-0.288663	1.39723	0	0.991352	1	-5.69372	1.39723	-6.04925	3.5531e-05	0.000640659
GSBRNA2T00131201001	BnaC01g01010D	LK031789	4338760	4340513	+	0.328959	3.41628	0	0.997547	1	-0.0265589	3.41628	0	0.999958	1	0.281626	3.41628	0	0.997477	1
GSBRNA2T00131202001	BnaC01g01000D	LK031789	4340624	4343724	-	-0.00466072	2.52091	0	0.999941	1	-0.0172847	2.52091	0	0.99978	1	-0.599631	2.52091	0	0.893357	1
GSBRNA2T00131203001	BnaC01g00990D	LK031789	4344856	4346287	-	-0.101052	2.74967	0	0.998457	1	-0.0837717	2.74967	0	0.998523	1	1.06192	2.74967	0.268924	0.396375	1
GSBRNA2T00131207001	BnaC01g00960D	LK031789	4355155	4356794	+	0.190471	7.81501	0	0.999991	1	-0.443842	7.81501	0	0.999737	1	-0.880282	7.81501	0	0.830274	1
GSBRNA2T00131209001	BnaC01g00950D	LK031789	4367444	4370897	+	-0.0678945	4.53905	0	0.999991	1	-0.160907	4.53905	0	0.999964	1	-0.0289534	4.53905	0	0.999995	1
GSBRNA2T00131210001	BnaC01g00940D	LK031789	4370971	4371814	+	-0.215028	3.32767	0	0.997233	1	-0.350087	3.32767	0	0.988105	1	-0.0801071	3.32767	0	0.998988	1
GSBRNA2T00131211001	BnaC01g00930D	LK031789	4372341	4372739	+	1.0251	1.2109	0.05951	0.477026	1	-0.251093	1.2109	0	0.972514	1	0.039421	1.2109	0	0.989408	1
GSBRNA2T00131212001	BnaC01g00920D	LK031789	4372819	4373606	-	0.652656	3.57279	0	0.925941	1	0.43737	3.57279	0	0.993273	1	0.987837	3.57279	0	0.520797	1
GSBRNA2T00131213001	BnaC01g00910D	LK031789	4373897	4375135	+	0.725853	7.90319	0	0.988388	1	-0.459179	7.90319	0	0.99987	1	-0.345106	7.90319	0	0.999967	1
GSBRNA2T00131215001	BnaC01g00890D	LK031789	4379292	4382360	+	0.287308	4.07087	0	0.998629	1	-0.789919	4.07087	0	0.844305	1	-1.36452	4.07087	-1.43814	0.0885127	0.402147
GSBRNA2T00131216001	BnaC01g00880D	LK031789	4383085	4386327	+	-2.60441	2.94576	-6.57686	1.60496e-05	0.00109256	0.225534	2.94576	0	0.988629	1	-0.732357	2.94576	0	0.918112	1
GSBRNA2T00131221001	BnaC01g00840D	LK031789	4400569	4403763	-	-0.270456	2.65921	0	0.992053	1	0.588253	2.65921	0	0.936986	1	-1.34796	2.65921	-0.95037	0.180747	0.726602
GSBRNA2T00131222001	BnaC01g00830D	LK031789	4405197	4407428	-	-0.559118	6.58576	0	0.995142	1	0.323831	6.58576	0	0.999724	1	-0.607453	6.58576	0	0.990221	1
GSBRNA2T00131224001	BnaC01g00820D	LK031789	4416294	4419247	-	0.177531	4.06287	0	0.999499	1	-0.182765	4.06287	0	0.999472	1	-0.28655	4.06287	0	0.996936	1
GSBRNA2T00131227001	BnaC01g00800D	LK031789	4427891	4429970	-	-0.251053	4.90707	0	0.997164	1	-0.273385	4.90707	0	0.995394	1	2.96388	4.90707	10.0009	2.54084e-07	2.14147e-05
GSBRNA2T00131229001	BnaC01g00790D	LK031789	4436454	4438465	-	-0.007338	3.07635	0	0.998988	1	-0.117865	3.07635	0	0.982746	1	2.60308	3.07635	4.76087	0.000260068	0.00301954
GSBRNA2T00131230001	BnaC01g00780D	LK031789	4440112	4442637	+	0.0751214	4.92736	0	0.999995	1	-0.249844	4.92736	0	0.999949	1	-0.061346	4.92736	0	0.999994	1
GSBRNA2T00131231001	BnaC01g00770D	LK031789	4443711	4445300	+	-0.708574	5.03147	0	0.965451	1	0.281573	5.03147	0	0.999777	1	-1.10162	5.03147	-0.640615	0.267159	0.992717
GSBRNA2T00131232001	BnaC01g00760D	LK031789	4445371	4447346	+	-0.391251	4.48591	0	0.998753	1	0.263191	4.48591	0	0.999673	1	-0.340666	4.48591	0	0.998967	1
GSBRNA2T00131233001	BnaC01g00750D	LK031789	4447560	4448351	-	-0.380504	5.29403	0	0.998944	1	0.545655	5.29403	0	0.993254	1	-0.235114	5.29403	0	0.99974	1
GSBRNA2T00131234001	BnaC01g00740D	LK031789	4448830	4450797	-	-0.037281	-0.0684665	0	0.994252	1	-1.78616	-0.0684665	-1.29181	0.111232	1	-5.69645	-0.0684665	-4.70936	0.000296432	0.00334179
GSBRNA2T00131235001	BnaC01g00730D	LK031789	4451343	4453108	-	-1.31889	4.52586	-1.34984	0.101509	1	0.350889	4.52586	0	0.988066	1	-0.625406	4.52586	0	0.934416	1
GSBRNA2T00131236001	BnaC01g00720D	LK031789	4454187	4455773	-	-1.27924	4.2198	-1.72512	0.0556116	1	-0.164648	4.2198	0	0.99968	1	-0.90986	4.2198	0	0.702204	1
GSBRNA2T00131240001	BnaC01g00680D	LK031789	4466685	4469607	+	0.703004	2.13796	0	0.69718	1	-0.410593	2.13796	0	0.863291	1	2.20392	2.13796	2.28005	0.0213047	0.120226
GSBRNA2T00131241001	BnaC01g00670D	LK031789	4473761	4476634	+	-0.137515	1.2118	0	0.982787	1	-0.154487	1.2118	0	0.976436	1	-0.591866	1.2118	0	0.801896	1
GSBRNA2T00131242001	BnaC01g00660D	LK031789	4480479	4481615	+	0.177013	1.81894	0	0.995201	1	0.143453	1.81894	0	0.997286	1	-2.98502	1.81894	-3.36093	0.00300375	0.0226268
GSBRNA2T00135353001	BnaA10g17370D	LK031790	14756	16911	+	-1.76018	2.27235	-2.45673	0.0154937	0.36738	-0.0793876	2.27235	0	0.991306	1	-2.98375	2.27235	-4.01027	0.000940064	0.00857118
GSBRNA2T00135354001	BnaA10g17380D	LK031790	17250	19845	+	-0.0435413	3.04599	0	0.999682	1	-0.036556	3.04599	0	0.999712	1	0.947878	3.04599	0	0.59443	1
GSBRNA2T00135356001	BnaA10g17400D	LK031790	20360	25835	-	-0.841352	3.57085	0	0.788746	1	0.761058	3.57085	0	0.881201	1	0.173676	3.57085	0	0.999724	1
GSBRNA2T00135359001	BnaA10g17420D	LK031790	33867	38188	+	0.401651	3.90236	0	0.99876	1	-0.19132	3.90236	0	0.999904	1	0.35068	3.90236	0	0.998916	1
GSBRNA2T00135360001	BnaA10g17430D	LK031790	42260	45224	+	0.334915	2.31605	0	0.987072	1	-0.412866	2.31605	0	0.976546	1	1.63314	2.31605	2.65783	0.010763	0.0666072
GSBRNA2T00135362001	BnaA10g17450D	LK031790	47122	48633	-	0.129244	2.57994	0	0.998524	1	-0.637274	2.57994	0	0.907277	1	-0.752356	2.57994	0	0.782831	1
GSBRNA2T00135375001	BnaA10g17560D	LK031790	81106	88988	-	-0.0247643	5.43855	0	0.999999	1	-0.0716499	5.43855	0	0.999996	1	-0.149702	5.43855	0	0.999986	1
GSBRNA2T00135376001	BnaA10g17570D	LK031790	91392	93080	+	0.12466	3.33022	0	0.999652	1	-0.37175	3.33022	0	0.995384	1	1.14342	3.33022	0.782826	0.224768	0.866261
GSBRNA2T00135377001	BnaA10g17580D	LK031790	93141	96369	-	-0.575446	2.69675	0	0.950249	1	0.285626	2.69675	0	0.993308	1	-0.617275	2.69675	0	0.913726	1
GSBRNA2T00135378001	BnaA10g17590D	LK031790	97127	103231	-	-0.390941	4.95677	0	0.999825	1	-0.037962	4.95677	0	0.999998	1	-1.1805	4.95677	-1.30507	0.108679	0.477464
GSBRNA2T00135379001	BnaA10g17600D	LK031790	104063	106603	-	0.249006	3.08202	0	0.996488	1	-0.181458	3.08202	0	0.998127	1	0.426858	3.08202	0	0.982111	1
GSBRNA2T00135380001	BnaA10g17610D	LK031790	107134	109494	-	1.4818	3.62974	2.36704	0.0182058	0.418261	0.0131976	3.62974	0	0.999993	1	0.70629	3.62974	0	0.886243	1
GSBRNA2T00135381001	BnaA10g17620D	LK031790	109879	111397	+	2.57494	1.37282	3.56527	0.00207062	0.0694098	0.194868	1.37282	0	0.996807	1	1.13342	1.37282	0.253379	0.403094	1
GSBRNA2T00135384001	BnaA10g17640D	LK031790	121183	123140	-	2.58872	0.295098	1.75163	0.0542344	1	-0.0262529	0.295098	0	0.990892	1	5.51458	0.295098	5.49589	8.23245e-05	0.00121436
GSBRNA2T00135386001	BnaA10g17660D	LK031790	126600	128830	+	0.267277	3.35748	0	0.997506	1	-0.130311	3.35748	0	0.999414	1	0.122505	3.35748	0	0.99882	1
GSBRNA2T00135388001	BnaA10g17680D	LK031790	131729	133584	+	0.0303373	2.05496	0	0.999065	1	0.344036	2.05496	0	0.983971	1	0.786058	2.05496	0	0.772029	1
GSBRNA2T00135389001	BnaA10g17690D	LK031790	134329	139688	+	0.0705992	5.32447	0	0.999994	1	-0.0359324	5.32447	0	0.999997	1	-0.0771597	5.32447	0	0.99999	1
GSBRNA2T00135391001	BnaA10g17710D	LK031790	145121	146528	-	-0.128427	3.86852	0	0.999927	1	-0.0195122	3.86852	0	0.99999	1	-0.345607	3.86852	0	0.998467	1
GSBRNA2T00135392001	BnaA10g17720D	LK031790	146850	151592	+	0.180824	3.94717	0	0.999712	1	0.271564	3.94717	0	0.999483	1	-0.768475	3.94717	0	0.846836	1
GSBRNA2T00135393001	BnaA10g17730D	LK031790	151771	165117	-	-0.202918	4.11686	0	0.999895	1	-0.386853	4.11686	0	0.998697	1	0.306462	4.11686	0	0.999672	1
GSBRNA2T00135394001	BnaA10g17740D	LK031790	165403	168642	-	0.621234	6.21064	0	0.994191	1	-0.208247	6.21064	0	0.999978	1	-0.92355	6.21064	0	0.705931	1
GSBRNA2T00135395001	BnaA10g17750D	LK031790	170229	173076	-	1.76196	4.29316	5.56736	7.12857e-05	0.00392901	-0.24201	4.29316	0	0.99997	1	-3.16472	4.29316	-6.57743	1.60538e-05	0.000349925
GSBRNA2T00135396001	BnaA10g17760D	LK031790	173956	180699	-	0.0155192	2.57802	0	0.999431	1	0.0969686	2.57802	0	0.996642	1	0.0595653	2.57802	0	0.996758	1
GSBRNA2T00135397001	BnaA10g17770D	LK031790	180795	182534	-	-2.26465	1.51573	-3.51196	0.0022774	0.0749781	-0.579279	1.51573	0	0.796127	1	1.19698	1.51573	0.975082	0.174784	0.707709
GSBRNA2T00135401001	BnaA10g17810D	LK031790	191782	197068	-	-1.08584	1.79647	-0.244883	0.405469	1	-0.405769	1.79647	0	0.905432	1	-1.25933	1.79647	-0.628748	0.270977	1
GSBRNA2T00135402001	BnaA10g17820D	LK031790	198842	204429	+	-0.00104543	4.28387	0	1	1	0.224908	4.28387	0	0.999908	1	0.226059	4.28387	0	0.999855	1
GSBRNA2T00135403001	BnaA10g17830D	LK031790	204516	205904	+	-0.0526539	3.31504	0	0.999835	1	0.655926	3.31504	0	0.95391	1	0.345971	3.31504	0	0.995975	1
GSBRNA2T00135404001	BnaA10g17840D	LK031790	206086	207786	+	-0.330445	2.32604	0	0.981868	1	0.180785	2.32604	0	0.993128	1	0.333184	2.32604	0	0.983719	1
GSBRNA2T00135408001	BnaA10g17870D	LK031790	214880	218281	-	-0.13921	3.48302	0	0.999252	1	-0.0830563	3.48302	0	0.999533	1	0.0127763	3.48302	0	0.99992	1
GSBRNA2T00135410001	BnaA10g17880D	LK031790	221492	224292	+	0.465178	2.74913	0	0.977452	1	-0.106328	2.74913	0	0.999223	1	-0.245797	2.74913	0	0.988852	1
GSBRNA2T00135411001	BnaA10g17890D	LK031790	229076	231243	-	0.112186	3.24086	0	0.999041	1	-0.390662	3.24086	0	0.987232	1	0.330367	3.24086	0	0.992028	1
GSBRNA2T00135412001	BnaA10g17900D	LK031790	234046	236267	-	-0.527236	3.07142	0	0.990266	1	0.585846	3.07142	0	0.982614	1	-2.67062	3.07142	-5.14961	0.000137818	0.00181872
GSBRNA2T00135415001	BnaA10g17910D	LK031790	245245	247928	+	0.934869	1.08805	0	0.55121	1	-0.210069	1.08805	0	0.961316	1	-2.37309	1.08805	-1.39874	0.0967381	0.433509
GSBRNA2T00135419001	BnaA10g17930D	LK031790	267579	268738	-	-0.345075	2.24573	0	0.979335	1	-0.305794	2.24573	0	0.975096	1	0.182598	2.24573	0	0.993338	1
GSBRNA2T00135421001	BnaA10g17950D	LK031790	275635	277382	-	-0.21413	4.52561	0	0.999143	1	0.0471963	4.52561	0	0.999877	1	0.253834	4.52561	0	0.99873	1
GSBRNA2T00135426001	BnaA10g17980D	LK031790	285651	287094	+	-0.710414	1.74338	0	0.720152	1	0.859927	1.74338	0	0.61323	1	2.07715	1.74338	3.03015	0.00546068	0.0374902
GSBRNA2T00135427001	BnaA10g17990D	LK031790	287919	288524	-	0.0888087	5.17848	0	0.999987	1	0.206504	5.17848	0	0.999951	1	0.221235	5.17848	0	0.99992	1
GSBRNA2T00135429001	BnaA10g18000D	LK031790	296814	298011	+	-0.402101	4.38403	0	0.998695	1	0.330693	4.38403	0	0.999398	1	-0.137625	4.38403	0	0.99991	1
GSBRNA2T00135430001	BnaA10g18010D	LK031790	298072	299598	-	0.193642	2.71164	0	0.991592	1	-0.431886	2.71164	0	0.955643	1	0.710672	2.71164	0	0.827116	1
GSBRNA2T00135431001	BnaA10g18020D	LK031790	300379	304597	-	-0.00596322	5.20578	0	1	1	0.0277623	5.20578	0	0.999999	1	-0.0968306	5.20578	0	0.999993	1
GSBRNA2T00135433001	BnaA10g18030D	LK031790	307727	315228	+	0.272026	5.08863	0	0.999907	1	-0.170901	5.08863	0	0.999973	1	-0.541541	5.08863	0	0.994983	1
GSBRNA2T00135436001	BnaA10g18050D	LK031790	322895	328804	-	0.640004	5.22039	0	0.989707	1	-0.205002	5.22039	0	0.999967	1	-0.270991	5.22039	0	0.999815	1
GSBRNA2T00135437001	BnaA10g18060D	LK031790	329173	333371	-	0.431183	4.04269	0	0.997109	1	-0.178678	4.04269	0	0.999841	1	0.154094	4.04269	0	0.99969	1
GSBRNA2T00135438001	BnaA10g18070D	LK031790	334028	334747	+	0.0905926	3.87261	0	0.998809	1	0.240517	3.87261	0	0.995943	1	-1.99189	3.87261	-2.53818	0.0133762	0.0804279
GSBRNA2T00135439001	BnaA10g18080D	LK031790	334839	338109	-	-0.221375	1.5535	0	0.965534	1	-0.217251	1.5535	0	0.959552	1	0.833554	1.5535	0	0.669771	1
GSBRNA2T00135440001	BnaA10g18090D	LK031790	339777	342594	-	0.0793745	3.71477	0	0.99989	1	0.435014	3.71477	0	0.996745	1	-0.472846	3.71477	0	0.985639	1
GSBRNA2T00135441001	BnaA10g18100D	LK031790	346516	348832	+	0.393265	3.96241	0	0.99415	1	-0.414692	3.96241	0	0.992809	1	0.172952	3.96241	0	0.998644	1
GSBRNA2T00135444001	BnaA10g18110D	LK031790	350639	352206	+	-1.01749	1.76627	-0.0453845	0.48241	1	-0.363483	1.76627	0	0.905598	1	1.00966	1.76627	0.0330543	0.487109	1
GSBRNA2T00135448001	BnaA10g18130D	LK031790	357014	359655	+	-0.841693	1.42755	0	0.632485	1	0.39253	1.42755	0	0.889315	1	0.676521	1.42755	0	0.795645	1
GSBRNA2T00135450001	BnaA10g18150D	LK031790	362722	366005	-	0.168375	5.31966	0	0.999962	1	0.174185	5.31966	0	0.999966	1	1.0546	5.31966	0.397798	0.349029	1
GSBRNA2T00135452001	BnaA10g18170D	LK031790	368646	370126	-	-0.68623	5.78703	0	0.919885	1	0.868369	5.78703	0	0.730715	1	0.687905	5.78703	0	0.926269	1
GSBRNA2T00135459001	BnaA10g18190D	LK031790	380172	382017	+	-0.216438	5.84273	0	0.999784	1	-0.361043	5.84273	0	0.998844	1	-0.705017	5.84273	0	0.946568	1
GSBRNA2T00135467001	BnaA10g18260D	LK031790	405663	409126	+	-0.0728999	5.5382	0	0.999994	1	0.0218581	5.5382	0	0.999998	1	-1.30578	5.5382	-2.05645	0.0315707	0.16766
GSBRNA2T00135468001	BnaA10g18270D	LK031790	409248	410376	-	-0.0777002	2.49646	0	0.994443	1	0.0696934	2.49646	0	0.995212	1	0.671239	2.49646	0	0.831482	1
GSBRNA2T00135469001	BnaA10g18280D	LK031790	410561	413382	+	-0.177598	5.60692	0	0.999988	1	0.0950127	5.60692	0	0.999996	1	-0.435986	5.60692	0	0.999571	1
GSBRNA2T00135475001	BnaA10g18320D	LK031790	431940	436120	-	1.65838	4.83646	4.28371	0.000582835	0.0239233	0.163263	4.83646	0	0.999977	1	0.203285	4.83646	0	0.999613	1
GSBRNA2T00135476001	BnaA10g18330D	LK031790	437390	440268	-	0.0287599	4.21214	0	0.999994	1	-0.316231	4.21214	0	0.999636	1	-2.51417	4.21214	-6.23414	2.62129e-05	0.000507823
GSBRNA2T00135478001	BnaA10g18340D	LK031790	452856	454980	-	-0.12948	4.29175	0	0.999935	1	0.102549	4.29175	0	0.999953	1	-0.189578	4.29175	0	0.999782	1
GSBRNA2T00135480001	BnaA10g18360D	LK031790	457711	458960	-	-0.0826072	5.49411	0	0.999644	1	-0.883823	5.49411	0	0.698005	1	-1.20617	5.49411	-0.894279	0.194745	0.772625
GSBRNA2T00135481001	BnaA10g18370D	LK031790	459052	459784	-	-0.408766	3.63991	0	0.996827	1	-0.678776	3.63991	0	0.930208	1	-1.0017	3.63991	-0.00801721	0.496871	1
GSBRNA2T00135482001	BnaA10g18380D	LK031790	463363	468176	+	0.455392	5.43913	0	0.999476	1	0.150655	5.43913	0	0.99999	1	-2.5166	5.43913	-8.42616	1.46396e-06	6.53657e-05
GSBRNA2T00135483001	BnaA10g18390D	LK031790	468295	469877	-	-0.0392603	2.71867	0	0.999541	1	0.380579	2.71867	0	0.989355	1	-0.300925	2.71867	0	0.986047	1
GSBRNA2T00135486001	BnaA10g18410D	LK031790	480862	483975	+	0.429443	4.07314	0	0.993675	1	0.315255	4.07314	0	0.99879	1	1.14319	4.07314	0.754116	0.232964	0.89233
GSBRNA2T00135489001	BnaA10g18440D	LK031790	493546	494097	-	1.57652	0.665286	1.15235	0.136412	1	-0.838148	0.665286	0	0.647341	1	-2.66815	0.665286	-1.62538	0.0676002	0.32046
GSBRNA2T00135491001	BnaA10g18460D	LK031790	506122	509220	-	0.314392	4.07141	0	0.999317	1	-0.0766053	4.07141	0	0.999963	1	0.278161	4.07141	0	0.999277	1
GSBRNA2T00135494001	BnaA10g18490D	LK031790	516424	518386	-	-0.178103	2.87926	0	0.998656	1	0.198073	2.87926	0	0.998414	1	-0.889555	2.87926	0	0.651933	1
GSBRNA2T00135495001	BnaA10g18500D	LK031790	520344	521788	+	-0.508658	5.98621	0	0.924329	1	-0.356956	5.98621	0	0.963621	1	-1.50588	5.98621	-1.46604	0.0847147	0.387999
GSBRNA2T00135496001	BnaA10g18510D	LK031790	522196	522678	+	-0.470461	2.56062	0	0.971088	1	0.462303	2.56062	0	0.972871	1	-0.207262	2.56062	0	0.994637	1
GSBRNA2T00135497001	BnaA10g18520D	LK031790	522794	523860	-	-0.538919	2.54841	0	0.958125	1	0.496905	2.54841	0	0.968787	1	-0.185811	2.54841	0	0.996624	1
GSBRNA2T00135498001	BnaA10g18530D	LK031790	529741	532554	+	-0.631364	3.32851	0	0.929169	1	0.352145	3.32851	0	0.989978	1	-0.0515591	3.32851	0	0.999586	1
GSBRNA2T00135499001	BnaA10g18540D	LK031790	533546	535971	-	0.192689	3.60498	0	0.999491	1	0.089839	3.60498	0	0.99988	1	0.501134	3.60498	0	0.988427	1
GSBRNA2T00135504001	BnaA10g18590D	LK031790	545954	547842	-	-1.04469	7.14452	-0.323549	0.376041	1	-0.0965224	7.14452	0	0.999983	1	-0.368908	7.14452	0	0.999652	1
GSBRNA2T00135505001	BnaA10g18600D	LK031790	549994	552022	-	1.76819	2.82676	3.22779	0.00380892	0.11621	-0.232026	2.82676	0	0.998337	1	-7.80076	2.82676	-6.06339	3.6634e-05	0.000655472
GSBRNA2T00135512001	BnaA10g18650D	LK031790	577299	581091	+	-0.306161	2.36135	0	0.973418	1	-0.17112	2.36135	0	0.985161	1	0.0804416	2.36135	0	0.994991	1
GSBRNA2T00135516001	BnaA10g18660D	LK031790	587633	591411	+	0.279027	4.3908	0	0.999813	1	-0.211309	4.3908	0	0.999918	1	-0.0817508	4.3908	0	0.99996	1
GSBRNA2T00135517001	BnaA10g18670D	LK031790	592915	602774	+	0.486748	5.16618	0	0.998394	1	-0.413384	5.16618	0	0.99939	1	-0.312037	5.16618	0	0.999642	1
GSBRNA2T00135519001	BnaA10g18690D	LK031790	610265	611523	+	0.524184	4.06298	0	0.982265	1	-0.079645	4.06298	0	0.999814	1	-2.19934	4.06298	-3.51453	0.00226671	0.0179198
GSBRNA2T00135520001	BnaA10g18700D	LK031790	611603	612970	+	0.411684	6.44493	0	0.999581	1	-0.0627616	6.44493	0	0.999995	1	-2.13517	6.44493	-7.40782	5.2026e-06	0.000162919
GSBRNA2T00135522001	BnaA10g18710D	LK031790	614802	617454	+	-0.377135	3.06254	0	0.996654	1	-0.204864	3.06254	0	0.99889	1	-0.412901	3.06254	0	0.992156	1
GSBRNA2T00135523001	BnaA10g18720D	LK031790	617886	619083	-	0.384247	2.51037	0	0.983214	1	0.14488	2.51037	0	0.998454	1	0.156335	2.51037	0	0.994476	1
GSBRNA2T00135524001	BnaA10g18730D	LK031790	619575	623605	+	0.542664	4.62534	0	0.996147	1	-0.648933	4.62534	0	0.984394	1	-0.000700611	4.62534	0	1	1
GSBRNA2T00135525001	BnaA10g18740D	LK031790	625568	628771	+	-0.462872	3.67732	0	0.968648	1	0.221924	3.67732	0	0.993617	1	-1.86201	3.67732	-2.29927	0.0205578	0.116565
GSBRNA2T00135527001	BnaA10g18750D	LK031790	631231	636542	+	0.161094	5.45077	0	0.99999	1	-0.0260804	5.45077	0	0.999999	1	0.0215677	5.45077	0	0.999999	1
GSBRNA2T00135528001	BnaA10g18760D	LK031790	636856	638584	-	-0.015003	1.54038	0	0.999205	1	-0.643473	1.54038	0	0.825194	1	-0.662873	1.54038	0	0.788603	1
GSBRNA2T00135529001	BnaA10g18770D	LK031790	640811	644419	+	-0.657372	3.37333	0	0.901602	1	0.853407	3.37333	0	0.71928	1	-1.39196	3.37333	-1.22205	0.123068	0.529873
GSBRNA2T00135530001	BnaA10g18780D	LK031790	644609	646190	-	0.1212	3.88588	0	0.99966	1	-0.500449	3.88588	0	0.98469	1	-0.821735	3.88588	0	0.764825	1
GSBRNA2T00135532001	BnaA10g18800D	LK031790	653306	654049	-	-0.485618	1.08414	0	0.875418	1	-0.0372979	1.08414	0	0.992528	1	0.210892	1.08414	0	0.966103	1
GSBRNA2T00135533001	BnaA10g18810D	LK031790	655744	657314	-	-0.916614	0.830134	0	0.572078	1	0.792711	0.830134	0	0.67143	1	-0.829573	0.830134	0	0.634463	1
GSBRNA2T00135540001	BnaA10g18870D	LK031790	692001	693250	+	0.251633	2.73346	0	0.987067	1	-0.0530047	2.73346	0	0.998402	1	2.3701	2.73346	5.39943	9.26351e-05	0.00133515
GSBRNA2T00135542001	BnaA10g18890D	LK031790	694426	700701	+	-0.0201983	2.92265	0	0.999604	1	0.0926935	2.92265	0	0.998235	1	0.555529	2.92265	0	0.941274	1
GSBRNA2T00135544001	BnaA10g18910D	LK031790	703318	704436	+	-0.271933	5.71661	0	0.99937	1	0.343888	5.71661	0	0.998707	1	0.0657253	5.71661	0	0.999936	1
GSBRNA2T00135546001	BnaA10g18930D	LK031790	707257	710349	-	-1.10914	0.734344	-0.223293	0.414163	1	1.30338	0.734344	0.633672	0.269581	1	-6.45071	0.734344	-4.65998	0.000329099	0.00363414
GSBRNA2T00135564001	BnaA10g19050D	LK031790	800759	802355	+	0.440763	3.10372	0	0.980152	1	-0.399224	3.10372	0	0.986208	1	0.772263	3.10372	0	0.812913	1
GSBRNA2T00135565001	BnaA10g19060D	LK031790	802555	805019	-	0.247578	2.41161	0	0.99642	1	-0.248379	2.41161	0	0.996387	1	-1.07167	2.41161	-0.215414	0.416634	1
GSBRNA2T00135566001	BnaA10g19070D	LK031790	806210	808639	-	-0.10978	6.66758	0	0.999964	1	0.354848	6.66758	0	0.999456	1	1.50888	6.66758	3.47202	0.00244675	0.0190571
GSBRNA2T00135567001	BnaA10g19080D	LK031790	809262	812340	+	0.0468715	1.99656	0	0.998879	1	-0.375446	1.99656	0	0.973359	1	0.511163	1.99656	0	0.948159	1
GSBRNA2T00135568001	BnaA10g19090D	LK031790	812802	815750	-	-0.551475	3.15127	0	0.898183	1	0.992296	3.15127	0	0.509555	1	1.45546	3.15127	1.6672	0.0612146	0.294544
GSBRNA2T00135570001	BnaA10g19110D	LK031790	823754	824565	-	-1.19714	1.08707	-0.457212	0.328164	1	0.329541	1.08707	0	0.913544	1	0.451866	1.08707	0	0.930928	1
GSBRNA2T00135571001	BnaA10g19120D	LK031790	829838	835106	+	0.112199	6.14235	0	0.999983	1	-0.0971865	6.14235	0	0.999986	1	0.250689	6.14235	0	0.999906	1
GSBRNA2T00135575001	BnaA10g19150D	LK031790	849546	851052	+	0.0313133	5.21348	0	0.999985	1	-0.0680267	5.21348	0	0.999965	1	0.855755	5.21348	0	0.810726	1
GSBRNA2T00135576001	BnaA10g19160D	LK031790	851105	853071	-	-0.0254428	4.58477	0	0.999995	1	-0.110774	4.58477	0	0.99997	1	0.506823	4.58477	0	0.997227	1
GSBRNA2T00135577001	BnaA10g19170D	LK031790	853270	855394	+	0.174337	1.99111	0	0.995334	1	0.0810714	1.99111	0	0.998626	1	0.230113	1.99111	0	0.989452	1
GSBRNA2T00135582001	BnaA10g19200D	LK031790	861781	865560	+	0.00763079	4.08056	0	0.999995	1	-0.217972	4.08056	0	0.999668	1	-0.0805233	4.08056	0	0.999897	1
GSBRNA2T00135583001	BnaA10g19210D	LK031790	865763	867501	-	-0.0315926	3.02784	0	0.999517	1	0.0286859	3.02784	0	0.999577	1	0.328498	3.02784	0	0.987658	1
GSBRNA2T00135584001	BnaA10g19220D	LK031790	867815	872606	+	-0.582468	1.81495	0	0.894222	1	0.124838	1.81495	0	0.991265	1	-0.205793	1.81495	0	0.985815	1
GSBRNA2T00135585001	BnaA10g19230D	LK031790	876549	879761	+	0.315011	3.70938	0	0.999051	1	-0.243903	3.70938	0	0.999576	1	0.427002	3.70938	0	0.99596	1
GSBRNA2T00135593001	BnaA10g19290D	LK031790	894953	896754	+	-0.188772	2.15959	0	0.993077	1	-0.0662061	2.15959	0	0.997565	1	-0.093688	2.15959	0	0.995699	1
GSBRNA2T00135594001	BnaA10g19300D	LK031790	896896	899266	+	0.260702	3.1809	0	0.998603	1	-0.150082	3.1809	0	0.999585	1	-0.106257	3.1809	0	0.999243	1
GSBRNA2T00135597001	BnaA10g19330D	LK031790	906695	909067	+	0.241033	4.46592	0	0.999877	1	-0.0602388	4.46592	0	0.999989	1	0.394401	4.46592	0	0.999095	1
GSBRNA2T00135599001	BnaA10g19350D	LK031790	912411	914305	+	0.305917	2.91953	0	0.9943	1	0.0275708	2.91953	0	0.999844	1	1.41884	2.91953	1.94184	0.0385141	0.19816
GSBRNA2T00135604001	BnaA10g19390D	LK031790	929759	930731	+	-1.10731	1.37453	-0.239502	0.40775	1	1.11258	1.37453	0.251253	0.403304	1	-0.542495	1.37453	0	0.842504	1
GSBRNA2T00135605001	BnaA10g19400D	LK031790	930867	932999	-	-0.0942935	3.41374	0	0.999956	1	-0.0965915	3.41374	0	0.999946	1	-0.887216	3.41374	0	0.712281	1
GSBRNA2T00135606001	BnaA10g19410D	LK031790	935038	935893	-	-0.0717803	1.97537	0	0.998226	1	0.205574	1.97537	0	0.994127	1	0.0897435	1.97537	0	0.996794	1
GSBRNA2T00135608001	BnaA10g19430D	LK031790	936112	942356	-	-0.187779	4.32506	0	0.999882	1	-0.0486777	4.32506	0	0.999978	1	0.0387971	4.32506	0	0.999981	1
GSBRNA2T00135609001	BnaA10g19440D	LK031790	943830	945173	+	-0.122948	4.94229	0	0.999968	1	0.284017	4.94229	0	0.999817	1	0.37502	4.94229	0	0.999427	1
GSBRNA2T00135610001	BnaA10g19450D	LK031790	945232	949185	-	0.427111	4.94183	0	0.985316	1	-0.486152	4.94183	0	0.976524	1	-3.01324	4.94183	-5.19903	0.000127434	0.00171233
GSBRNA2T00135611001	BnaA10g19460D	LK031790	952654	956630	+	-0.512513	4.20516	0	0.989284	1	0.553835	4.20516	0	0.984189	1	0.0254977	4.20516	0	0.999964	1
GSBRNA2T00135612001	BnaA10g19470D	LK031790	957893	961289	+	-0.148924	2.71652	0	0.997792	1	0.434439	2.71652	0	0.982804	1	-0.165355	2.71652	0	0.995742	1
GSBRNA2T00135614001	BnaA10g19490D	LK031790	966286	969502	+	0.202725	3.33256	0	0.998635	1	-0.345039	3.33256	0	0.994656	1	0.36518	3.33256	0	0.992712	1
GSBRNA2T00135616001	BnaA10g19510D	LK031790	972254	975826	-	-0.261275	4.09863	0	0.999896	1	-0.655581	4.09863	0	0.980335	1	-3.28335	4.09863	-8.59651	1.19862e-06	5.67236e-05
GSBRNA2T00135618001	BnaA10g19530D	LK031790	978982	979920	+	0.0976585	1.73034	0	0.989332	1	0.384293	1.73034	0	0.948698	1	0.254631	1.73034	0	0.960346	1
GSBRNA2T00135619001	BnaA10g19540D	LK031790	980319	982568	+	0.0546911	1.31106	0	0.993242	1	-0.49067	1.31106	0	0.876295	1	0.313168	1.31106	0	0.942728	1
GSBRNA2T00135620001	BnaA10g19550D	LK031790	982708	984543	-	-1.70167	0.0393605	-1.14603	0.137992	1	1.38427	0.0393605	0.607853	0.278975	1	-5.84535	0.0393605	-4.40428	0.000500605	0.00512157
GSBRNA2T00135622001	BnaA10g19570D	LK031790	988219	989916	+	-0.469779	2.48281	0	0.980513	1	-0.136497	2.48281	0	0.997911	1	0.0119264	2.48281	0	0.99991	1
GSBRNA2T00135625001	BnaA10g19590D	LK031790	995001	997084	+	0.394636	4.90934	0	0.999143	1	-0.152897	4.90934	0	0.999952	1	0.758137	4.90934	0	0.932701	1
GSBRNA2T00135627001	BnaA10g19600D	LK031790	997592	999183	-	-0.102534	5.24906	0	0.999984	1	0.110693	5.24906	0	0.999982	1	0.0942027	5.24906	0	0.999983	1
GSBRNA2T00135630001	BnaA10g19630D	LK031790	1006500	1007887	-	-0.853148	0.944478	0	0.629161	1	0.560546	0.944478	0	0.826387	1	-1.68634	0.944478	-1.20629	0.126236	0.541248
GSBRNA2T00135633001	BnaA10g19650D	LK031790	1012220	1013767	+	-0.0167411	4.36076	0	0.999997	1	0.210681	4.36076	0	0.99993	1	0.404155	4.36076	0	0.99918	1
GSBRNA2T00135634001	BnaA10g19660D	LK031790	1014386	1018514	+	0.28452	4.449	0	0.999055	1	-0.013008	4.449	0	0.999988	1	0.470633	4.449	0	0.992782	1
GSBRNA2T00135635001	BnaA10g19670D	LK031790	1018977	1020337	-	-0.217621	2.05777	0	0.998156	1	-0.14098	2.05777	0	0.998837	1	-8.07928	2.05777	-7.46022	5.26152e-06	0.000164299
GSBRNA2T00135637001	BnaA10g19680D	LK031790	1028757	1029680	+	-0.125854	3.75984	0	0.999938	1	-0.0824368	3.75984	0	0.999958	1	-0.763932	3.75984	0	0.884922	1
GSBRNA2T00135638001	BnaA10g19690D	LK031790	1031648	1032375	+	0.307149	1.06006	0	0.986635	1	-0.678776	1.06006	0	0.85085	1	-2.38574	1.06006	-2.70746	0.00984908	0.0617196
GSBRNA2T00135640001	BnaA10g19710D	LK031790	1036257	1037445	-	0.0494862	4.5386	0	0.999982	1	-0.0273521	4.5386	0	0.999991	1	0.557664	4.5386	0	0.992464	1
GSBRNA2T00135644001	BnaA10g19750D	LK031790	1045844	1048499	-	-0.500551	0.992922	0	0.827924	1	0.812121	0.992922	0	0.645215	1	1.27672	0.992922	0.643028	0.266514	0.99092
GSBRNA2T00135646001	BnaA10g19770D	LK031790	1086806	1090323	+	0.460023	3.86746	0	0.992981	1	-0.436511	3.86746	0	0.994491	1	0.0785635	3.86746	0	0.999687	1
GSBRNA2T00135647001	BnaA10g19780D	LK031790	1091032	1093845	-	0.100512	1.4485	0	0.989814	1	0.0150593	1.4485	0	0.998637	1	-2.64911	1.4485	-2.28039	0.0214211	0.12076
GSBRNA2T00135649001	BnaA10g19790D	LK031790	1095465	1097783	-	0.708237	1.73013	0	0.725866	1	0.395964	1.73013	0	0.928179	1	-0.375471	1.73013	0	0.856878	1
GSBRNA2T00135650001	BnaA10g19800D	LK031790	1098205	1102797	+	0.227247	4.7816	0	0.999885	1	-0.0723672	4.7816	0	0.999984	1	0.468155	4.7816	0	0.997876	1
GSBRNA2T00135651001	BnaA10g19810D	LK031790	1103011	1106930	+	-0.0210912	3.55075	0	0.999971	1	0.0119203	3.55075	0	0.999984	1	0.1232	3.55075	0	0.99969	1
GSBRNA2T00135652001	BnaA10g19820D	LK031790	1107149	1108590	+	0.102189	1.85261	0	0.996607	1	0.0796568	1.85261	0	0.997896	1	-0.152625	1.85261	0	0.989294	1
GSBRNA2T00135654001	BnaA10g19840D	LK031790	1113746	1116045	+	-0.127488	3.37923	0	0.998801	1	-0.11891	3.37923	0	0.998679	1	0.092911	3.37923	0	0.99895	1
GSBRNA2T00135655001	BnaA10g19850D	LK031790	1116202	1116858	-	0.133282	1.23032	0	0.980864	1	0.229478	1.23032	0	0.96954	1	0.670584	1.23032	0	0.784708	1
GSBRNA2T00135656001	BnaA10g19860D	LK031790	1117065	1119551	-	-0.328108	2.73879	0	0.990113	1	0.00963193	2.73879	0	0.99984	1	-0.634464	2.73879	0	0.884461	1
GSBRNA2T00135657001	BnaA10g19870D	LK031790	1119814	1121842	-	-0.15721	7.77686	0	0.999973	1	0.209299	7.77686	0	0.999951	1	0.116984	7.77686	0	0.999983	1
GSBRNA2T00135659001	BnaA10g19890D	LK031790	1126547	1127653	-	0.41429	1.99035	0	0.946049	1	0.568346	1.99035	0	0.922251	1	1.12717	1.99035	0.386803	0.352998	1
GSBRNA2T00135660001	BnaA10g19900D	LK031790	1128034	1129701	+	0.0891272	5.27877	0	0.999756	1	0.295545	5.27877	0	0.998282	1	0.441695	5.27877	0	0.992013	1
GSBRNA2T00135662001	BnaA10g19920D	LK031790	1133161	1135655	+	-0.385063	5.50934	0	0.9993	1	0.243321	5.50934	0	0.999856	1	-0.685465	5.50934	0	0.967073	1
GSBRNA2T00135664001	BnaA10g19930D	LK031790	1136549	1140738	-	-0.09249	4.56499	0	0.999912	1	-0.207616	4.56499	0	0.999622	1	-0.245383	4.56499	0	0.999249	1
GSBRNA2T00135667001	BnaA10g19960D	LK031790	1158577	1161626	-	0.094356	0.199306	0	0.961216	1	0.391817	0.199306	0	0.837963	1	3.76477	0.199306	5.03443	0.000166991	0.00212145
GSBRNA2T00135671001	BnaA10g19970D	LK031790	1169351	1172844	-	-0.82091	0.71249	0	0.612569	1	-0.378795	0.71249	0	0.831535	1	4.38508	0.71249	7.56733	4.26774e-06	0.000142623
GSBRNA2T00135673001	BnaA10g19990D	LK031790	1177968	1183165	+	0.0404887	6.28932	0	0.999994	1	-0.0218511	6.28932	0	0.999997	1	-1.21765	6.28932	-1.44246	0.0879134	0.399854
GSBRNA2T00135674001	BnaA10g20000D	LK031790	1184106	1185568	+	-0.0969039	3.39042	0	0.999813	1	-0.191904	3.39042	0	0.999334	1	-1.4169	3.39042	-1.59539	0.0688496	0.325546
GSBRNA2T00135675001	BnaA10g20010D	LK031790	1185786	1188831	-	-0.435791	4.50638	0	0.997955	1	0.325945	4.50638	0	0.999371	1	0.42135	4.50638	0	0.99862	1
GSBRNA2T00135677001	BnaA10g20030D	LK031790	1191451	1195134	-	-0.170674	5.07319	0	0.999945	1	-0.056801	5.07319	0	0.999987	1	-0.484556	5.07319	0	0.996874	1
GSBRNA2T00135678001	BnaA10g20040D	LK031790	1195796	1203942	-	0.435085	0.331427	0	0.941879	1	-0.462932	0.331427	0	0.932092	1	-3.32995	0.331427	-3.44299	0.00259909	0.0200426
GSBRNA2T00135680001	BnaA10g20050D	LK031790	1209629	1211556	+	0.375701	4.1759	0	0.999377	1	-0.00331532	4.1759	0	0.999999	1	-0.345322	4.1759	0	0.998745	1
GSBRNA2T00135683001	BnaA10g20060D	LK031790	1218573	1221736	-	-0.127526	2.7082	0	0.964445	1	1.1083	2.7082	0.235325	0.409397	1	4.94147	2.7082	10.0132	2.53796e-07	2.14147e-05
GSBRNA2T00135687001	BnaA10g20100D	LK031790	1229374	1230544	+	0.180875	1.97999	0	0.973363	1	0.0457781	1.97999	0	0.994498	1	2.97178	1.97999	6.05935	3.38966e-05	0.000616971
GSBRNA2T00135689001	BnaA10g20110D	LK031790	1236345	1237635	-	0.518627	4.02897	0	0.997186	1	-0.124813	4.02897	0	0.999983	1	-0.268225	4.02897	0	0.999537	1
GSBRNA2T00135691001	BnaA10g20130D	LK031790	1262268	1264770	-	0.154172	3.74742	0	0.999427	1	0.0297431	3.74742	0	0.999931	1	1.13661	3.74742	0.721222	0.242583	0.921488
GSBRNA2T00135694001	BnaA10g20160D	LK031790	1269119	1270433	+	-0.832603	4.76735	0	0.851704	1	-0.0543873	4.76735	0	0.999974	1	-2.14009	4.76735	-5.86977	4.49361e-05	0.000761996
GSBRNA2T00135696001	BnaA10g20180D	LK031790	1277768	1280249	-	0.39337	2.74375	0	0.954267	1	0.617676	2.74375	0	0.898987	1	2.02311	2.74375	3.47368	0.00243961	0.0190082
GSBRNA2T00135697001	BnaA10g20190D	LK031790	1280660	1282168	-	-1.04612	2.43847	-0.167135	0.435087	1	0.93169	2.43847	0	0.59472	1	-0.192107	2.43847	0	0.996009	1
GSBRNA2T00135698001	BnaA10g20200D	LK031790	1287223	1288181	+	-0.14752	4.42445	0	0.999708	1	0.38546	4.42445	0	0.997235	1	-0.410356	4.42445	0	0.993411	1
GSBRNA2T00135699001	BnaA10g20210D	LK031790	1290754	1291754	+	0.307529	1.19269	0	0.868313	1	3.61541	1.19269	4.96333	0.000187245	0.0654632	6.61124	1.19269	10.2772	1.98408e-07	1.83664e-05
GSBRNA2T00135700001	BnaA10g20220D	LK031790	1292169	1293835	-	0.19828	3.34245	0	0.999255	1	-0.0592763	3.34245	0	0.999879	1	0.856157	3.34245	0	0.766886	1
GSBRNA2T00135701001	BnaA10g20230D	LK031790	1294169	1298105	-	-0.588638	1.36452	0	0.849637	1	0.390409	1.36452	0	0.929292	1	-0.863251	1.36452	0	0.617974	1
GSBRNA2T00135703001	BnaA10g20240D	LK031790	1300929	1303096	+	-0.158696	3.39254	0	0.999709	1	0.269968	3.39254	0	0.999204	1	-0.153955	3.39254	0	0.999503	1
GSBRNA2T00135704001	BnaA10g20250D	LK031790	1303209	1306232	-	0.168421	4.81701	0	0.99997	1	-0.215502	4.81701	0	0.999948	1	0.224079	4.81701	0	0.999926	1
GSBRNA2T00135705001	BnaA10g20260D	LK031790	1306513	1309583	+	0.0112354	3.7195	0	0.99999	1	-0.131546	3.7195	0	0.999834	1	0.338365	3.7195	0	0.998532	1
GSBRNA2T00135706001	BnaA10g20270D	LK031790	1310738	1320930	+	-0.221955	5.86756	0	0.999774	1	0.0542602	5.86756	0	0.999971	1	-1.0679	5.86756	-0.393082	0.350721	1
GSBRNA2T00135708001	BnaA10g20290D	LK031790	1374536	1376477	+	-0.283336	3.64733	0	0.997074	1	0.40679	3.64733	0	0.992236	1	0.398044	3.64733	0	0.993061	1
GSBRNA2T00135710001	BnaA10g20310D	LK031790	1387701	1388833	+	0.229377	3.01617	0	0.998891	1	-0.345879	3.01617	0	0.996395	1	0.622974	3.01617	0	0.957214	1
GSBRNA2T00135712001	BnaA10g20330D	LK031790	1390589	1396453	+	-0.138704	5.16316	0	0.999978	1	0.0800792	5.16316	0	0.99999	1	-0.502443	5.16316	0	0.997302	1
GSBRNA2T00135714001	BnaA10g20350D	LK031790	1398293	1403012	-	0.0157861	3.96053	0	0.999995	1	-0.0329046	3.96053	0	0.999989	1	-0.658877	3.96053	0	0.957839	1
GSBRNA2T00135717001	BnaA10g20370D	LK031790	1409020	1410460	+	-0.548885	4.03293	0	0.99057	1	0.0606138	4.03293	0	0.999944	1	-0.657938	4.03293	0	0.958402	1
GSBRNA2T00135718001	BnaA10g20380D	LK031790	1420166	1421334	-	-0.327507	2.43505	0	0.977822	1	0.229384	2.43505	0	0.987792	1	0.872787	2.43505	0	0.677452	1
GSBRNA2T00135719001	BnaA10g20390D	LK031790	1421634	1423300	+	0.272389	3.32435	0	0.998354	1	-0.0616632	3.32435	0	0.999871	1	0.812403	3.32435	0	0.820068	1
GSBRNA2T00135720001	BnaA10g20400D	LK031790	1423892	1424980	+	0.114615	1.77763	0	0.996315	1	-0.657005	1.77763	0	0.853241	1	-4.90356	1.77763	-4.0699	0.000874169	0.00809041
GSBRNA2T00135722001	BnaA10g20410D	LK031790	1425360	1427513	-	-0.0785768	3.43121	0	0.999901	1	-0.519482	3.43121	0	0.985089	1	-0.140766	3.43121	0	0.999595	1
GSBRNA2T00135723001	BnaA10g20420D	LK031790	1432736	1434990	+	-0.0680213	8.81142	0	0.999997	1	0.102795	8.81142	0	0.999995	1	-2.24816	8.81142	-9.66545	3.61822e-07	2.59901e-05
GSBRNA2T00135724001	BnaA10g20430D	LK031790	1435231	1437148	+	-0.172028	3.39029	0	0.999267	1	0.214792	3.39029	0	0.998952	1	0.109941	3.39029	0	0.99951	1
GSBRNA2T00135725001	BnaA10g20440D	LK031790	1437684	1438375	-	0.114044	0.225065	0	0.991083	1	-2.24616	0.225065	-2.32023	0.0198328	1	-3.51938	0.225065	-3.28411	0.00348184	0.0255539
GSBRNA2T00135726001	BnaA10g20450D	LK031790	1439983	1442555	+	0.0152828	3.94245	0	0.999993	1	-0.00718627	3.94245	0	0.999997	1	0.484573	3.94245	0	0.996044	1
GSBRNA2T00135727001	BnaA10g20460D	LK031790	1443330	1445981	-	-0.363392	4.15473	0	0.997556	1	0.470706	4.15473	0	0.993354	1	0.535249	4.15473	0	0.989114	1
GSBRNA2T00135728001	BnaA10g20470D	LK031790	1446238	1449669	+	0.382335	4.9551	0	0.999364	1	-0.15321	4.9551	0	0.99996	1	0.583426	4.9551	0	0.99175	1
GSBRNA2T00135729001	BnaA10g20480D	LK031790	1449959	1450333	+	0.508012	2.30284	0	0.946262	1	-0.0195924	2.30284	0	0.999693	1	1.98479	2.30284	3.86268	0.00121652	0.0106111
GSBRNA2T00135731001	BnaA10g20500D	LK031790	1453704	1459095	+	0.159745	5.8543	0	0.999992	1	-0.0270327	5.8543	0	0.999999	1	-0.670707	5.8543	0	0.988098	1
GSBRNA2T00135734001	BnaA10g20530D	LK031790	1460155	1460857	+	-0.199718	6.06537	0	0.999976	1	0.296859	6.06537	0	0.999927	1	0.550003	6.06537	0	0.997936	1
GSBRNA2T00135735001	BnaA10g20540D	LK031790	1461002	1463801	-	0.126936	1.71281	0	0.993963	1	0.157468	1.71281	0	0.993874	1	0.00660088	1.71281	0	0.999506	1
GSBRNA2T00135736001	BnaA10g20550D	LK031790	1464983	1467388	+	0.184765	5.05404	0	0.999896	1	0.0515817	5.05404	0	0.999985	1	0.624337	5.05404	0	0.983866	1
GSBRNA2T00135737001	BnaA10g20560D	LK031790	1467458	1469048	-	0.474289	1.67366	0	0.929396	1	-0.606311	1.67366	0	0.862304	1	0.261534	1.67366	0	0.965973	1
GSBRNA2T00135738001	BnaA10g20570D	LK031790	1469548	1471989	-	0.0525067	2.09724	0	0.998616	1	-0.0927151	2.09724	0	0.997469	1	-0.061737	2.09724	0	0.997061	1
GSBRNA2T00135739001	BnaA10g20580D	LK031790	1474468	1477557	+	-0.804275	2.48157	0	0.7484	1	-0.37716	2.48157	0	0.956194	1	0.430649	2.48157	0	0.97862	1
GSBRNA2T00135741001	BnaA10g20600D	LK031790	1482883	1485770	-	-0.268157	1.87126	0	0.982372	1	0.313576	1.87126	0	0.977571	1	0.826607	1.87126	0	0.725341	1
GSBRNA2T00135742001	BnaA10g20610D	LK031790	1486302	1486766	+	1.52187	0.44609	0.777556	0.227725	1	-0.913946	0.44609	0	0.559306	1	3.60532	0.44609	4.33402	0.00053828	0.00543413
GSBRNA2T00135745001	BnaA10g20620D	LK031790	1492304	1495445	+	0.0303172	2.31275	0	0.995771	1	-0.922371	2.31275	0	0.562372	1	1.1633	2.31275	0.432019	0.336911	1
GSBRNA2T00135747001	BnaA10g20630D	LK031790	1501031	1501613	-	-0.867048	6.27448	0	0.738487	1	1.64818	6.27448	3.26457	0.0035626	0.47197	-0.17907	6.27448	0	0.999242	1
GSBRNA2T00135748001	BnaA10g20640D	LK031790	1503500	1503894	+	-0.28534	3.41138	0	0.987656	1	0.0103879	3.41138	0	0.999675	1	0.741084	3.41138	0	0.829549	1
GSBRNA2T00135749001	BnaA10g20650D	LK031790	1504781	1507465	+	0.368932	2.96962	0	0.977738	1	-0.178122	2.96962	0	0.995144	1	0.494627	2.96962	0	0.943299	1
GSBRNA2T00135750001	BnaA10g20660D	LK031790	1508790	1510708	-	0.0242407	3.42437	0	0.999642	1	-0.704623	3.42437	0	0.843143	1	1.26443	3.42437	1.12984	0.140771	0.5926
GSBRNA2T00135752001	BnaA10g20680D	LK031790	1519958	1522498	-	-0.702337	1.96863	0	0.791051	1	-0.0876541	1.96863	0	0.988439	1	1.54744	1.96863	2.02301	0.0334661	0.175889
GSBRNA2T00135754001	BnaA10g20700D	LK031790	1525921	1528085	-	-0.138716	4.29336	0	0.999869	1	0.193525	4.29336	0	0.999776	1	0.0944832	4.29336	0	0.999901	1
GSBRNA2T00135756001	BnaA10g20710D	LK031790	1531283	1532585	-	0.248052	5.01438	0	0.999833	1	-0.273995	5.01438	0	0.999776	1	-0.956111	5.01438	0	0.597539	1
GSBRNA2T00135758001	BnaA10g20720D	LK031790	1535496	1539451	-	-0.894627	0.896876	0	0.573019	1	1.02169	0.896876	0.0371615	0.48798	1	4.95724	0.896876	10.258	1.97253e-07	1.83362e-05
GSBRNA2T00135759001	BnaA10g20730D	LK031790	1540668	1542748	+	-0.266906	3.91059	0	0.999475	1	0.603526	3.91059	0	0.983759	1	0.306679	3.91059	0	0.999256	1
GSBRNA2T00135763001	BnaA10g20770D	LK031790	1547939	1550026	+	-0.315868	1.64087	0	0.969923	1	0.401982	1.64087	0	0.953828	1	0.49965	1.64087	0	0.931745	1
GSBRNA2T00135765001	BnaA10g20790D	LK031790	1551743	1553079	+	-0.0902903	2.019	0	0.998547	1	-0.0346812	2.019	0	0.999425	1	-0.997664	2.019	0	0.502705	1
GSBRNA2T00135767001	BnaA10g20810D	LK031790	1556877	1558833	+	-0.050247	4.80326	0	0.999991	1	0.203993	4.80326	0	0.999938	1	0.663919	4.80326	0	0.982471	1
GSBRNA2T00135768001	BnaA10g20820D	LK031790	1559199	1560686	-	-0.586598	1.03871	0	0.867429	1	0.131925	1.03871	0	0.985156	1	-0.400695	1.03871	0	0.932516	1
GSBRNA2T00135769001	BnaA10g20830D	LK031790	1562529	1563102	-	0.0916859	5.26776	0	0.999978	1	-0.184088	5.26776	0	0.999933	1	-2.12993	5.26776	-5.91698	4.18606e-05	0.000721842
GSBRNA2T00135770001	BnaA10g20840D	LK031790	1564664	1566640	-	0.213636	3.63053	0	0.999414	1	-0.482425	3.63053	0	0.990331	1	-0.0986129	3.63053	0	0.999613	1
GSBRNA2T00135772001	BnaA10g20850D	LK031790	1567183	1570430	-	0.0401483	3.2797	0	0.999936	1	-0.339184	3.2797	0	0.997381	1	-0.711796	3.2797	0	0.884909	1
GSBRNA2T00135773001	BnaA10g20860D	LK031790	1571604	1580384	+	0.105726	5.62161	0	0.999993	1	-0.182601	5.62161	0	0.999983	1	0.108839	5.62161	0	0.999992	1
GSBRNA2T00135781001	BnaA10g20920D	LK031790	1615986	1617761	-	0.0157561	3.71463	0	0.999991	1	-0.491644	3.71463	0	0.993415	1	0.00749248	3.71463	0	0.999993	1
GSBRNA2T00135782001	BnaA10g20930D	LK031790	1618825	1620918	-	-0.104383	2.70024	0	0.996992	1	0.208038	2.70024	0	0.993224	1	0.114048	2.70024	0	0.995675	1
GSBRNA2T00135788001	BnaA10g20960D	LK031790	1659022	1667473	+	-0.0827704	6.85015	0	0.999998	1	-0.0740328	6.85015	0	0.999998	1	-0.211367	6.85015	0	0.999989	1
GSBRNA2T00135790001	BnaA10g20980D	LK031790	1674537	1675615	+	-0.458868	4.0261	0	0.979833	1	-0.143307	4.0261	0	0.997927	1	-2.16875	4.0261	-3.39169	0.00282968	0.0215347
GSBRNA2T00135793001	BnaA10g20990D	LK031790	1694907	1700874	-	-0.129527	3.40862	0	0.99967	1	0.12618	3.40862	0	0.999682	1	-0.865419	3.40862	0	0.709671	1
GSBRNA2T00135794001	BnaA10g21000D	LK031790	1701088	1703411	-	0.0583246	3.81818	0	0.999958	1	-0.178906	3.81818	0	0.999787	1	0.273126	3.81818	0	0.999328	1
GSBRNA2T00135795001	BnaA10g21010D	LK031790	1704043	1705969	+	0.355959	2.31188	0	0.974403	1	0.302516	2.31188	0	0.988606	1	0.177425	2.31188	0	0.987139	1
GSBRNA2T00135796001	BnaA10g21020D	LK031790	1707802	1711917	+	0.405873	2.67175	0	0.989003	1	-0.331925	2.67175	0	0.99448	1	-0.0263364	2.67175	0	0.999553	1
GSBRNA2T00135797001	BnaA10g21030D	LK031790	1718057	1719129	+	0.0326921	3.47706	0	0.999885	1	-0.189258	3.47706	0	0.998875	1	0.650493	3.47706	0	0.944473	1
GSBRNA2T00135799001	BnaA10g21040D	LK031790	1719698	1721841	-	-0.271966	1.7312	0	0.975568	1	-0.0335499	1.7312	0	0.997295	1	-0.414665	1.7312	0	0.924796	1
GSBRNA2T00135801001	BnaA10g21060D	LK031790	1724113	1731248	-	0.216787	4.37609	0	0.999827	1	-0.195476	4.37609	0	0.999866	1	0.265547	4.37609	0	0.99959	1
GSBRNA2T00135806001	BnaA10g21110D	LK031790	1743180	1745785	-	0.387648	3.3626	0	0.995275	1	-0.341227	3.3626	0	0.997088	1	-0.403206	3.3626	0	0.985624	1
GSBRNA2T00135808001	BnaA10g21120D	LK031790	1747443	1750448	-	0.206088	3.94154	0	0.998691	1	-0.330868	3.94154	0	0.995691	1	0.0335123	3.94154	0	0.999761	1
GSBRNA2T00135809001	BnaA10g21130D	LK031790	1750543	1754636	-	0.0334928	4.95789	0	0.999988	1	-0.129673	4.95789	0	0.999939	1	-0.0545957	4.95789	0	0.999972	1
GSBRNA2T00135810001	BnaA10g21140D	LK031790	1755589	1757140	-	-0.277794	2.59714	0	0.987796	1	0.356233	2.59714	0	0.980562	1	-0.294001	2.59714	0	0.979574	1
GSBRNA2T00135811001	BnaA10g21150D	LK031790	1757408	1758991	+	-0.0588981	1.86897	0	0.997872	1	-0.0512643	1.86897	0	0.998003	1	-0.238956	1.86897	0	0.979014	1
GSBRNA2T00135813001	BnaA10g21170D	LK031790	1775109	1778339	+	-0.198015	2.59295	0	0.998884	1	-0.118776	2.59295	0	0.999304	1	-0.243475	2.59295	0	0.99689	1
GSBRNA2T00135814001	BnaA10g21180D	LK031790	1778937	1780135	-	-0.456486	4.59506	0	0.99881	1	0.273044	4.59506	0	0.999857	1	-0.05206	4.59506	0	0.999991	1
GSBRNA2T00135815001	BnaA10g21190D	LK031790	1780249	1781771	+	-0.109037	2.21335	0	0.993188	1	0.367359	2.21335	0	0.966237	1	1.04857	2.21335	0.163182	0.436613	1
GSBRNA2T00135817001	BnaA10g21200D	LK031790	1784895	1786264	+	0.0534388	1.40187	0	0.994835	1	-0.280434	1.40187	0	0.958879	1	-0.586591	1.40187	0	0.808956	1
GSBRNA2T00135819001	BnaA10g21220D	LK031790	1788890	1792603	-	-0.472872	3.10564	0	0.981993	1	0.273619	3.10564	0	0.996075	1	-0.271255	3.10564	0	0.9954	1
GSBRNA2T00135821001	BnaA10g21240D	LK031790	1794945	1795997	-	-0.448487	4.76375	0	0.997214	1	0.150328	4.76375	0	0.99987	1	-0.0512937	4.76375	0	0.99997	1
GSBRNA2T00135824001	BnaA10g21260D	LK031790	1807682	1811170	-	0.234507	5.37219	0	0.999949	1	-0.0385056	5.37219	0	0.999997	1	-0.422358	5.37219	0	0.999146	1
GSBRNA2T00135825001	BnaA10g21270D	LK031790	1811390	1815051	+	0.14555	4.91265	0	0.99999	1	-0.0437304	4.91265	0	0.999998	1	-0.497119	4.91265	0	0.998339	1
GSBRNA2T00135828001	BnaA10g21300D	LK031790	1822685	1824287	+	0.261935	3.93198	0	0.999815	1	-0.154319	3.93198	0	0.99995	1	-1.03366	3.93198	-0.173922	0.432474	1
GSBRNA2T00135834001	BnaA10g21350D	LK031790	1837489	1838242	-	0.0651542	3.60185	0	0.998411	1	-0.033982	3.60185	0	0.999193	1	0.762846	3.60185	0	0.802214	1
GSBRNA2T00135835001	BnaA10g21360D	LK031790	1841549	1842878	-	0.173316	2.27588	0	0.996502	1	0.0297003	2.27588	0	0.999628	1	0.889171	2.27588	0	0.667681	1
GSBRNA2T00135837001	BnaA10g21370D	LK031790	1847587	1852569	-	0.0116685	5.27436	0	1	1	-0.0103948	5.27436	0	1	1	-0.535922	5.27436	0	0.997802	1
GSBRNA2T00135838001	BnaA10g21380D	LK031790	1852971	1856515	+	-0.071844	3.33043	0	0.999812	1	-0.0279114	3.33043	0	0.999925	1	0.139578	3.33043	0	0.999403	1
GSBRNA2T00135839001	BnaA10g21390D	LK031790	1859816	1862684	+	-0.173334	2.28947	0	0.999199	1	-0.0188585	2.28947	0	0.999926	1	-1.64508	2.28947	-2.04829	0.032025	0.169726
GSBRNA2T00135840001	BnaA10g21400D	LK031790	1862851	1864633	-	-0.615424	2.83597	0	0.938624	1	0.248741	2.83597	0	0.995496	1	-0.52201	2.83597	0	0.959596	1
GSBRNA2T00135842001	BnaA10g21420D	LK031790	1867533	1869113	+	-0.0413389	4.24656	0	0.999981	1	0.0507958	4.24656	0	0.999976	1	-0.82321	4.24656	0	0.815591	1
GSBRNA2T00135844001	BnaA10g21440D	LK031790	1876171	1876899	-	0.185521	1.92452	0	0.997801	1	-0.105136	1.92452	0	0.999066	1	-6.06432	1.92452	-5.72819	5.8165e-05	0.000924788
GSBRNA2T00135846001	BnaA10g21450D	LK031790	1879989	1881298	-	0.188444	6.09033	0	0.999974	1	0.379835	6.09033	0	0.999767	1	0.164143	6.09033	0	0.999977	1
GSBRNA2T00135848001	BnaA10g21460D	LK031790	1884525	1890460	+	0.160427	5.48648	0	0.99997	1	-0.0660711	5.48648	0	0.999992	1	0.875328	5.48648	0	0.810592	1
GSBRNA2T00135850001	BnaA10g21470D	LK031790	1893308	1894609	+	0.770389	3.04373	0	0.775966	1	-0.506512	3.04373	0	0.948351	1	0.543049	3.04373	0	0.91036	1
GSBRNA2T00135851001	BnaA10g21480D	LK031790	1896135	1898265	-	-0.356971	4.04461	0	0.998733	1	0.179867	4.04461	0	0.999774	1	0.467168	4.04461	0	0.99667	1
GSBRNA2T00135852001	BnaA10g21490D	LK031790	1898398	1900350	-	-0.806463	2.3927	0	0.781109	1	0.73907	2.3927	0	0.847869	1	-0.840375	2.3927	0	0.715445	1
GSBRNA2T00135854001	BnaA10g21510D	LK031790	1901943	1903998	+	-0.263903	7.57654	0	0.999963	1	0.266358	7.57654	0	0.999962	1	-0.114041	7.57654	0	0.999994	1
GSBRNA2T00135855001	BnaA10g21520D	LK031790	1904329	1908867	+	-0.32491	6.27838	0	0.99988	1	0.207001	6.27838	0	0.99997	1	-0.14708	6.27838	0	0.999984	1
GSBRNA2T00135856001	BnaA10g21530D	LK031790	1911171	1913451	+	0.970259	6.72395	0	0.570879	1	-0.304856	6.72395	0	0.999472	1	0.219534	6.72395	0	0.999697	1
GSBRNA2T00135857001	BnaA10g21540D	LK031790	1913510	1917569	+	0.230665	2.60126	0	0.976027	1	0.143343	2.60126	0	0.990093	1	2.15513	2.60126	3.74743	0.00149305	0.0125541
GSBRNA2T00135860001	BnaA10g21560D	LK031790	1923557	1925163	+	0.321081	2.95899	0	0.980919	1	0.0282438	2.95899	0	0.999343	1	0.632537	2.95899	0	0.877822	1
GSBRNA2T00135861001	BnaA10g21570D	LK031790	1925374	1928666	-	-0.91921	0.490147	0	0.606356	1	-0.561858	0.490147	0	0.871511	1	-6.59939	0.490147	-7.21403	7.02982e-06	0.000200447
GSBRNA2T00135862001	BnaA10g21580D	LK031790	1931468	1933209	+	-1.07235	1.51001	-0.24937	0.403742	1	-0.682967	1.51001	0	0.78886	1	-0.541451	1.51001	0	0.930255	1
GSBRNA2T00135868001	BnaA10g21620D	LK031790	1942663	1946207	+	0.392272	2.86493	0	0.986584	1	-0.0437438	2.86493	0	0.999698	1	1.68032	2.86493	3.088	0.00491303	0.034228
GSBRNA2T00135871001	BnaA10g21640D	LK031790	1948433	1948762	-	0.182317	2.88486	0	0.998057	1	-0.481517	2.88486	0	0.975361	1	-5.64454	2.88486	-5.04158	0.000170714	0.00215883
GSBRNA2T00135873001	BnaA10g21660D	LK031790	1953343	1954842	-	-0.280053	3.10533	0	0.994774	1	0.575037	3.10533	0	0.956484	1	0.654578	3.10533	0	0.926877	1
GSBRNA2T00135879001	BnaA10g21710D	LK031790	1967951	1970994	+	0.49206	3.0291	0	0.979022	1	-0.505182	3.0291	0	0.976537	1	-0.0719836	3.0291	0	0.998725	1
GSBRNA2T00135884001	BnaA10g21740D	LK031790	1980033	1982586	+	0.156324	2.22252	0	0.996848	1	0.62895	2.22252	0	0.932497	1	-1.9368	2.22252	-2.08831	0.0298759	0.159888
GSBRNA2T00135885001	BnaA10g21750D	LK031790	1982891	1987519	-	0.465447	1.45553	0	0.955753	1	-0.0206824	1.45553	0	0.999607	1	-1.57585	1.45553	-1.23594	0.12063	0.521001
GSBRNA2T00135887001	BnaA10g21770D	LK031790	1998625	2002765	+	0.103416	4.32391	0	0.999974	1	-0.13546	4.32391	0	0.99996	1	0.0626527	4.32391	0	0.999976	1
GSBRNA2T00135888001	BnaA10g21780D	LK031790	2002879	2004881	+	-0.360765	3.09363	0	0.978117	1	0.147534	3.09363	0	0.994579	1	-0.809019	3.09363	0	0.709742	1
GSBRNA2T00135892001	BnaA10g21820D	LK031790	2023024	2023455	+	-1.10709	2.39283	-0.332756	0.372667	1	0.677296	2.39283	0	0.822783	1	-2.99877	2.39283	-3.40317	0.00278253	0.0212351
GSBRNA2T00135894001	BnaA10g21840D	LK031790	2029084	2031732	+	0.00220157	1.73125	0	0.999967	1	0.206031	1.73125	0	0.996334	1	-5.50984	1.73125	-5.2054	0.000130502	0.00174614
GSBRNA2T00135895001	BnaA10g21850D	LK031790	2032897	2046870	+	0.451907	0.72983	0	0.925377	1	-0.330333	0.72983	0	0.962718	1	-2.04831	0.72983	-1.73682	0.054699	0.267321
GSBRNA2T00135897001	BnaA10g21870D	LK031790	2049890	2050514	+	-0.528139	4.68933	0	0.88306	1	0.752968	4.68933	0	0.740346	1	-0.596459	4.68933	0	0.832628	1
GSBRNA2T00135898001	BnaA10g21880D	LK031790	2051289	2051699	+	-0.668853	2.15263	0	0.834981	1	0.545516	2.15263	0	0.902524	1	-0.525174	2.15263	0	0.89909	1
GSBRNA2T00135899001	BnaA10g21890D	LK031790	2051926	2052726	-	-0.803401	1.94065	0	0.65287	1	1.03932	1.94065	0.0820908	0.468602	1	2.74739	1.94065	5.17788	0.000131727	0.00175932
GSBRNA2T00135900001	BnaA10g21900D	LK031790	2053327	2058910	-	0.27389	4.26457	0	0.999385	1	-0.241983	4.26457	0	0.999567	1	-0.229035	4.26457	0	0.999118	1
GSBRNA2T00135901001	BnaA10g21910D	LK031790	2059700	2061325	+	-0.53914	6.20225	0	0.996861	1	0.517374	6.20225	0	0.997637	1	-0.164335	6.20225	0	0.999966	1
GSBRNA2T00135902001	BnaA10g21920D	LK031790	2061380	2062364	-	-0.151637	5.33469	0	0.999939	1	0.197533	5.33469	0	0.999901	1	-0.328233	5.33469	0	0.999407	1
GSBRNA2T00135904001	BnaA10g21940D	LK031790	2071855	2072571	+	-0.781714	1.89694	0	0.774308	1	0.521917	1.89694	0	0.937901	1	-1.75801	1.89694	-1.90463	0.041066	0.20939
GSBRNA2T00135906001	BnaA10g21960D	LK031790	2074362	2075557	-	-0.0158306	2.35099	0	0.999605	1	0.487429	2.35099	0	0.964282	1	-0.548124	2.35099	0	0.89524	1
GSBRNA2T00135908001	BnaA10g21980D	LK031790	2090387	2093133	+	-0.200785	4.22361	0	0.999924	1	0.099202	4.22361	0	0.999975	1	0.478636	4.22361	0	0.998257	1
GSBRNA2T00135910001	BnaA10g21990D	LK031790	2093402	2095030	-	0.0739497	2.67303	0	0.999557	1	0.1118	2.67303	0	0.999417	1	0.373534	2.67303	0	0.991237	1
GSBRNA2T00135915001	BnaA10g22040D	LK031790	2106888	2109762	-	-0.467514	5.65058	0	0.999649	1	-0.0425323	5.65058	0	0.999999	1	-1.02034	5.65058	-0.164513	0.436091	1
GSBRNA2T00135921001	BnaA10g22080D	LK031790	2129817	2134397	+	0.260108	5.36166	0	0.999365	1	-0.317132	5.36166	0	0.99885	1	-0.055913	5.36166	0	0.999917	1
GSBRNA2T00135927001	BnaA10g22110D	LK031790	2158047	2160533	-	0.406227	3.82717	0	0.998329	1	-0.327493	3.82717	0	0.999341	1	-1.77582	3.82717	-3.0926	0.00487205	0.0339761
GSBRNA2T00135928001	BnaA10g22120D	LK031790	2160908	2162774	+	0.777137	3.23664	0	0.79129	1	0.236567	3.23664	0	0.997109	1	0.752096	3.23664	0	0.801398	1
GSBRNA2T00135930001	BnaA10g22140D	LK031790	2164150	2164416	-	-0.92568	1.67435	0	0.561226	1	2.84123	1.67435	2.34288	0.0192224	1	3.62945	1.67435	4.32291	0.000548822	0.00552292
GSBRNA2T00135931001	BnaA10g22150D	LK031790	2167729	2170253	+	-0.945302	3.47243	0	0.620582	1	-0.0351923	3.47243	0	0.999933	1	-3.16974	3.47243	-6.63398	1.48277e-05	0.000331864
GSBRNA2T00135932001	BnaA10g22160D	LK031790	2173188	2176868	-	-0.283689	4.26367	0	0.999661	1	-0.189557	4.26367	0	0.999844	1	-2.63416	4.26367	-6.48995	1.81497e-05	0.000383519
GSBRNA2T00135933001	BnaA10g22170D	LK031790	2178044	2181672	-	-0.232437	4.32292	0	0.999896	1	-0.108384	4.32292	0	0.999968	1	-0.14088	4.32292	0	0.999945	1
GSBRNA2T00135936001	BnaA10g22190D	LK031790	2183669	2184915	+	-0.18235	2.62864	0	0.994923	1	0.00451657	2.62864	0	0.99989	1	-0.128579	2.62864	0	0.995193	1
GSBRNA2T00135939001	BnaA10g22220D	LK031790	2191072	2192870	-	2.43205	0.80298	4.06611	0.000850697	0.0331352	-4.88237	0.80298	-5.74482	5.53452e-05	0.0280879	-2.78427	0.80298	-2.10367	0.0294951	0.158155
GSBRNA2T00135940001	BnaA10g22230D	LK031790	2196606	2197837	-	0.0238235	1.46761	0	0.998388	1	-0.924892	1.46761	0	0.572902	1	1.50348	1.46761	1.70318	0.0576787	0.279843
GSBRNA2T00135943001	BnaA10g22260D	LK031790	2203264	2204609	-	-0.208681	2.12948	0	0.994322	1	-0.300677	2.12948	0	0.983994	1	0.162047	2.12948	0	0.995617	1
GSBRNA2T00135944001	BnaA10g22270D	LK031790	2204922	2207573	+	-0.0319768	5.55866	0	0.999995	1	0.181458	5.55866	0	0.999957	1	-0.120188	5.55866	0	0.99997	1
GSBRNA2T00135945001	BnaA10g22280D	LK031790	2208060	2210265	-	7.43962	-0.598751	6.97467	9.89892e-06	0.000731231	-0.421104	-0.598751	0	0.967002	1	0.471997	-0.598751	0	0.792872	1
GSBRNA2T00135946001	BnaA10g22290D	LK031790	2211083	2214527	+	0.294676	3.95884	0	0.998627	1	-0.430157	3.95884	0	0.994416	1	0.946414	3.95884	0	0.612222	1
GSBRNA2T00135948001	BnaA10g22310D	LK031790	2218791	2220518	+	0.198	3.67972	0	0.999472	1	-0.0857539	3.67972	0	0.999867	1	0.275872	3.67972	0	0.99839	1
GSBRNA2T00135950001	BnaA10g22320D	LK031790	2223179	2226101	-	-0.424382	1.38789	0	0.926396	1	-0.163553	1.38789	0	0.975437	1	-0.629916	1.38789	0	0.797842	1
GSBRNA2T00135951001	BnaA10g22330D	LK031790	2226281	2227407	+	1.39628	2.59117	1.60409	0.0678815	1	0.362159	2.59117	0	0.997881	1	0.710386	2.59117	0	0.836471	1
GSBRNA2T00135952001	BnaA10g22340D	LK031790	2227991	2230270	-	0.881185	7.92307	0	0.847389	1	-0.0377098	7.92307	0	1	1	-0.424096	7.92307	0	0.999833	1
GSBRNA2T00135954001	BnaA10g22360D	LK031790	2236935	2238723	+	-0.196555	1.71356	0	0.983052	1	0.0733515	1.71356	0	0.994105	1	0.935338	1.71356	0	0.580362	1
GSBRNA2T00135959001	BnaA10g22400D	LK031790	2251825	2254278	+	0.874373	3.6481	0	0.766657	1	0.0539565	3.6481	0	0.999987	1	-0.112327	3.6481	0	0.999603	1
GSBRNA2T00135961001	BnaA10g22420D	LK031790	2258126	2261516	+	-0.198486	1.39073	0	0.960408	1	0.279682	1.39073	0	0.941888	1	0.284619	1.39073	0	0.938723	1
GSBRNA2T00135962001	BnaA10g22430D	LK031790	2261575	2264578	+	-0.874302	3.86364	0	0.684229	1	0.904729	3.86364	0	0.642999	1	1.25717	3.86364	1.2275	0.122073	0.526379
GSBRNA2T00135965001	BnaA10g22450D	LK031790	2273368	2274981	+	0.450593	6.15631	0	0.999661	1	0.575734	6.15631	0	0.998266	1	0.661632	6.15631	0	0.991825	1
GSBRNA2T00135966001	BnaA10g22460D	LK031790	2275966	2277647	-	1.5911	4.97344	3.70754	0.00160297	0.055849	0.308436	4.97344	0	0.999817	1	0.340843	4.97344	0	0.998332	1
GSBRNA2T00135967001	BnaA10g22470D	LK031790	2278065	2279354	-	-0.529497	2.81962	0	0.964454	1	0.0591615	2.81962	0	0.99915	1	0.475087	2.81962	0	0.982743	1
GSBRNA2T00135969001	BnaA10g22490D	LK031790	2282070	2283936	+	0.247388	3.33601	0	0.999113	1	0.156574	3.33601	0	0.999735	1	-3.84074	3.33601	-5.63821	6.42912e-05	0.000997192
GSBRNA2T00135973001	BnaA10g22500D	LK031790	2286849	2287107	+	-0.075091	4.38652	0	0.999966	1	-0.532959	4.38652	0	0.992168	1	-2.08538	4.38652	-4.78939	0.000247943	0.00290546
GSBRNA2T00135974001	BnaA10g22510D	LK031790	2287447	2288959	+	-0.0812092	6.47316	0	0.999992	1	-0.340039	6.47316	0	0.999806	1	-2.31431	6.47316	-8.72453	1.03131e-06	5.05447e-05
GSBRNA2T00135976001	BnaA10g22530D	LK031790	2291996	2293284	-	-0.506476	4.4397	0	0.907666	1	0.544922	4.4397	0	0.891077	1	3.92585	4.4397	10.4441	1.61978e-07	1.61885e-05
GSBRNA2T00135979001	BnaA10g22550D	LK031790	2299737	2303269	-	-0.238087	2.86432	0	0.984567	1	0.333496	2.86432	0	0.973559	1	0.125215	2.86432	0	0.992783	1
GSBRNA2T00135980001	BnaA10g22560D	LK031790	2304721	2309733	-	0.527129	4.43799	0	0.997085	1	-0.0499184	4.43799	0	0.999995	1	0.0781306	4.43799	0	0.999972	1
GSBRNA2T00135981001	BnaA10g22570D	LK031790	2310100	2312249	-	-0.0421092	4.35981	0	0.999992	1	0.0272542	4.35981	0	0.999995	1	-0.0852426	4.35981	0	0.99997	1
GSBRNA2T00135982001	BnaA10g22580D	LK031790	2312545	2314666	+	-0.692325	1.07465	0	0.734528	1	-0.590678	1.07465	0	0.761958	1	0.197242	1.07465	0	0.960922	1
GSBRNA2T00135984001	BnaA10g22600D	LK031790	2323333	2326098	+	1.07292	5.06812	0.526668	0.304212	1	-0.272958	5.06812	0	0.999922	1	-0.55049	5.06812	0	0.991064	1
GSBRNA2T00135985001	BnaA10g22610D	LK031790	2326355	2329643	+	1.49669	2.95966	1.8153	0.0478001	0.90542	0.191375	2.95966	0	0.999093	1	1.09688	2.95966	0.324494	0.375701	1
GSBRNA2T00135986001	BnaA10g22620D	LK031790	2330191	2331035	+	3.22463	0.965675	4.73223	0.000273382	0.0124836	0.362347	0.965675	0	0.993545	1	-1.22267	0.965675	-0.28273	0.399181	1
GSBRNA2T00135990001	BnaA10g22650D	LK031790	2334158	2336244	-	3.17187	2.73546	6.58646	1.58513e-05	0.00108311	0.00879095	2.73546	0	0.999994	1	0.71344	2.73546	0	0.748121	1
GSBRNA2T00135991001	BnaA10g22660D	LK031790	2336482	2337558	+	1.21512	0.564242	0.347455	0.369283	1	0.706675	0.564242	0	0.739651	1	-0.138858	0.564242	0	0.939421	1
GSBRNA2T00135992001	BnaA10g22670D	LK031790	2339126	2341713	-	0.717345	5.32777	0	0.907825	1	-1.18224	5.32777	-0.889461	0.195983	1	-1.14657	5.32777	-0.625796	0.27183	1
GSBRNA2T00135993001	BnaA10g22680D	LK031790	2351564	2352645	+	2.20071	2.23014	1.99112	0.0354781	0.716203	1.64227	2.23014	1.99175	0.0353345	1	5.39744	2.23014	7.98248	2.55987e-06	9.99726e-05
GSBRNA2T00135997001	BnaA10g22720D	LK031790	2357432	2358315	+	1.20354	1.44575	0.584576	0.28508	1	0.182371	1.44575	0	0.995587	1	0.330521	1.44575	0	0.935069	1
GSBRNA2T00135999001	BnaA10g22730D	LK031790	2360714	2363118	-	0.469636	4.17148	0	0.995183	1	-0.0860912	4.17148	0	0.999941	1	-1.12178	4.17148	-0.534923	0.301443	1
GSBRNA2T00136000001	BnaA10g22740D	LK031790	2363722	2366224	+	0.0875062	2.88942	0	0.999505	1	0.0588784	2.88942	0	0.999726	1	-0.467488	2.88942	0	0.967909	1
GSBRNA2T00136002001	BnaA10g22760D	LK031790	2369359	2373199	+	-1.90792	1.72456	-2.63268	0.0112677	0.280727	-0.391694	1.72456	0	0.898681	1	-0.208052	1.72456	0	0.994984	1
GSBRNA2T00136003001	BnaA10g22770D	LK031790	2377802	2380488	-	-2.83243	5.12962	-12.2681	2.9182e-08	2.37598e-05	0.109805	5.12962	0	0.999893	1	0.139852	5.12962	0	0.999992	1
GSBRNA2T00136005001	BnaA10g22780D	LK031790	2380996	2383681	+	-0.640172	6.30528	0	0.988955	1	0.259876	6.30528	0	0.999907	1	0.135824	6.30528	0	0.999981	1
GSBRNA2T00136006001	BnaA10g22790D	LK031790	2383933	2386810	-	1.22704	3.10952	0.733151	0.239074	1	-0.311329	3.10952	0	0.98869	1	0.844949	3.10952	0	0.671895	1
GSBRNA2T00136009001	BnaA10g22810D	LK031790	2393105	2397330	+	-0.163655	2.77625	0	0.998337	1	-0.0427507	2.77625	0	0.999584	1	-0.157104	2.77625	0	0.997343	1
GSBRNA2T00136011001	BnaA10g22830D	LK031790	2398295	2399169	+	-0.94894	0.851177	0	0.538817	1	0.50369	0.851177	0	0.810911	1	-0.0259659	0.851177	0	0.993657	1
GSBRNA2T00136012001	BnaA10g22840D	LK031790	2399316	2407323	-	0.328003	4.87689	0	0.999231	1	-0.0605391	4.87689	0	0.99997	1	-0.596726	4.87689	0	0.97451	1
GSBRNA2T00136014001	BnaA10g22850D	LK031790	2409866	2412349	-	-0.131524	5.20849	0	0.999973	1	-0.0787989	5.20849	0	0.999985	1	0.817812	5.20849	0	0.893966	1
GSBRNA2T00136015001	BnaA10g22860D	LK031790	2412729	2414815	+	-0.0087739	2.78679	0	0.999862	1	-0.268746	2.78679	0	0.991131	1	-0.466685	2.78679	0	0.947393	1
GSBRNA2T00136016001	BnaA10g22870D	LK031790	2414891	2417359	-	-1.09301	4.84307	-0.47258	0.322674	1	0.641938	4.84307	0	0.949162	1	0.356687	4.84307	0	0.99789	1
GSBRNA2T00136017001	BnaA10g22880D	LK031790	2418868	2422155	+	0.143672	4.33039	0	0.999333	1	-0.18173	4.33039	0	0.999009	1	-0.265992	4.33039	0	0.996153	1
GSBRNA2T00136018001	BnaA10g22890D	LK031790	2422682	2426947	+	0.102572	3.95094	0	0.999543	1	-0.107858	3.95094	0	0.999509	1	-0.0213539	3.95094	0	0.999853	1
GSBRNA2T00136019001	BnaA10g22900D	LK031790	2427056	2428716	-	0.0619969	3.23326	0	0.999675	1	0.0341154	3.23326	0	0.999845	1	0.0978901	3.23326	0	0.999125	1
GSBRNA2T00136020001	BnaA10g22910D	LK031790	2429131	2430668	-	1.42307	1.19266	0.922332	0.187754	1	-0.341078	1.19266	0	0.951141	1	1.61614	1.19266	1.29526	0.110382	0.483774
GSBRNA2T00136021001	BnaA10g22920D	LK031790	2430806	2433217	+	-0.398938	5.72548	0	0.999672	1	0.143238	5.72548	0	0.999984	1	0.225235	5.72548	0	0.999963	1
GSBRNA2T00136022001	BnaA10g22930D	LK031790	2434513	2436580	+	0.631236	2.76681	0	0.9165	1	-0.190406	2.76681	0	0.997706	1	-1.11447	2.76681	-0.303883	0.383386	1
GSBRNA2T00136028001	BnaA10g22970D	LK031790	2442566	2445389	-	-0.168895	4.36421	0	0.999278	1	-0.00882502	4.36421	0	0.99997	1	-0.273092	4.36421	0	0.99704	1
GSBRNA2T00136031001	BnaA10g22990D	LK031790	2448293	2455123	-	0.125919	3.57767	0	0.999873	1	-0.0753812	3.57767	0	0.999939	1	-0.026795	3.57767	0	0.999955	1
GSBRNA2T00136034001	BnaA10g23020D	LK031790	2458856	2460664	+	0.134839	2.30396	0	0.994844	1	-0.294278	2.30396	0	0.980968	1	1.01736	2.30396	0.0621956	0.475744	1
GSBRNA2T00136035001	BnaA10g23030D	LK031790	2460760	2462724	+	-0.167044	2.87444	0	0.99795	1	-0.270015	2.87444	0	0.993122	1	0.00544444	2.87444	0	0.999926	1
GSBRNA2T00136037001	BnaA10g23040D	LK031790	2465254	2470167	-	-0.152858	3.46097	0	0.998315	1	0.0318996	3.46097	0	0.999693	1	-0.136134	3.46097	0	0.997708	1
GSBRNA2T00136040001	BnaA10g23060D	LK031790	2474139	2476560	-	-0.0178254	4.96542	0	0.999999	1	0.143086	4.96542	0	0.999989	1	0.216001	4.96542	0	0.999967	1
GSBRNA2T00136041001	BnaA10g23070D	LK031790	2477558	2478399	-	0.238071	4.84282	0	0.999918	1	0.164012	4.84282	0	0.999973	1	0.315426	4.84282	0	0.999743	1
GSBRNA2T00136042001	BnaA10g23080D	LK031790	2478680	2480645	+	-0.276405	2.08305	0	0.978073	1	0.62979	2.08305	0	0.873799	1	0.514562	2.08305	0	0.929926	1
GSBRNA2T00136043001	BnaA10g23090D	LK031790	2480708	2482272	-	0.0462506	1.95684	0	0.998827	1	-0.00219061	1.95684	0	0.999948	1	0.201798	1.95684	0	0.990967	1
GSBRNA2T00136045001	BnaA10g23100D	LK031790	2482929	2487158	-	-0.353476	5.22011	0	0.999237	1	0.305691	5.22011	0	0.999541	1	2.26224	5.22011	8.85136	8.91088e-07	4.62237e-05
GSBRNA2T00136047001	BnaA10g23120D	LK031790	2492819	2493965	+	-0.563615	0.263725	0	0.778062	1	0.0341126	0.263725	0	0.988253	1	3.11703	0.263725	5.13824	0.000140545	0.0018481
GSBRNA2T00136048001	BnaA10g23130D	LK031790	2495638	2496728	+	0.0168488	2.4255	0	0.999568	1	0.26574	2.4255	0	0.991244	1	0.891562	2.4255	0	0.655502	1
GSBRNA2T00136050001	BnaA10g23140D	LK031790	2497342	2503106	+	0.104314	5.55188	0	0.999818	1	-0.485496	5.55188	0	0.990838	1	-0.035729	5.55188	0	0.999931	1
GSBRNA2T00136052001	BnaA10g23150D	LK031790	2505393	2507937	-	0.226072	3.34301	0	0.999425	1	-0.190984	3.34301	0	0.999611	1	0.206289	3.34301	0	0.999203	1
GSBRNA2T00136053001	BnaA10g23160D	LK031790	2509203	2510367	-	0.517537	3.24477	0	0.973628	1	-0.00295646	3.24477	0	0.99999	1	1.05447	3.24477	0.244772	0.405472	1
GSBRNA2T00136054001	BnaA10g23170D	LK031790	2512656	2514372	+	-0.345141	1.60281	0	0.919633	1	-0.162936	1.60281	0	0.962185	1	-0.027951	1.60281	0	0.994293	1
GSBRNA2T00136055001	BnaA10g23180D	LK031790	2514596	2516709	+	1.28811	3.9544	1.21851	0.123709	1	-0.927565	3.9544	0	0.625169	1	1.66882	3.9544	2.80817	0.00818542	0.052751
GSBRNA2T00136056001	BnaA10g23190D	LK031790	2517124	2517725	+	0.941041	1.93134	0	0.575519	1	-0.890671	1.93134	0	0.639424	1	1.30576	1.93134	0.994919	0.170121	0.692311
GSBRNA2T00136057001	BnaA10g23200D	LK031790	2517791	2520191	+	-0.122025	4.19468	0	0.999884	1	0.0732378	4.19468	0	0.999938	1	0.0187929	4.19468	0	0.99998	1
GSBRNA2T00136060001	BnaA10g23220D	LK031790	2525243	2526499	-	-0.047568	3.78337	0	0.999962	1	-0.131308	3.78337	0	0.999843	1	0.614578	3.78337	0	0.979846	1
GSBRNA2T00136062001	BnaA10g23230D	LK031790	2532024	2535755	+	0.562418	5.29661	0	0.994083	1	-0.67558	5.29661	0	0.975505	1	0.360561	5.29661	0	0.999347	1
GSBRNA2T00136063001	BnaA10g23240D	LK031790	2536207	2538287	+	0.269509	3.53962	0	0.998817	1	-0.0229456	3.53962	0	0.999968	1	0.0259285	3.53962	0	0.999897	1
GSBRNA2T00136065001	BnaA10g23260D	LK031790	2545235	2546579	+	-0.344047	1.78069	0	0.948687	1	-0.305761	1.78069	0	0.944191	1	-2.61291	1.78069	-2.2937	0.0209	0.118304
GSBRNA2T00136066001	BnaA10g23270D	LK031790	2547057	2548808	+	-0.107302	4.13318	0	0.999857	1	-0.0285189	4.13318	0	0.999964	1	0.435028	4.13318	0	0.995919	1
GSBRNA2T00136071001	BnaA10g23300D	LK031790	2556694	2558956	-	0.0787851	3.01539	0	0.999812	1	-0.34416	3.01539	0	0.99641	1	0.170698	3.01539	0	0.999156	1
GSBRNA2T00136073001	BnaA10g23320D	LK031790	2565042	2566920	-	-2.37428	0.855632	-1.94729	0.0384053	0.762728	1.93518	0.855632	1.2887	0.112284	1	0.324885	0.855632	0	0.921028	1
GSBRNA2T00136077001	BnaA10g23360D	LK031790	2576740	2580838	+	0.297431	2.73445	0	0.987785	1	0.0855871	2.73445	0	0.998594	1	0.502911	2.73445	0	0.946175	1
GSBRNA2T00136079001	BnaA10g23380D	LK031790	2583129	2586890	-	0.190647	5.30432	0	0.999938	1	-0.115963	5.30432	0	0.999975	1	-0.311727	5.30432	0	0.999603	1
GSBRNA2T00136080001	BnaA10g23390D	LK031790	2590200	2592404	+	0.44567	3.47822	0	0.975204	1	-0.302449	3.47822	0	0.992344	1	0.800331	3.47822	0	0.773749	1
GSBRNA2T00136084001	BnaA10g23430D	LK031790	2614840	2620664	+	0.252018	4.11261	0	0.99971	1	-0.14411	4.11261	0	0.999919	1	0.0920167	4.11261	0	0.99991	1
GSBRNA2T00136087001	BnaA10g23460D	LK031790	2624570	2632294	-	-0.0387627	6.10563	0	0.999999	1	0.110549	6.10563	0	0.999997	1	-0.646689	6.10563	0	0.993064	1
GSBRNA2T00136088001	BnaA10g23470D	LK031790	2635226	2636928	+	-0.366827	3.52078	0	0.975182	1	-0.346022	3.52078	0	0.971207	1	-2.95486	3.52078	-3.48201	0.00241147	0.0188386
GSBRNA2T00136091001	BnaA10g23490D	LK031790	2648994	2651020	-	-0.0650056	2.12144	0	0.998447	1	-0.0223517	2.12144	0	0.999458	1	0.259925	2.12144	0	0.988918	1
GSBRNA2T00136092001	BnaA10g23500D	LK031790	2652647	2654945	-	-0.423212	6.89322	0	0.998689	1	-0.298286	6.89322	0	0.999655	1	-3.68922	6.89322	-14.5283	4.65921e-09	1.89138e-06
GSBRNA2T00136094001	BnaA10g23520D	LK031790	2657491	2659646	-	1.86995	1.20394	1.82335	0.0471893	0.897307	-2.29934	1.20394	-2.51221	0.014037	1	-6.26066	1.20394	-3.24937	0.00407558	0.0292042
GSBRNA2T00136096001	BnaA10g23530D	LK031790	2664123	2666007	-	0.267328	3.71901	0	0.999235	1	-0.0577837	3.71901	0	0.999945	1	0.236113	3.71901	0	0.999098	1
GSBRNA2T00136100001	BnaA10g23550D	LK031790	2668722	2670569	-	0.395438	2.34908	0	0.978837	1	0.107521	2.34908	0	0.998631	1	0.113731	2.34908	0	0.99528	1
GSBRNA2T00136101001	BnaA10g23560D	LK031790	2674245	2676252	+	-0.491474	2.34068	0	0.948731	1	-0.100728	2.34068	0	0.995394	1	-5.76175	2.34068	-4.31885	0.000579027	0.00577305
GSBRNA2T00136102001	BnaA10g23570D	LK031790	2676564	2678058	+	-0.546793	5.01844	0	0.994005	1	0.476848	5.01844	0	0.997354	1	0.323228	5.01844	0	0.99964	1
GSBRNA2T00136103001	BnaA10g23580D	LK031790	2678135	2680456	-	-0.0265875	3.98694	0	0.999978	1	-0.0176295	3.98694	0	0.999985	1	0.251778	3.98694	0	0.99939	1
GSBRNA2T00136104001	BnaA10g23590D	LK031790	2681249	2683186	+	0.848379	2.0288	0	0.713827	1	-0.73181	2.0288	0	0.844724	1	-0.236542	2.0288	0	0.979668	1
GSBRNA2T00136105001	BnaA10g23600D	LK031790	2683577	2688465	+	-0.596129	2.67213	0	0.912669	1	0.870373	2.67213	0	0.680184	1	0.862136	2.67213	0	0.712126	1
GSBRNA2T00136113001	BnaA10g23660D	LK031790	2724989	2726525	-	0.394885	5.19119	0	0.999456	1	0.351178	5.19119	0	0.999749	1	-1.46858	5.19119	-2.66144	0.0106925	0.066208
GSBRNA2T00136115001	BnaA10g23680D	LK031790	2728676	2730492	+	-0.243614	2.265	0	0.997351	1	-0.67326	2.265	0	0.885914	1	-2.40089	2.265	-3.41852	0.00269672	0.0206515
GSBRNA2T00136118001	BnaA10g23700D	LK031790	2738122	2739885	-	0.723457	3.04968	0	0.845455	1	-0.810247	3.04968	0	0.75572	1	-0.301047	3.04968	0	0.974506	1
GSBRNA2T00136119001	BnaA10g23710D	LK031790	2740178	2743294	+	0.156324	4.40245	0	0.999818	1	-0.0469035	4.40245	0	0.999964	1	-0.231538	4.40245	0	0.999187	1
GSBRNA2T00136123001	BnaA10g23740D	LK031790	2767039	2772115	+	0.106708	4.65573	0	0.999886	1	-0.132031	4.65573	0	0.999845	1	0.571435	4.65573	0	0.984826	1
GSBRNA2T00136124001	BnaA10g23750D	LK031790	2773462	2776940	+	-0.0864932	4.13558	0	0.999917	1	-0.165561	4.13558	0	0.999753	1	-1.95162	4.13558	-3.78732	0.00139058	0.0118101
GSBRNA2T00136130001	BnaA10g23810D	LK031790	2796893	2798146	-	-4.03508	1.71189	-7.4305	5.07877e-06	0.000426424	0.313756	1.71189	0	0.903866	1	-0.101417	1.71189	0	0.999861	1
GSBRNA2T00136131001	BnaA10g23820D	LK031790	2799216	2800989	+	-0.21955	2.76068	0	0.984966	1	0.0391594	2.76068	0	0.997597	1	0.43244	2.76068	0	0.951297	1
GSBRNA2T00136132001	BnaA10g23830D	LK031790	2801170	2804270	+	0.606495	0.92669	0	0.852903	1	-0.909215	0.92669	0	0.592879	1	0.341695	0.92669	0	0.938257	1
GSBRNA2T00136137001	BnaA10g23880D	LK031790	2819055	2821006	+	-0.0859223	2.23898	0	0.996803	1	0.0363678	2.23898	0	0.998688	1	0.454549	2.23898	0	0.95535	1
GSBRNA2T00136140001	BnaA10g23910D	LK031790	2826405	2827659	-	0.113327	4.53144	0	0.999751	1	0.0567864	4.53144	0	0.999906	1	1.57287	4.53144	3.22516	0.00382711	0.0277065
GSBRNA2T00136141001	BnaA10g23920D	LK031790	2828007	2828875	-	0.0143825	0.701517	0	0.998061	1	0.851031	0.701517	0	0.658298	1	-4.24696	0.701517	-3.66173	0.00178162	0.0145825
GSBRNA2T00136150001	BnaA10g23990D	LK031790	2889851	2891976	+	-0.140351	2.40125	0	0.995748	1	-0.0887075	2.40125	0	0.997028	1	0.0310116	2.40125	0	0.998877	1
GSBRNA2T00136151001	BnaA10g24000D	LK031790	2892078	2894219	+	0.43583	1.03812	0	0.917087	1	-0.526182	1.03812	0	0.877243	1	-0.71814	1.03812	0	0.706664	1
GSBRNA2T00136153001	BnaA10g24020D	LK031790	2895792	2898262	-	0.122362	3.09381	0	0.999629	1	-0.335665	3.09381	0	0.996577	1	-0.293778	3.09381	0	0.995318	1
GSBRNA2T00136154001	BnaA10g24030D	LK031790	2899013	2901689	+	-0.0355757	4.1732	0	0.999989	1	-0.338304	4.1732	0	0.999409	1	-4.28594	4.1732	-8.50054	1.34927e-06	6.14854e-05
GSBRNA2T00136155001	BnaA10g24040D	LK031790	2901819	2904395	-	0.580788	2.23827	0	0.967683	1	0.507689	2.23827	0	0.990933	1	-4.9571	2.23827	-5.42507	9.09694e-05	0.00131715
GSBRNA2T00136159001	BnaA10g24080D	LK031790	2912986	2914253	-	-0.694506	2.63557	0	0.689888	1	1.6786	2.63557	1.16974	0.13321	1	1.75567	2.63557	1.54423	0.0748485	0.349873
GSBRNA2T00136160001	BnaA10g24090D	LK031790	2914858	2916101	-	-0.602411	3.03153	0	0.726451	1	3.71859	3.03153	4.53908	0.000379779	0.102871	3.41999	3.03153	4.75746	0.000262493	0.00303813
GSBRNA2T00136163001	BnaA10g24110D	LK031790	2928421	2931060	+	0.00208447	4.4629	0	1	1	0.231386	4.4629	0	0.999912	1	0.412937	4.4629	0	0.999072	1
GSBRNA2T00136165001	BnaA10g24130D	LK031790	2935737	2939070	-	-0.299941	1.36959	0	0.978451	1	-0.1911	1.36959	0	0.984973	1	-0.964686	1.36959	0	0.534915	1
GSBRNA2T00136168001	BnaA10g24150D	LK031790	2942102	2944579	-	0.172346	0.44899	0	0.976667	1	0.15335	0.44899	0	0.983557	1	-2.97872	0.44899	-2.64435	0.0111353	0.0686997
GSBRNA2T00136175001	BnaA10g24210D	LK031790	2961750	2963762	-	-1.39012	-0.848533	-0.396075	0.366004	1	0.930975	-0.848533	0	0.568643	1	4.71088	-0.848533	5.70254	5.88775e-05	0.000932097
GSBRNA2T00136178001	BnaA10g24230D	LK031790	2982749	2984494	+	-1.05994	4.54588	-0.27061	0.395742	1	2.22018	4.54588	5.94118	4.03726e-05	0.0235053	4.21051	4.54588	20.3432	1.11128e-10	3.73626e-07
GSBRNA2T00136179001	BnaA10g24240D	LK031790	2990553	2991820	+	-0.819018	4.35962	0	0.710733	1	1.09218	4.35962	0.29571	0.386372	1	-0.70352	4.35962	0	0.80299	1
GSBRNA2T00136181001	BnaA10g24250D	LK031790	2995671	2998075	+	0.197689	3.74404	0	0.999681	1	-0.339638	3.74404	0	0.998475	1	-0.357417	3.74404	0	0.995999	1
GSBRNA2T00136182001	BnaA10g24260D	LK031790	2999593	3002334	-	0.13841	4.92681	0	0.999927	1	-0.0878837	4.92681	0	0.999963	1	-1.1924	4.92681	-1.02387	0.163467	0.669792
GSBRNA2T00136183001	BnaA10g24270D	LK031790	3003512	3004956	+	-1.69437	0.750957	-0.989905	0.172551	1	1.85795	0.750957	1.2396	0.120662	1	0.466437	0.750957	0	0.8413	1
GSBRNA2T00136184001	BnaA10g24280D	LK031790	3005641	3007992	-	0.0757499	2.17048	0	0.998373	1	-0.387044	2.17048	0	0.975089	1	-0.696423	2.17048	0	0.80167	1
GSBRNA2T00136185001	BnaA10g24290D	LK031790	3008387	3011649	-	0.365172	4.12201	0	0.99936	1	-0.0879146	4.12201	0	0.99998	1	-0.396502	4.12201	0	0.997432	1
GSBRNA2T00136186001	BnaA10g24300D	LK031790	3015270	3018040	+	0.385559	2.04953	0	0.971248	1	-0.330268	2.04953	0	0.980028	1	-0.273993	2.04953	0	0.968259	1
GSBRNA2T00136187001	BnaA10g24310D	LK031790	3018098	3019767	+	0.26056	4.67864	0	0.99981	1	0.102616	4.67864	0	0.999976	1	0.523749	4.67864	0	0.995431	1
GSBRNA2T00136190001	BnaA10g24340D	LK031790	3025544	3032384	-	0.00550281	3.63413	0	0.99999	1	0.122972	3.63413	0	0.999753	1	0.318552	3.63413	0	0.997729	1
GSBRNA2T00136193001	BnaA10g24360D	LK031790	3040283	3048907	+	0.152156	5.58091	0	0.999983	1	-0.0517505	5.58091	0	0.999996	1	0.217493	5.58091	0	0.999956	1
GSBRNA2T00136194001	BnaA10g24370D	LK031790	3048967	3050525	-	-0.167219	1.84514	0	0.99466	1	0.0134625	1.84514	0	0.999603	1	-0.0489006	1.84514	0	0.998032	1
GSBRNA2T00136195001	BnaA10g24380D	LK031790	3050708	3054482	+	0.370031	4.34866	0	0.997887	1	-0.094416	4.34866	0	0.999906	1	0.0245844	4.34866	0	0.999945	1
GSBRNA2T00136196001	BnaA10g24390D	LK031790	3054766	3057697	+	-0.579623	2.41122	0	0.901312	1	0.463664	2.41122	0	0.944899	1	-1.42605	2.41122	-1.01717	0.165038	0.675061
GSBRNA2T00136198001	BnaA10g24400D	LK031790	3059850	3061915	+	0.202985	4.35066	0	0.998734	1	-0.247873	4.35066	0	0.998045	1	-0.422351	4.35066	0	0.984043	1
GSBRNA2T00136199001	BnaA10g24410D	LK031790	3062070	3063963	+	-0.509891	3.15203	0	0.971498	1	0.489598	3.15203	0	0.975572	1	-0.695177	3.15203	0	0.865173	1
GSBRNA2T00136203001	BnaA10g24440D	LK031790	3071093	3076090	+	0.588464	3.39456	0	0.947851	1	-1.3981	3.39456	-1.47073	0.0840843	1	0.671417	3.39456	0	0.897725	1
GSBRNA2T00136206001	BnaA10g24470D	LK031790	3080584	3081701	-	1.62476	1.81345	2.08707	0.0299247	0.628551	-1.62135	1.81345	-2.0765	0.0304843	1	-3.84694	1.81345	-3.18016	0.00424415	0.030231
GSBRNA2T00136211001	BnaA10g24510D	LK031790	3156717	3161821	-	0.434488	1.29344	0	0.888543	1	-0.901684	1.29344	0	0.580084	1	1.04076	1.29344	0.0926157	0.46422	1
GSBRNA2T00136212001	BnaA10g24520D	LK031790	3162058	3162970	+	-0.268959	2.61974	0	0.989474	1	0.417786	2.61974	0	0.973955	1	0.320258	2.61974	0	0.986074	1
GSBRNA2T00136213001	BnaA10g24530D	LK031790	3163473	3168976	+	0.118385	3.40709	0	0.998698	1	0.117235	3.40709	0	0.998944	1	0.101242	3.40709	0	0.998313	1
GSBRNA2T00136214001	BnaA10g24540D	LK031790	3169039	3173084	-	-0.0887189	2.40122	0	0.99876	1	0.212335	2.40122	0	0.996343	1	-0.887545	2.40122	0	0.631853	1
GSBRNA2T00136216001	BnaA10g24560D	LK031790	3176956	3177523	-	-0.362387	4.51268	0	0.990619	1	0.388975	4.51268	0	0.988495	1	-7.12142	4.51268	-6.21997	2.85574e-05	0.000541607
GSBRNA2T00136217001	BnaA10g24570D	LK031790	3178659	3179189	-	-0.322839	2.1827	0	0.987578	1	-0.234671	2.1827	0	0.990075	1	-0.0804298	2.1827	0	0.997939	1
GSBRNA2T00136218001	BnaA10g24580D	LK031790	3179252	3185142	-	-0.297512	3.39161	0	0.995545	1	0.115698	3.39161	0	0.999022	1	0.256506	3.39161	0	0.996982	1
GSBRNA2T00136219001	BnaA10g24590D	LK031790	3186615	3189431	+	-0.0625128	3.89512	0	0.999895	1	0.168276	3.89512	0	0.999643	1	0.243943	3.89512	0	0.999017	1
GSBRNA2T00136220001	BnaA10g24600D	LK031790	3189782	3191887	+	-0.420001	3.9719	0	0.998616	1	0.429267	3.9719	0	0.998485	1	-0.0501597	3.9719	0	0.999981	1
GSBRNA2T00136221001	BnaA10g24610D	LK031790	3192257	3194142	-	-0.423028	5.24914	0	0.986759	1	0.302384	5.24914	0	0.994735	1	4.50797	5.24914	18.3632	3.50254e-10	5.16325e-07
GSBRNA2T00136225001	BnaA10g24640D	LK031790	3207214	3208958	-	0.1834	4.74753	0	0.999921	1	0.122651	4.74753	0	0.999966	1	-1.97021	4.74753	-4.62083	0.000328435	0.00362862
GSBRNA2T00136226001	BnaA10g24650D	LK031790	3209014	3210881	-	0.645547	1.78387	0	0.863591	1	-0.00822918	1.78387	0	0.999814	1	-1.43755	1.78387	-0.871788	0.200794	0.791652
GSBRNA2T00136228001	BnaA10g24670D	LK031790	3215769	3216425	-	-0.203413	2.23008	0	0.987392	1	0.540642	2.23008	0	0.922516	1	0.604624	2.23008	0	0.891924	1
GSBRNA2T00136229001	BnaA10g24680D	LK031790	3216488	3218327	-	-0.498655	2.19256	0	0.933949	1	1.18547	2.19256	0.649059	0.264523	1	0.144364	2.19256	0	0.993487	1
GSBRNA2T00136230001	BnaA10g24690D	LK031790	3219136	3220889	-	-0.347755	2.73265	0	0.93164	1	1.2275	2.73265	0.608509	0.277374	1	1.64923	2.73265	1.89961	0.0414144	0.2109
GSBRNA2T00136232001	BnaA10g24710D	LK031790	3229841	3232097	+	-0.397928	1.67527	0	0.933329	1	-0.333027	1.67527	0	0.933933	1	3.05511	1.67527	7.52031	4.49984e-06	0.000148038
GSBRNA2T00136233001	BnaA10g24720D	LK031790	3235101	3237473	+	1.1403	1.00213	0.252073	0.403969	1	-0.557519	1.00213	0	0.80579	1	4.38234	1.00213	7.15466	7.33012e-06	0.00020568
GSBRNA2T00136234001	BnaA10g24730D	LK031790	3237841	3238684	-	0.141544	2.38636	0	0.995799	1	0.153708	2.38636	0	0.996252	1	-1.49019	2.38636	-1.12518	0.141771	0.596244
GSBRNA2T00136235001	BnaA10g24740D	LK031790	3240183	3242338	+	-0.379411	1.96867	0	0.986519	1	-0.306607	1.96867	0	0.987046	1	-1.10323	1.96867	-0.319812	0.377438	1
GSBRNA2T00136238001	BnaA10g24760D	LK031790	3250177	3251914	+	-0.0275292	1.53531	0	0.997877	1	-0.243933	1.53531	0	0.97219	1	0.789217	1.53531	0	0.731113	1
GSBRNA2T00136239001	BnaA10g24770D	LK031790	3253498	3254888	+	0.309929	4.01084	0	0.998535	1	0.204667	4.01084	0	0.999641	1	-1.09417	4.01084	-0.386676	0.353026	1
GSBRNA2T00136240001	BnaA10g24780D	LK031790	3256249	3258816	-	-0.157244	4.90569	0	0.999852	1	0.21361	4.90569	0	0.99974	1	-0.0723224	4.90569	0	0.999933	1
GSBRNA2T00136243001	BnaA10g24810D	LK031790	3264474	3265631	-	-0.0930946	4.91039	0	0.999971	1	-0.00643094	4.91039	0	0.999998	1	0.394188	4.91039	0	0.999094	1
GSBRNA2T00136244001	BnaA10g24820D	LK031790	3267451	3270593	+	-0.637704	3.5357	0	0.826977	1	2.72031	3.5357	5.43547	8.75783e-05	0.038368	3.36542	3.5357	8.94822	7.98947e-07	4.28186e-05
GSBRNA2T00136247001	BnaA10g24850D	LK031790	3274705	3277663	+	0.338042	3.81395	0	0.99735	1	-0.178561	3.81395	0	0.999501	1	0.361495	3.81395	0	0.995403	1
GSBRNA2T00136248001	BnaA10g24860D	LK031790	3285101	3289201	+	0.299743	2.23811	0	0.969886	1	-0.069793	2.23811	0	0.995798	1	0.820611	2.23811	0	0.696929	1
GSBRNA2T00136249001	BnaA10g24870D	LK031790	3289251	3292956	-	0.0998313	4.98252	0	0.999986	1	-0.161159	4.98252	0	0.999969	1	-0.395453	4.98252	0	0.999169	1
GSBRNA2T00136251001	BnaA10g24890D	LK031790	3295531	3299565	+	0.0138771	5.38553	0	0.999997	1	-0.0998906	5.38553	0	0.999969	1	-0.0461926	5.38553	0	0.999984	1
GSBRNA2T00136253001	BnaA10g24910D	LK031790	3302794	3304353	+	-0.573369	1.34503	0	0.834342	1	0.320149	1.34503	0	0.931545	1	0.0226498	1.34503	0	0.996732	1
GSBRNA2T00136254001	BnaA10g24920D	LK031790	3304471	3311235	-	0.206709	4.1126	0	0.999919	1	-0.138096	4.1126	0	0.999966	1	-0.057742	4.1126	0	0.999974	1
GSBRNA2T00136256001	BnaA10g24940D	LK031790	3313085	3315538	-	0.00375939	4.44892	0	1	1	-0.176719	4.44892	0	0.999964	1	0.239018	4.44892	0	0.999919	1
GSBRNA2T00136257001	BnaA10g24950D	LK031790	3315927	3317821	+	-0.22463	2.17808	0	0.992346	1	0.0883697	2.17808	0	0.997561	1	0.027432	2.17808	0	0.999155	1
GSBRNA2T00136262001	BnaA10g24990D	LK031790	3330038	3330652	-	0.727189	1.94198	0	0.750721	1	0.985681	1.94198	0	0.518844	1	2.51851	1.94198	4.37575	0.000497847	0.00509807
GSBRNA2T00136263001	BnaA10g25000D	LK031790	3333293	3334847	-	0.554504	2.36886	0	0.802649	1	-0.0675401	2.36886	0	0.985591	1	2.14012	2.36886	2.44153	0.0159364	0.0937705
GSBRNA2T00136264001	BnaA10g25010D	LK031790	3336089	3338464	-	0.39119	3.73946	0	0.987575	1	1.12848	3.73946	0.582546	0.285718	1	-5.73449	3.73946	-4.95675	0.000196617	0.00241262
GSBRNA2T00136266001	BnaA10g25020D	LK031790	3340608	3341255	-	-0.239374	1.24337	0	0.970093	1	-0.00237905	1.24337	0	0.999725	1	-0.538896	1.24337	0	0.844447	1
GSBRNA2T00136267001	BnaA10g25030D	LK031790	3341554	3342496	+	-0.0524733	5.00505	0	0.999953	1	0.749678	5.00505	0	0.921981	1	0.906083	5.00505	0	0.707766	1
GSBRNA2T00136268001	BnaA10g25040D	LK031790	3342611	3343591	-	-0.172591	1.82708	0	0.998702	1	-0.851841	1.82708	0	0.709053	1	-2.12073	1.82708	-2.9612	0.00619319	0.0416976
GSBRNA2T00136269001	BnaA10g25050D	LK031790	3343867	3344859	-	-0.443049	3.80403	0	0.987728	1	0.261755	3.80403	0	0.997046	1	0.398002	3.80403	0	0.993267	1
GSBRNA2T00136270001	BnaA10g25060D	LK031790	3347090	3348900	-	0.239246	2.78978	0	0.996414	1	-0.293196	2.78978	0	0.994138	1	-0.124105	2.78978	0	0.997052	1
GSBRNA2T00136273001	BnaA10g25070D	LK031790	3354659	3356418	+	-0.696949	2.97424	0	0.785435	1	2.22628	2.97424	3.80492	0.00134795	0.249556	4.44435	2.97424	13.7885	8.2833e-09	2.71133e-06
GSBRNA2T00136275001	BnaA10g25090D	LK031790	3358305	3361344	-	-0.0113493	3.23341	0	0.999954	1	0.131263	3.23341	0	0.999428	1	0.15632	3.23341	0	0.998838	1
GSBRNA2T00136279001	BnaA10g25110D	LK031790	3366080	3367302	+	0.231381	3.26684	0	0.999752	1	-0.974901	3.26684	0	0.555206	1	-3.04925	3.26684	-5.80361	4.97135e-05	0.000822019
GSBRNA2T00136283001	BnaA10g25150D	LK031790	3375991	3378073	+	0.301357	0.886323	0	0.95205	1	-1.2797	0.886323	-0.583795	0.285572	1	-0.14023	0.886323	0	0.970799	1
GSBRNA2T00136284001	BnaA10g25160D	LK031790	3378335	3380375	-	0.405267	3.65795	0	0.990728	1	0.156776	3.65795	0	0.999364	1	0.81283	3.65795	0	0.794563	1
GSBRNA2T00136287001	BnaA10g25180D	LK031790	3386522	3389260	+	0.150974	3.37632	0	0.999093	1	-0.256178	3.37632	0	0.997445	1	0.369672	3.37632	0	0.992321	1
GSBRNA2T00136290001	BnaA10g25210D	LK031790	3394769	3396884	-	-0.127274	5.7929	0	0.999987	1	-0.216602	5.7929	0	0.999961	1	-3.09831	5.7929	-11.721	4.76023e-08	7.4688e-06
GSBRNA2T00136291001	BnaA10g25220D	LK031790	3399105	3401699	-	-0.103389	4.80671	0	0.999974	1	0.322277	4.80671	0	0.999717	1	0.207991	4.80671	0	0.9999	1
GSBRNA2T00136293001	BnaA10g25240D	LK031790	3409761	3412599	-	0.0389364	2.9443	0	0.998931	1	-0.0900103	2.9443	0	0.997258	1	0.97913	2.9443	0	0.530575	1
GSBRNA2T00136295001	BnaA10g25250D	LK031790	3420785	3422232	+	-0.0663526	5.20483	0	0.99998	1	0.126491	5.20483	0	0.999954	1	-0.270417	5.20483	0	0.99966	1
GSBRNA2T00136297001	BnaA10g25260D	LK031790	3424468	3428433	-	-0.299732	4.26356	0	0.999454	1	0.34716	4.26356	0	0.999128	1	-0.124124	4.26356	0	0.999885	1
GSBRNA2T00136298001	BnaA10g25270D	LK031790	3428598	3432671	+	0.0873882	5.29963	0	0.999993	1	-0.00705014	5.29963	0	1	1	0.104383	5.29963	0	0.999988	1
GSBRNA2T00136301001	BnaA10g25300D	LK031790	3439846	3440746	+	-0.378608	2.29112	0	0.975096	1	0.255482	2.29112	0	0.988044	1	-0.511198	2.29112	0	0.92129	1
GSBRNA2T00136302001	BnaA10g25310D	LK031790	3440820	3445621	+	0.208458	5.24756	0	0.999972	1	-0.36106	5.24756	0	0.999808	1	-0.228962	5.24756	0	0.999941	1
GSBRNA2T00136303001	BnaA10g25320D	LK031790	3445704	3449657	-	0.0982619	5.59109	0	0.999993	1	0.32329	5.59109	0	0.999904	1	1.08203	5.59109	0.651431	0.26378	0.983647
GSBRNA2T00136305001	BnaA10g25330D	LK031790	3456532	3458635	+	-0.036915	3.9911	0	0.999981	1	0.167679	3.9911	0	0.99989	1	0.74383	3.9911	0	0.93591	1
GSBRNA2T00136306001	BnaA10g25340D	LK031790	3458689	3459887	-	0.131631	2.90203	0	0.997111	1	0.164415	2.90203	0	0.996968	1	0.906605	2.90203	0	0.639608	1
GSBRNA2T00136307001	BnaA10g25350D	LK031790	3460078	3462041	+	-0.720777	4.18854	0	0.960534	1	0.0356676	4.18854	0	0.999989	1	-0.888992	4.18854	0	0.75012	1
GSBRNA2T00136308001	BnaA10g25360D	LK031790	3462198	3467488	-	-0.0923336	3.09138	0	0.999778	1	0.19644	3.09138	0	0.999394	1	-0.0171337	3.09138	0	0.999938	1
GSBRNA2T00136310001	BnaA10g25380D	LK031790	3471505	3475702	-	-0.366675	4.80118	0	0.997887	1	0.107377	4.80118	0	0.999838	1	-1.25587	4.80118	-1.22748	0.122078	0.526379
GSBRNA2T00136311001	BnaA10g25390D	LK031790	3475866	3476997	+	-0.125549	1.44236	0	0.98577	1	0.610844	1.44236	0	0.855936	1	0.428174	1.44236	0	0.923626	1
GSBRNA2T00136313001	BnaA10g25410D	LK031790	3479109	3481530	+	-0.0866161	4.13313	0	0.999892	1	0.575088	4.13313	0	0.985995	1	0.596482	4.13313	0	0.980222	1
GSBRNA2T00136315001	BnaA10g25430D	LK031790	3490437	3493601	+	-0.203055	5.52456	0	0.999873	1	-0.364142	5.52456	0	0.999125	1	-1.04116	5.52456	-0.246816	0.404699	1
GSBRNA2T00136316001	BnaA10g25440D	LK031790	3496518	3498616	+	-0.0106991	3.73458	0	0.999993	1	-0.0527749	3.73458	0	0.999964	1	-0.449913	3.73458	0	0.993066	1
GSBRNA2T00136321001	BnaA10g25470D	LK031790	3518727	3521258	-	-0.0991347	1.66347	0	0.997556	1	0.0689559	1.66347	0	0.998328	1	-1.27635	1.66347	-0.70741	0.246741	0.933864
GSBRNA2T00136325001	BnaA10g25510D	LK031790	3539232	3543336	-	0.608807	4.37371	0	0.966757	1	-0.255432	4.37371	0	0.999068	1	0.14141	4.37371	0	0.999235	1
GSBRNA2T00136326001	BnaA10g25520D	LK031790	3544658	3545698	-	-0.309771	5.31089	0	0.998698	1	0.75697	5.31089	0	0.901917	1	0.037705	5.31089	0	0.999947	1
[truncated: 42,747 more rows]

## Sheet: Tab_S10
Table S10. log-CPM values. R - resistant, S - susceptible, I - Inoculated, C - control
[truncated: 44,249 more rows]

[truncated: 3 more sheets: Tab_S11, Tab_S12, Tab_S13]
